# Supplementary material for: Brain Transcriptome of Autism Spectrum Disorders and Tourette Syndrome Defines Common Targetable Inflammatory Pathways Involving Cytokines, Complement, and Kinase Signalling
Source: Research Square preprint supplement (doi:10.21203/rs.3.rs-885680/v1), 2021-09-21
Supplement: Supplementary file 1 [file 2e292f8f0d30e97cfa7a33e8.xlsx]

## Sheet: Common DEGs
Gene		symbol	ENTREZID		ASD DGE	logFC	logCPM	F	PValue	FDR	direction		Tourette's syndrome DGE	logFC	logCPM	F	PValue	FDR	direction
ENSG00000125538.7	NM_000576.2	IL1B	3553			2.07295	1.24362	28.8134	6.19523e-07	0.00353249	up			3.61946	3.14043	28.0211	5.17404e-06	0.00443345	up
ENSG00000007908.11	NM_000450.2	SELE	6401			2.66815	1.51199	27.3064	1.12072e-06	0.00366767	up			4.44543	4.28722	35.2777	6.68702e-07	0.00140063	up
ENSG00000173530.5	NM_003840.4	TNFRSF10D	8793			1.10283	0.917867	26.0348	1.86068e-06	0.0050744	up			1.9953	3.60743	17.554	0.000158339	0.0307717	up
ENSG00000011422.7	NM_001005376.2	PLAUR	5329			1.18001	1.40487	23.9457	4.33989e-06	0.00747512	up			1.74294	-0.27594	17.3756	0.000168863	0.0315171	up
ENSG00000132465.6	NM_144646.3	IGJ	3512			2.38125	-1.56879	23.1009	6.14392e-06	0.00837774	up			2.88488	2.24169	16.041	0.000275335	0.0411931	up
ENSG00000130222.6	NM_006705.3	GADD45G	10912			0.896347	1.56906	22.515	7.8328e-06	0.00915486	up			0.750403	4.79151	11.8139	0.00142959	0.0965922	up
ENSG00000006747.10	NM_001112706.2	SCIN	85477			1.61547	2.57599	21.6663	1.11653e-05	0.0110726	up			1.51664	1.57553	11.1057	0.00191555	0.113912	up
ENSG00000106211.8	NM_001540.3	HSPB1	3315			1.40937	4.5648	21.4861	1.20431e-05	0.0114012	up			1.14668	8.77203	17.0312	0.000191324	0.0324924	up
ENSG00000131747.10	NM_001067.3	TOP2A	7153			1.60715	-0.102818	21.167	1.3775e-05	0.0115308	up			2.41678	2.08274	14.8599	0.000429418	0.0509117	up
ENSG00000090920.9	NM_003890.2	FCGBP	8857			1.47933	4.67424	20.9127	1.53373e-05	0.0115308	up			2.73483	5.58402	26.5509	8.06192e-06	0.00524053	up
ENSG00000134061.4	NM_005582.2	CD180	4064			1.28156	0.302028	20.9063	1.5379e-05	0.0115308	up			1.3671	2.1234	13.0786	0.000858569	0.0729049	up
ENSG00000090339.4	NM_000201.2	ICAM1	3383			1.3593	2.30253	20.8272	1.59026e-05	0.0115308	up			1.76925	5.94355	25.8974	9.85301e-06	0.00546292	up
ENSG00000164761.4	NM_002546.3	TNFRSF11B	4982			0.926603	0.571173	19.7144	2.55474e-05	0.0145613	up			1.31953	2.80543	7.01792	0.0116587	0.290949	up
ENSG00000133048.8	NM_001276.2	CHI3L1	1116			1.44729	4.26971	19.5252	2.77078e-05	0.0145613	up			1.98281	8.93489	18.6172	0.000108432	0.0255507	up
ENSG00000173369.11	NM_000491.4	C1QB	713			1.27151	4.65298	19.4615	2.84765e-05	0.0145613	up			2.0917	7.88999	25.107	1.25963e-05	0.00664112	up
ENSG00000183476.8	NM_001101404.1	SH2D7	646892			0.701985	-0.766763	18.1837	4.95197e-05	0.0183022	up			0.816021	0.941587	8.15065	0.00691162	0.226965	up
ENSG00000100292.12	NM_002133.2	HMOX1	3162			1.23264	2.1727	18.0278	5.30082e-05	0.0183852	up			1.10533	5.86612	14.6931	0.00045765	0.0525817	up
ENSG00000129450.4	NM_014441.2	SIGLEC9	27180			1.26097	-0.238831	17.9757	5.42283e-05	0.0184862	up			2.36925	0.646873	17.1198	0.000185255	0.0322629	up
ENSG00000137801.9	NM_003246.3	THBS1	7057			0.921851	4.94962	17.6894	6.14737e-05	0.019845	up			0.856542	5.82203	6.38228	0.0157748	0.339627	up
ENSG00000176387.6	NM_000196.3	HSD11B2	3291			0.738086	-0.65567	17.6772	6.1803e-05	0.019845	up			1.12395	3.22582	8.04573	0.00724876	0.231547	up
ENSG00000152049.5	NM_080671.3	KCNE4	23704			1.03455	1.80973	17.1342	7.84941e-05	0.021766	up			0.627992	5.06779	6.26272	0.016711	0.346175	up
ENSG00000168309.12	NM_001282714.1	FAM107A	11170			0.53467	8.63569	17.1026	7.95951e-05	0.021766	up			0.937581	3.89011	11.0111	0.00199266	0.117755	up
ENSG00000013588.5	NM_003979.3	GPRC5A	9052			1.33178	-0.21274	16.8016	9.09388e-05	0.0228837	up			1.3574	0.673889	10.4438	0.00253032	0.135895	up
ENSG00000164626.8	NM_003740.3	KCNK5	8645			1.07653	-1.86619	16.5706	0.000100765	0.0238081	up			1.02348	-0.0879228	11.6208	0.00154752	0.100942	up
ENSG00000248323.1	NR_103549.1	LUCAT1	100505994			1.36841	-1.32664	16.471	0.000105327	0.0244464	up			2.30618	-1.1844	12.9375	0.0011285	0.0837533	up
ENSG00000197405.3	NM_001736.3	C5AR1	728			1.0541	0.624459	16.3254	0.000112389	0.0248516	up			1.30008	3.45484	9.49776	0.00379967	0.168933	up
ENSG00000170439.5	NM_152637.2	METTL7B	196410			0.886928	0.363292	16.2182	0.000117897	0.0255517	up			0.868392	2.51413	8.53947	0.00580104	0.209895	up
ENSG00000159189.7	NM_001347619.1	C1QC	714			1.0862	3.92176	16.202	0.000118752	0.0255675	up			2.61861	-1.21958	13.0695	0.00107434	0.0813347	up
ENSG00000162645.8	NM_004120.4	GBP2	2634			1.05901	2.88001	16.0798	0.000125424	0.0263117	up			1.17738	5.62189	11.5942	0.00156455	0.101353	up
ENSG00000182541.13	NM_001031801.1	LIMK2	3985			0.527991	4.03934	15.9468	0.000133119	0.0267449	up			0.858511	2.05361	10.1917	0.00281701	0.144814	up
ENSG00000121594.7	NM_005191.3	CD80	941			0.943055	-1.39331	15.9033	0.00013574	0.0267449	up			1.68324	-0.760939	9.21775	0.00429448	0.179502	up
ENSG00000183615.5	NM_032648.2	FAM167B	84734			0.959037	-1.78596	15.6495	0.000152125	0.0282787	up			2.10355	2.73857	21.0779	4.64993e-05	0.0146093	up
ENSG00000038945.10	NM_002445.3	MSR1	4481			1.31613	2.39332	15.4	0.000170226	0.0301124	up			1.95315	1.45886	15.5373	0.00033233	0.0448515	up
ENSG00000135451.8	NM_005480.3	TROAP	10024			1.49475	-2.46553	15.2126	0.000185262	0.0320273	up			1.61443	-0.676215	6.36157	0.0159328	0.340786	up
ENSG00000108691.5	NM_002982.3	CCL2	6347			1.57201	0.701215	15.2045	0.000185943	0.0320273	up			3.11727	4.81939	27.0504	6.92597e-06	0.00483561	up
ENSG00000134531.5	NM_001423.2	EMP1	2012			1.22565	3.2803	15.1337	0.000191992	0.0322212	up			1.36193	6.8321	13.6743	0.000678846	0.0624265	up
ENSG00000171236.9	NM_052972.2	LRG1	116844			1.25418	-1.18498	15.0835	0.000196408	0.0322292	up			3.24587	1.67093	33.2055	1.17268e-06	0.00152556	up
ENSG00000221869.4	NM_005195.3	CEBPD	1052			0.823884	3.93895	15.0228	0.000201891	0.0327083	up			1.2376	7.57104	12.155	0.001244	0.0891737	up
ENSG00000169429.6	NM_000584.3	IL8	3576			1.78562	1.17731	14.9209	0.000211447	0.0337552	up			2.29866	3.93747	13.7294	0.00066438	0.0624265	up
ENSG00000216490.3	NM_006332.4	IFI30	10437			1.87212	1.29198	14.8539	0.000217975	0.0338078	up			1.93888	5.00841	26.6887	7.73007e-06	0.00520427	up
ENSG00000163734.4	NM_002090.2	CXCL3	2921			1.21222	-2.11804	14.8261	0.000220749	0.0338804	up			2.6162	0.363739	18.139	0.000128433	0.0275124	up
ENSG00000198019.8	NR_027484.2	FCGR1B	100132417			0.954928	0.680205	14.6844	0.000235448	0.0341343	up			2.0065	-0.877046	10.7484	0.00222471	0.1242	up
ENSG00000112984.7	NM_005733.2	KIF20A	10112			1.06848	-1.61963	14.5192	0.000253869	0.0350553	up			2.23483	0.321743	15.4852	0.000338906	0.0453101	up
ENSG00000125753.9	NM_003370.3	VASP	7408			0.457707	2.50149	14.2253	0.000290386	0.0381653	up			0.743487	6.41283	13.0804	0.000857973	0.0729049	up
ENSG00000184557.3	NM_003955.4	SOCS3	9021			1.78553	3.52432	14.1922	0.000294817	0.0382704	up			3.37702	7.00562	33.8766	9.75809e-07	0.00152556	up
ENSG00000136997.10	NM_002467.4	MYC	4609			0.731394	1.73056	14.1622	0.000298909	0.0382704	up			1.48261	3.31848	23.9295	1.82744e-05	0.00770955	up
ENSG00000159403.11	NM_001733.4	C1R	715			0.567451	3.24087	14.0808	0.000310276	0.0389078	up			0.980712	6.88492	10.7792	0.00219607	0.123946	up
ENSG00000237649.3	NM_002263.3	KIFC1	3833			1.05936	-1.49136	14.0762	0.000310929	0.0389078	up			0.976391	1.12703	7.86724	0.00786342	0.238977	up
ENSG00000164708.5	NM_000290.3	PGAM2	5224			0.907884	1.17646	14.0407	0.000316052	0.0389078	up			0.535262	4.85117	7.12564	0.0110838	0.283288	up
ENSG00000165886.4	NM_024954.4	UBTD1	80019			0.329765	2.45188	14.0377	0.000316488	0.0389078	up			0.39961	5.96316	8.44782	0.00604445	0.213523	up
ENSG00000168404.8	NM_152649.3	MLKL	197259			0.692931	1.50674	14.0209	0.000318935	0.0389078	up			1.83106	1.56076	15.545	0.000331377	0.0448515	up
ENSG00000105697.3	NM_021175.3	HAMP	57817			1.35851	0.51271	14.0163	0.000319601	0.0389078	up			2.41751	3.79445	29.238	3.6126e-06	0.00344771	up
ENSG00000116096.5	NM_003124.4	SPR	6697			0.519962	2.60458	13.9765	0.000325514	0.0390568	up			0.801721	5.7388	22.2066	3.19451e-05	0.0115807	up
ENSG00000213719.4	NM_001288.4	CLIC1	1192			0.699908	3.06284	13.9745	0.000325811	0.0390568	up			1.37616	0.287877	10.94	0.00205281	0.120179	up
ENSG00000146112.7	NM_133471.3	PPP1R18	170954			0.548425	3.11955	13.6746	0.000374071	0.0420386	up			1.30529	2.88482	11.2191	0.0018272	0.109348	up
ENSG00000175567.4	NM_003355.2	UCP2	7351			0.771062	1.2923	13.6359	0.000380823	0.0420386	up			0.923229	5.9627	13.8266	0.000639626	0.0618338	up
ENSG00000149418.6	NM_021978.3	ST14	6768			0.83813	0.912836	13.6342	0.000381111	0.0420386	up			1.35849	1.97334	16.2522	0.0002546	0.0397358	up
ENSG00000169245.4	NM_001565.3	CXCL10	3627			2.61132	2.21466	13.3144	0.000441919	0.0443071	up			6.11324	5.34645	36.0703	5.41779e-07	0.00140063	up
ENSG00000188488.9	NM_000624.5	SERPINA5	5104			1.63472	-1.35162	13.2398	0.000457487	0.0445825	up			3.16909	3.78064	40.2482	1.85466e-07	0.000582703	up
ENSG00000149489.4	NM_000327.3	ROM1	6094			0.51339	2.68109	13.2172	0.000462309	0.0446298	up			0.781583	6.70189	10.9195	0.00207054	0.120468	up
ENSG00000196136.12	NM_001085.4	SERPINA3	12			2.04069	4.29203	13.1845	0.000469388	0.04518	up			3.33463	8.49702	33.1265	1.19846e-06	0.00152556	up
ENSG00000163191.5	NM_005620.1	S100A11	6282			0.860371	0.535564	13.1392	0.000479394	0.0453318	up			1.22741	5.65708	19.0372	9.35723e-05	0.0228839	up
ENSG00000173535.9	NM_003841.4	TNFRSF10C	8794			0.896192	-1.04885	13.1203	0.000483615	0.0453318	up			0.848283	1.09724	6.31041	0.0163306	0.343066	up
ENSG00000147174.7	NM_052957.4	ACRC	93953			0.586316	2.493	13.1178	0.000484182	0.0453318	up			0.947131	2.08729	6.50557	0.0148682	0.332874	up
ENSG00000158966.9	NM_020925.2	CACHD1	57685			0.281622	5.19688	13.1121	0.000485464	0.0453318	up			-0.994095	0.608487	14.1164	0.000571466	0.057951	down
ENSG00000180353.6	NM_005335.5	HCLS1	3059			0.625787	2.845	13.0043	0.000510453	0.0462561	up			1.4604	-0.788513	6.51463	0.0148038	0.331827	up
ENSG00000136286.10	NM_033054.2	MYO1G	64005			1.09763	0.457363	12.9838	0.000515363	0.0464621	up			1.71939	1.69321	19.5381	7.86141e-05	0.0222535	up
ENSG00000166278.10	NM_001282459.1	C2	717			0.78883	1.89713	12.9264	0.000529325	0.0472008	up			1.08519	-0.573553	6.40963	0.0155687	0.338116	up
ENSG00000099860.4	NM_015675.3	GADD45B	4616			1.13088	4.50896	12.8896	0.000538503	0.0477589	up			0.865661	7.29694	12.0351	0.00130612	0.0908552	up
ENSG00000141574.3	NM_003004.2	SECTM1	6398			1.25142	-0.112796	12.7633	0.000571224	0.0483461	up			1.86249	2.63433	25.905	9.82998e-06	0.00546292	up
ENSG00000160883.6	NM_002115.2	HK3	3101			0.833975	-0.20734	12.6986	0.000588774	0.0490399	up			1.57643	1.05257	16.9685	0.000195741	0.0329457	up
ENSG00000143819.8	NM_001136018.3	EPHX1	2052			0.458235	4.62883	12.6471	0.000603146	0.0495766	up			-1.53836	-1.41817	8.18135	0.00912943	0.260361	down
ENSG00000117228.9	NM_002053.2	GBP1	2633			1.06786	3.1794	12.4952	0.000647667	0.0513209	up			1.34259	5.46625	12.2915	0.00117702	0.0860002	up
ENSG00000075643.5	NM_017947.2	MOCOS	55034			0.507799	-0.527654	12.253	0.000725758	0.0550425	up			0.846027	0.909474	7.41512	0.00968415	0.267677	up
ENSG00000157557.7	NM_005239.5	ETS2	2114			-0.28362	6.76594	12.2526	0.000725888	0.0550425	down			1.14201	0.426729	9.00379	0.00471872	0.187664	up
ENSG00000128340.10	NM_002872.4	RAC2	5880			0.899317	-0.172162	12.2217	0.000736552	0.0554613	up			1.43131	3.44315	17.0755	0.000188262	0.0322629	up
ENSG00000102265.7	NM_003254.2	TIMP1	7076			0.815362	2.43093	12.1801	0.000751129	0.056122	up			0.992644	6.99312	14.3004	0.000532203	0.0559933	up
ENSG00000188522.10	NM_001039999.2	FAM83G	644815			0.652093	0.25664	12.1736	0.000753417	0.0561647	up			1.0024	1.31202	9.296	0.00414964	0.176182	up
ENSG00000103966.5	NM_139265.3	EHD4	30844			0.370175	3.2403	12.1632	0.000757143	0.0562801	up			0.624401	4.99199	9.85818	0.00325036	0.156066	up
ENSG00000155629.10	NM_152309.2	PIK3AP1	118788			0.728291	2.93269	12.0777	0.000788319	0.0575422	up			1.21997	4.76803	11.5282	0.00160771	0.103312	up
ENSG00000140030.4	NM_003608.3	GPR65	8477			0.821212	-0.267481	11.7348	0.000927237	0.062172	up			1.59447	1.97876	10.4604	0.00251256	0.135326	up
ENSG00000187840.4	NM_004095.3	EIF4EBP1	1978			0.475317	0.708814	11.5332	0.00102051	0.0650853	up			0.738066	4.08951	14.2885	0.000534656	0.0559933	up
ENSG00000100368.9	NM_000395.2	CSF2RB	1439			0.618939	0.76076	11.5133	0.0010302	0.0650853	up			0.988604	2.94526	6.98326	0.0118505	0.292399	up
ENSG00000064932.11	NM_014963.2	SBNO2	22904			0.534568	3.51243	11.4957	0.00103886	0.0651671	up			0.796735	1.21329	7.99809	0.00740763	0.233279	up
ENSG00000115956.9	NM_002664.2	PLEK	5341			0.726459	1.995	11.4743	0.00104953	0.0651747	up			1.0501	4.6279	14.9372	0.00041696	0.0500644	up
ENSG00000139572.3	NM_020370.2	GPR84	53831			1.05369	-1.10937	11.4374	0.00106814	0.0659547	up			2.61473	0.680671	20.49	5.67202e-05	0.0172457	up
ENSG00000018280.12	NM_000578.3	SLC11A1	6556			1.26852	2.38911	11.3002	0.00114041	0.0682861	up			2.08115	3.69131	41.8345	1.25377e-07	0.000543971	up
ENSG00000258647.1	NR_021493.1	LINC00930	100144604			0.897638	-1.28232	11.1262	0.00123945	0.0725585	up			1.36404	-0.965286	6.29887	0.0164218	0.343582	up
ENSG00000006327.9	NM_016639.2	TNFRSF12A	51330			1.15711	0.182391	11.1225	0.0012416	0.0725585	up			1.42401	2.90857	19.2551	8.67261e-05	0.0226382	up
ENSG00000198805.7	NM_000270.3	PNP	4860			0.599719	2.75578	11.0493	0.00128595	0.0739233	up			1.2928	5.89746	23.9074	1.84038e-05	0.00770955	up
ENSG00000188313.8	NM_021105.2	PLSCR1	5359			0.649907	3.04691	10.9909	0.00132249	0.0748552	up			0.927865	6.37077	7.5491	0.00910163	0.260356	up
ENSG00000255398.2	NM_006018.2	HCAR3	8843			1.15647	-2.40646	10.9844	0.00132665	0.0748552	up			1.45491	-1.02828	6.46093	0.0151898	0.334087	up
ENSG00000244731.3	NM_001002029.3	C4A	721			0.884668	4.62795	10.7907	0.00145615	0.0791594	up			1.6163	4.88335	11.8624	0.0014015	0.095714	up
ENSG00000128165.7	NM_001253845.1	ADM2	79924			1.2601	-1.9708	10.7152	0.00151012	0.0808842	up			1.55281	-1.03258	8.08239	0.00712901	0.230429	up
ENSG00000142347.12	NM_012335.3	MYO1F	4542			0.519339	2.661	10.677	0.00153819	0.0818519	up			1.27169	4.51816	19.2981	8.5439e-05	0.0226382	up
ENSG00000185955.4	NM_001004323.1	C7orf61	402573			0.72025	-0.323229	10.6522	0.00155671	0.082435	up			0.944613	3.34461	13.9825	0.000601933	0.0590991	up
ENSG00000003402.15	NM_001127183.2	CFLAR	8837			0.265165	5.7377	10.4984	0.00167682	0.0855287	up			0.587552	2.26851	9.84044	0.00327532	0.156066	up
ENSG00000170264.8	NM_001201543.1	FAM161A	84140			0.200857	3.53578	10.3794	0.00177634	0.0888876	up			-1.73524	-1.3978	8.58196	0.00639326	0.219487	down
ENSG00000169385.2	NM_002934.2	RNASE2	6036			1.27819	-1.63183	10.376	0.00177926	0.0888978	up			2.86776	2.34505	24.4658	1.54112e-05	0.00701836	up
ENSG00000110200.4	NM_001278494.1	ANAPC15	25906			-0.217293	3.50168	10.3507	0.00180124	0.0893141	down			1.12854	-0.264151	10.2425	0.00275651	0.142364	up
ENSG00000157456.3	NM_004701.3	CCNB2	9133			0.596495	-1.22058	10.3389	0.00181156	0.0896898	up			1.16095	0.415609	6.0049	0.0189402	0.364373	up
ENSG00000160796.12	NM_015175.2	NBEAL2	23218			0.384535	3.39193	10.2391	0.00190155	0.0919206	up			0.818975	4.30966	11.69	0.0015041	0.0998376	up
ENSG00000159167.7	NM_003155.2	STC1	6781			1.17462	0.679555	10.1403	0.00199511	0.0942314	up			1.58949	3.50259	11.3997	0.00169531	0.107604	up
ENSG00000198113.2	NM_017723.2	TOR4A	54863			0.559367	0.404253	10.1353	0.00199995	0.0942314	up			0.698371	4.58196	9.01289	0.00469979	0.187306	up
ENSG00000162889.6	NM_004759.4	MAPKAPK2	9261			0.361625	4.24974	10.133	0.0020022	0.0942314	up			1.02945	-0.197475	6.25737	0.0167543	0.346683	up
ENSG00000254415.3	NM_001098612.1	SIGLEC14	100049587			0.995434	-0.200848	9.9569	0.00218173	0.0990523	up			1.28615	2.69825	6.10183	0.0180665	0.358875	up
ENSG00000125148.6	NM_005953.3	MT2A	4502			0.573069	4.08169	9.9564	0.00218226	0.0990523	up			0.992644	9.01037	8.39852	0.00617985	0.216134	up
ENSG00000134070.4	NM_001570.3	IRAK2	3656			0.352811	2.92453	9.94008	0.00219972	0.0995685	up			0.503533	3.59259	6.18904	0.0173177	0.351798	up
ENSG00000105281.8	NM_005628.2	SLC1A5	6510			0.744019	0.928214	9.91406	0.00222787	0.0999545	up			1.34334	1.8571	15.4221	0.000347046	0.0457494	up
ENSG00000163884.3	NM_014079.3	KLF15	28999			0.374425	3.80391	9.88708	0.00225744	0.100789	up			0.562998	7.18633	8.31947	0.00640379	0.219487	up
ENSG00000106366.7	NM_000602.4	SERPINE1	5054			1.26273	0.818563	9.87709	0.0022685	0.101038	up			2.19755	4.35968	22.8176	2.61532e-05	0.00986029	up
ENSG00000064300.4	NM_002507.3	NGFR	4804			0.967493	1.31195	9.7922	0.0023647	0.10303	up			0.949787	4.69165	8.94435	0.00484435	0.192255	up
ENSG00000132109.8	NM_003141.3	TRIM21	6737			0.510224	1.80104	9.73653	0.00243007	0.104806	up			0.685379	4.39785	6.19483	0.0172692	0.351556	up
ENSG00000129667.8	NM_024599.5	RHBDF2	79651			0.620792	2.59059	9.65231	0.00253257	0.106121	up			2.01809	-1.33287	9.35863	0.00461108	0.184551	up
ENSG00000145248.6	NM_152679.3	SLC10A4	201780			-0.455048	1.10581	9.4991	0.00273064	0.110872	down			-1.1865	4.69239	8.65335	0.00551309	0.20449	down
ENSG00000136167.9	NM_002298.4	LCP1	3936			0.642571	3.38756	9.44934	0.00279837	0.112505	up			1.40859	5.76734	15.5312	0.000333097	0.0448515	up
ENSG00000205502.3	NM_001007595.2	C2CD4B	388125			1.02039	-0.996195	9.32453	0.00297602	0.115532	up			1.75219	3.2191	11.5228	0.00161126	0.103312	up
ENSG00000143772.5	NM_002221.3	ITPKB	3707			0.438106	6.75278	9.31017	0.00299719	0.116077	up			0.601285	10.4465	7.82292	0.00802454	0.241673	up
ENSG00000170476.11	NM_016459.3	MZB1	51237			0.96831	-2.52545	9.24595	0.00309383	0.117868	up			2.71347	-0.194278	11.5942	0.00156457	0.101353	up
ENSG00000100739.6	NM_000710.3	BDKRB1	623			0.763513	-2.21666	9.23863	0.00310504	0.11802	up			1.30979	-0.715392	7.0162	0.0116682	0.290949	up
ENSG00000112299.7	NM_004666.2	VNN1	8876			0.914108	-1.9944	9.17339	0.0032069	0.120355	up			1.62079	0.508313	12.5796	0.00104794	0.0813347	up
ENSG00000184497.8	NM_182614.2	TMEM255B	348013			0.490404	-1.37303	9.1002	0.00332529	0.121853	up			1.45288	2.60451	41.905	1.23237e-07	0.000543971	up
ENSG00000163840.5	NM_138287.3	DTX3L	151636			0.564642	3.67556	9.0787	0.00336093	0.122211	up			0.690606	6.21517	5.95076	0.0194478	0.367667	up
ENSG00000047457.9	NM_000096.3	CP	1356			1.16256	2.75262	8.9817	0.00352671	0.125396	up			1.87417	4.41838	9.13841	0.00444685	0.182133	up
ENSG00000130202.5	NM_001042724.1	PVRL2	5819			0.315779	3.47873	8.96108	0.00356302	0.126194	up			0.659713	4.0501	5.96849	0.01928	0.365861	up
ENSG00000187193.8	NM_005952.3	MT1X	4501			0.628237	3.45613	8.92402	0.00362928	0.127574	up			1.52994	7.54986	22.2398	3.15974e-05	0.0115807	up
ENSG00000153902.9	NM_139284.2	LGI4	163175			0.234583	5.02327	8.9194	0.00363762	0.12773	up			0.644811	8.16215	7.47388	0.0094239	0.26436	up
ENSG00000105639.14	NM_000215.3	JAK3	3718			0.349889	3.23283	8.90134	0.00367046	0.12847	up			1.02731	4.33831	24.8671	1.35798e-05	0.00670952	up
ENSG00000172578.7	NM_130446.2	KLHL6	89857			0.684313	1.35043	8.84152	0.00378139	0.129717	up			1.60579	1.9381	17.8928	0.000140221	0.028994	up
ENSG00000101336.8	NM_001172132.1	HCK	3055			0.569008	2.09912	8.81206	0.0038373	0.130843	up			1.55555	-1.26723	6.00627	0.0189275	0.364373	up
ENSG00000043462.7	NM_005565.4	LCP2	3937			0.406978	2.32206	8.80066	0.00385916	0.131091	up			1.08296	4.60898	13.1113	0.000847502	0.0726194	up
ENSG00000167208.10	NM_182854.3	SNX20	124460			0.706326	-0.524238	8.74613	0.00396555	0.131823	up			1.97527	1.97586	15.8925	0.000290977	0.0425875	up
ENSG00000131095.7	NM_001242376.1	GFAP	2670			0.563783	10.7962	8.70412	0.00404959	0.133419	up			1.47752	0.517536	16.1259	0.000266794	0.0402347	up

## Sheet: ASD common Reactome enrichments
	Cluster	direction	ID	Description	GeneRatio	BgRatio	pvalue	p.adjust	qvalue	geneID	Count
1	down	down	R-HSA-2559583	Cellular Senescence	2021-02-02	197/10704	0.000337032	0.0114591	0.00070954	ETS2/ANAPC15	2
2	down	down	R-HSA-176407	Conversion from APC/C:Cdc20 to APC/C:Cdh1 in late anaphase	2021-02-01	20/10704	0.0037336	0.0206098	0.00127615	ANAPC15	1
3	down	down	R-HSA-176412	Phosphorylation of the APC/C	2021-02-01	20/10704	0.0037336	0.0206098	0.00127615	ANAPC15	1
4	down	down	R-HSA-9687136	Aberrant regulation of mitotic exit in cancer due to RB1 defects	2021-02-01	20/10704	0.0037336	0.0206098	0.00127615	ANAPC15	1
5	down	down	R-HSA-141405	Inhibition of the proteolytic activity of APC/C required for the onset of anaphase by mitotic spindle checkpoint components	2021-02-01	21/10704	0.0039201	0.0206098	0.00127615	ANAPC15	1
6	down	down	R-HSA-141430	Inactivation of APC/C via direct inhibition of the APC/C complex	2021-02-01	21/10704	0.0039201	0.0206098	0.00127615	ANAPC15	1
7	down	down	R-HSA-174048	APC/C:Cdc20 mediated degradation of Cyclin B	2021-02-01	24/10704	0.00447949	0.0206098	0.00127615	ANAPC15	1
8	down	down	R-HSA-179409	APC-Cdc20 mediated degradation of Nek2A	2021-02-01	26/10704	0.00485232	0.0206098	0.00127615	ANAPC15	1
9	down	down	R-HSA-2559585	Oncogene Induced Senescence	2021-02-01	33/10704	0.0061567	0.0206098	0.00127615	ETS2	1
10	down	down	R-HSA-9675126	Diseases of mitotic cell cycle	2021-02-01	36/10704	0.00671546	0.0206098	0.00127615	ANAPC15	1
11	down	down	R-HSA-9687139	Aberrant regulation of mitotic cell cycle due to RB1 defects	2021-02-01	36/10704	0.00671546	0.0206098	0.00127615	ANAPC15	1
12	down	down	R-HSA-8853884	Transcriptional Regulation by VENTX	2021-02-01	39/10704	0.00727406	0.0206098	0.00127615	ANAPC15	1
13	down	down	R-HSA-174084	Autodegradation of Cdh1 by Cdh1:APC/C	2021-02-01	64/10704	0.011923	0.0239863	0.00148522	ANAPC15	1
14	down	down	R-HSA-174154	APC/C:Cdc20 mediated degradation of Securin	2021-02-01	68/10704	0.0126658	0.0239863	0.00148522	ANAPC15	1
15	down	down	R-HSA-174184	Cdc20:Phospho-APC/C mediated degradation of Cyclin A	2021-02-01	73/10704	0.0135939	0.0239863	0.00148522	ANAPC15	1
16	down	down	R-HSA-69017	CDK-mediated phosphorylation and removal of Cdc6	2021-02-01	73/10704	0.0135939	0.0239863	0.00148522	ANAPC15	1
17	down	down	R-HSA-174178	APC/C:Cdh1 mediated degradation of Cdc20 and other APC/C:Cdh1 targeted proteins in late mitosis/early G1	2021-02-01	74/10704	0.0137795	0.0239863	0.00148522	ANAPC15	1
18	down	down	R-HSA-179419	APC:Cdc20 mediated degradation of cell cycle proteins prior to satisfation of the cell cycle checkpoint	2021-02-01	74/10704	0.0137795	0.0239863	0.00148522	ANAPC15	1
19	down	down	R-HSA-176409	APC/C:Cdc20 mediated degradation of mitotic proteins	2021-02-01	76/10704	0.0141505	0.0239863	0.00148522	ANAPC15	1
20	down	down	R-HSA-176814	Activation of APC/C and APC/C:Cdc20 mediated degradation of mitotic proteins	2021-02-01	77/10704	0.0143361	0.0239863	0.00148522	ANAPC15	1
21	down	down	R-HSA-176408	Regulation of APC/C activators between G1/S and early anaphase	2021-02-01	81/10704	0.015078	0.0239863	0.00148522	ANAPC15	1
22	down	down	R-HSA-174143	APC/C-mediated degradation of cell cycle proteins	2021-02-01	88/10704	0.0163756	0.0239863	0.00148522	ANAPC15	1
23	down	down	R-HSA-453276	Regulation of mitotic cell cycle	2021-02-01	88/10704	0.0163756	0.0239863	0.00148522	ANAPC15	1
24	down	down	R-HSA-69052	Switching of origins to a post-replicative state	2021-02-01	91/10704	0.0169315	0.0239863	0.00148522	ANAPC15	1
25	down	down	R-HSA-2559582	Senescence-Associated Secretory Phenotype (SASP)	2021-02-01	112/10704	0.0208182	0.0274656	0.00170066	ANAPC15	1
26	down	down	R-HSA-69618	Mitotic Spindle Checkpoint	2021-02-01	113/10704	0.0210031	0.0274656	0.00170066	ANAPC15	1
27	down	down	R-HSA-69239	Synthesis of DNA	2021-02-01	120/10704	0.0222969	0.0280776	0.00173855	ANAPC15	1
28	down	down	R-HSA-69306	DNA Replication	2021-02-01	128/10704	0.0237744	0.0288689	0.00178755	ANAPC15	1
29	down	down	R-HSA-69242	S Phase	2021-02-01	162/10704	0.0300414	0.0352209	0.00218086	ANAPC15	1
30	down	down	R-HSA-2467813	Separation of Sister Chromatids	2021-02-01	191/10704	0.0353708	0.0400869	0.00248216	ANAPC15	1
31	down	down	R-HSA-68882	Mitotic Anaphase	2021-02-01	236/10704	0.0436116	0.0465314	0.0028812	ANAPC15	1
32	down	down	R-HSA-2555396	Mitotic Metaphase and Anaphase	2021-02-01	237/10704	0.0437943	0.0465314	0.0028812	ANAPC15	1
33	up	up	R-HSA-6785807	Interleukin-4 and Interleukin-13 signaling	1993-10-01	108/10704	2.88243e-08	1.00308e-05	9.40581e-06	IL1B/ICAM1/HMOX1/CCL2/CEBPD/CXCL8/SOCS3/MYC/TIMP1/JAK3	10
34	up	up	R-HSA-6783783	Interleukin-10 signaling	1993-07-01	47/10704	1.40931e-07	2.4522e-05	2.2994e-05	IL1B/ICAM1/CD80/CCL2/CXCL8/CXCL10/TIMP1	7
35	up	up	R-HSA-449147	Signaling by Interleukins	17/93	461/10704	3.7558e-07	4.35673e-05	4.08526e-05	IL1B/ICAM1/HMOX1/CD80/CCL2/CEBPD/CXCL8/SOCS3/MYC/CXCL10/TIMP1/CSF2RB/MAPKAPK2/IRAK2/LCP1/JAK3/HCK	17
36	up	up	R-HSA-166663	Initial triggering of complement	1993-05-01	23/10704	1.32093e-06	0.000114921	0.00010776	C1QB/C1QC/C1R/C2/C4B	5
37	up	up	R-HSA-977606	Regulation of Complement cascade	1993-06-01	47/10704	2.94633e-06	0.000205065	0.000192287	C1QB/C5AR1/C1QC/C1R/C2/C4B	6
38	up	up	R-HSA-166658	Complement cascade	1993-06-01	58/10704	1.02863e-05	0.000596603	0.000559428	C1QB/C5AR1/C1QC/C1R/C2/C4B	6
39	up	up	R-HSA-877300	Interferon gamma signaling	1993-07-01	91/10704	1.33036e-05	0.000645773	0.000605534	ICAM1/GBP2/IFI30/SOCS3/GBP1/MT2A/TRIM21	7
40	up	up	R-HSA-6798695	Neutrophil degranulation	15/93	480/10704	1.48454e-05	0.000645773	0.000605534	PLAUR/CHI3L1/SIGLEC9/C5AR1/LRG1/SERPINA3/S100A11/HK3/GPR84/SLC11A1/PNP/RNASE2/NBEAL2/SIGLEC14/VNN1	15
41	up	up	R-HSA-166786	Creation of C4 and C2 activators	1993-03-01	14/10704	0.000215636	0.00833792	0.00781837	C1QB/C1QC/C1R	3
42	up	up	R-HSA-114608	Platelet degranulation	1993-06-01	129/10704	0.000882636	0.0307157	0.0288018	THBS1/SERPINA3/TIMP1/PLEK/TOR4A/SERPINE1	6
43	up	up	R-HSA-76005	Response to elevated platelet cytosolic Ca2+	1993-06-01	134/10704	0.00107591	0.0340378	0.0319168	THBS1/SERPINA3/TIMP1/PLEK/TOR4A/SERPINE1	6
44	up	up	R-HSA-380108	Chemokine receptors bind chemokines	1993-04-01	59/10704	0.00168725	0.0454456	0.0426139	CCL2/CXCL8/CXCL3/CXCL10	4
45	up	up	R-HSA-913531	Interferon Signaling	1993-07-01	199/10704	0.00169768	0.0454456	0.0426139	ICAM1/GBP2/IFI30/SOCS3/GBP1/MT2A/TRIM21	7
46	up	up	R-HSA-76002	Platelet activation, signaling and aggregation	1993-08-01	263/10704	0.00200574	0.0498571	0.0467504	THBS1/SERPINA3/RAC2/TIMP1/PLEK/TOR4A/SERPINE1/LCP2	8

## Sheet: TS common Reactome enrichments
	Cluster	direction	ID	Description	GeneRatio	BgRatio	pvalue	p.adjust	qvalue	geneID	Count
1	down	down	R-HSA-211945	Phase I - Functionalization of compounds	2021-01-01	49/6937	0.00706357	0.0141271	NA	EPHX1	1
2	down	down	R-HSA-211859	Biological oxidations	2021-01-01	108/6937	0.0155687	0.0155687	NA	EPHX1	1
3	up	up	R-HSA-6785807	Interleukin-4 and Interleukin-13 signaling	1994-10-01	72/6937	3.44841e-08	6.39018e-06	5.93736e-06	IL1B/ICAM1/HMOX1/CCL2/CEBPD/CXCL8/SOCS3/MYC/TIMP1/JAK3	10
4	up	up	R-HSA-6783783	Interleukin-10 signaling	1994-07-01	26/6937	3.56993e-08	6.39018e-06	5.93736e-06	IL1B/ICAM1/CD80/CCL2/CXCL8/CXCL10/TIMP1	7
5	up	up	R-HSA-166663	Initial triggering of complement	1994-05-01	6937-10-01	9.80621e-08	1.11057e-05	1.03188e-05	C1QB/C1QC/C1R/C2/C4B	5
6	up	up	R-HSA-977606	Regulation of Complement cascade	1994-06-01	19/6937	1.24086e-07	1.11057e-05	1.03188e-05	C1QB/C5AR1/C1QC/C1R/C2/C4B	6
7	up	up	R-HSA-449147	Signaling by Interleukins	17/94	282/6937	1.73917e-07	1.24524e-05	1.157e-05	IL1B/ICAM1/HMOX1/CD80/CCL2/CEBPD/CXCL8/SOCS3/MYC/CXCL10/TIMP1/CSF2RB/MAPKAPK2/IRAK2/LCP1/JAK3/HCK	17
8	up	up	R-HSA-166658	Complement cascade	1994-06-01	22/6937	3.30234e-07	1.97039e-05	1.83077e-05	C1QB/C5AR1/C1QC/C1R/C2/C4B	6
9	up	up	R-HSA-877300	Interferon gamma signaling	1994-07-01	60/6937	1.44084e-05	0.000736885	0.000684668	ICAM1/GBP2/IFI30/SOCS3/GBP1/MT2A/TRIM21	7
10	up	up	R-HSA-6798695	Neutrophil degranulation	15/94	337/6937	4.06317e-05	0.00181827	0.00168942	PLAUR/CHI3L1/SIGLEC9/C5AR1/LRG1/SERPINA3/S100A11/HK3/GPR84/SLC11A1/PNP/RNASE2/NBEAL2/SIGLEC14/VNN1	15
11	up	up	R-HSA-109582	Hemostasis	15/94	409/6937	0.000353577	0.0140645	0.0130679	SELE/TNFRSF10D/PLAUR/JCHAIN/THBS1/KIF20A/KIFC1/SERPINA5/SERPINA3/RAC2/TIMP1/PLEK/TOR4A/SERPINE1/LCP2	15
12	up	up	R-HSA-380108	Chemokine receptors bind chemokines	1994-04-01	33/6937	0.000957619	0.0342828	0.0318534	CCL2/CXCL8/CXCL3/CXCL10	4
13	up	up	R-HSA-114608	Platelet degranulation	1994-06-01	93/6937	0.0015588	0.0476578	0.0442807	THBS1/SERPINA3/TIMP1/PLEK/TOR4A/SERPINE1	6
14	up	up	R-HSA-913531	Interferon Signaling	1994-07-01	127/6937	0.00159747	0.0476578	0.0442807	ICAM1/GBP2/IFI30/SOCS3/GBP1/MT2A/TRIM21	7

## Sheet: ASD common KEGG enrichments
	Cluster	direction	ID	Description	GeneRatio	BgRatio	pvalue	p.adjust	qvalue	geneID	Count
1	down	down	hsa05166	Human T-cell leukemia virus 1 infection	2021-01-01	219/8087	0.0270805	0.028688	NA	2114	1
2	down	down	hsa04014	Ras signaling pathway	2021-01-01	232/8087	0.028688	0.028688	NA	2114	1
3	up	up	hsa04610	Complement and coagulation cascades	1978-10-01	85/8087	6.7427e-09	1.17323e-06	8.87198e-07	5329/713/728/714/715/5104/717/721/5054/623	10
4	up	up	hsa04668	TNF signaling pathway	1978-09-01	112/8087	1.11363e-06	9.68856e-05	7.32649e-05	3553/6401/3383/6347/2921/9021/197259/3627/8837	9
5	up	up	hsa05144	Malaria	1978-06-01	50/8087	7.51489e-06	0.000329601	0.000249245	3553/6401/3383/7057/6347/3576	6
6	up	up	hsa05133	Pertussis	1978-07-01	76/8087	7.57704e-06	0.000329601	0.000249245	3553/713/714/3576/715/717/721	7
7	up	up	hsa05150	Staphylococcus aureus infection	1978-07-01	96/8087	3.54105e-05	0.00123229	0.000931856	3383/713/728/714/715/717/721	7
8	up	up	hsa05142	Chagas disease	1978-07-01	102/8087	5.23855e-05	0.00147503	0.00111542	3553/713/714/6347/3576/8837/5054	7
9	up	up	hsa04064	NF-kappa B signaling pathway	1978-07-01	104/8087	5.93403e-05	0.00147503	0.00111542	3553/10912/3383/3576/2921/4616/8837	7
10	up	up	hsa05171	Coronavirus disease - COVID-19	1978-10-01	232/8087	7.07265e-05	0.0015383	0.00116326	3553/713/728/714/6347/3576/715/3627/717/721	10
11	up	up	hsa04060	Cytokine-cytokine receptor interaction	1978-11-01	295/8087	0.000111053	0.00208175	0.00157422	3553/8793/4982/6347/3576/2921/3627/8794/1439/51330/4804	11
12	up	up	hsa04218	Cellular senescence	1978-08-01	156/8087	0.000119641	0.00208175	0.00157422	10912/3576/4609/4616/1978/9133/9261/5054	8
13	up	up	hsa05323	Rheumatoid arthritis	1978-06-01	93/8087	0.000259593	0.00410629	0.00310518	3553/3383/941/6347/3576/2921	6
14	up	up	hsa05322	Systemic lupus erythematosus	1978-07-01	136/8087	0.000318685	0.00462094	0.00349436	713/714/941/715/717/721/6737	7
15	up	up	hsa04061	Viral protein interaction with cytokine and cytokine receptor	1978-06-01	100/8087	0.000384882	0.00478353	0.00361731	8793/6347/3576/2921/3627/8794	6
16	up	up	hsa04933	AGE-RAGE signaling pathway in diabetic complications	1978-06-01	100/8087	0.000384882	0.00478353	0.00361731	3553/6401/3383/6347/3576/5054	6
17	up	up	hsa04115	p53 signaling pathway	1978-05-01	73/8087	0.000660308	0.00765957	0.00579217	10912/7057/4616/9133/5054	5
18	up	up	hsa04657	IL-17 signaling pathway	1978-05-01	94/8087	0.0020623	0.0220587	0.0166808	3553/6347/3576/2921/3627	5
19	up	up	hsa05418	Fluid shear stress and atherosclerosis	1978-06-01	139/8087	0.00215516	0.0220587	0.0166808	3553/6401/3383/3162/6347/5880	6
20	up	up	hsa04666	Fc gamma R-mediated phagocytosis	1978-05-01	97/8087	0.00236766	0.0222239	0.0168057	85477/3985/7408/5880/3055	5
21	up	up	hsa04062	Chemokine signaling pathway	1978-07-01	192/8087	0.00242675	0.0222239	0.0168057	6347/3576/2921/3627/5880/3718/3055	7
22	up	up	hsa04066	HIF-1 signaling pathway	1978-05-01	109/8087	0.0039247	0.0341449	0.0258204	3162/3101/7076/1978/5054	5
23	up	up	hsa05230	Central carbon metabolism in cancer	1978-04-01	70/8087	0.00453678	0.0375905	0.028426	4609/5224/3101/6510	4
24	up	up	hsa05143	African trypanosomiasis	1978-03-01	37/8087	0.0052986	0.040085	0.0303123	3553/6401/3383	3
25	up	up	hsa05216	Thyroid cancer	1978-03-01	37/8087	0.0052986	0.040085	0.0303123	10912/4609/4616	3
26	up	up	hsa05164	Influenza A	1978-06-01	171/8087	0.00598448	0.0433875	0.0328096	3553/3383/6347/3576/9021/3627	6
27	up	up	hsa05219	Bladder cancer	1978-03-01	41/8087	0.00707186	0.0478604	0.0361921	7057/3576/4609	3
28	up	up	hsa04010	MAPK signaling pathway	1978-08-01	294/8087	0.00715156	0.0478604	0.0361921	3553/10912/3315/4609/4616/5880/9261/4804	8

## Sheet: TS common KEGG enrichments
	Cluster	direction	ID	Description	GeneRatio	BgRatio	pvalue	p.adjust	qvalue	geneID	Count
1	down	down	hsa05204	Chemical carcinogenesis	2021-01-01	31/5063	0.00612285	0.00977681	NA	2052	1
2	down	down	hsa00980	Metabolism of xenobiotics by cytochrome P450	2021-01-01	33/5063	0.00651787	0.00977681	NA	2052	1
3	down	down	hsa04976	Bile secretion	2021-01-01	50/5063	0.00987557	0.00987557	NA	2052	1
4	up	up	hsa04610	Complement and coagulation cascades	1978-10-01	40/5063	2.43783e-10	4.19306e-08	3.13068e-08	5329/713/728/714/715/5104/717/721/5054/623	10
5	up	up	hsa04668	TNF signaling pathway	1978-09-01	73/5063	1.33999e-06	0.000115239	8.60417e-05	3553/6401/3383/6347/2921/9021/197259/3627/8837	9
6	up	up	hsa05150	Staphylococcus aureus infection	1978-07-01	46/5063	5.18271e-06	0.000297142	0.000221856	3383/713/728/714/715/717/721	7
7	up	up	hsa05144	Malaria	1978-06-01	32/5063	7.25412e-06	0.000311927	0.000232896	3553/6401/3383/7057/6347/3576	6
8	up	up	hsa05133	Pertussis	1978-07-01	50/5063	9.2056e-06	0.000316673	0.000236439	3553/713/714/3576/715/717/721	7
9	up	up	hsa04060	Cytokine-cytokine receptor interaction	1978-11-01	152/5063	1.70954e-05	0.0004877	0.000364134	3553/8793/4982/6347/3576/2921/3627/8794/1439/51330/4804	11
10	up	up	hsa04064	NF-kappa B signaling pathway	1978-07-01	56/5063	1.98483e-05	0.0004877	0.000364134	3553/10912/3383/3576/2921/4616/8837	7
11	up	up	hsa05142	Chagas disease	1978-07-01	68/5063	7.15503e-05	0.00153833	0.00114857	3553/713/714/6347/3576/8837/5054	7
12	up	up	hsa05171	Coronavirus disease - COVID-19	1978-10-01	149/5063	8.14443e-05	0.00155649	0.00116213	3553/713/728/714/6347/3576/715/3627/717/721	10
13	up	up	hsa04061	Viral protein interaction with cytokine and cytokine receptor	1978-06-01	52/5063	0.000127595	0.00219464	0.00163859	8793/6347/3576/2921/3627/8794	6
14	up	up	hsa05322	Systemic lupus erythematosus	1978-07-01	76/5063	0.000146196	0.00228597	0.00170678	713/714/941/715/717/721/6737	7
15	up	up	hsa04218	Cellular senescence	1978-08-01	103/5063	0.000161317	0.00231221	0.00172637	10912/3576/4609/4616/1978/9133/9261/5054	8
16	up	up	hsa05323	Rheumatoid arthritis	1978-06-01	56/5063	0.000193787	0.00256395	0.00191433	3553/3383/941/6347/3576/2921	6
17	up	up	hsa04933	AGE-RAGE signaling pathway in diabetic complications	1978-06-01	71/5063	0.000711817	0.00874518	0.00652945	3553/6401/3383/6347/3576/5054	6
18	up	up	hsa04657	IL-17 signaling pathway	1978-05-01	48/5063	0.000778133	0.00892259	0.00666191	3553/6347/3576/2921/3627	5
19	up	up	hsa04115	p53 signaling pathway	1978-05-01	51/5063	0.00102978	0.0110701	0.00826533	10912/7057/4616/9133/5054	5
20	up	up	hsa04666	Fc gamma R-mediated phagocytosis	1978-05-01	60/5063	0.00214961	0.021749	0.0162386	85477/3985/7408/5880/3055	5
21	up	up	hsa04062	Chemokine signaling pathway	1978-07-01	124/5063	0.00278853	0.0262393	0.0195911	6347/3576/2921/3627/5880/3718/3055	7
22	up	up	hsa05418	Fluid shear stress and atherosclerosis	1978-06-01	93/5063	0.00289852	0.0262393	0.0195911	3553/6401/3383/3162/6347/5880	6
23	up	up	hsa04621	NOD-like receptor signaling pathway	1978-06-01	98/5063	0.00376687	0.0323951	0.0241873	3553/2634/6347/3576/2921/2633	6
24	up	up	hsa05143	African trypanosomiasis	1978-03-01	22/5063	0.00438748	0.0359356	0.0268307	3553/6401/3383	3
25	up	up	hsa05230	Central carbon metabolism in cancer	1978-04-01	47/5063	0.00562947	0.0440122	0.032861	4609/5224/3101/6510	4
26	up	up	hsa05216	Thyroid cancer	1978-03-01	25/5063	0.00633925	0.0454481	0.0339331	10912/4609/4616	3
27	up	up	hsa05164	Influenza A	1978-06-01	109/5063	0.0063416	0.0454481	0.0339331	3553/3383/6347/3576/9021/3627	6
28	up	up	hsa04066	HIF-1 signaling pathway	1978-05-01	78/5063	0.00670301	0.0461167	0.0344323	3162/3101/7076/1978/5054	5
