# Supplementary material for: Brain Transcriptome of Autism Spectrum Disorders and Tourette Syndrome Defines Common Targetable Inflammatory Pathways Involving Cytokines, Complement, and Kinase Signalling
Source: Research Square preprint supplement (doi:10.21203/rs.3.rs-885680/v1), 2021-09-21
Supplement: Supplementary file 2 [file eff90c087c6aca89b7e82212.xlsx]

## Sheet: Differentially Expressed Genes
	seqnames	start	end	width	strand	tx_id	tx_name	symbol	ENTREZID	logFC	logCPM	F	PValue	FDR	direction
NM_174918.2	chr19	7741943	7744719	2777	+	48719	NM_174918.2	MCEMP1	199675	4.4952	0.854085	71.9143	2.52305e-10	4.7562e-06	up
NM_002965.3	chr1	153330330	153333503	3174	+	1781	NM_002965.3	S100A9	6280	2.87328	5.83559	44.9525	5.94233e-08	0.000543971	up
NM_182614.2	chr13	114462216	114514899	52684	+	37513	NM_182614.2	TMEM255B	348013	1.45288	2.60451	41.905	1.23237e-07	0.000543971	up
NM_000578.3	chr2	219246752	219261617	14866	+	7448	NM_000578.3	SLC11A1	6556	2.08115	3.69131	41.8345	1.25377e-07	0.000543971	up
NM_016354.3	chr20	61273797	61303647	29851	+	52974	NM_016354.3	SLCO4A1	28231	3.30927	7.15263	41.2617	1.44282e-07	0.000543971	up
NM_000624.5	chr14	95047706	95059457	11752	+	38844	NM_000624.5	SERPINA5	5104	3.16909	3.78064	40.2482	1.85466e-07	0.000582703	up
NM_001565.3	chr4	76942269	76944689	2421	-	14576	NM_001565.3	CXCL10	3627	6.11324	5.34645	36.0703	5.41779e-07	0.00140063	up
NM_005720.3	chr7	98972298	98992424	20127	+	21665	NM_005720.3	ARPC1B	10095	1.20493	6.602	35.5383	6.23825e-07	0.00140063	up
NM_000450.2	chr1	169691781	169703220	11440	-	5118	NM_000450.2	SELE	6401	4.44543	4.28722	35.2777	6.68702e-07	0.00140063	up
NM_000064.3	chr19	6677846	6720693	42848	-	50633	NM_000064.3	C3	718	2.30001	8.95054	34.1964	8.94558e-07	0.00152556	up
NM_003955.4	chr17	76352858	76356160	3303	-	47456	NM_003955.4	SOCS3	9021	3.37702	7.00562	33.8766	9.75809e-07	0.00152556	up
NM_015474.3	chr20	35520227	35580246	60020	-	53454	NM_015474.3	SAMHD1	25939	1.07753	6.68333	33.3577	1.12462e-06	0.00152556	up
NM_052972.2	chr19	4537227	4540036	2810	-	50569	NM_052972.2	LRG1	116844	3.24587	1.67093	33.2055	1.17268e-06	0.00152556	up
NM_001085.4	chr14	95078714	95090390	11677	+	38845	NM_001085.4	SERPINA3	12	3.33463	8.49702	33.1265	1.19846e-06	0.00152556	up
NM_025194.2	chr19	41223008	41246765	23758	+	49573	NM_025194.2	ITPKC	80271	1.03759	5.52528	32.8794	1.28305e-06	0.00152556	up
NR_131925.1	chr1	211813150	211827964	14815	+	2612	NR_131925.1	LINC01693	105748977	3.89986	-0.357847	36.1373	1.29484e-06	0.00152556	up
NM_014358.3	chr12	8685901	8693558	7658	-	35710	NM_014358.3	CLEC4E	26253	2.47446	2.37143	31.3953	1.94298e-06	0.00214936	up
NM_007286.5	chr5	150020207	150038792	18586	+	16318	NM_007286.5	SYNPO	11346	0.77777	6.32348	31.2019	2.05233e-06	0.00214936	up
NM_021175.3	chr19	35773249	35776046	2798	+	49316	NM_021175.3	HAMP	57817	2.41751	3.79445	29.238	3.6126e-06	0.00344771	up
NM_020406.3	chr19	43857811	43867324	9514	+	49649	NM_020406.3	CD177	57126	2.87229	0.755098	29.1954	3.65785e-06	0.00344771	up
NM_032827.6	chr2	85980909	86018506	37598	+	6426	NM_032827.6	ATOH8	84913	1.41373	5.91049	28.2633	4.81433e-06	0.00432166	up
NM_000576.2	chr2	113587337	113594356	7020	-	8779	NM_000576.2	IL1B	3553	3.61946	3.14043	28.0211	5.17404e-06	0.00443345	up
NM_005178.4	chr19	45251978	45263301	11324	+	49710	NM_005178.4	BCL3	602	1.90364	5.11148	27.6461	5.78776e-06	0.00474169	up
NM_001278655.1	chr20	48884023	48896332	12310	+	52833	NM_001278655.1	LINC01272	NA	3.04411	0.190583	27.4261	6.18339e-06	0.00474169	up
NM_005621.1	chr1	153346184	153348075	1892	-	4664	NM_005621.1	S100A12	6283	2.90234	2.78143	27.3701	6.28839e-06	0.00474169	up
NR_002798.1	chr19	50837057	50848005	10949	-	51739	NR_002798.1	NAPSB	256236	2.32608	3.77885	27.1572	6.70574e-06	0.00483561	up
NM_002982.3	chr17	32582296	32584222	1927	+	44950	NM_002982.3	CCL2	6347	3.11727	4.81939	27.0504	6.92597e-06	0.00483561	up
NM_006332.4	chr19	18284590	18288934	4345	+	49064	NM_006332.4	IFI30	10437	1.93888	5.00841	26.6887	7.73007e-06	0.00520427	up
NM_003890.2	chr19	40353963	40440533	86571	-	51318	NM_003890.2	FCGBP	8857	2.73483	5.58402	26.5509	8.06192e-06	0.00524053	up
NM_017506.1	chr19	14937139	14939276	2138	-	50906	NM_017506.1	OR7A5	26659	2.24701	2.37346	26.3539	8.56251e-06	0.00538039	up
NM_014505.5	chr12	70760062	70828072	68011	+	34984	NM_014505.5	KCNMB4	27345	0.622991	8.56335	26.2099	8.94935e-06	0.00544207	up
NM_001972.3	chr19	852209	856246	4038	+	48507	NM_001972.3	ELANE	1991	-3.96942	0.329962	25.9324	9.74711e-06	0.00546292	down
NM_003004.2	chr17	80278900	80291921	13022	-	47582	NM_003004.2	SECTM1	6398	1.86249	2.63433	25.905	9.82998e-06	0.00546292	up
NM_000201.2	chr19	10381517	10397291	15775	+	48807	NM_000201.2	ICAM1	3383	1.76925	5.94355	25.8974	9.85301e-06	0.00546292	up
NM_000491.4	chr1	22979474	22988130	8657	+	390	NM_000491.4	C1QB	713	2.0917	7.88999	25.107	1.25963e-05	0.00664112	up
NM_004417.3	chr5	172195093	172198203	3111	-	17696	NM_004417.3	DUSP1	1843	-1.277	8.73335	25.0851	1.26826e-05	0.00664112	down
NR_135116.1	chr1	230138464	230142909	4446	+	2802	NR_135116.1	LINC01736	101927532	1.575	3.03663	24.9467	1.32449e-05	0.00670952	up
NM_000215.3	chr19	17935591	17958841	23251	-	50968	NM_000215.3	JAK3	3718	1.02731	4.33831	24.8671	1.35798e-05	0.00670952	up
NM_003064.3	chr20	43880880	43883205	2326	-	53520	NM_003064.3	SLPI	6590	1.80177	1.1247	24.7973	1.3881e-05	0.00670952	up
NM_002934.2	chr14	21423630	21424594	965	+	38161	NM_002934.2	RNASE2	6036	2.86776	2.34505	24.4658	1.54112e-05	0.00701836	up
NM_005022.3	chr17	4848945	4852381	3437	-	46088	NM_005022.3	PFN1	5216	0.43282	8.66403	24.4477	1.54994e-05	0.00701836	up
NM_181449.2	chr17	72606022	72619897	13876	-	47314	NM_181449.2	CD300E	342510	3.6888	0.797719	24.4198	1.56369e-05	0.00701836	up
NM_002198.2	chr5	131817301	131826465	9165	-	17292	NM_002198.2	IRF1	3659	1.86088	5.78119	24.1636	1.69611e-05	0.00743565	up
NM_002467.4	chr8	128748315	128753680	5366	+	24371	NM_002467.4	MYC	4609	1.48261	3.31848	23.9295	1.82744e-05	0.00770955	up
NM_000270.3	chr14	20937538	20946165	8628	+	38147	NM_000270.3	PNP	4860	1.2928	5.89746	23.9074	1.84038e-05	0.00770955	up
NM_005860.2	chr19	676389	683392	7004	+	48495	NM_005860.2	FSTL3	10272	0.78993	4.8796	23.7654	1.92585e-05	0.00789223	up
NM_018154.2	chr19	14230321	14247440	17120	-	50884	NM_018154.2	ASF1B	55723	1.82987	1.16937	23.3771	2.18179e-05	0.00869315	up
NM_005282.2	chr19	46093022	46105466	12445	-	51517	NM_005282.2	GPR4	2828	1.98314	5.99958	23.3105	2.2291e-05	0.00869315	up
NR_033909.1	chr14	21387500	21388335	836	+	38160	NR_033909.1	ECRP	643332	3.44397	-0.160165	23.2684	2.25964e-05	0.00869315	up
NM_000602.4	chr7	100770370	100782547	12178	+	21770	NM_000602.4	SERPINE1	5054	2.19755	4.35968	22.8176	2.61532e-05	0.00986029	up
NM_005952.3	chr16	56716382	56718108	1727	+	42819	NM_005952.3	MT1X	4501	1.52994	7.54986	22.2398	3.15974e-05	0.0115807	up
NM_003124.4	chr2	73114512	73119289	4778	+	6305	NM_003124.4	SPR	6697	0.801721	5.7388	22.2066	3.19451e-05	0.0115807	up
NM_002124.3	chr6	32546546	32557613	11068	-	19794	NM_002124.3	HLA-DRB1	3123	1.70434	6.13634	21.8155	3.63514e-05	0.0129294	up
NM_003897.3	chr6	30710976	30712327	1352	-	19679	NM_003897.3	IER3	8870	1.23775	5.71018	21.6891	3.79084e-05	0.0132283	up
NM_032588.3	chr1	26377795	26394125	16331	-	3439	NM_032588.3	TRIM63	84676	2.59674	0.656646	21.6351	3.8595e-05	0.0132283	up
NM_003764.3	chr6	144471654	144513076	41423	+	19118	NM_003764.3	STX11	8676	1.71748	3.2241	21.4521	4.1022e-05	0.013711	up
NM_002318.2	chr8	23154410	23261722	107313	-	24699	NM_002318.2	LOXL2	4017	0.987788	3.64151	21.3731	4.21197e-05	0.013711	up
NR_026656.1	chr12	54519855	54526627	6773	+	34734	NR_026656.1	LOC400043	NA	1.27065	2.41266	21.3684	4.21853e-05	0.013711	up
NM_000596.2	chr7	45927959	45933267	5309	+	21280	NM_000596.2	IGFBP1	3484	2.36694	-0.118202	21.2528	4.38494e-05	0.0140103	up
NM_032648.2	chr1	32712818	32714461	1644	+	614	NM_032648.2	FAM167B	84734	2.10355	2.73857	21.0779	4.64993e-05	0.0146093	up
NM_002068.3	chr19	3136030	3163767	27738	+	48584	NM_002068.3	GNA15	2769	1.58877	3.23384	20.8061	5.09588e-05	0.0157479	up
NM_020370.2	chr12	54756229	54758270	2042	-	36240	NM_020370.2	GPR84	53831	2.61473	0.680671	20.49	5.67202e-05	0.0172457	up
NM_020179.2	chr11	93211638	93276546	64909	-	33602	NM_020179.2	SMCO4	56935	0.813584	3.48446	19.9801	6.75077e-05	0.0200262	up
NR_132114.1	chr16	2204783	2205359	577	-	43469	NR_132114.1	SNHG19	100507303	0.862053	5.32803	19.9594	6.79899e-05	0.0200262	up
NR_003662.3	chr19	23945816	24010937	65122	+	49179	NR_003662.3	RPSAP58	388524	0.725337	3.43036	19.9036	6.93052e-05	0.0200996	up
NM_033054.2	chr7	45002260	45018704	16445	-	22646	NM_033054.2	MYO1G	64005	1.71939	1.69321	19.5381	7.86141e-05	0.0222535	up
NM_080387.4	chr12	8666136	8674962	8827	+	34270	NM_080387.4	CLEC4D	338339	2.64382	-0.869186	19.5206	7.90931e-05	0.0222535	up
NR_110724.1	chr19	42041860	42043266	1407	+	49608	NR_110724.1	LINC01480	101927931	2.3363	0.653034	19.3569	8.37107e-05	0.0226382	up
NM_012335.3	chr19	8585674	8642331	56658	-	50681	NM_012335.3	MYO1F	4542	1.27169	4.51816	19.2981	8.5439e-05	0.0226382	up
NM_144590.2	chr10	90579656	90611732	32077	-	30101	NM_144590.2	ANKRD22	118932	3.03683	2.66498	19.269	8.63072e-05	0.0226382	up
NM_016639.2	chr16	3070313	3072384	2072	+	42222	NM_016639.2	TNFRSF12A	51330	1.42401	2.90857	19.2551	8.67261e-05	0.0226382	up
NM_001130861.1	chr22	19510547	19512860	2314	-	55296	NM_001130861.1	CLDN5	7122	2.01395	0.726032	19.2433	8.70833e-05	0.0226382	up
NM_013376.3	chr19	40928408	40931932	3525	-	51337	NM_013376.3	SERTAD1	29950	1.01488	5.48828	19.2241	8.7666e-05	0.0226382	up
NM_033409.3	chr20	740724	749228	8505	-	53069	NM_033409.3	SLC52A3	113278	1.43783	5.5825	19.1262	9.07089e-05	0.0228839	up
NM_003042.3	chr3	11034420	11080935	46516	+	9857	NM_003042.3	SLC6A1	6529	-0.461368	9.94636	19.0861	9.19884e-05	0.0228839	down
NM_153209.3	chr17	72322351	72351959	29609	+	45681	NM_153209.3	KIF19	124602	1.17413	6.13886	19.0773	9.22703e-05	0.0228839	up
NM_005620.1	chr1	152004982	152009511	4530	-	4641	NM_005620.1	S100A11	6282	1.22741	5.65708	19.0372	9.35723e-05	0.0228839	up
NM_173558.3	chr6	36973423	36996845	23423	+	18439	NM_173558.3	FGD2	221472	1.4572	2.96326	19.0034	9.46869e-05	0.0228839	up
NR_002174.2	chr6	25081295	25138051	56757	-	19533	NR_002174.2	CMAHP	8418	1.39939	2.66975	18.886	9.86578e-05	0.0235418	up
NM_001276.2	chr1	203148059	203155922	7864	-	5353	NM_001276.2	CHI3L1	1116	1.98281	8.93489	18.6172	0.000108432	0.0255507	up
NM_001185.3	chr7	99564350	99573735	9386	-	23026	NM_001185.3	AZGP1	563	1.36685	5.64776	18.5466	0.000111165	0.0258492	up
NM_022468.4	chr16	3096682	3110727	14046	+	42228	NM_022468.4	MMP25	64386	1.40848	1.29524	18.4731	0.000114086	0.0258492	up
NM_001123041.2	chr3	46395235	46402413	7179	+	10200	NM_001123041.2	CCR2	729230	2.66779	-0.153659	18.4483	0.000115093	0.0258492	up
NM_197975.2	chr5	180415845	180433727	17883	+	16602	NM_197975.2	BTNL3	10917	2.53832	-0.545073	18.446	0.000115184	0.0258492	up
NM_012072.3	chr20	23059993	23066977	6985	-	53270	NM_012072.3	CD93	22918	1.58541	5.78501	18.3967	0.000117211	0.0258611	up
NM_019058.3	chr10	74033677	74035794	2118	+	28536	NM_019058.3	DDIT4	54541	1.00278	8.19989	18.3782	0.000117981	0.0258611	up
NM_007021.3	chr10	45471709	45474330	2622	-	29653	NM_007021.3	C10orf10	NA	1.88744	8.14564	18.2941	0.000121552	0.0263377	up
NM_002090.2	chr4	74902306	74904490	2185	-	14547	NM_002090.2	CXCL3	2921	2.6162	0.363739	18.139	0.000128433	0.0275124	up
NM_138441.2	chr6	74134856	74162043	27188	-	20217	NM_138441.2	MB21D1	NA	1.40413	2.42186	18.0968	0.000130376	0.0276149	up
NM_003730.4	chr6	167343004	167370077	27074	-	20814	NM_003730.4	RNASET2	8635	0.787027	6.65336	17.9547	0.000137152	0.0287271	up
NM_130446.2	chr3	183205319	183273499	68181	-	12823	NM_130446.2	KLHL6	89857	1.60579	1.9381	17.8928	0.000140221	0.028994	up
NM_207361.5	chr13	39261173	39461268	200096	+	37148	NM_207361.5	FREM2	341640	-1.46784	3.99272	17.8674	0.000141502	0.028994	down
NM_000377.2	chrX	48542186	48549818	7633	+	56160	NM_000377.2	WAS	7454	1.22687	3.93516	17.7572	0.000147197	0.0297352	up
NM_014215.2	chr1	156810665	156828712	18048	-	4902	NM_014215.2	INSRR	3645	-1.59735	0.448853	17.7198	0.000149184	0.0297352	down
NM_014957.2	chr8	142138720	142205901	67182	+	24407	NM_014957.2	DENND3	22898	0.999326	5.71668	17.7067	0.000149884	0.0297352	up
NM_000660.6	chr19	41836228	41859788	23561	-	51351	NM_000660.6	TGFB1	7040	0.812415	6.82094	17.6782	0.000151428	0.0297352	up
NM_003840.4	chr8	22993101	23021543	28443	-	24697	NM_003840.4	TNFRSF10D	8793	1.9953	3.60743	17.554	0.000158339	0.0307717	up
NM_002205.4	chr12	54789045	54813050	24006	-	36247	NM_002205.4	ITGA5	3678	1.18131	5.58382	17.4948	0.000161754	0.0311144	up
NM_001113397.1	chr2	180306709	180610769	304061	-	9221	NM_001113397.1	ZNF385B	151126	-2.46514	-1.19402	17.4618	0.00016369	0.0311688	down
NM_018990.3	chrX	128913892	128929177	15286	+	56730	NM_018990.3	SASH3	54440	1.53262	3.98618	17.4177	0.000166315	0.031352	up
NM_001005376.2	chr19	44150247	44174498	24252	-	51457	NM_001005376.2	PLAUR	5329	1.74294	-0.27594	17.3756	0.000168863	0.0315171	up
NM_022904.2	chr19	15562435	15575392	12958	-	50927	NM_022904.2	RASAL3	64926	1.29392	2.20685	17.2981	0.000173661	0.0318765	up
NM_005213.3	chr3	122044011	122060816	16806	+	10781	NM_005213.3	CSTA	1475	2.47464	0.865316	17.2508	0.000176662	0.0318765	up
NM_001817.3	chr19	42125344	42133442	8099	-	51372	NM_001817.3	CEACAM4	1089	2.78998	-0.611331	17.233	0.000177805	0.0318765	up
NM_001925.2	chr8	6793342	6795860	2519	-	24533	NM_001925.2	DEFA4	1669	-4.48043	-0.318102	18.2161	0.000178793	0.0318765	down
NM_005946.2	chr16	56672578	56673999	1422	+	42809	NM_005946.2	MT1A	4489	2.06582	2.87095	17.2056	0.000179579	0.0318765	up
NM_014220.2	chr3	149086805	149095568	8764	-	12607	NM_014220.2	TM4SF1	4071	1.42103	7.6107	17.1849	0.000180934	0.0318765	up
NM_014441.2	chr19	51628137	51633567	5431	+	49996	NM_014441.2	SIGLEC9	27180	2.36925	0.646873	17.1198	0.000185255	0.0322629	up
NM_020125.2	chr1	159796479	159807282	10804	+	2017	NM_020125.2	SLAMF8	56833	3.15944	-1.06853	18.0718	0.000187447	0.0322629	up
NM_002872.4	chr22	37621301	37640339	19039	-	55607	NM_002872.4	RAC2	5880	1.43131	3.44315	17.0755	0.000188262	0.0322629	up
NM_001540.3	chr7	75931875	75933614	1740	+	21512	NM_001540.3	HSPB1	3315	1.14668	8.77203	17.0312	0.000191324	0.0324924	up
NM_002115.2	chr5	176307870	176326333	18464	-	17743	NM_002115.2	HK3	3101	1.57643	1.05257	16.9685	0.000195741	0.0329457	up
NM_145256.2	chr19	18501954	18508415	6462	-	50986	NM_145256.2	LRRC25	126364	1.47063	2.79783	16.8683	0.000203024	0.033869	up
NM_178859.3	chr15	65337708	65345734	8027	+	40546	NM_178859.3	SLC51B	123264	1.21202	3.64904	16.7524	0.000211809	0.0350247	up
NM_173833.5	chr8	27727399	27850369	122971	-	24751	NM_173833.5	SCARA5	286133	-1.49097	1.16883	16.6123	0.000222967	0.0365491	down
NM_005755.2	chr19	4229540	4237525	7986	+	48616	NM_005755.2	EBI3	10148	1.57735	2.89572	16.5123	0.000231318	0.0375911	up
NM_006762.2	chr1	31205315	31230683	25369	-	3500	NM_006762.2	LAPTM5	7805	1.35723	7.69009	16.4045	0.00024068	0.0387323	up
NM_014068.2	chr6	31082608	31107869	25262	+	18220	NM_014068.2	PSORS1C1	170679	1.21024	0.439069	16.3847	0.000242449	0.0387323	up
NR_034033.1	chr7	150130742	150145228	14487	+	22187	NR_034033.1	LINC00996	285972	-1.85113	-0.469538	16.2634	0.000253554	0.0397358	down
NM_021978.3	chr11	130029682	130080257	50576	+	32387	NM_021978.3	ST14	6768	1.35849	1.97334	16.2522	0.0002546	0.0397358	up
NM_004979.5	chrX	48818639	48828251	9613	-	57296	NM_004979.5	KCND1	3750	0.833542	4.76105	16.2474	0.000255054	0.0397358	up
NR_103715.1	chrX	68399400	68429767	30368	+	56332	NR_103715.1	LINC00269	100996279	-2.16083	0.0183482	16.1827	0.000261242	0.039965	down
NM_173648.3	chr2	179694484	179914786	220303	-	9215	NM_173648.3	CCDC141	285025	-0.897426	2.30139	16.1813	0.000261376	0.039965	down
NM_022371.3	chr1	179051112	179065131	14020	+	2259	NM_022371.3	TOR3A	64222	0.372365	6.20294	16.1657	0.000262886	0.039965	up
NM_001242376.1	chr17	42987035	42992920	5886	-	46933	NM_001242376.1	GFAP	2670	1.47752	0.517536	16.1259	0.000266794	0.0402347	up
NM_144646.3	chr4	71521258	71532348	11091	-	14525	NM_144646.3	JCHAIN	3512	2.88488	2.24169	16.041	0.000275335	0.0411931	up
NM_005161.4	chr11	57001051	57004927	3877	-	33031	NM_005161.4	APLNR	187	2.02526	6.6801	15.9086	0.000289236	0.0425875	up
NM_182854.3	chr16	50705536	50715264	9729	-	43978	NM_182854.3	SNX20	124460	1.97527	1.97586	15.8925	0.000290977	0.0425875	up
NM_003761.4	chr2	85804614	85809156	4543	+	6414	NM_003761.4	VAMP8	8673	1.16703	4.5676	15.8883	0.000291432	0.0425875	up
NM_001308054.1	chr14	24563490	24573341	9852	+	38247	NM_001308054.1	PCK2	5106	3.10816	-1.29772	18.3157	0.000296466	0.0429899	up
NM_006418.4	chr13	53602876	53626196	23321	+	37283	NM_006418.4	OLFM4	10562	-1.54813	1.7418	15.7571	0.000306063	0.0438771	down
NM_005630.2	chr3	133651540	133748920	97381	-	12511	NM_005630.2	SLCO2A1	6578	1.41099	3.21737	15.7468	0.000307239	0.0438771	up
NM_001855.4	chr9	101705995	101833074	127080	+	26117	NM_001855.4	COL15A1	1306	-0.97384	3.43111	15.6687	0.00031635	0.0448384	down
NR_046664.1	chr3	173628288	173638586	10299	-	12772	NR_046664.1	NLGN1-AS1	100874010	-2.83372	-1.3697	18.0513	0.000319962	0.0448515	down
NR_126453.1	chr15	99189092	99194450	5359	-	41972	NR_126453.1	IRAIN	104472848	2.19659	2.22256	15.6277	0.00032125	0.0448515	up
NM_024575.4	chr1	151129105	151132225	3121	+	1718	NM_024575.4	TNFAIP8L2	79626	1.43636	2.73783	15.6031	0.000324222	0.0448515	up
NM_020992.3	chr10	96997325	97050905	53581	-	30159	NM_020992.3	PDLIM1	9124	1.51043	4.90289	15.5874	0.000326136	0.0448515	up
NM_152649.3	chr16	74705753	74735046	29294	-	44226	NM_152649.3	MLKL	197259	1.83106	1.56076	15.545	0.000331377	0.0448515	up
NM_002445.3	chr8	15996826	16050300	53475	-	24627	NM_002445.3	MSR1	4481	1.95315	1.45886	15.5373	0.00033233	0.0448515	up
NM_002298.4	chr13	46700058	46756459	56402	-	37782	NM_002298.4	LCP1	3936	1.40859	5.76734	15.5312	0.000333097	0.0448515	up
NM_005733.2	chr5	137514417	137523404	8988	+	16029	NM_005733.2	KIF20A	10112	2.23483	0.321743	15.4852	0.000338906	0.0453101	up
NM_001289922.2	chr22	50014104	50051190	37087	-	55789	NM_001289922.2	C22orf34	348645	1.53207	2.50267	15.4653	0.000341446	0.0453282	up
NM_005628.2	chr19	47278140	47291842	13703	-	51568	NM_005628.2	SLC1A5	6510	1.34334	1.8571	15.4221	0.000347046	0.0457494	up
NM_004106.1	chr1	161185087	161189038	3952	+	2067	NM_004106.1	FCER1G	2207	1.5913	5.32998	15.3607	0.00035516	0.0461972	up
NR_030304.1	chr4	166307394	166307489	96	+	14030	NR_030304.1	MIR578	693163	-2.3827	-0.846577	15.3458	0.000357169	0.0461972	down
NR_049873.1	chr6	35632494	35632566	73	-	19894	NR_049873.1	MIR5690	100847048	3.0783	-1.0253	16.1467	0.000357795	0.0461972	up
NM_018557.2	chr2	140988996	142889270	1900275	-	8944	NM_018557.2	LRP1B	53353	-0.456132	6.76696	15.2567	0.000369377	0.0473683	down
NM_001700.4	chr19	827826	832018	4193	+	48505	NM_001700.4	AZU1	566	-2.41668	0.279388	15.2247	0.000373878	0.0473859	down
NM_004668.2	chr7	141695679	141806547	110869	+	22094	NM_004668.2	MGAM	8972	1.64725	0.583934	15.22	0.000374542	0.0473859	up
NM_001251991.1	chr6	24775641	24786327	10687	+	18004	NM_001251991.1	GMNN	51053	2.40815	-1.20415	15.9286	0.000385719	0.0482102	up
NR_104097.1	chr19	55043909	55057050	13142	+	50189	NR_104097.1	KIR3DX1	90011	-3.09167	-1.04176	15.1301	0.000387504	0.0482102	down
NR_027011.1	chr16	31579088	31580845	1758	-	43934	NR_027011.1	YBX3P1	440359	1.19142	4.11653	15.1218	0.00038873	0.0482102	up
NM_022131.2	chr3	139654027	140286919	632893	+	10975	NM_022131.2	CLSTN2	64084	-1.28213	4.30031	15.0823	0.000394589	0.0486169	down
NM_001080525.1	chr3	48348336	48369831	21496	-	11817	NM_001080525.1	SPINK8	646424	2.033	1.23589	15.0089	0.000405738	0.0496661	up
NM_181724.2	chr12	108983622	108991894	8273	-	36705	NM_181724.2	TMEM119	338773	1.25915	5.14715	14.9573	0.000413776	0.0500644	up
NM_006509.3	chr19	45504707	45541456	36750	+	49738	NM_006509.3	RELB	5971	0.72869	4.16915	14.9399	0.000416532	0.0500644	up
NM_002664.2	chr2	68592322	68624585	32264	+	6253	NM_002664.2	PLEK	5341	1.0501	4.6279	14.9372	0.00041696	0.0500644	up
NR_049810.1	chr1	147806603	147806678	76	-	4523	NR_049810.1	MIR5087	100847044	1.37753	0.190816	14.8824	0.000425741	0.0507952	up
NM_001067.3	chr17	38544773	38574202	29430	-	46726	NM_001067.3	TOP2A	7153	2.41678	2.08274	14.8599	0.000429418	0.0509117	up
NM_002960.1	chr1	153519809	153521734	1926	-	4676	NM_002960.1	S100A3	6274	1.77369	0.492594	14.8334	0.000433772	0.0511064	up
NM_001232.3	chr1	116242624	116311426	68803	-	4418	NM_001232.3	CASQ2	845	-0.960582	4.21005	14.8157	0.000436711	0.0511332	down
NM_006169.2	chr11	114166535	114183238	16704	+	32152	NM_006169.2	NNMT	4837	1.72106	2.48691	14.7316	0.000450973	0.0523838	up
NM_001066.2	chr1	12227060	12269277	42218	+	224	NM_001066.2	TNFRSF1B	7133	0.887815	6.37137	14.7201	0.00045295	0.0523838	up
NM_002133.2	chr22	35777060	35790207	13148	+	54971	NM_002133.2	HMOX1	3162	1.10533	5.86612	14.6931	0.00045765	0.0525817	up
NM_005623.2	chr17	32646066	32648421	2356	+	44953	NM_005623.2	CCL8	6355	2.54517	-0.0317609	14.666	0.000462422	0.0525817	up
NR_125772.1	chr13	80140862	80145581	4720	+	37353	NR_125772.1	LINC01068	103724388	2.58213	-1.31156	15.4032	0.00046303	0.0525817	up
NM_000594.3	chr6	31543344	31546113	2770	+	18244	NM_000594.3	TNF	7124	2.59508	-0.658994	14.6097	0.000472508	0.0530331	up
NM_001911.2	chr14	25042724	25045466	2743	-	39309	NM_001911.2	CTSG	1511	-2.91807	-0.43652	14.5819	0.000477577	0.0530331	down
NM_032152.4	chr19	8554940	8567538	12599	-	50678	NM_032152.4	PRAM1	84106	1.28416	2.8497	14.5787	0.000478154	0.0530331	up
NM_003844.3	chr8	23048970	23082680	33711	-	24698	NM_003844.3	TNFRSF10A	8797	1.43305	2.27335	14.5782	0.000478258	0.0530331	up
NR_003141.3	chr5	138609441	138615317	5877	+	16075	NR_003141.3	SNHG4	724102	-2.69664	-1.16129	14.5599	0.000481623	0.0530331	down
NM_005253.3	chr2	28615779	28637516	21738	+	5994	NM_005253.3	FOSL2	2355	1.11791	6.91861	14.5477	0.000483884	0.0530331	up
NM_006435.2	chr11	308107	309410	1304	+	30670	NM_006435.2	IFITM2	10581	1.20354	7.70308	14.5149	0.00049001	0.0532565	up
NM_002119.3	chr6	32971959	32977389	5431	-	19810	NM_002119.3	HLA-DOA	3111	1.21814	4.09265	14.4969	0.000493417	0.0532565	up
NM_004091.3	chr1	23832920	23857712	24793	-	3363	NM_004091.3	E2F2	1870	2.17005	-0.0354251	14.4917	0.000494398	0.0532565	up
NM_004441.4	chr3	134514099	134979309	465211	+	10933	NM_004441.4	EPHB1	2047	-0.627831	7.33039	14.4113	0.000509925	0.054617	down
NM_000623.3	chr14	96671135	96710666	39532	+	38860	NM_000623.3	BDKRB2	624	1.12189	2.34102	14.3785	0.000516405	0.0549986	up
NM_006186.3	chr2	157180944	157189287	8344	-	8996	NM_006186.3	NR4A2	4929	-1.26762	4.42031	14.3541	0.000521292	0.0552071	down
NM_003254.2	chrX	47441690	47446190	4501	+	56131	NM_003254.2	TIMP1	7076	0.992644	6.99312	14.3004	0.000532203	0.0559933	up
NM_004095.3	chr8	37888020	37917883	29864	+	23913	NM_004095.3	EIF4EBP1	1978	0.738066	4.08951	14.2885	0.000534656	0.0559933	up
NR_134873.1	chr4	154561320	154602338	41019	+	13951	NR_134873.1	LOC100419170	100419170	1.96339	0.327298	14.2739	0.000537674	0.0559983	up
NR_040599.1	chr19	48758932	48761451	2520	+	49829	NR_040599.1	CARD8-AS1	100505812	0.993361	2.10258	14.1686	0.000560017	0.057951	up
NM_000490.4	chr20	3063202	3065370	2169	-	53130	NM_000490.4	AVP	551	3.04243	0.0126553	14.137	0.000566916	0.057951	up
NM_020925.2	chr1	64936476	65158741	222266	+	1077	NM_020925.2	CACHD1	57685	-0.994095	0.608487	14.1164	0.000571466	0.057951	down
NM_024869.2	chr1	26485511	26489119	3609	+	474	NM_024869.2	FAM110D	79927	1.22406	4.22543	14.1159	0.000571572	0.057951	up
NM_000593.5	chr6	32812986	32821748	8763	-	19807	NM_000593.5	TAP1	6890	0.767464	4.01037	14.1149	0.000571794	0.057951	up
NM_012242.2	chr10	54074041	54077417	3377	+	28385	NM_012242.2	DKK1	22943	1.64652	1.62243	14.0626	0.00058351	0.0588222	up
NR_026670.2	chr12	131649556	131697476	47921	+	35500	NR_026670.2	LINC01257	116437	-2.61542	-1.15576	14.7198	0.000589345	0.0590944	down
NR_111939.1	chr1	221874762	221910242	35481	-	5519	NR_111939.1	DUSP10	11221	-2.10035	-1.28491	14.0092	0.000595738	0.0590991	down
NM_138450.5	chr13	50202435	50208008	5574	+	37243	NM_138450.5	ARL11	115761	1.53429	1.18301	13.9952	0.000598977	0.0590991	up
NR_028326.1	chr11	126987	131920	4934	-	32405	NR_028326.1	LINC01001	100133161	2.21776	-1.37612	14.6648	0.00060101	0.0590991	up
NM_001004323.1	chr7	100054238	100061894	7657	-	23061	NM_001004323.1	C7orf61	402573	0.944613	3.34461	13.9825	0.000601933	0.0590991	up
NM_006120.3	chr6	32916391	32920899	4509	-	19809	NM_006120.3	HLA-DMA	3108	1.04551	5.02281	13.9546	0.000608517	0.059436	up
NM_019043.3	chr10	26727266	26856732	129467	+	28089	NM_019043.3	APBB1IP	54518	1.25217	5.00253	13.8629	0.000630624	0.0612778	up
NM_003355.2	chr11	73685716	73693889	8174	-	33456	NM_003355.2	UCP2	7351	0.923229	5.9627	13.8266	0.000639626	0.0618338	up
NM_030915.3	chr2	30454397	30482899	28503	+	6017	NM_030915.3	LBH	81606	-0.758808	6.24256	13.8006	0.000646152	0.062146	down
NM_017817.2	chr13	111175413	111214084	38672	-	38075	NM_017817.2	RAB20	55647	1.09176	3.58279	13.7453	0.000660271	0.0624265	up
NM_000584.3	chr4	74606223	74609433	3211	+	13531	NM_000584.3	CXCL8	3576	2.29866	3.93747	13.7294	0.00066438	0.0624265	up
NM_022093.1	chr1	175036994	175117202	80209	+	2239	NM_022093.1	TNN	63923	-1.81089	0.14277	13.7175	0.00066748	0.0624265	down
NM_016232.4	chr2	102927962	102968497	40536	+	6565	NM_016232.4	IL1RL1	9173	2.96287	-0.697568	13.6952	0.000673332	0.0624265	up
NM_005615.4	chr14	21249210	21250626	1417	+	38158	NM_005615.4	RNASE6	6039	1.33418	3.51689	13.6931	0.000673878	0.0624265	up
NM_152565.1	chr8	87111139	87166454	55316	+	24179	NM_152565.1	ATP6V0D2	245972	1.87436	-0.920433	13.6756	0.000678502	0.0624265	up
NM_012396.4	chr1	201433412	201438299	4888	-	5319	NM_012396.4	PHLDA3	23612	0.569281	3.25036	13.6755	0.000678525	0.0624265	up
NM_001423.2	chr12	13349602	13369708	20107	+	34361	NM_001423.2	EMP1	2012	1.36193	6.8321	13.6743	0.000678846	0.0624265	up
NM_005856.2	chr7	45197367	45223849	26483	+	21277	NM_005856.2	RAMP3	10268	1.07862	5.59286	13.6742	0.000678873	0.0624265	up
NM_020945.1	chr10	49893518	50191001	297484	+	28347	NM_020945.1	WDFY4	57705	1.29568	3.28109	13.653	0.000684546	0.0626426	up
NR_026863.1	chr21	44881974	44898103	16130	-	54506	NR_026863.1	LINC00313	114038	2.17531	-0.971603	13.5347	0.000717056	0.0653005	up
NM_004271.3	chr6	6588934	6655216	66283	+	17902	NM_004271.3	LY86	9450	1.22395	3.95876	13.5059	0.000725228	0.0657273	up
NM_001164407.1	chr17	1606084	1613662	7579	-	45996	NM_001164407.1	TLCD2	727910	1.16777	3.62524	13.4185	0.000750587	0.0677	up
NM_014442.2	chr19	51954251	51961708	7458	-	51835	NM_014442.2	SIGLEC8	27181	1.21275	4.1655	13.391	0.000758769	0.0681122	up
NM_148961.3	chr2	241078446	241080073	1628	-	9683	NM_148961.3	OTOS	150677	1.34451	3.82516	13.3498	0.000771193	0.0686913	up
NM_001195422.1	chr19	17445791	17453540	7750	+	49029	NM_001195422.1	GTPBP3	84705	2.29742	-1.3171	13.9671	0.000772509	0.0686913	up
NM_005779.2	chr5	77781038	77944648	163611	-	17019	NM_005779.2	LHFPL2	10184	0.604847	6.69284	13.3304	0.000777116	0.0687766	up
NM_001135032.1	chr2	75719444	75788092	68649	-	8479	NM_001135032.1	EVA1A	84141	1.89102	-0.84027	13.3013	0.000786092	0.0692459	up
NM_003651.4	chr12	10851676	10875953	24278	-	35780	NM_003651.4	YBX3	8531	1.28182	2.39474	13.2828	0.000791858	0.0693222	up
NM_001243328.1	chr6	150204511	150217195	12685	-	20707	NM_001243328.1	RAET1E	135250	1.20275	0.296773	13.275	0.000794313	0.0693222	up
NM_181712.4	chr1	62701837	62785083	83247	-	4004	NM_181712.4	KANK4	163782	-1.07348	1.12632	13.2189	0.000812127	0.0699218	down
NM_014059.2	chr13	42031542	42045013	13472	+	37164	NM_014059.2	RGCC	28984	0.605479	8.45287	13.2187	0.000812206	0.0699218	up
NR_026658.1	chr12	54472623	54475607	2985	-	36225	NR_026658.1	LOC100240735	100240735	2.38267	-1.3532	13.829	0.000812311	0.0699218	up
NM_005565.4	chr5	169673237	169724846	51610	-	17685	NM_005565.4	LCP2	3937	1.08296	4.60898	13.1113	0.000847502	0.0726194	up
NM_003370.3	chr19	46010688	46030241	19554	+	49758	NM_003370.3	VASP	7408	0.743487	6.41283	13.0804	0.000857973	0.0729049	up
NM_005582.2	chr5	66478103	66492617	14515	-	16950	NM_005582.2	CD180	4064	1.3671	2.1234	13.0786	0.000858569	0.0729049	up
NM_138786.3	chr3	149036285	149051548	15264	-	12606	NM_138786.3	TM4SF18	116441	2.50226	-0.843239	13.0083	0.000882898	0.0745269	up
NM_001170704.1	chrX	131503342	131623996	120655	-	57817	NM_001170704.1	MBNL3	55796	-2.17534	-1.3133	13.5755	0.000891191	0.0745269	down
NM_032782.4	chr5	156512843	156536248	23406	-	17619	NM_032782.4	HAVCR2	84868	1.12119	5.04071	12.9791	0.000893228	0.0745269	up
NM_052864.2	chr4	113196782	113207059	10278	-	14834	NM_052864.2	TIFA	92610	0.8721	3.9887	12.9784	0.000893484	0.0745269	up
NM_017639.3	chr4	155155527	155312449	156923	-	15032	NM_017639.3	DCHS2	54798	-0.875379	4.4551	12.9571	0.000901086	0.0748298	down
NM_000442.4	chr17	62396775	62404856	8082	-	47233	NM_000442.4	PECAM1	5175	1.07058	7.44985	12.9081	0.000918837	0.0759692	up
NM_000223.3	chr17	39017430	39023462	6033	-	46741	NM_000223.3	KRT12	3859	-2.17569	-1.3374	13.6187	0.000929876	0.0765462	down
NR_003237.1	chr14	101411986	101412056	71	+	38935	NR_003237.1	SNORD113-9	767569	-2.23663	-1.26072	13.4118	0.000946497	0.0772787	down
NM_014918.4	chr15	101715928	101792137	76210	-	41998	NM_014918.4	CHSY1	22856	0.767525	6.89437	12.8325	0.000946973	0.0772787	up
NM_005461.4	chr20	39314488	39317880	3393	-	53487	NM_005461.4	MAFB	9935	0.929972	5.20079	12.8092	0.000955841	0.0776662	up
NM_153006.2	chr17	42082032	42086436	4405	+	45193	NM_153006.2	NAGS	162417	0.992156	2.85188	12.7938	0.000961731	0.0778094	up
NR_024031.2	chr4	53578561	53580305	1745	+	13419	NR_024031.2	DANCR	57291	0.407819	6.5756	12.7738	0.000969447	0.078064	up
NM_003830.3	chr19	52114756	52133727	18972	-	51845	NM_003830.3	SIGLEC5	8778	1.24723	1.33031	12.7613	0.000974299	0.078064	up
NM_003786.3	chr17	48712218	48769063	56846	+	45425	NM_003786.3	ABCC3	8714	2.04541	0.0588444	12.7537	0.000977301	0.078064	up
NM_001248006.1	chr11	6469843	6495689	25847	-	32614	NM_001248006.1	TRIM3	10612	-2.17315	-1.39063	13.2633	0.00099985	0.0795281	down
NM_002962.1	chr1	153509623	153514241	4619	-	4673	NM_002962.1	S100A5	6276	2.1073	-1.39544	13.2376	0.00100937	0.0799483	up
NM_001785.2	chr1	20915444	20945401	29958	+	353	NM_001785.2	CDA	978	1.20714	3.4039	12.6164	0.00103259	0.0813347	up
NM_002216.2	chr10	7745236	7791483	46248	+	27924	NM_002216.2	ITIH2	3698	-0.974353	4.59933	12.6056	0.00103704	0.0813347	down
NM_005044.4	chrX	3522384	3631675	109292	-	57026	NM_005044.4	PRKX	5613	1.03655	5.43768	12.5858	0.00104532	0.0813347	up
NM_004666.2	chr6	133001997	133035194	33198	-	20561	NM_004666.2	VNN1	8876	1.62079	0.508313	12.5796	0.00104794	0.0813347	up
NM_000566.3	chr1	149754250	149764074	9825	+	1643	NM_000566.3	FCGR1A	2209	1.93855	-0.0284211	12.5613	0.0010557	0.0813347	up
NM_005252.3	chr14	75745481	75748937	3457	+	38661	NM_005252.3	FOS	2353	-1.16876	7.81074	12.5551	0.00105831	0.0813347	down
NM_002055.4	chr17	42982994	42992920	9927	-	46931	NM_002055.4	GFAP	2670	1.17364	14.2101	12.553	0.00105921	0.0813347	up
NM_032193.3	chr11	65485144	65488409	3266	-	33286	NM_032193.3	RNASEH2C	84153	0.359378	6.28903	12.5406	0.00106453	0.0813347	up
NR_134590.1	chr6	168625959	168627197	1239	-	20829	NR_134590.1	LOC105378137	105378137	-2.3988	-1.04318	12.5349	0.00106697	0.0813347	down
NM_002003.4	chr9	137795082	137809849	14768	-	27717	NM_002003.4	FCN1	2219	2.00251	2.50752	12.5264	0.0010706	0.0813347	up
NM_001347619.1	chr1	22970110	22974604	4495	+	387	NM_001347619.1	C1QC	714	2.61861	-1.21958	13.0695	0.00107434	0.0813347	up
NM_015559.2	chr18	42260863	42648475	387613	+	47861	NM_015559.2	SETBP1	26040	-0.530425	5.43108	12.467	0.00109653	0.0826191	down
NM_005759.5	chr2	204192962	204296896	103935	+	7321	NM_005759.5	ABI2	10152	-2.05849	-1.01747	13.006	0.00110007	0.0826191	down
NM_181538.2	chr7	99520892	99527243	6352	-	23025	NM_181538.2	GJC3	349149	1.14342	1.2636	12.4275	0.0011141	0.0832874	up
NM_181844.3	chr17	6926369	6932961	6593	+	44542	NM_181844.3	BCL6B	255877	1.16346	4.53587	12.4193	0.0011178	0.0832874	up
NR_103549.1	chr5	90606731	90610219	3489	-	17095	NR_103549.1	LUCAT1	100505994	2.30618	-1.1844	12.9375	0.0011285	0.0837533	up
NM_003673.3	chr17	37821599	37822807	1209	+	45040	NM_003673.3	TCAP	8557	1.18242	3.87377	12.383	0.00113432	0.0838554	up
NM_001287444.1	chr2	3751182	3895001	143820	+	5783	NM_001287444.1	DCDC2C	728597	1.8003	-0.870234	12.3264	0.00116056	0.0852773	up
NM_176870.2	chr16	56666534	56667898	1365	+	42807	NM_176870.2	MT1M	4499	1.06135	6.86849	12.322	0.0011626	0.0852773	up
NM_002053.2	chr1	89517987	89531043	13057	-	4156	NM_002053.2	GBP1	2633	1.34259	5.46625	12.2915	0.00117702	0.0860002	up
NM_012125.3	chr15	34261089	34357287	96199	+	40154	NM_012125.3	CHRM5	1133	2.39349	-0.841245	12.2736	0.00118558	0.086291	up
NM_004946.2	chr5	169064251	169510386	446136	+	16434	NM_004946.2	DOCK2	1794	1.36812	3.9428	12.2441	0.00119984	0.086993	up
NM_031310.2	chr19	17462257	17488158	25902	-	50961	NM_031310.2	PLVAP	83483	1.18938	2.76422	12.1637	0.0012396	0.0891737	up
NM_005195.3	chr8	48649476	48650726	1251	-	24871	NM_005195.3	CEBPD	1052	1.2376	7.57104	12.155	0.001244	0.0891737	up
NM_001778.3	chr1	160648536	160681641	33106	-	4989	NM_001778.3	CD48	962	2.01497	0.100163	12.1548	0.00124411	0.0891737	up
NM_007191.4	chr12	65444404	65515346	70943	-	36415	NM_007191.4	WIF1	11197	-0.984883	8.98454	12.1301	0.00125663	0.0892036	down
NR_134275.1	chr5	17404128	17441803	37676	+	15290	NR_134275.1	LOC101929544	NA	-2.02709	-1.0723	12.128	0.00125774	0.0892036	down
NM_001015.4	chr19	49999622	50002969	3348	+	49908	NM_001015.4	RPS11	6205	0.361583	9.30619	12.1175	0.0012631	0.0892036	up
NM_032881.2	chr1	36859021	36863560	4540	-	3615	NM_032881.2	LSM10	84967	0.359012	6.58508	12.109	0.00126748	0.0892036	up
NM_004557.3	chr6	32162620	32191844	29225	-	19785	NM_004557.3	NOTCH4	4855	1.26481	1.51875	12.1076	0.00126819	0.0892036	up
NM_003596.3	chr7	65670259	65825438	155180	+	21401	NM_003596.3	TPST1	8460	0.451687	6.07292	12.0858	0.00127947	0.0896626	up
NM_000189.4	chr2	75059782	75120481	60700	+	6374	NM_000189.4	HK2	3099	0.776511	4.55032	12.0388	0.00130418	0.0908552	up
NM_015675.3	chr19	2476123	2478257	2135	+	48570	NM_015675.3	GADD45B	4616	0.865661	7.29694	12.0351	0.00130612	0.0908552	up
NM_002155.4	chr1	161494330	161496687	2358	+	2081	NM_002155.4	HSPA6	3310	1.72357	2.35491	12.011	0.00131904	0.0910822	up
NM_001190452.1	chr17	22022437	22023991	1555	+	44832	NM_001190452.1	MTRNR2L1	100462977	3.07655	-0.20595	12.011	0.00131905	0.0910822	up
NM_000756.3	chr8	67088612	67090880	2269	-	24960	NM_000756.3	CRH	1392	-1.3761	3.15219	11.898	0.00138126	0.09503	down
NM_001012.1	chr1	45241246	45244412	3167	+	864	NM_001012.1	RPS8	6202	0.383127	8.30987	11.8822	0.00139024	0.0952996	up
NM_001002029.3	chr6	31982572	32003195	20624	+	18307	NM_001002029.3	C4B	721	1.6163	4.88335	11.8624	0.0014015	0.095714	up
NM_015464.2	chr7	16501106	16505474	4369	-	22403	NM_015464.2	SOSTDC1	25928	-1.621	0.765046	11.8538	0.00140644	0.095714	down
NR_038966.1	chr7	157647277	157658784	11508	+	22273	NR_038966.1	LOC100506585	100506585	1.19864	1.079	11.8202	0.00142594	0.0965922	up
NM_006705.3	chr9	92219927	92221470	1544	+	26025	NM_006705.3	GADD45G	10912	0.750403	4.79151	11.8139	0.00142959	0.0965922	up
NM_001201483.1	chr1	8921059	8931635	10577	-	3160	NM_001201483.1	ENO1	2023	-0.96888	0.548308	11.7623	0.00146016	0.0983055	down
NM_000840.2	chr7	86273230	86494192	220963	+	21556	NM_000840.2	GRM3	2913	-0.453055	9.45514	11.7309	0.0014791	0.0992263	down
NM_006581.3	chr6	96463845	96663488	199644	+	18812	NM_006581.3	FUT9	10690	-0.446698	8.29501	11.712	0.00149062	0.0996444	down
NM_182565.3	chr17	74261286	74267379	6094	+	45753	NM_182565.3	UBALD2	283991	0.51356	6.76663	11.6924	0.00150264	0.0998376	up
NM_015175.2	chr3	47021173	47051194	30022	+	10213	NM_015175.2	NBEAL2	23218	0.818975	4.30966	11.69	0.0015041	0.0998376	up
NM_152445.2	chr14	74399695	74417117	17423	-	39669	NM_152445.2	FAM161B	145483	-0.373569	5.86398	11.6616	0.0015218	0.100027	down
NM_000416.2	chr6	137518621	137540567	21947	-	20622	NM_000416.2	IFNGR1	3459	0.617961	7.59811	11.6594	0.00152316	0.100027	up
NR_110796.1	chr18	21574177	21595424	21248	-	48167	NR_110796.1	TTC39C-AS1	102724246	1.10936	0.682337	11.6542	0.00152643	0.100027	up
NM_001871.2	chr3	148545588	148577974	32387	+	11020	NM_001871.2	CPB1	1360	1.35541	0.383085	11.6514	0.00152819	0.100027	up
NM_003740.3	chr6	39156747	39197251	40505	-	19944	NM_003740.3	KCNK5	8645	1.02348	-0.0879228	11.6208	0.00154752	0.100942	up
NM_004120.4	chr1	89571815	89591842	20028	-	4157	NM_004120.4	GBP2	2634	1.17738	5.62189	11.5942	0.00156455	0.101353	up
NM_016459.3	chr5	138723257	138725605	2349	-	17404	NM_016459.3	MZB1	51237	2.71347	-0.194278	11.5942	0.00156457	0.101353	up
NM_152309.2	chr10	98353069	98480279	127211	-	30212	NM_152309.2	PIK3AP1	118788	1.21997	4.76803	11.5282	0.00160771	0.103312	up
NM_015692.2	chr19	17003762	17137625	133864	-	50951	NM_015692.2	CPAMD8	27151	1.2952	3.69284	11.5275	0.00160815	0.103312	up
NM_001007595.2	chr15	62455737	62457482	1746	-	41451	NM_001007595.2	C2CD4B	388125	1.75219	3.2191	11.5228	0.00161126	0.103312	up
NM_015136.2	chr3	52529356	52558511	29156	+	10374	NM_015136.2	STAB1	23166	1.02389	5.32633	11.4645	0.00165054	0.105473	up
NM_005306.2	chr19	35940617	35942669	2053	+	49329	NM_005306.2	FFAR2	2867	1.70487	-0.21284	11.4469	0.00166257	0.105882	up
NM_003155.2	chr8	23699434	23712320	12887	-	24706	NM_003155.2	STC1	6781	1.58949	3.50259	11.3997	0.00169531	0.107604	up
NM_032587.3	chr5	40841410	40855456	14047	+	15376	NM_032587.3	CARD6	84674	0.986225	4.10026	11.3863	0.00170478	0.107673	up
NM_005797.3	chr11	118124131	118135251	11121	-	33867	NM_005797.3	MPZL2	10205	1.63567	3.38991	11.382	0.00170783	0.107673	up
NM_020650.2	chr19	50030875	50046890	16016	+	49912	NM_020650.2	RCN3	57333	0.53814	3.53551	11.3609	0.0017228	0.108255	up
NM_015312.3	chr4	123091758	123283914	192157	+	13815	NM_015312.3	KIAA1109	84162	-0.44795	8.73218	11.3442	0.00173473	0.108642	down
NR_030766.1	chr7	57233377	57247863	14487	-	22742	NR_030766.1	GUSBP10	642006	-2.07955	-1.38244	11.7883	0.0017451	0.108653	down
NM_001099409.1	chr11	65343509	65360116	16608	+	31655	NM_001099409.1	EHBP1L1	254102	0.549587	6.40193	11.3261	0.00174778	0.108653	up
NM_004273.4	chr10	73724120	73773322	49203	+	28529	NM_004273.4	CHST3	9469	0.532137	6.48431	11.3201	0.00175219	0.108653	up
NM_000984.5	chr17	27047000	27051374	4375	+	44857	NM_000984.5	RPL23A	6147	0.385223	4.8448	11.3031	0.00176458	0.109063	up
NR_038996.1	chr12	109489846	109491770	1925	-	36716	NR_038996.1	USP30-AS1	100131733	1.73528	-0.550353	11.2833	0.00177909	0.109348	up
NM_022107.2	chr6	32158543	32163300	4758	-	19784	NM_022107.2	GPSM3	63940	2.33421	-1.18927	11.7333	0.00178253	0.109348	up
NM_005092.3	chr1	173010360	173020103	9744	-	5142	NM_005092.3	TNFSF18	8995	2.78407	-0.335176	11.251	0.00180316	0.109348	up
NM_173515.2	chr6	154726433	154831753	105321	-	20737	NM_173515.2	CNKSR3	154043	0.700531	5.6562	11.2457	0.00180712	0.109348	up
NM_021149.3	chr16	84599202	84651702	52501	-	44303	NM_021149.3	COTL1	23406	0.591597	8.31358	11.2401	0.00181134	0.109348	up
NM_001348107.1	chr9	35909480	35911617	2138	+	25808	NM_001348107.1	LINC00961	NA	0.964266	3.24392	11.232	0.00181743	0.109348	up
NM_025159.2	chrX	30576941	30596033	19093	-	57167	NM_025159.2	CXorf21	80231	1.51243	0.920316	11.2298	0.00181907	0.109348	up
NM_002163.2	chr16	85932774	85956212	23439	+	43236	NM_002163.2	IRF8	3394	1.22589	4.20997	11.2263	0.00182174	0.109348	up
NM_080614.1	chr20	44402847	44420547	17701	-	53538	NM_080614.1	WFDC3	140686	0.859906	1.10681	11.2243	0.00182324	0.109348	up
NM_133471.3	chr6	30644166	30655672	11507	-	19667	NM_133471.3	PPP1R18	170954	1.30529	2.88482	11.2191	0.0018272	0.109348	up
NM_175900.3	chr16	29753784	29757340	3557	-	43847	NM_175900.3	C16orf54	283897	1.28033	0.69635	11.2026	0.0018398	0.109753	up
NM_001112706.2	chr7	12610203	12693228	83026	+	20986	NM_001112706.2	SCIN	85477	1.51664	1.57553	11.1057	0.00191555	0.113912	up
NM_000101.3	chr16	88709697	88717492	7796	-	44341	NM_000101.3	CYBA	1535	0.628686	7.00241	11.0451	0.00196454	0.116458	up
NM_001282714.1	chr3	58549839	58613337	63499	-	12078	NM_001282714.1	FAM107A	11170	0.937581	3.89011	11.0111	0.00199266	0.117755	up
NM_000112.3	chr5	149340300	149366963	26664	+	16303	NM_000112.3	SLC26A2	1836	0.746463	5.60756	10.9682	0.00202876	0.119286	up
NM_016132.4	chr15	48431625	48470558	38934	-	41302	NM_016132.4	MYEF2	50804	1.90767	-1.36546	11.3967	0.00203123	0.119286	up
NM_001288.4	chr6	31698358	31704341	5984	-	19738	NM_001288.4	CLIC1	1192	1.37616	0.287877	10.94	0.00205281	0.120179	up
NM_000552.4	chr12	6058040	6233841	175802	-	35617	NM_000552.4	VWF	7450	0.947797	9.83881	10.9227	0.00206778	0.120468	up
NM_000327.3	chr11	62380213	62382592	2380	+	31506	NM_000327.3	ROM1	6094	0.781583	6.70189	10.9195	0.00207054	0.120468	up
NM_002990.4	chr16	57392695	57400102	7408	+	42841	NM_002990.4	CCL22	6367	2.0271	0.0476067	10.8999	0.00208763	0.120725	up
NR_003714.1	chr22	24647589	24661492	13904	+	54786	NR_003714.1	POM121L9P	29774	1.5275	-0.590865	10.8876	0.0020984	0.120725	up
NM_001300790.1	chr6	32723875	32731330	7456	-	19799	NM_001300790.1	HLA-DQB2	3120	1.54951	-0.089379	10.8856	0.00210019	0.120725	up
NM_002121.5	chr6	33043703	33057473	13771	+	18338	NM_002121.5	HLA-DPB1	3115	0.949678	6.23098	10.8851	0.00210056	0.120725	up
NM_001023563.3	chr19	57752053	57774106	22054	+	50310	NM_001023563.3	ZNF805	390980	-1.90786	-1.42356	12.0247	0.00212946	0.122014	down
NM_001285448.1	chr16	15068660	15132187	63528	+	42371	NM_001285448.1	PDXDC1	23042	2.13865	-1.28478	10.8428	0.00213822	0.122144	up
NM_001297422.1	chr12	1025372	1058888	33517	-	35571	NM_001297422.1	RAD52	5893	-2.09159	-1.03702	10.8285	0.00215111	0.122509	down
NM_016332.3	chr16	1988230	1993327	5098	-	43451	NM_016332.3	MSRB1	51734	0.380469	6.33703	10.8169	0.0021616	0.122736	up
NR_027040.1	chr7	149564783	149570951	6169	-	23470	NR_027040.1	ATP6V0E2-AS1	401431	-0.445409	4.4752	10.7796	0.00219576	0.123946	down
NM_001733.4	chr12	7187513	7245043	57531	-	35678	NM_001733.4	C1R	715	0.980712	6.88492	10.7792	0.00219607	0.123946	up
NM_006931.2	chr12	8071824	8088892	17069	-	35701	NM_006931.2	SLC2A3	6515	0.780127	7.28995	10.7618	0.00221224	0.1242	up
NR_027484.2	chr1	149369294	149378303	9010	+	1635	NR_027484.2	FCGR1CP	100132417	2.0065	-0.877046	10.7484	0.00222471	0.1242	up
NR_038908.1	chr11	128561567	128565918	4352	-	34029	NR_038908.1	SENCR	100507392	0.968158	2.41463	10.7468	0.00222621	0.1242	up
NM_001142594.2	chr14	93403259	93582264	179006	-	39833	NM_001142594.2	ITPK1	3705	0.679665	3.31589	10.7411	0.00223156	0.1242	up
NM_004089.3	chrX	106956451	106960291	3841	-	57668	NM_004089.3	TSC22D3	1831	0.68728	4.04497	10.7348	0.0022375	0.1242	up
NR_135176.1	chr16	1630528	1660329	29802	+	42121	NR_135176.1	LOC105371046	105371046	1.91357	-0.841431	10.7265	0.00224532	0.1242	up
NM_025157.4	chr12	120648242	120687964	39723	-	36870	NM_025157.4	PXN	5829	1.95403	-0.903153	10.7251	0.00224668	0.1242	up
NM_198946.2	chr9	139638469	139642980	4512	-	27760	NM_198946.2	LCN6	158062	1.53191	0.230885	10.6914	0.00227883	0.125609	up
NR_131012.1	chr11	65190269	65213011	22743	+	31642	NR_131012.1	NEAT1	283131	1.74572	6.53349	10.6525	0.00231651	0.127313	up
NM_001256630.1	chr11	1432382	1483919	51538	+	30729	NM_001256630.1	BRSK2	9024	-1.90845	-1.25558	10.6374	0.00233127	0.127752	down
NM_003012.4	chr8	41119476	41166990	47515	-	24837	NM_003012.4	SFRP1	6422	-0.589338	7.39657	10.5513	0.00241763	0.132101	down
NM_030622.7	chr19	41699112	41713444	14333	+	49588	NM_030622.7	CYP2S1	29785	1.03561	1.62166	10.4893	0.00248202	0.134978	up
NR_026951.1	chr17	8123948	8127361	3414	-	46248	NR_026951.1	LINC00324	284029	0.573377	2.01494	10.4868	0.00248462	0.134978	up
NM_178840.3	chr1	16330731	16333190	2460	+	282	NM_178840.3	C1orf64	NA	0.921396	6.07299	10.4761	0.00249589	0.135201	up
NM_004454.2	chr3	185764106	185826901	62796	-	12875	NM_004454.2	ETV5	2119	-0.44876	7.58884	10.4607	0.00251222	0.135326	down
NM_003608.3	chr14	88471468	88481155	9688	+	38735	NM_003608.3	GPR65	8477	1.59447	1.97876	10.4604	0.00251256	0.135326	up
NM_003979.3	chr12	13043956	13066600	22645	+	34356	NM_003979.3	GPRC5A	9052	1.3574	0.673889	10.4438	0.00253032	0.135895	up
NM_182528.3	chr2	119913819	119916471	2653	-	8812	NM_182528.3	C1QL2	165257	-0.719188	5.5065	10.4342	0.00254063	0.136061	down
NM_033261.2	chr10	1064847	1071799	6953	-	29240	NM_033261.2	IDI2	91734	0.435597	3.45136	10.4255	0.00255008	0.13618	up
NM_006160.3	chr17	37760021	37764175	4155	-	46683	NM_006160.3	NEUROD2	4761	-1.59875	2.68104	10.4157	0.00256068	0.136292	down
NM_002935.2	chr14	21359562	21360507	946	+	38159	NM_002935.2	RNASE3	6037	1.82117	0.677371	10.4027	0.00257485	0.136292	up
NM_006022.3	chr13	45006279	45011060	4782	-	37756	NM_006022.3	TSC22D1	8848	0.569273	7.53075	10.402	0.00257559	0.136292	up
NR_135293.1	chr14	105127457	105131895	4439	-	39942	NR_135293.1	LOC101929634	NA	-1.47465	0.86801	10.3949	0.00258342	0.136292	down
NR_132656.1	chr3	152057487	152058779	1293	-	12647	NR_132656.1	TMEM14EP	645843	-2.01499	-1.23976	10.3904	0.00258833	0.136292	down
NM_001295.2	chr3	46243200	46249832	6633	-	11770	NM_001295.2	CCR1	1230	1.57515	4.1019	10.3754	0.00260486	0.136592	up
NM_052943.3	chr1	27331511	27339333	7823	-	3454	NM_052943.3	FAM46B	NA	0.805683	1.70958	10.3721	0.00260851	0.136592	up
NM_004444.4	chr7	100400187	100425143	24957	-	23076	NM_004444.4	EPHB4	2050	0.975019	5.53164	10.3288	0.00265699	0.138745	up
NM_005127.2	chr12	10004968	10022458	17491	-	35738	NM_005127.2	CLEC2B	9976	1.38155	4.56814	10.2984	0.0026916	0.140164	up
NM_016613.6	chr4	159045732	159093718	47987	-	15045	NM_016613.6	FAM198B	NA	-1.00601	0.802131	10.2754	0.00271813	0.141155	down
NM_001122679.1	chr5	166711843	167691162	979320	+	16418	NM_001122679.1	TENM2	57451	-0.701199	1.69395	10.2508	0.0027468	0.142253	down
NM_001278494.1	chr11	71820633	71823278	2646	-	33422	NM_001278494.1	ANAPC15	25906	1.12854	-0.264151	10.2425	0.00275651	0.142364	up
NM_001031801.1	chr22	31644348	31673624	29277	+	54931	NM_001031801.1	LIMK2	3985	0.858511	2.05361	10.1917	0.00281701	0.144814	up
NM_152914.2	chr17	21142183	21156578	14396	-	46449	NM_152914.2	NATD1	256302	0.370815	5.72928	10.1847	0.00282538	0.144814	up
NM_001242815.1	chr2	42162508	42180943	18436	-	8146	NM_001242815.1	C2orf91	400950	1.69187	-1.30837	10.5594	0.002827	0.144814	up
NM_022767.3	chr15	89164527	89175512	10986	+	40899	NM_022767.3	AEN	64782	0.555047	4.96915	10.1749	0.00283719	0.144943	up
NM_003486.6	chr16	87863622	87903105	39484	-	44337	NM_003486.6	SLC7A5	8140	0.884576	9.64685	10.1138	0.0029124	0.148383	up
NR_120517.1	chr7	87845975	87859083	13109	+	21582	NR_120517.1	LOC102723885	102723885	1.90234	-1.27959	10.4724	0.0029272	0.148735	up
NM_004345.4	chr3	48264837	48266981	2145	+	10225	NM_004345.4	CAMP	820	-2.03664	-0.210309	10.0735	0.00296301	0.15015	down
NM_138693.3	chr7	130417382	130418860	1479	-	23319	NM_138693.3	KLF14	136259	-1.68441	-0.547056	10.0621	0.00297761	0.150485	down
NM_025098.3	chr11	75428864	75444003	15140	+	31901	NM_025098.3	MOGAT2	80168	2.06491	-1.30629	10.0552	0.00298645	0.150528	up
NM_001136482.1	chr19	10959106	10980360	21255	+	48837	NM_001136482.1	C19orf38	255809	0.904209	2.2026	10.0345	0.003013	0.151461	up
NM_001271856.1	chr12	52404276	52409673	5398	+	34665	NM_001271856.1	GRASP	160622	-1.56063	-0.861209	10.027	0.0030228	0.15155	down
NM_020529.2	chr14	35870716	35873960	3245	-	39356	NM_020529.2	NFKBIA	4792	0.70588	7.75773	10.0099	0.00304501	0.152158	up
NM_002167.4	chr1	23884421	23886285	1865	-	3364	NM_002167.4	ID3	3399	0.837683	7.25784	10.0034	0.00305355	0.152158	up
NM_002118.4	chr6	32902406	32908847	6442	-	19808	NM_002118.4	HLA-DMB	3109	1.16855	4.51947	9.99374	0.0030662	0.152158	up
NM_130769.3	chr11	64701943	64703360	1418	-	33251	NM_130769.3	GPHA2	170589	1.63933	-0.911501	9.99283	0.00306741	0.152158	up
NM_001080448.2	chr3	96533425	97467786	934362	+	10542	NM_001080448.2	EPHA6	285220	-0.80762	3.31652	9.98381	0.00307931	0.152158	down
NR_024470.1	chr20	61294379	61297973	3595	-	53761	NR_024470.1	SLCO4A1-AS1	100127888	1.59505	-0.485295	9.98075	0.00308336	0.152158	up
NR_134631.1	chr22	41947713	41956887	9175	-	55700	NR_134631.1	LOC105373044	105373044	1.38787	0.0578882	9.9216	0.00316279	0.155654	up
NM_020400.5	chr12	6728001	6745297	17297	-	35647	NM_020400.5	LPAR5	57121	1.78109	-1.25679	10.2725	0.00317224	0.155654	up
NM_002117.5	chr6	31236526	31239913	3388	-	19696	NM_002117.5	HLA-C	3107	0.560276	9.22495	9.90973	0.00317898	0.155654	up
NR_125730.1	chr19	1021521	1021627	107	+	48515	NR_125730.1	RNU6-2	103625684	1.46613	-0.0375966	9.89401	0.00320057	0.156066	up
NM_015167.2	chr17	74714524	74722881	8358	-	47438	NM_015167.2	JMJD6	23210	0.843402	1.93974	9.89089	0.00320487	0.156066	up
NM_174932.2	chr22	32809834	32853373	43540	-	55552	NM_174932.2	BPIFC	254240	-2.13326	-1.17769	10.2297	0.00322757	0.156066	down
NM_005477.2	chr15	73612200	73661605	49406	-	41635	NM_005477.2	HCN4	10021	-1.09021	3.43362	9.87264	0.00323016	0.156066	down
NM_001289.5	chrX	154505496	154563990	58495	-	58074	NM_001289.5	CLIC2	1193	0.989302	5.12801	9.87251	0.00323036	0.156066	up
NM_053050.4	chr2	74699085	74699942	858	-	8461	NM_053050.4	MRPL53	116540	0.299165	6.19482	9.865	0.00324082	0.156066	up
NM_139265.3	chr15	42191638	42264755	73118	-	41225	NM_139265.3	EHD4	30844	0.624401	4.99199	9.85818	0.00325036	0.156066	up
NM_006593.3	chr2	162272605	162282378	9774	+	6956	NM_006593.3	TBR1	10716	-2.35915	2.64556	9.85424	0.00325589	0.156066	down
NM_001130517.2	chr22	37415683	37425863	10181	+	54986	NM_001130517.2	MPST	4357	1.61991	-0.921368	9.84375	0.00327064	0.156066	up
NM_001127183.2	chr2	201983269	202037411	54143	+	7274	NM_001127183.2	CFLAR	8837	0.587552	2.26851	9.84044	0.00327532	0.156066	up
NM_199054.2	chr19	2037470	2051243	13774	-	50490	NM_199054.2	MKNK2	2872	0.539535	6.72281	9.83336	0.00328533	0.156066	up
NM_001971.5	chr12	51722227	51740463	18237	-	36148	NM_001971.5	CELA1	1990	1.95768	-1.36863	10.166	0.00331168	0.156066	up
NM_006764.4	chr3	50325163	50330026	4864	-	11946	NM_006764.4	IFRD2	7866	0.360478	5.28836	9.81139	0.00331662	0.156066	up
NM_002898.3	chr12	56915609	56989980	74372	+	34821	NM_002898.3	RBMS2	5939	0.812706	6.80368	9.81095	0.00331726	0.156066	up
NM_024656.3	chr19	17666403	17693971	27569	+	49044	NM_024656.3	COLGALT1	79709	0.388714	6.14395	9.8092	0.00331977	0.156066	up
NM_001288773.2	chr19	42055886	42093197	37312	+	49609	NM_001288773.2	CEACAM21	90273	1.60999	-0.298987	9.80914	0.00331985	0.156066	up
NM_020923.2	chr2	207139365	207179151	39787	+	7345	NM_020923.2	ZDBF2	57683	-1.93332	-1.05712	9.78937	0.0033483	0.157012	down
NR_120528.1	chr11	35154197	35159579	5383	-	32889	NR_120528.1	LOC100507144	100507144	2.12085	-1.00738	9.78181	0.00335927	0.157135	up
NM_004171.3	chr11	35272752	35441105	168354	-	32890	NM_004171.3	SLC1A2	6506	-1.05271	6.95577	9.76515	0.00338353	0.157879	down
NM_001814.5	chr11	88026760	88070955	44196	-	33578	NM_001814.5	CTSC	1075	0.95828	4.89627	9.74852	0.00340794	0.158625	up
NM_001231.4	chr1	160160285	160171676	11392	+	2023	NM_001231.4	CASQ1	844	-0.631681	2.91745	9.71611	0.00345606	0.160239	down
NR_039742.1	chr16	28969904	28969982	79	+	42564	NR_039742.1	MIR4517	100616487	-1.92929	-1.26103	9.71374	0.00345961	0.160239	down
NM_001290271.1	chr19	55084464	55099027	14564	+	50190	NM_001290271.1	LILRA2	11027	1.72717	-1.2202	9.70665	0.00347024	0.160241	up
NM_002349.3	chr2	160659866	160761267	101402	-	9039	NM_002349.3	LY75	4065	0.766898	2.70928	9.70238	0.00347665	0.160241	up
NM_018142.2	chr8	19674918	19709589	34672	+	23692	NM_018142.2	INTS10	55174	0.278062	6.78368	9.67317	0.00352091	0.161885	up
NM_002258.2	chr12	9747870	9760497	12628	-	35733	NM_002258.2	KLRB1	3820	-1.57231	0.28604	9.6613	0.00353908	0.162324	down
NM_004757.3	chr4	107236853	107270382	33530	+	13733	NM_004757.3	AIMP1	9255	1.97754	-1.31126	9.95812	0.00360342	0.164874	up
NM_001039792.1	chr9	35906189	35907138	950	+	25807	NM_001039792.1	HRCT1	646962	0.691324	3.03678	9.59032	0.00364976	0.165948	up
NM_006834.4	chr6	146864828	146876092	11265	+	19128	NM_006834.4	RAB32	10981	0.593627	4.08991	9.58717	0.00365477	0.165948	up
NR_024048.2	chrX	153639854	153650065	10212	+	56959	NR_024048.2	TAZ	6901	-1.80837	-1.25658	9.91741	0.00366371	0.165948	down
NM_031302.4	chr12	104382761	104457955	75195	-	36680	NM_031302.4	GLT8D2	83468	1.84381	-1.43969	11.1889	0.0036709	0.165948	up
NM_001007024.1	chr17	28804426	28853832	49407	+	44890	NM_001007024.1	GOSR1	9527	1.90824	-1.42813	11.7018	0.0036709	0.165948	up
NM_145273.3	chr17	41924516	41940997	16482	+	45190	NM_145273.3	CD300LG	146894	-1.23528	0.638323	9.56539	0.00368951	0.165956	down
NR_029409.1	chr11	1330938	1331937	1000	+	30723	NR_029409.1	TOLLIP-AS1	255512	0.463715	3.3952	9.55715	0.00370275	0.165956	up
NM_133468.4	chr7	33944523	34195484	250962	+	21199	NM_133468.4	BMPER	168667	-0.626766	4.80422	9.55665	0.00370355	0.165956	down
NM_032251.5	chr11	64107690	64125006	17317	+	31596	NM_032251.5	CCDC88B	283234	0.574198	4.43085	9.54993	0.00371438	0.165956	up
NR_027247.2	chr1	238025475	238091621	66147	+	2897	NR_027247.2	LOC100130331	100130331	-2.33817	-1.03595	9.54949	0.0037151	0.165956	down
NM_020309.3	chr19	49932655	49944808	12154	-	51681	NM_020309.3	SLC17A7	57030	-1.85099	5.46186	9.52343	0.00375745	0.167451	down
NM_001736.3	chr19	47813104	47825327	12224	+	49802	NM_001736.3	C5AR1	728	1.30008	3.45484	9.49776	0.00379967	0.168933	up
NM_024746.3	chr1	222695602	222721444	25843	-	5523	NM_024746.3	HHIPL2	79802	-1.91486	-0.772703	9.48182	0.00382614	0.169428	down
NM_017563.4	chr3	57124010	57199427	75418	-	12058	NM_017563.4	IL17RD	54756	-1.44311	-0.744586	9.47716	0.00383392	0.169428	down
NM_002122.3	chr6	32605183	32611429	6247	+	18323	NM_002122.3	HLA-DQA1	3117	1.16462	3.48475	9.47486	0.00383777	0.169428	up
NM_001130026.2	chr7	143412939	143427173	14235	+	22137	NM_001130026.2	TCAF2	285966	0.995779	1.43725	9.3942	0.0039752	0.174073	up
NR_121620.1	chr8	37263982	37351431	87450	-	24794	NR_121620.1	LINC01605	100507420	1.79905	0.2513	9.39105	0.00398068	0.174073	up
NM_000980.3	chr19	17970687	17974133	3447	+	49052	NM_000980.3	RPL18A	6142	0.544513	1.74893	9.38555	0.00399026	0.174073	up
NM_000728.3	chr11	15095146	15100177	5032	+	30975	NM_000728.3	CALCB	797	1.88854	0.991574	9.38473	0.00399167	0.174073	up
NM_001195081.1	chrX	9935398	9936042	645	+	55909	NM_001195081.1	CLDN34	100288814	-2.02112	-1.17486	9.3843	0.00399243	0.174073	down
NM_018957.3	chr22	38035684	38052050	16367	+	54999	NM_018957.3	SH3BP1	23616	0.836885	3.00957	9.37593	0.00400706	0.174073	up
NM_001199479.1	chr6	28193029	28201265	8237	+	18102	NM_001199479.1	ZSCAN9	7746	-1.81821	-1.19426	9.37076	0.00401612	0.174073	down
NM_014431.2	chr10	72238564	72328206	89643	+	28507	NM_014431.2	PALD1	27143	0.508676	6.69316	9.37028	0.00401696	0.174073	up
NM_000432.3	chr12	111348623	111358404	9782	-	36770	NM_000432.3	MYL2	4633	2.78848	-0.307564	9.36509	0.00402609	0.174073	up
NM_004597.6	chr19	46190712	46195574	4863	-	51525	NM_004597.6	SNRPD2	6633	1.69049	-1.24547	9.35264	0.00404806	0.174622	up
NM_198552.2	chr1	231154704	231175995	21292	-	5622	NM_198552.2	FAM89A	375061	0.658578	5.78167	9.34116	0.00406842	0.1751	up
NR_040093.1	chr5	110847924	111075423	227500	+	15828	NR_040093.1	STARD4-AS1	100505678	-0.673023	0.779364	9.33118	0.00408622	0.175466	down
NM_022728.3	chr7	31377075	31380538	3464	-	22509	NM_022728.3	NEUROD6	63974	-1.78065	1.36125	9.31849	0.00410899	0.176042	down
NR_132344.1	chr9	98868943	98878693	9751	-	27251	NR_132344.1	LOC158434	158434	1.15653	1.58353	9.30668	0.00413029	0.176182	up
NM_003005.3	chr1	169558087	169599377	41291	-	5115	NM_003005.3	SELP	6403	1.46452	-0.163142	9.30292	0.00413709	0.176182	up
NM_015529.3	chr6	132617194	132722673	105480	-	20550	NM_015529.3	MOXD1	26002	-0.910562	7.12217	9.29681	0.00414817	0.176182	down
NM_001039999.2	chr17	18874381	18908060	33680	-	46409	NM_001039999.2	FAM83G	644815	1.0024	1.31202	9.296	0.00414964	0.176182	up
NM_000418.3	chr16	27325230	27376099	50870	+	42524	NM_000418.3	IL4R	3566	1.30893	-0.332579	9.27595	0.00418626	0.177337	up
NR_003133.2	chr1	89873238	89890493	17256	+	1257	NR_003133.2	GBP1P1	400759	1.30248	2.12806	9.26904	0.00419896	0.177476	up
NM_015972.3	chr13	28195916	28197590	1675	+	37093	NM_015972.3	POLR1D	51082	0.394943	4.90875	9.24775	0.00423832	0.178739	up
NM_001305145.1	chr2	193041469	193059659	18191	-	9280	NM_001305145.1	TMEFF2	23671	-1.43419	-0.554665	9.23839	0.00425576	0.179074	down
NM_001318798.1	chr3	50192478	50226508	34031	+	10282	NM_001318798.1	SEMA3F	6405	1.29896	0.128793	9.22393	0.00428284	0.179502	up
NM_014734.3	chr14	70078310	70181861	103552	+	38583	NM_014734.3	SUSD6	9766	0.416395	6.76852	9.2178	0.00429439	0.179502	up
NM_005191.3	chr3	119243140	119278481	35342	-	12328	NM_005191.3	CD80	941	1.68324	-0.760939	9.21775	0.00429448	0.179502	up
NR_135140.1	chr12	42550906	42632170	81265	-	35970	NR_135140.1	YAF2	10138	1.69722	-1.25393	9.18735	0.0043522	0.181189	up
NM_001159749.1	chr5	96502450	96519005	16556	-	17141	NM_001159749.1	RIOK2	55781	1.60766	-0.837193	9.18106	0.00436423	0.181189	up
NM_198153.2	chr6	41196062	41206120	10059	+	18464	NM_198153.2	TREML4	285852	2.00735	-1.29839	9.49038	0.00436606	0.181189	up
NM_004673.3	chr1	178818670	178840215	21546	-	5192	NM_004673.3	ANGPTL1	9068	-0.868201	3.81597	9.17256	0.00438057	0.181189	down
NR_046693.1	chr13	33851691	33855471	3781	+	37123	NR_046693.1	STARD13-AS	100874241	1.625	-1.15775	9.17135	0.0043829	0.181189	up
NM_024600.5	chr16	1583658	1605581	21924	+	42120	NM_024600.5	TMEM204	79652	0.929606	2.58915	9.14504	0.0044339	0.182133	up
NM_000096.3	chr3	148890286	148939832	49547	-	12604	NM_000096.3	CP	1356	1.87417	4.41838	9.13841	0.00444685	0.182133	up
NR_121587.1	chr9	132044695	132047998	3304	+	26467	NR_121587.1	LOC101929331	101929331	1.45125	0.458416	9.13793	0.00444779	0.182133	up
NM_139174.3	chr16	84224723	84230772	6050	+	43206	NM_139174.3	ADAD2	161931	1.92861	-1.31463	9.13744	0.00444875	0.182133	up
NM_001816.3	chr19	43084395	43099082	14688	-	51416	NM_001816.3	CEACAM8	1088	-1.80609	-0.795824	9.13474	0.00445405	0.182133	down
NR_026544.1	chr12	47602203	47610226	8024	-	36010	NR_026544.1	PCED1B-AS1	100233209	1.18123	1.10221	9.12539	0.0044724	0.182488	up
NR_033984.1	chr16	85170756	85183049	12294	+	43224	NR_033984.1	LINC02139	400548	1.30056	0.0997008	9.11413	0.00449462	0.182896	up
NM_001282536.1	chr12	81651754	81906170	254417	-	36520	NM_001282536.1	PPFIA2	8499	-1.94137	-1.19226	9.11021	0.00450239	0.182896	down
NM_018176.3	chr4	25000471	25032414	31944	-	14332	NM_018176.3	LGI2	55203	0.854228	4.45846	9.1011	0.00452049	0.182896	up
NM_002558.3	chr17	3799885	3819960	20076	-	46054	NM_002558.3	P2RX1	5023	0.994097	0.523905	9.10073	0.00452122	0.182896	up
NM_019111.4	chr6	32407619	32412823	5205	+	18322	NM_019111.4	HLA-DRA	3122	1.10661	7.91097	9.09267	0.00453731	0.183154	up
NM_000597.2	chr2	217498127	217529159	31033	+	7427	NM_000597.2	IGFBP2	3485	1.11397	2.63619	9.08517	0.00455231	0.18328	up
NM_001310320.1	chr15	89441914	89456700	14787	-	41902	NM_001310320.1	MFGE8	4240	-1.84258	-0.992306	9.0814	0.00455988	0.18328	down
NM_000441.1	chr7	107301080	107358254	57175	+	21843	NM_000441.1	SLC26A4	5172	-0.55994	2.04446	9.06536	0.00459224	0.184188	down
NM_024599.5	chr17	74466975	74497509	30535	-	47425	NM_024599.5	RHBDF2	79651	2.01809	-1.33287	9.35863	0.00461108	0.184551	up
NM_019593.3	chr20	5525080	5591672	66593	-	53182	NM_019593.3	GPCPD1	56261	-0.615985	6.68814	9.04159	0.00464063	0.18534	down
NM_017723.2	chr9	140172280	140177093	4814	+	26682	NM_017723.2	TOR4A	54863	0.698371	4.58196	9.01289	0.00469979	0.187306	up
NM_005239.5	chr21	40177755	40196879	19125	+	54028	NM_005239.5	ETS2	2114	1.14201	0.426729	9.00379	0.00471872	0.187664	up
NM_002507.3	chr17	47572655	47592382	19728	+	45350	NM_002507.3	NGFR	4804	0.949787	4.69165	8.94435	0.00484435	0.192255	up
NR_073453.1	chr10	128102438	128110448	8011	-	30607	NR_073453.1	LINC00601	101101772	1.17413	-0.0644902	8.93053	0.00487407	0.193028	up
NR_126377.1	chr13	39106137	39260812	154676	-	37705	NR_126377.1	LINC00437	101929121	-1.04622	0.989854	8.92245	0.00489156	0.193314	down
NM_006033.3	chr18	47088401	47119278	30878	+	47885	NM_006033.3	LIPG	9388	1.81793	-1.34949	8.9057	0.00492797	0.194346	up
NM_153337.2	chr16	50700211	50715264	15054	-	43977	NM_153337.2	SNX20	124460	1.65281	-1.06211	8.89972	0.00494104	0.194454	up
NR_038371.1	chr7	53723202	53879624	156423	-	22703	NR_038371.1	LINC01446	401337	-1.90959	-1.34301	9.18537	0.00495614	0.194642	down
NM_003215.2	chr4	48137800	48271814	134015	-	14421	NM_003215.2	TEC	7006	1.06252	0.817821	8.87714	0.00499074	0.195593	up
NR_024009.1	chr22	46691040	46692557	1518	-	55779	NR_024009.1	GTSE1-AS1	NA	0.558482	2.00221	8.85193	0.00504684	0.197382	up
NM_023073.3	chr5	37106330	37249530	143201	-	16781	NM_023073.3	C5orf42	NA	-0.386633	5.81583	8.83342	0.00508848	0.198598	down
NM_001101340.1	chr19	50191942	50194247	2306	+	49935	NM_001101340.1	ADM5	199800	0.586469	3.46136	8.8239	0.00511003	0.198728	up
NM_001172646.1	chr20	9049701	9461463	411763	+	52330	NM_001172646.1	PLCB4	5332	-1.81317	-1.3282	9.11091	0.0051129	0.198728	down
NM_016228.3	chr4	170981373	171011183	29811	-	15096	NM_016228.3	AADAT	51166	-0.748362	0.60141	8.81686	0.00512603	0.198829	down
NM_000915.3	chr20	3052266	3053163	898	+	52243	NM_000915.3	OXT	5020	1.67584	-0.152103	8.80443	0.00515441	0.199519	up
NM_004585.4	chr11	63304273	63313930	9658	+	31535	NM_004585.4	RARRES3	NA	0.865146	6.3398	8.78918	0.00518947	0.200464	up
NR_027086.1	chr1	205523401	205525763	2363	-	5395	NR_027086.1	LOC284578	NA	-0.884655	0.846829	8.78058	0.00520934	0.200821	down
NR_134450.1	chr8	13487199	13490085	2887	+	23662	NR_134450.1	LOC102725080	102725080	1.88486	-1.2564	8.75701	0.00526424	0.202316	up
NM_001270546.1	chr15	86163181	86292589	129409	+	40881	NM_001270546.1	AKAP13	11214	-1.07243	-0.114476	8.75025	0.00528008	0.202316	down
NM_001710.5	chr6	31913721	31919861	6141	+	18299	NM_001710.5	CFB	629	0.946839	5.51593	8.74564	0.00529093	0.202316	up
NM_006678.4	chr17	72537204	72542310	5107	-	47310	NM_006678.4	CD300C	10871	1.50601	0.794389	8.74243	0.0052985	0.202316	up
NR_023384.1	chr7	5013616	5037800	24185	+	20928	NR_023384.1	RNF216P1	441191	-1.67942	-1.30197	8.7392	0.00530612	0.202316	down
NR_125724.1	chr12	66524531	66528229	3699	+	34924	NR_125724.1	LLPH-AS1	NA	1.48469	-0.250635	8.73388	0.00531869	0.202316	up
NM_003641.3	chr11	313991	315272	1282	+	30671	NM_003641.3	IFITM1	8519	0.876527	8.11166	8.72957	0.00532892	0.202316	up
NM_207174.1	chr21	43640008	43717354	77347	+	54077	NM_207174.1	ABCG1	9619	-1.99718	-1.34599	9.00999	0.00533398	0.202316	down
NM_001190702.1	chr11	10529434	10530723	1290	-	32683	NM_001190702.1	MTRNR2L8	100463486	1.63889	3.6897	8.71886	0.00535441	0.202562	up
NR_120522.1	chr7	29238656	29248586	9931	-	22484	NR_120522.1	LOC102724484	102724484	-1.83901	-1.35553	8.71124	0.00537261	0.202562	down
NM_024508.4	chr3	111311747	111314182	2436	-	12260	NM_024508.4	ZBED2	79413	1.47937	2.15941	8.7112	0.00537271	0.202562	up
NM_001252007.1	chr14	96968713	97001934	33222	+	38868	NM_001252007.1	PAPOLA	10914	1.24808	-0.0995188	8.67945	0.00544927	0.20449	up
NM_018946.3	chr9	100818959	100845365	26407	+	26115	NM_018946.3	NANS	54187	0.303104	5.85979	8.67874	0.00545101	0.20449	up
NM_001142470.2	chr6	107349376	107372790	23415	+	18858	NM_001142470.2	C6orf203	51250	-1.82659	-1.38064	8.95312	0.00546309	0.20449	down
NR_104367.2	chr15	57884102	58009755	125654	+	40475	NR_104367.2	GCOM1	145781	1.44624	-1.19522	8.93637	0.00550175	0.20449	up
NR_026859.1	chr15	30395935	30423951	28017	+	40120	NR_026859.1	ULK4P3	89837	-1.68467	-1.36808	8.84039	0.00550291	0.20449	down
NM_152679.3	chr4	48485360	48491541	6182	+	13398	NM_152679.3	SLC10A4	201780	-1.1865	4.69239	8.65335	0.00551309	0.20449	down
NM_002993.3	chr4	74702273	74704477	2205	+	13532	NM_002993.3	CXCL6	6372	1.50247	0.115536	8.6395	0.00554729	0.20449	up
NM_024689.2	chrX	45021555	45060146	38592	-	57221	NM_024689.2	CXorf36	NA	1.07132	2.59845	8.63807	0.00555082	0.20449	up
NM_000265.5	chr7	74188309	74203720	15412	+	21484	NM_000265.5	NCF1	653361	1.83705	-0.925544	8.63796	0.00555109	0.20449	up
NM_004268.4	chr11	93517405	93546496	29092	+	32013	NM_004268.4	MED17	9440	-0.308626	5.76143	8.63738	0.00555254	0.20449	down
NM_052907.3	chr12	125811162	126146923	335762	+	35476	NM_052907.3	TMEM132B	114795	-0.677698	4.54399	8.6372	0.00555297	0.20449	down
NM_024787.3	chr8	33405272	33424646	19375	-	24789	NM_024787.3	RNF122	79845	0.688446	3.03086	8.63678	0.00555403	0.20449	up
NM_001987.4	chr12	11802788	12048336	245549	+	34340	NM_001987.4	ETV6	2120	0.508222	5.32681	8.63116	0.00556798	0.204604	up
NM_001145545.1	chr16	27078219	27080487	2269	+	42520	NM_001145545.1	C16orf82	162083	-1.80929	-1.16873	8.62047	0.00559464	0.205184	down
NM_032849.3	chr13	31480312	31499709	19398	+	37113	NM_032849.3	MEDAG	84935	0.915245	1.3075	8.61305	0.00561321	0.205357	up
NM_000069.2	chr1	201008640	201081694	73055	-	5297	NM_000069.2	CACNA1S	779	-0.776083	2.74875	8.60989	0.00562114	0.205357	down
NM_002089.3	chr4	74962752	74964997	2246	-	14549	NM_002089.3	CXCL2	2920	1.79855	2.46458	8.58463	0.00568497	0.207287	up
NM_030979.2	chr13	25670276	25672705	2430	+	37073	NM_030979.2	PABPC3	5042	0.341615	6.39622	8.579	0.00569931	0.207409	up
NM_001001331.2	chr3	10365707	10547268	181562	-	11484	NM_001001331.2	ATP2B2	491	1.55208	-0.954341	8.56269	0.00574105	0.208525	up
NR_104152.1	chr17	69093915	69198320	104406	-	47287	NR_104152.1	CASC17	101928165	-1.41234	-0.532141	8.55373	0.00576413	0.208961	down
NM_152637.2	chr12	56075330	56078395	3066	+	34770	NM_152637.2	METTL7B	196410	0.868392	2.51413	8.53947	0.00580104	0.209895	up
NR_110054.1	chr7	642482	648139	5658	+	20866	NR_110054.1	LOC101926963	101926963	1.88171	-1.14407	8.53322	0.00581731	0.210081	up
NR_109952.1	chr22	38037839	38054384	16546	-	55616	NR_109952.1	LOC101927051	101927051	1.73513	-1.30677	8.49761	0.00591088	0.212614	up
NM_001287595.1	chr1	53552851	53608304	55454	-	3928	NM_001287595.1	SLC1A7	6512	1.88449	-1.27641	8.49752	0.00591111	0.212614	up
NM_001306093.1	chr18	72907063	72917468	10406	-	48451	NM_001306093.1	ZADH2	284273	-0.78537	-0.13283	8.48987	0.00593144	0.212614	down
NM_021103.3	chr2	85132763	85133799	1037	+	6399	NM_021103.3	TMSB10	9168	0.403516	9.96777	8.48864	0.00593471	0.212614	up
NR_120647.1	chr10	67331183	67526299	195117	+	28422	NR_120647.1	LINC01515	101928913	-1.34249	0.162738	8.48269	0.00595058	0.212614	down
NM_001323544.1	chr16	88880142	88923378	43237	-	44353	NM_001323544.1	GALNS	2588	-1.65487	-1.19854	8.47742	0.00596467	0.212614	down
NR_026716.2	chr19	55043909	55057050	13142	+	50186	NR_026716.2	KIR3DX1	90011	-2.4803	-0.354897	8.47677	0.00596641	0.212614	down
NM_006645.2	chr11	72465774	72504750	38977	-	33446	NM_006645.2	STARD10	10809	0.42001	7.30483	8.4558	0.00602282	0.213523	up
NR_110000.1	chr3	70048895	70064452	15558	+	10482	NR_110000.1	SAMMSON	101927152	-1.02728	0.0931949	8.45231	0.00603225	0.213523	down
NM_024954.4	chr10	99258639	99330967	72329	+	28860	NM_024954.4	UBTD1	80019	0.39961	5.96316	8.44782	0.00604445	0.213523	up
NM_005873.2	chr20	62704534	62710845	6312	-	53818	NM_005873.2	RGS19	10287	1.13668	0.127362	8.44715	0.00604626	0.213523	up
NR_038353.1	chr5	177433967	177476088	42122	+	16560	NR_038353.1	FAM153C	NA	-1.80978	-1.37854	8.71226	0.00604855	0.213523	down
NM_006270.4	chr19	50138549	50143400	4852	-	51686	NM_006270.4	RRAS	6237	0.525968	6.30157	8.42686	0.00610161	0.214993	up
NR_145132.1	chr13	44359764	44361116	1353	-	37749	NR_145132.1	ENOX1	55068	-0.714965	1.82725	8.41564	0.00613246	0.215677	down
NM_006080.2	chr7	83587659	83824217	236559	-	22883	NM_006080.2	SEMA3A	10371	-0.870463	5.59746	8.40737	0.00615531	0.216078	down
NM_018226.4	chr2	241508004	241518149	10146	+	7711	NM_018226.4	RNPEPL1	57140	0.511929	7.17803	8.39887	0.00617889	0.216134	up
NM_005953.3	chr16	56642478	56643409	932	+	42804	NM_005953.3	MT2A	4502	0.992644	9.01037	8.39852	0.00617985	0.216134	up
NM_001080483.2	chr9	136379708	136390068	10361	-	27699	NM_001080483.2	TMEM8C	NA	1.29284	0.948655	8.39358	0.0061936	0.216214	up
NM_001009.3	chr19	58898636	58906171	7536	+	50424	NM_001009.3	RPS5	6193	0.280214	8.47576	8.37435	0.00624742	0.21769	up
NM_002381.4	chr2	20191813	20212455	20643	-	7906	NM_002381.4	MATN3	4148	0.900345	4.64691	8.36397	0.00627667	0.218024	up
NR_136910.1	chr12	123868663	123893900	25238	+	35447	NR_136910.1	KMT5A	387893	-1.88046	-1.35041	8.62386	0.00628014	0.218024	down
NR_046598.1	chr3	192232811	192234362	1552	+	11347	NR_046598.1	FGF12-AS3	100873988	-1.77631	-1.38271	8.61617	0.00630074	0.218337	down
NM_024310.4	chr19	30156327	30166384	10058	+	49201	NM_024310.4	PLEKHF1	79156	0.62984	4.7817	8.34632	0.00632678	0.2185	up
NM_013348.3	chr19	48958964	48969367	10404	+	49838	NM_013348.3	KCNJ14	3770	-0.947312	4.33232	8.34567	0.00632862	0.2185	down
NM_022766.5	chr22	47080307	47134152	53846	-	55781	NM_022766.5	CERK	64781	0.33806	7.47843	8.32321	0.00639302	0.219487	up
NM_001201543.1	chr2	62051983	62081278	29296	-	8299	NM_001201543.1	FAM161A	84140	-1.73524	-1.3978	8.58196	0.00639326	0.219487	down
NM_000910.3	chr4	156129781	156138230	8450	+	13967	NM_000910.3	NPY2R	4887	-1.77427	2.41649	8.31954	0.00640361	0.219487	down
NM_014079.3	chr3	126061478	126076236	14759	-	12422	NM_014079.3	KLF15	28999	0.562998	7.18633	8.31947	0.00640379	0.219487	up
NM_004907.2	chr19	13261282	13265722	4441	+	48926	NM_004907.2	IER2	9592	-0.660551	6.72106	8.30504	0.00644561	0.220034	down
NR_026845.1	chr21	33765442	33766269	828	+	53929	NR_026845.1	URB1-AS1	84996	0.357421	4.46489	8.30274	0.00645229	0.220034	up
NM_001278718.1	chr19	35630538	35633959	3422	+	49300	NM_001278718.1	FXYD1	5348	0.869458	2.1983	8.29996	0.00646038	0.220034	up
NM_016558.3	chr20	34541539	34543281	1743	-	53439	NM_016558.3	SCAND1	51282	0.51239	2.46652	8.29306	0.00648055	0.220034	up
NR_135681.1	chr15	42184975	42191013	6039	+	40254	NR_135681.1	LOC105370792	105370792	0.668133	2.85169	8.2898	0.00649008	0.220034	up
NR_125406.1	chr3	46406151	46448550	42400	-	11771	NR_125406.1	LOC102724297	102724297	1.33102	0.572333	8.28949	0.00649099	0.220034	up
NM_001287429.1	chr7	48128737	48148330	19594	+	21291	NM_001287429.1	UPP1	7378	1.84258	-1.17219	8.54256	0.00650162	0.220034	up
NM_015669.4	chr5	140514788	140517709	2922	+	16170	NM_015669.4	PCDHB5	26167	-0.426647	4.59116	8.28195	0.00651312	0.220034	down
NM_019010.2	chr17	39032141	39041495	9355	-	46742	NM_019010.2	KRT20	54474	-1.79186	-1.34714	8.27105	0.00654523	0.220723	down
NM_001497.3	chr9	33110639	33167356	56718	-	26859	NM_001497.3	B4GALT1	2683	0.684397	5.4589	8.24843	0.00661244	0.221811	up
NR_132979.1	chr22	41469612	41469725	114	-	55686	NR_132979.1	SNORD140	106635682	1.77834	-1.38627	8.50192	0.00661548	0.221811	up
NM_001278162.1	chr11	33279877	33378569	98693	+	31092	NM_001278162.1	HIPK3	10114	1.29938	0.0134414	8.24458	0.00662396	0.221811	up
NM_001486.3	chr2	27719706	27746551	26846	+	5963	NM_001486.3	GCKR	2646	1.16542	-0.301971	8.23304	0.0066586	0.221811	up
NM_005746.2	chr7	105888731	105925638	36908	-	23157	NM_005746.2	NAMPT	10135	0.630148	6.78366	8.23281	0.0066593	0.221811	up
NM_001003841.2	chr5	1201710	1225232	23523	+	15226	NM_001003841.2	SLC6A19	340024	2.21648	-1.17361	8.48451	0.00666491	0.221811	up
NM_004823.1	chr19	38810484	38819654	9171	+	49502	NM_004823.1	KCNK6	9424	0.844082	2.45423	8.229	0.00667079	0.221811	up
NR_120638.1	chr10	14116283	14129880	13598	+	27989	NR_120638.1	LOC101928453	101928453	-1.78639	-1.28226	8.22599	0.00667988	0.221811	down
NR_108074.1	chr10	6816265	6821142	4878	-	29307	NR_108074.1	LINC00706	100652997	1.05748	2.31486	8.22256	0.00669024	0.221811	up
NM_020882.2	chr20	61924538	61962285	37748	+	53000	NM_020882.2	COL20A1	57642	-0.92216	3.75297	8.22093	0.00669516	0.221811	down
NM_139245.3	chr3	160473992	160796695	322704	+	11130	NM_139245.3	PPM1L	151742	-0.642573	2.02901	8.19436	0.00677612	0.224099	down
NM_144966.5	chr9	14734664	14910993	176330	-	26755	NM_144966.5	FREM1	158326	-0.994563	0.87241	8.18868	0.00679359	0.224284	down
NM_001336.3	chr20	57570242	57582309	12068	-	53741	NM_001336.3	CTSZ	1522	0.374166	7.65057	8.17446	0.00683746	0.225337	up
NM_002563.4	chr3	152552482	152559228	6747	+	11064	NM_002563.4	P2RY1	5028	-0.545602	7.57372	8.16445	0.00686851	0.225966	down
NM_001101404.1	chr15	78384927	78396393	11467	+	40760	NM_001101404.1	SH2D7	646892	0.816021	0.941587	8.15065	0.00691162	0.226965	up
NM_177454.3	chr2	187558789	187628514	69726	+	7162	NM_177454.3	FAM171B	165215	-0.541937	8.98492	8.14703	0.00692297	0.226965	down
NM_019110.4	chr6	28209483	28220074	10592	-	19595	NM_019110.4	ZKSCAN4	387032	-0.604216	0.97147	8.136	0.00695767	0.227707	down
NM_005468.2	chr11	64812295	64826009	13715	-	33258	NM_005468.2	NAALADL1	10004	0.818189	2.84644	8.12573	0.00699014	0.227996	up
NM_153647.3	chr14	92789537	92967825	178289	+	38801	NM_153647.3	SLC24A4	123041	1.51609	-0.909511	8.12556	0.0069907	0.227996	up
NM_014624.3	chr1	153507076	153508717	1642	-	4672	NM_014624.3	S100A6	6277	0.578099	8.1049	8.10143	0.00706764	0.230107	up
NM_001323292.1	chr5	63461670	63631758	170089	+	15514	NM_001323292.1	RNF180	285671	-0.454503	3.12425	8.09056	0.00710262	0.230429	down
NR_046570.1	chr3	183724126	183729207	5082	+	11226	NR_046570.1	ABCC5-AS1	100873982	1.90381	-1.14803	8.08985	0.00710491	0.230429	up
NM_001253845.1	chr22	50920153	50924866	4714	+	55221	NM_001253845.1	ADM2	79924	1.55281	-1.03258	8.08239	0.00712901	0.230429	up
NM_003863.3	chr9	130697374	130700763	3390	-	27567	NM_003863.3	DPM2	8818	0.318402	6.58781	8.08142	0.00713214	0.230429	up
NM_001303474.1	chr7	1094911	1098905	3995	+	20878	NM_001303474.1	GPR146	115330	1.35268	-0.244024	8.07942	0.00713863	0.230429	up
NM_183377.1	chr17	31340105	31620006	279902	-	46559	NM_183377.1	ASIC2	40	-1.15247	1.97035	8.06622	0.00718159	0.230885	down
NR_109980.1	chr7	116712126	116730835	18710	-	23215	NR_109980.1	ST7-AS2	93654	1.51428	-0.307204	8.06588	0.00718269	0.230885	up
NM_004466.5	chr13	92050873	93519490	1468618	+	37377	NM_004466.5	GPC5	2262	-0.428397	7.25213	8.06378	0.00718953	0.230885	down
NR_039602.1	chr8	94928250	94928347	98	-	25148	NR_039602.1	MIR378D2	100616169	2.01915	-1.27506	8.29147	0.00724064	0.231547	up
NR_110842.1	chr6	5665218	5695505	30288	-	19407	NR_110842.1	LOC101927950	101927950	2.2641	-0.799988	8.04745	0.00724312	0.231547	up
NM_000196.3	chr16	67465036	67471456	6421	+	42980	NM_000196.3	HSD11B2	3291	1.12395	3.22582	8.04573	0.00724876	0.231547	up
NM_002095.4	chr8	30436031	30515738	79708	-	24773	NM_002095.4	GTF2E2	2961	0.300798	5.62473	8.04255	0.00725925	0.231547	up
NM_016562.3	chrX	12885202	12908480	23279	+	55927	NM_016562.3	TLR7	51284	1.17111	3.60258	8.02699	0.00731083	0.232347	up
NM_000371.3	chr18	29171730	29178987	7258	+	47783	NM_000371.3	TTR	7276	-2.44129	5.87642	8.01849	0.00733916	0.232347	down
NM_000916.3	chr3	8792094	8811300	19207	-	11438	NM_000916.3	OXTR	5021	1.16497	5.87	8.01732	0.00734305	0.232347	up
NM_000558.4	chr16	226650	227521	872	+	42034	NM_000558.4	HBA1	3039	1.3595	6.68221	8.01678	0.00734488	0.232347	up
NR_105003.1	chr5	67485704	67494235	8532	+	15557	NR_105003.1	LOC102467655	NA	1.56575	-1.25825	8.01645	0.00734597	0.232347	up
NM_001276274.1	chr11	695591	705028	9438	+	30692	NM_001276274.1	TMEM80	283232	1.69906	-1.35731	9.13674	0.00739487	0.233279	up
NM_014963.2	chr19	1107633	1174282	66650	-	50464	NM_014963.2	SBNO2	22904	0.796735	1.21329	7.99809	0.00740763	0.233279	up
NM_022153.1	chr10	73507313	73533337	26025	-	29944	NM_022153.1	VSIR	64115	0.819146	8.8696	7.99663	0.00741256	0.233279	up
NR_027761.1	chrX	40690470	40692449	1980	-	57211	NR_027761.1	LOC100132831	100132831	0.951345	0.31038	7.99094	0.0074318	0.233314	up
NM_002448.3	chr4	4861392	4865663	4272	+	13151	NM_002448.3	MSX1	4487	1.09489	5.16965	7.98898	0.00743842	0.233314	up
NM_133261.2	chr19	3585569	3593539	7971	+	48601	NM_133261.2	GIPC3	126326	0.903611	3.24352	7.98017	0.00746836	0.233864	up
NM_001347864.1	chr10	134973958	134984124	10167	+	29216	NM_001347864.1	KNDC1	85442	-1.1103	0.329459	7.94982	0.0075724	0.236728	down
NM_001080505.1	chr4	42399856	42404504	4649	+	13382	NM_001080505.1	SHISA3	152573	0.913909	3.44515	7.94065	0.00760413	0.237327	up
NM_207352.3	chr4	187112674	187134617	21944	+	14118	NM_207352.3	CYP4V2	285440	-0.375873	7.01155	7.93421	0.00762652	0.237632	down
NM_080283.3	chr17	66970773	67057136	86364	-	47279	NM_080283.3	ABCA9	10350	-0.693289	4.55115	7.92658	0.00765313	0.237739	down
NM_001042588.1	chr15	75890424	75918719	28296	-	41731	NM_001042588.1	SNUPN	10073	-1.64935	-1.07954	7.91828	0.00768217	0.237739	down
NM_152280.4	chr1	155829260	155854990	25731	+	1909	NM_152280.4	SYT11	23208	-0.308361	11.2869	7.91718	0.00768602	0.237739	down
NM_002839.3	chr9	8314246	10612723	2298478	-	26740	NM_002839.3	PTPRD	5789	-0.600072	2.95661	7.91366	0.00769838	0.237739	down
NM_020781.3	chr7	148823508	148880134	56627	+	22161	NM_020781.3	ZNF398	57541	-1.40918	-0.450942	7.91033	0.00771012	0.237739	down
NM_024578.2	chr19	17337013	17340028	3016	+	49017	NM_024578.2	OCEL1	79629	0.351586	5.24272	7.90999	0.0077113	0.237739	up
NM_153048.3	chr6	111981535	112080334	98800	-	20464	NM_153048.3	FYN	2534	1.68431	-1.33641	8.14163	0.0077246	0.237739	up
NM_015311.2	chr2	220415450	220436268	20819	-	9546	NM_015311.2	OBSL1	23363	0.467567	3.81868	7.90445	0.00773085	0.237739	up
NM_003311.3	chr11	2949503	2950650	1148	-	32513	NM_003311.3	PHLDA2	7262	0.780919	1.80118	7.89544	0.00776271	0.237878	up
NM_003268.5	chr1	223282748	223316624	33877	-	5528	NM_003268.5	TLR5	7100	0.774989	2.94881	7.89187	0.00777538	0.237878	up
NM_001080504.2	chr2	238707388	238751451	44064	+	7679	NM_001080504.2	RBM44	375316	1.49797	-1.0502	7.89001	0.00778199	0.237878	up
NR_110647.1	chr9	71568004	71590757	22754	-	27053	NR_110647.1	LOC101927069	101927069	1.15341	0.898697	7.88624	0.00779543	0.237878	up
NM_004227.3	chr7	6201410	6312242	110833	-	22363	NM_004227.3	CYTH3	9265	-0.325518	7.75123	7.88539	0.00779844	0.237878	down
NM_006039.4	chr17	60704762	60770962	66201	+	45545	NM_006039.4	MRC2	9902	-0.460382	7.40467	7.87596	0.00783215	0.23852	down
NM_002263.3	chr6	33359313	33377701	18389	+	18355	NM_002263.3	KIFC1	3833	0.976391	1.12703	7.86724	0.00786342	0.238977	up
NM_014571.3	chr1	40089103	40105348	16246	-	3676	NM_014571.3	HEYL	26508	0.563818	6.54007	7.86472	0.0078725	0.238977	up
NM_005609.3	chr11	64513861	64527769	13909	-	33218	NM_005609.3	PYGM	5837	-0.725111	2.69606	7.85241	0.00791694	0.239939	down
NR_135280.1	chr13	111462023	111465431	3409	-	38077	NR_135280.1	LINC00567	283486	-1.24523	-0.594684	7.84749	0.00793477	0.240094	down
NM_003412.3	chr3	147127181	147134506	7326	+	11012	NM_003412.3	ZIC1	7545	-0.44302	6.83776	7.82423	0.00801971	0.241673	down
NM_002221.3	chr1	226819391	226926876	107486	-	5561	NM_002221.3	ITPKB	3707	0.601285	10.4465	7.82292	0.00802454	0.241673	up
NM_022059.3	chr17	4636824	4643223	6400	-	46078	NM_022059.3	CXCL16	58191	0.734885	5.2741	7.82268	0.00802542	0.241673	up
NM_001827.2	chr9	91926110	91931618	5509	+	26019	NM_001827.2	CKS2	1164	0.759516	2.24048	7.81719	0.00804563	0.241895	up
NM_152796.2	chr19	46801633	46841797	40165	+	49775	NM_152796.2	HIF3A	64344	0.850626	1.60225	7.80139	0.00810409	0.243069	up
NM_013248.2	chr20	23331373	23335408	4036	+	52435	NM_013248.2	NXT1	29107	0.372935	4.32033	7.79967	0.00811046	0.243069	up
NM_002686.4	chr17	37824706	37826728	2023	+	45042	NM_002686.4	PNMT	5409	0.660246	2.9136	7.77249	0.00821217	0.245726	up
NR_027064.2	chr19	5558178	5568045	9868	-	50582	NR_027064.2	TINCR	257000	-0.907914	4.1103	7.76336	0.00824661	0.246155	down
NM_001278355.1	chr12	69864129	69973573	109445	+	34964	NM_001278355.1	FRS2	10818	-1.65991	-1.36579	7.98933	0.00825259	0.246155	down
NM_024430.3	chr18	43563502	43652250	88749	-	48266	NM_024430.3	PSTPIP2	9050	1.00922	2.41019	7.75409	0.00828179	0.246635	up
NR_134635.1	chr6	137105185	137107192	2008	+	19075	NR_134635.1	LOC101928429	101928429	1.1656	0.456039	7.74297	0.00832418	0.247198	up
NM_000972.2	chr9	136215069	136218280	3212	+	26549	NM_000972.2	RPL7A	6130	0.304932	6.99947	7.74225	0.00832691	0.247198	up
NM_001080466.1	chr17	72352555	72357958	5404	-	47308	NM_001080466.1	BTBD17	388419	-0.659835	4.74748	7.73471	0.00835578	0.247352	down
NM_004004.5	chr13	20761602	20767114	5513	-	37549	NM_004004.5	GJB2	2706	-0.725829	3.20964	7.73405	0.00835834	0.247352	down
NM_003725.3	chr12	57157002	57181574	24573	+	34822	NM_003725.3	HSD17B6	8630	-0.567446	6.69647	7.72882	0.00837841	0.247557	down
NR_027337.1	chr1	120906034	120914842	8809	+	1573	NR_027337.1	HIST2H2BA	337875	1.43813	-1.22108	8.44783	0.00842727	0.248611	up
NM_133478.2	chr2	74443369	74570534	127166	-	8443	NM_133478.2	SLC4A5	57835	0.741049	2.03648	7.71135	0.00844597	0.248773	up
NM_006564.1	chr3	45984973	45989845	4873	+	10194	NM_006564.1	CXCR6	10663	-1.61224	-0.714322	7.6921	0.00852103	0.250593	down
NR_077225.1	chr12	96043031	96067775	24745	+	35095	NR_077225.1	PGAM1P5	100132594	-1.6785	-1.21053	7.68666	0.00854239	0.25062	down
NM_001301084.1	chr11	120256003	120360645	104643	+	32272	NM_001301084.1	ARHGEF12	23365	-1.60167	-1.17277	7.68509	0.00854854	0.25062	down
NM_022776.4	chr3	125247702	125314381	66680	-	12407	NM_022776.4	OSBPL11	114885	0.587955	6.91598	7.66287	0.00863641	0.252367	up
NM_032704.4	chr12	49658782	49667121	8340	+	34582	NM_032704.4	TUBA1C	84790	1.70257	0.68242	7.65996	0.00864798	0.252367	up
NR_045483.1	chr1	46899499	46911374	11876	+	905	NR_045483.1	FAAHP1	729041	1.02168	0.296039	7.6567	0.00866098	0.252367	up
NM_207422.2	chrX	71364034	71381600	17567	+	56390	NM_207422.2	FLJ44635	392490	0.307406	7.08933	7.65652	0.00866167	0.252367	up
NM_005439.2	chr12	6857158	6862082	4925	-	35661	NM_005439.2	MLF2	8079	1.56668	-1.33542	8.07281	0.00867765	0.25244	up
NM_152418.3	chr8	88882971	88886296	3326	-	25108	NM_152418.3	DCAF4L2	138009	1.55958	-1.37446	7.87002	0.0086935	0.25244	up
NR_110207.1	chr2	47441088	47572213	131126	-	8203	NR_110207.1	LOC101927043	NA	1.16121	-0.112775	7.64585	0.00870435	0.25244	up
NR_027283.1	chr17	66194801	66196443	1643	+	45604	NR_027283.1	LOC440461	NA	1.23006	-0.377056	7.64207	0.0087195	0.252491	up
NR_130941.1	chr2	176788620	176867567	78948	-	9168	NR_130941.1	LNPK	80856	-0.797319	0.116858	7.62531	0.0087871	0.254058	down
NR_073085.1	chr14	105943583	105946507	2925	+	39106	NR_073085.1	CRIP2	1397	1.13393	0.806441	7.61684	0.0088215	0.254427	up
NM_006098.4	chr5	180663928	180670906	6979	-	17842	NM_006098.4	RACK1	10399	0.248343	9.8062	7.61551	0.00882688	0.254427	up
NM_001308043.1	chr2	201980827	202004600	23774	+	7268	NM_001308043.1	CFLAR	8837	0.700928	2.54064	7.60878	0.00885431	0.254828	up
NM_153487.3	chr6	37600284	37665766	65483	-	19935	NM_153487.3	MDGA1	266727	-0.457661	6.04859	7.60261	0.00887956	0.255165	down
NM_002275.3	chr17	39669997	39675270	5274	-	46781	NM_002275.3	KRT15	3866	1.63775	-0.497855	7.57923	0.00897586	0.25754	up
NM_001320634.1	chr2	127805599	127839641	34043	-	8828	NM_001320634.1	BIN1	274	1.17482	-0.259081	7.56415	0.00903854	0.258945	up
NM_021105.2	chr3	146232967	146262628	29662	-	12589	NM_021105.2	PLSCR1	5359	0.927865	6.37077	7.5491	0.00910163	0.260356	up
NM_017914.3	chr19	1275520	1279243	3724	+	48538	NM_017914.3	C19orf24	55009	0.42257	6.16512	7.54426	0.009122	0.260361	up
NM_001136018.3	chr1	225997776	226033264	35489	+	2747	NM_001136018.3	EPHX1	2052	-1.53836	-1.41817	8.18135	0.00912943	0.260361	down
NM_003853.3	chr2	103035250	103069025	33776	+	6570	NM_003853.3	IL18RAP	8807	1.36024	-0.317659	7.5319	0.00917426	0.261245	up
NM_001080404.2	chr19	12154620	12163782	9163	-	50801	NM_001080404.2	ZNF878	729747	1.60036	-0.901036	7.52554	0.00920127	0.261292	up
NM_001319052.1	chr3	16258283	16271672	13390	+	9921	NM_001319052.1	GALNT15	117248	0.644214	3.26629	7.52499	0.00920363	0.261292	up
NM_002135.4	chr12	52445186	52453291	8106	+	34668	NM_002135.4	NR4A1	3164	-1.50184	-0.518607	7.50613	0.00928422	0.263183	down
NM_000537.3	chr1	204123944	204135465	11522	-	5368	NM_000537.3	REN	5972	-1.4727	-0.670737	7.50099	0.00930633	0.263414	down
NM_025261.2	chr6	31686425	31689511	3087	-	19733	NM_025261.2	LY6G6C	80740	1.42297	0.283141	7.49244	0.00934327	0.264063	up
NR_026655.1	chr12	54452038	54516018	63981	+	34732	NR_026655.1	FLJ12825	440101	-1.49404	-1.17832	7.48704	0.00936663	0.264327	down
NM_080817.4	chrX	41583408	41589388	5981	+	56085	NM_080817.4	GPR82	27197	1.29459	0.823021	7.48349	0.00938203	0.26436	up
NM_000229.1	chr16	67973787	67978015	4229	-	44132	NM_000229.1	LCAT	3931	0.729878	3.79979	7.47782	0.00940672	0.26436	up
NM_003256.3	chr3	12194568	12200851	6284	-	11505	NM_003256.3	TIMP4	7079	0.721244	4.77764	7.4751	0.00941858	0.26436	up
NM_139284.2	chr19	35615417	35626178	10762	-	51122	NM_139284.2	LGI4	163175	0.644811	8.16215	7.47388	0.0094239	0.26436	up
NM_138961.2	chr11	124623019	124632223	9205	-	33975	NM_138961.2	ESAM	90952	0.592513	7.64685	7.46749	0.00945182	0.264749	up
NR_132748.1	chr5	159895258	159914433	19176	+	16397	NR_132748.1	MIR3142HG	107075116	1.64653	-1.26335	7.45766	0.00949496	0.265563	up
NM_001321042.1	chr10	134494779	134596984	102206	+	29212	NM_001321042.1	INPP5A	3632	1.02767	2.57023	7.44836	0.00953597	0.266313	up
NM_001277378.1	chr19	14192444	14196607	4164	-	50879	NM_001277378.1	C19orf67	646457	1.50506	-1.12129	7.44519	0.00955002	0.266313	up
NM_001281513.1	chr2	26467616	26513333	45718	+	5904	NM_001281513.1	HADHB	3032	-1.6482	-1.38413	7.43666	0.00958785	0.266938	down
NM_015634.3	chr10	70748477	70776739	28263	+	28468	NM_015634.3	KIF1BP	26128	-0.300326	7.70053	7.43376	0.00960075	0.266938	down
NM_001198558.1	chr19	51628137	51639520	11384	+	49997	NM_001198558.1	SIGLEC9	27180	1.69978	-0.693679	7.42684	0.00963162	0.267282	up
NM_173627.4	chr17	78388967	78411886	22920	+	45870	NM_173627.4	ENDOV	284131	-1.39504	-1.05923	7.42463	0.0096415	0.267282	down
NM_001005176.2	chr2	231090445	231103793	13349	+	7549	NM_001005176.2	SP140	11262	1.69582	-1.13617	7.42002	0.00966213	0.267461	up
NM_017947.2	chr18	33767480	33848685	81206	+	47838	NM_017947.2	MOCOS	55034	0.846027	0.909474	7.41512	0.00968415	0.267677	up
NR_038434.1	chr2	13106908	13147138	40231	-	7881	NR_038434.1	LOC100506474	100506474	-0.916082	0.491893	7.41137	0.00970099	0.26775	down
NM_002224.3	chr6	33589156	33664351	75196	+	18364	NM_002224.3	ITPR3	3710	0.577883	5.73431	7.38627	0.00981476	0.270459	up
NM_001271779.1	chr3	63996225	64009282	13058	-	12100	NM_001271779.1	PSMD6	9861	1.40951	-0.68693	7.3834	0.00982783	0.270459	up
NM_000603.4	chr7	150688144	150711687	23544	+	22199	NM_000603.4	NOS3	4846	0.773276	4.67996	7.37252	0.00987766	0.271434	up
NR_003369.2	chr16	29086163	29128039	41877	+	42574	NR_003369.2	RRN3P2	653390	-1.28098	-0.398704	7.36565	0.00990924	0.271905	down
NR_073178.1	chr17	76257430	76274573	17144	-	47455	NR_073178.1	LINC01993	100996291	1.56271	-1.35161	7.56673	0.00993351	0.272175	up
NM_001739.1	chr16	87921625	87970112	48488	-	44339	NM_001739.1	CA5A	763	1.03314	0.185784	7.34952	0.00998383	0.272598	up
NM_000642.2	chr1	100315640	100389579	73940	+	1341	NM_000642.2	AGL	178	-0.812396	0.184684	7.34835	0.00998927	0.272598	down
NM_024081.5	chr11	32851481	32879669	28189	+	31081	NM_024081.5	PRRG4	79056	0.637287	3.7378	7.34769	0.00999232	0.272598	up
NM_015910.5	chr2	63348518	63815867	467350	-	8310	NM_015910.5	WDPCP	51057	-0.502246	1.25557	7.34231	0.0100173	0.272886	down
NM_002175.2	chr9	21165636	21166659	1024	-	26792	NM_002175.2	IFNA21	3452	-1.62363	-1.26189	7.33184	0.0100663	0.273823	down
NR_026955.1	chr13	44596471	44604599	8129	+	37185	NR_026955.1	LINC00284	121838	1.25876	0.34996	7.3226	0.0101097	0.274287	up
NM_001463.3	chr2	183698002	183731498	33497	-	9239	NM_001463.3	FRZB	2487	-0.519722	6.56299	7.32201	0.0101124	0.274287	down
NR_026676.1	chr7	23530007	23531047	1041	+	21075	NR_026676.1	RPS2P32	256355	0.469198	2.01026	7.30806	0.0101784	0.275563	up
NM_006922.3	chr2	165944030	166060577	116548	-	9076	NM_006922.3	SCN3A	6328	1.59247	-1.32771	7.30587	0.0101887	0.275563	up
NM_022159.3	chr1	79355449	79472495	117047	-	4100	NM_022159.3	ADGRL4	64123	0.943891	6.41213	7.29761	0.010228	0.276006	up
NM_006877.3	chr6	16238811	16295780	56970	+	17969	NM_006877.3	GMPR	2766	0.95234	6.1881	7.29511	0.0102399	0.276006	up
NM_001003927.2	chr17	29643428	29648767	5340	-	46548	NM_001003927.2	EVI2A	2123	1.61278	-1.2274	7.29321	0.010249	0.276006	up
NM_003823.3	chr20	62328004	62330051	2048	+	53013	NM_003823.3	TNFRSF6B	8771	1.49144	-0.572615	7.28645	0.0102813	0.276394	up
NM_001167608.1	chr2	227700671	227863926	163256	+	7525	NM_001167608.1	RHBDD1	84236	-0.74056	0.430352	7.28407	0.0102927	0.276394	down
NM_001144990.1	chr4	37246690	37451087	204398	+	13303	NM_001144990.1	NWD2	57495	-1.72711	1.15067	7.27702	0.0103266	0.276701	down
NR_003207.1	chr14	101438440	101438513	74	+	38950	NR_003207.1	SNORD114-14	767592	1.67966	-1.38991	7.47386	0.0103506	0.276701	up
NM_001083604.1	chr9	98205264	98270322	65059	-	27243	NM_001083604.1	PTCH1	5727	-1.69804	-1.36255	7.47275	0.0103557	0.276701	down
NM_001029858.3	chr6	118228689	118638839	410151	+	18941	NM_001029858.3	SLC35F1	222553	-0.475011	7.50113	7.26721	0.010374	0.276701	down
NM_001322865.1	chr1	24742240	24781314	39075	+	416	NM_001322865.1	NIPAL3	57185	1.29233	-0.846946	7.26647	0.0103776	0.276701	up
NM_002616.2	chr17	8043788	8055753	11966	-	46229	NM_002616.2	PER1	5187	0.383695	7.60516	7.2578	0.0104196	0.277101	up
NM_000634.2	chr2	219027568	219031716	4149	-	9476	NM_000634.2	CXCR1	3577	1.00623	1.03308	7.25056	0.0104549	0.277101	up
NM_020981.3	chr2	168675182	168727366	52185	+	6984	NM_020981.3	B3GALT1	8708	-0.72764	3.66082	7.24959	0.0104596	0.277101	down
NM_001003938.3	chr16	215973	216767	795	+	42032	NM_001003938.3	HBM	3042	1.15855	0.665931	7.2489	0.010463	0.277101	up
NM_001766.3	chr1	158149737	158156217	6481	+	1975	NM_001766.3	CD1D	912	1.55446	-1.34444	7.24827	0.0104661	0.277101	up
NM_001159522.1	chr7	63505821	63538927	33107	+	21355	NM_001159522.1	ZNF727	442319	-0.766667	1.92303	7.24472	0.0104834	0.277171	down
NM_178229.4	chr1	156495197	156542396	47200	-	4880	NM_178229.4	IQGAP3	128239	1.47343	0.159763	7.23821	0.0105153	0.277625	up
NM_001242811.1	chr6	90272037	90343553	71517	+	18801	NM_001242811.1	ANKRD6	22881	-1.36684	-0.616241	7.22812	0.010565	0.278546	down
NM_001137601.2	chr14	105267518	105271049	3532	+	39084	NM_001137601.2	ZBTB42	100128927	0.642759	3.25101	7.21879	0.0106111	0.2791	up
NM_145176.2	chr6	134308719	134373789	65071	-	20575	NM_145176.2	SLC2A12	154091	-0.337343	6.45687	7.20895	0.01066	0.2791	down
NR_026964.3	chr9	139216998	139221779	4782	-	27734	NR_026964.3	DKFZP434A062	26102	0.860255	1.18078	7.20466	0.0106814	0.2791	up
NM_001297652.1	chr6	30850390	30867933	17544	+	18199	NM_001297652.1	DDR1	780	1.6251	-1.1737	7.20392	0.0106851	0.2791	up
NM_001184801.1	chr6	42531760	42588089	56330	+	18485	NM_001184801.1	UBR2	23304	-1.7214	-1.19778	7.39419	0.0107236	0.2791	down
NR_051987.1	chr4	139230865	139345498	114634	+	13871	NR_051987.1	LINC00499	100874047	0.910367	1.5991	7.19274	0.010741	0.2791	up
NM_000879.2	chr5	131877136	131879214	2079	-	17293	NM_000879.2	IL5	3567	-1.50879	-1.30456	7.43668	0.0107514	0.2791	down
NM_004843.3	chr19	14142552	14163731	21180	+	48948	NM_004843.3	IL27RA	9466	0.632569	4.15807	7.18747	0.0107676	0.2791	up
NM_000808.3	chrX	151335634	151619831	284198	-	57976	NM_000808.3	GABRA3	2556	-0.980104	4.28888	7.18711	0.0107694	0.2791	down
NR_120534.1	chr11	1917989	1929589	11601	+	30748	NR_120534.1	LINC01150	101927624	1.24588	-0.17107	7.18693	0.0107703	0.2791	up
NM_001139459.1	chr1	246729639	246811544	81906	+	2941	NM_001139459.1	CNST	163882	-1.47873	-1.38854	7.48813	0.0107711	0.2791	down
NR_125804.1	chr6	1605766	1607593	1828	+	17861	NR_125804.1	FOXCUT	101927703	1.25159	0.965881	7.18587	0.0107756	0.2791	up
NR_110651.1	chrX	84465712	84474295	8584	+	56440	NR_110651.1	LOC101928128	101928128	-1.5477	-1.12452	7.1847	0.0107816	0.2791	down
NR_038256.1	chr12	127221553	127230802	9250	+	35480	NR_038256.1	LINC00943	100507206	-1.27159	1.00193	7.18003	0.0108051	0.2791	down
NR_126400.1	chr11	2012326	2014699	2374	+	30756	NR_126400.1	LINC01219	104355220	-1.54779	-1.37011	7.37555	0.0108129	0.2791	down
NM_032023.3	chr10	45455219	45490172	34954	+	28292	NM_032023.3	RASSF4	83937	0.545922	7.44682	7.17651	0.0108229	0.2791	up
NR_131238.1	chrX	119170201	119280761	110561	+	56700	NR_131238.1	RHOXF1-AS1	101928969	1.56118	-0.240846	7.15075	0.0109542	0.281833	up
NR_126337.1	chr2	99377526	99388361	10836	-	8633	NR_126337.1	LOC101927070	NA	0.883957	0.438321	7.14874	0.0109645	0.281833	up
NM_001167820.1	chr20	36145819	36156333	10515	-	53469	NM_001167820.1	BLCAP	10904	-1.45704	-0.947197	7.14342	0.0109919	0.281833	down
NM_001005619.1	chr17	73720776	73753899	33124	+	45744	NM_001005619.1	ITGB4	3691	1.1922	0.554927	7.14294	0.0109943	0.281833	up
NM_032824.2	chr2	112812800	112876895	64096	+	6656	NM_032824.2	TMEM87B	84910	1.56833	-1.2157	7.14114	0.0110036	0.281833	up
NM_000290.3	chr7	44102326	44105186	2861	-	22605	NM_000290.3	PGAM2	5224	0.535262	4.85117	7.12564	0.0110838	0.283288	up
NM_006694.3	chr1	153946745	153950451	3707	-	4701	NM_006694.3	JTB	10899	0.314902	8.43229	7.12435	0.0110905	0.283288	up
NM_016944.1	chr7	141478289	141479188	900	+	22091	NM_016944.1	TAS2R4	50832	-0.93861	0.903147	7.1206	0.01111	0.283403	down
NM_001320929.1	chr15	59930261	59949453	19193	-	41430	NM_001320929.1	GTF2A2	2958	1.58458	-1.27505	7.11115	0.0111593	0.284276	up
NM_002568.3	chr8	101715144	101734315	19172	-	25209	NM_002568.3	PABPC1	26986	0.396068	8.58306	7.10044	0.0112155	0.284959	up
NM_001010906.1	chr8	27879481	27941388	61908	-	24753	NM_001010906.1	NUGGC	389643	1.65681	-1.35377	7.29341	0.0112164	0.284959	up
NM_001130415.1	chr12	12878851	12944400	65550	+	34350	NM_001130415.1	APOLD1	81575	1.32061	0.381129	7.0909	0.0112658	0.28537	up
NR_134505.1	chr10	85926984	85931832	4849	-	30072	NR_134505.1	HOST2	NA	1.9382	-0.238	7.08797	0.0112813	0.28537	up
NM_001010887.2	chr9	19408925	19452500	43576	+	25691	NM_001010887.2	ACER2	340485	0.818628	3.60368	7.08578	0.0112929	0.28537	up
NM_024756.2	chr10	88695297	88717425	22129	-	30083	NM_024756.2	MMRN2	79812	0.743042	6.94281	7.08575	0.0112931	0.28537	up
NR_145449.1	chrX	30852740	30857190	4451	+	56044	NR_145449.1	TAB3-AS1	727682	1.37778	-0.850685	7.07923	0.0113277	0.285861	up
NM_001145777.1	chr6	35548334	35656719	108386	-	19893	NM_001145777.1	FKBP5	2289	1.37124	0.426891	7.07552	0.0113474	0.285976	up
NM_001304943.1	chr17	42472645	42514219	41575	-	46916	NM_001304943.1	GPATCH8	23131	-1.98659	-1.22171	7.26026	0.0113838	0.286511	down
NM_001301828.1	chr10	135168658	135171529	2872	-	30650	NM_001301828.1	FUOM	282969	1.45922	-1.08735	7.0583	0.0114395	0.28744	up
NR_036444.1	chr16	86521269	86542466	21198	-	44316	NR_036444.1	FENDRR	400550	0.976915	2.79842	7.05612	0.0114513	0.28744	up
NM_017766.4	chr1	10707263	10856733	149471	-	3191	NM_017766.4	CASZ1	54897	1.25115	-0.547753	7.04653	0.011503	0.288355	up
NM_001080391.1	chr2	231280871	231410317	129447	+	7561	NM_001080391.1	SP100	6672	0.932806	3.78934	7.03419	0.0115699	0.289647	up
NM_001195442.1	chr3	46653925	46668033	14109	+	10209	NM_001195442.1	LOC100132146	NA	-1.64446	-1.04996	7.02838	0.0116015	0.290054	down
NM_002546.3	chr8	119935796	119964383	28588	-	25299	NM_002546.3	TNFRSF11B	4982	1.31953	2.80543	7.01792	0.0116587	0.290949	up
NM_000710.3	chr14	96722547	96731100	8554	+	38861	NM_000710.3	BDKRB1	623	1.30979	-0.715392	7.0162	0.0116682	0.290949	up
NM_000397.3	chrX	37639270	37672714	33445	+	56058	NM_000397.3	CYBB	1536	1.1874	5.95858	7.00063	0.0117539	0.292273	up
NR_121602.1	chr9	23500689	23672397	171709	-	26814	NR_121602.1	LOC101929563	101929563	1.2503	-0.75127	6.99996	0.0117577	0.292273	up
NM_001166286.1	chr15	93586636	93616389	29754	-	41952	NM_001166286.1	RGMA	56963	1.73295	-1.1312	6.99712	0.0117734	0.292273	up
NM_032439.3	chr10	60936348	61007534	71187	+	28397	NM_032439.3	PHYHIPL	84457	-0.483797	5.02932	6.99475	0.0117865	0.292273	down
NM_170672.2	chr2	33661416	33789798	128383	+	6050	NM_170672.2	RASGRP3	25780	1.29787	-0.310099	6.99118	0.0118064	0.292273	up
NM_013332.3	chr7	128095884	128098472	2589	+	21939	NM_013332.3	HILPDA	29923	1.35705	-0.145207	6.9893	0.0118168	0.292273	up
NM_001287511.1	chr1	42922165	42939052	16888	+	771	NM_001287511.1	PPCS	79717	1.30277	-0.601401	6.98696	0.0118298	0.292273	up
NM_000395.2	chr22	37309675	37336481	26807	+	54983	NM_000395.2	CSF2RB	1439	0.988604	2.94526	6.98326	0.0118505	0.292399	up
NM_002241.4	chr1	160007257	160040051	32795	-	4959	NM_002241.4	KCNJ10	3766	-0.395476	10.1727	6.97487	0.0118974	0.293039	down
NM_012137.3	chr1	85784168	85930889	146722	-	4128	NM_012137.3	DDAH1	23576	-0.456466	4.84606	6.97307	0.0119075	0.293039	down
NM_000206.2	chrX	70327254	70331481	4228	-	57465	NM_000206.2	IL2RG	3561	1.00203	2.49278	6.96488	0.0119535	0.293789	up
NM_173199.2	chr9	102584137	102596341	12205	+	26122	NM_173199.2	NR4A3	8013	-1.75914	-1.1542	6.9573	0.0119963	0.294457	down
NR_040031.1	chr18	13419498	13427533	8036	-	48136	NR_040031.1	LDLRAD4-AS1	100288122	0.908665	2.34871	6.95381	0.012016	0.294557	up
NM_001033578.2	chr8	67624653	67774257	149605	+	24097	NM_001033578.2	SGK3	23678	0.494839	1.82543	6.94997	0.0120378	0.294707	up
NM_001040153.3	chr13	78273016	78338377	65362	+	37342	NM_001040153.3	SLAIN1	122060	1.23392	-0.653812	6.94622	0.0120591	0.294847	up
NM_003613.3	chr15	65488337	65503840	15504	-	41497	NM_003613.3	CILP	8483	-0.90589	0.379357	6.94336	0.0120754	0.294862	down
NR_134618.1	chr6	17707274	17711258	3985	+	17978	NR_134618.1	LOC105374952	105374952	1.5786	-1.37387	7.12475	0.012097	0.295007	up
NM_054014.3	chr20	1352356	1373816	21461	-	53084	NM_054014.3	FKBP1A	2280	0.638291	1.30608	6.9335	0.0121317	0.295471	up
NM_001253800.1	chr19	54042042	54083523	41482	+	50085	NM_001253800.1	ZNF331	55422	-1.51227	-1.32556	6.99099	0.0122434	0.297594	down
NM_003038.4	chr2	65216495	65250999	34505	+	6235	NM_003038.4	SLC1A4	6509	-0.596589	6.15896	6.91286	0.0122504	0.297594	down
NR_002443.1	chr15	66793590	66793656	67	-	41533	NR_002443.1	SNORD18C	595100	-1.73327	-1.2314	6.90915	0.0122719	0.297733	down
NM_001297559.1	chr4	8271492	8298262	26771	+	13189	NM_001297559.1	HTRA3	94031	1.14252	-0.456888	6.90395	0.0123021	0.298081	up
NR_015407.1	chr1	238643684	238649317	5634	-	5671	NR_015407.1	LINC01139	339535	-0.928162	0.892206	6.89887	0.0123316	0.298413	down
NM_032818.2	chr9	35659341	35665278	5938	-	26945	NM_032818.2	ARHGEF39	84904	0.879849	-0.233714	6.89259	0.0123683	0.298916	up
NM_001011553.3	chr7	35840596	35946715	106120	+	21209	NM_001011553.3	2007-09-01	NA	-1.66246	-1.11853	6.88864	0.0123913	0.29909	down
NM_152468.4	chr17	76126859	76139049	12191	+	45818	NM_152468.4	TMC8	147138	0.665829	3.50142	6.87932	0.0124461	0.299565	up
NM_001172431.1	chr11	10471868	10529126	57259	+	30923	NM_001172431.1	AMPD3	272	-1.10274	-0.591277	6.87748	0.0124569	0.299565	down
NM_016943.2	chr7	141463897	141464997	1101	+	22090	NM_016943.2	TAS2R3	50831	-1.13487	-0.0852009	6.87659	0.0124621	0.299565	down
NM_006730.3	chrX	153629577	153637614	8038	-	58037	NM_006730.3	DNASE1L1	1774	1.21358	-0.440727	6.87447	0.0124746	0.299565	up
NM_004556.2	chr6	44225903	44233525	7623	-	20065	NM_004556.2	NFKBIE	4794	0.376196	4.62582	6.86706	0.0125184	0.300234	up
NM_004994.2	chr20	44637547	44645200	7654	+	52785	NM_004994.2	MMP9	4318	0.752749	2.50015	6.86024	0.0125589	0.300456	up
NR_133677.1	chr21	44560633	44561202	570	-	54502	NR_133677.1	FRGCA	106481742	1.75489	-1.16064	6.86013	0.0125595	0.300456	up
NM_001007527.1	chr5	36103414	36152015	48602	-	16764	NM_001007527.1	LMBRD2	92255	-0.502473	5.72378	6.8566	0.0125805	0.300577	down
NM_032857.4	chr15	63413999	63434264	20266	+	40523	NM_032857.4	LACTB	114294	0.402764	3.84931	6.85316	0.012601	0.300685	up
NM_207015.2	chr3	174577111	175523428	946318	+	11178	NM_207015.2	NAALADL2	254827	-0.487327	3.01586	6.8472	0.0126365	0.301152	down
NM_002312.3	chr13	108859790	108867130	7341	-	38065	NM_002312.3	LIG4	3981	-0.894639	-0.0692451	6.83803	0.0126915	0.30192	down
NR_103731.1	chr2	173420101	173490351	70251	+	7055	NR_103731.1	PDK1	5163	1.31754	-0.816059	6.83648	0.0127008	0.30192	up
NM_001159293.1	chr19	20720798	20748626	27829	-	51044	NM_001159293.1	ZNF737	100129842	-0.423729	5.32553	6.83253	0.0127246	0.302105	down
NM_004807.2	chr2	129023054	129076171	53118	-	8870	NM_004807.2	HS6ST1	9394	0.360106	6.52425	6.82215	0.0127873	0.302867	up
NM_012102.3	chr1	8412464	8877699	465236	-	3158	NM_012102.3	RERE	473	1.49153	-1.23938	6.82189	0.0127888	0.302867	up
NM_001008224.1	chr15	70946893	70994620	47728	-	41574	NM_001008224.1	UACA	55075	-1.51798	-0.968054	6.81392	0.0128372	0.303632	down
NM_001199080.2	chr1	53527724	53551174	23451	+	993	NM_001199080.2	PODN	127435	1.62096	-1.10579	6.80839	0.0128709	0.304046	up
NM_021137.4	chr17	26662548	26674035	11488	+	44845	NM_021137.4	TNFAIP1	7126	0.257857	7.41036	6.80292	0.0129043	0.304128	up
NR_133637.1	chr11	77532160	77611831	79672	+	31937	NR_133637.1	AAMDC	28971	0.953892	-0.348802	6.80254	0.0129066	0.304128	up
NR_024042.1	chr11	76391210	76432833	41624	-	33495	NR_024042.1	GUCY2EP	390226	-1.5048	-1.4182	7.32755	0.0129623	0.305059	down
NR_134853.1	chr3	58592807	58620167	27361	+	10439	NR_134853.1	FAM3D-AS1	105377108	-1.31798	-0.924953	6.77003	0.0131071	0.307848	down
NM_198456.2	chrX	54200222	54209714	9493	-	57371	NM_198456.2	FAM120C	54954	-0.698631	0.147477	6.76534	0.0131363	0.307848	down
NM_001128208.1	chr8	29952922	29995222	42301	+	23861	NM_001128208.1	LEPROTL1	23484	0.862102	0.901533	6.76392	0.0131452	0.307848	up
NM_003817.3	chr8	24298509	24367078	68570	+	23795	NM_003817.3	ADAM7	8756	1.54219	-1.41286	6.9811	0.0131602	0.307848	up
NM_031286.3	chr1	26606213	26608013	1801	+	485	NM_031286.3	SH3BGRL3	83442	0.289715	8.78277	6.76115	0.0131625	0.307848	up
NR_003232.1	chr14	101402828	101402901	74	+	38930	NR_003232.1	SNORD113-4	767564	1.28891	-0.667033	6.74992	0.0132328	0.30911	up
NM_031419.3	chr3	101568358	101579869	11512	+	10630	NM_031419.3	NFKBIZ	64332	1.33437	-0.77553	6.74713	0.0132504	0.309138	up
NM_001143819.2	chr12	113659243	113736390	77148	+	35325	NM_001143819.2	TPCN1	53373	-1.03785	-0.108803	6.74383	0.0132712	0.309239	down
NR_038342.1	chr4	79892902	80229953	337052	+	13587	NR_038342.1	LINC01088	100505875	1.33807	3.46022	6.73104	0.013352	0.310358	up
NM_000898.4	chrX	43625857	43741721	115865	-	57216	NM_000898.4	MAOB	4129	0.521853	9.29769	6.73103	0.0133521	0.310358	up
NM_001195304.1	chr10	112658488	112679124	20637	-	30416	NM_001195304.1	BBIP1	92482	0.676683	0.651476	6.71692	0.0134419	0.312061	up
NM_145057.3	chr19	54976209	54984437	8229	-	52002	NM_145057.3	CDC42EP5	148170	0.71272	3.19154	6.70439	0.0135222	0.313465	up
NR_038247.1	chr19	38039851	38078249	38399	+	49489	NR_038247.1	ZNF571-AS1	100507433	-1.6974	-1.26396	6.70231	0.0135356	0.313465	down
NM_052836.3	chr10	73156691	73407219	250529	+	28520	NM_052836.3	CDH23	64072	1.34431	-0.995315	6.69484	0.0135838	0.314194	up
NM_003404.4	chr20	43514240	43537173	22934	+	52722	NM_003404.4	YWHAB	7529	1.39233	-0.928978	6.68408	0.0136535	0.31542	up
NM_032272.4	chr8	145159305	145162515	3211	+	24467	NM_032272.4	MAF1	84232	0.306347	8.1433	6.67488	0.0137135	0.316417	up
NM_018460.3	chr2	143886899	144525921	639023	+	6887	NM_018460.3	ARHGAP15	55843	0.985	2.24034	6.66617	0.0137704	0.317343	up
NM_022091.4	chr6	101304179	101329248	25070	-	20383	NM_022091.4	ASCC3	10973	-0.512991	2.15992	6.63749	0.0139599	0.321316	down
NR_033998.1	chr1	95393584	95428826	35243	+	1306	NR_033998.1	LOC729970	729970	0.564981	4.50084	6.63479	0.0139779	0.321339	up
NM_002511.3	chr6	142395621	142409936	14316	-	20643	NM_002511.3	NMBR	4829	-1.18418	-0.00988691	6.60691	0.014165	0.325243	down
NM_001317805.1	chr8	71485453	71519926	34474	-	24987	NM_001317805.1	TRAM1	23471	1.04737	-0.445105	6.60382	0.0141859	0.325326	up
NM_003824.3	chr11	70049269	70053508	4240	+	31787	NM_003824.3	FADD	8772	0.244661	5.5874	6.59694	0.0142326	0.326	up
NM_005434.4	chr2	110841447	110874143	32697	-	8742	NM_005434.4	MALL	7851	1.28288	0.102097	6.5827	0.0143297	0.327646	up
NM_001289172.1	chr19	44716681	44741421	24741	+	49696	NM_001289172.1	ZNF227	7770	1.50563	-1.39219	6.74934	0.0143392	0.327646	up
NM_130386.2	chr18	319355	500729	181375	-	48054	NM_130386.2	COLEC12	81035	-0.689668	7.21504	6.57838	0.0143593	0.327707	down
NM_020755.3	chr6	122764493	122793026	28534	-	20506	NM_020755.3	SERINC1	57515	-0.288262	11.2575	6.56249	0.0144687	0.329807	down
NM_024608.3	chr15	75639331	75647592	8262	+	40731	NM_024608.3	NEIL1	79661	0.435956	2.84812	6.55879	0.0144943	0.329991	up
NR_037662.1	chr6	119103871	119104583	713	+	18945	NR_037662.1	LOC100287632	NA	-1.10745	-0.436355	6.55397	0.0145278	0.330145	down
NM_001243281.1	chr3	105085557	105272015	186459	+	10636	NM_001243281.1	ALCAM	214	-1.0535	-0.229201	6.55177	0.0145431	0.330145	down
NM_000517.4	chr16	222846	223709	864	+	42033	NM_000517.4	HBA2	3040	1.16644	7.2664	6.55025	0.0145537	0.330145	up
NM_001146209.2	chr11	72287184	72380108	92925	-	33440	NM_001146209.2	PDE2A	5138	-1.58163	-1.33261	6.71029	0.0145972	0.330362	down
NM_030641.3	chr22	36044424	36064456	20033	+	54974	NM_030641.3	APOL6	80830	0.744078	6.59299	6.54091	0.0146188	0.330362	up
NM_001003678.2	chr11	46958240	47185932	227693	+	31261	NM_001003678.2	C11orf49	79096	-1.21831	-0.773784	6.53933	0.0146298	0.330362	down
NM_001077.3	chr4	69402902	69434245	31344	-	14507	NM_001077.3	UGT2B17	7367	1.69015	-1.28456	6.53768	0.0146414	0.330362	up
NR_038262.1	chr11	565657	568457	2801	-	32431	NR_038262.1	MIR210HG	100506211	0.651703	2.66725	6.53417	0.014666	0.330362	up
NM_001313932.1	chr1	19700669	19812135	111467	-	3298	NM_001313932.1	CAPZB	832	1.17082	-0.532142	6.53384	0.0146684	0.330362	up
NR_136528.1	chr19	57778561	57791702	13142	-	52098	NR_136528.1	LOC105372476	NA	-1.78683	-1.23429	6.69068	0.0147287	0.331325	down
NR_144394.1	chr17	29036626	29119848	83223	+	44898	NR_144394.1	SUZ12P1	440423	-0.907872	0.0294267	6.51645	0.0147909	0.331827	down
NR_028361.1	chr6	33551476	33556803	5328	+	18363	NR_028361.1	GGNBP1	449520	-1.27661	-0.687232	6.51511	0.0148004	0.331827	down
NM_005335.5	chr3	121350245	121379795	29551	-	12345	NM_005335.5	HCLS1	3059	1.4604	-0.788513	6.51463	0.0148038	0.331827	up
NM_052957.4	chrX	70797874	70833433	35560	+	56384	NM_052957.4	GCNA	93953	0.947131	2.08729	6.50557	0.0148682	0.332874	up
NM_002187.2	chr5	158741791	158757481	15691	-	17649	NM_002187.2	IL12B	3593	-1.37724	-1.08792	6.49677	0.0149311	0.332999	down
NM_024551.2	chr12	1800247	1897845	97599	+	34116	NM_024551.2	ADIPOR2	79602	0.436232	9.00384	6.49615	0.0149355	0.332999	up
NM_001136180.1	chr18	77724582	77730822	6241	+	48045	NM_001136180.1	HSBP1L1	440498	0.355628	5.05703	6.49518	0.0149424	0.332999	up
NM_001013620.3	chr12	38710557	38723528	12972	+	34503	NM_001013620.3	ALG10B	144245	-0.464392	2.85192	6.49392	0.0149514	0.332999	down
NM_002534.3	chr12	113344582	113355831	11250	+	35313	NM_002534.3	OAS1	4938	1.26771	0.700769	6.49066	0.0149748	0.332999	up
NM_002668.2	chrX	49028184	49031469	3286	+	56195	NM_002668.2	PLP2	5355	0.717888	4.27066	6.48553	0.0150117	0.332999	up
NM_001286672.1	chr4	57215126	57253674	38549	-	14460	NM_001286672.1	AASDH	132949	1.0848	-0.60226	6.48535	0.0150129	0.332999	up
NR_001447.2	chr16	56651373	56652730	1358	+	42805	NR_001447.2	MT1L	4500	0.898239	3.53815	6.48506	0.0150151	0.332999	up
NM_007006.2	chr16	56463048	56485261	22214	-	44019	NM_007006.2	NUDT21	11051	-0.305493	8.43236	6.47333	0.0150998	0.334087	down
NM_145251.3	chr14	53196883	53241707	44825	+	38432	NM_145251.3	STYX	6815	0.673706	0.804688	6.47179	0.0151109	0.334087	up
NM_001257268.1	chr14	104406763	104408645	1883	-	39938	NM_001257268.1	RD3L	647286	-1.4776	-1.23436	6.46841	0.0151354	0.334087	down
NR_046252.1	chr3	14984286	14989012	4727	-	11530	NR_046252.1	FGD5-AS1	100505641	-1.17375	-0.902134	6.46507	0.0151597	0.334087	down
NM_000129.3	chr6	6144311	6320924	176614	-	19411	NM_000129.3	F13A1	2162	1.1024	5.62306	6.46371	0.0151696	0.334087	up
NM_006018.2	chr12	123199303	123201439	2137	-	36934	NM_006018.2	HCAR3	8843	1.45491	-1.02828	6.46093	0.0151898	0.334087	up
NM_173500.3	chr15	43036536	43213007	176472	-	41241	NM_173500.3	TTBK2	146057	-0.290091	5.80451	6.45923	0.0152022	0.334087	down
NM_001242839.1	chr1	228327785	228336656	8872	+	2778	NM_001242839.1	GUK1	2987	-1.19122	-0.674845	6.45872	0.0152059	0.334087	down
NR_135229.1	chr3	101292938	101313309	20372	+	10619	NR_135229.1	PCNP	57092	0.349969	6.81778	6.45003	0.0152694	0.335092	up
NR_110646.1	chrX	79483988	79590817	106830	-	57543	NR_110646.1	CHMP1B2P	101060146	-1.40517	-1.21519	6.60804	0.015297	0.335307	down
NM_024829.5	chr12	14656597	14720791	64195	-	35825	NM_024829.5	PLBD1	79887	0.607747	3.78562	6.43784	0.015359	0.336108	up
NM_001013257.2	chr19	45312316	45324678	12363	+	49714	NM_001013257.2	BCAM	4059	0.878759	1.15007	6.43466	0.0153825	0.336108	up
NM_001321127.1	chr3	52444524	52457657	13134	+	10369	NM_001321127.1	PHF7	51533	-1.47269	-1.34602	6.5919	0.0154108	0.336108	down
NR_027654.1	chr15	66994674	67074338	79665	+	40579	NR_027654.1	SMAD6	4091	1.44754	-1.41775	6.5904	0.0154214	0.336108	up
NR_126348.1	chr8	123682624	123706345	23722	-	25312	NR_126348.1	LINC01151	104266958	-1.6408	-1.24265	6.58732	0.0154433	0.336108	down
NM_022173.2	chr2	70436576	70475779	39204	-	8360	NM_022173.2	TIA1	7072	-1.54145	-1.08204	6.42634	0.0154442	0.336108	down
NM_014715.3	chr11	128834955	128894088	59134	-	34042	NM_014715.3	ARHGAP32	9743	-1.14903	0.15822	6.42442	0.0154584	0.336108	down
NM_001282459.1	chr6	31895254	31902835	7582	+	18295	NM_001282459.1	C2	717	1.08519	-0.573553	6.40963	0.0155687	0.338116	up
NM_153634.2	chr12	39046002	39299420	253419	-	35956	NM_153634.2	CPNE8	144402	0.501887	5.70754	6.40521	0.0156017	0.338445	up
NM_006634.2	chr2	85811531	85820511	8981	+	6415	NM_006634.2	VAMP5	10791	0.570863	6.62801	6.39837	0.0156531	0.339051	up
NM_001286779.1	chr9	130025941	130155828	129888	+	26362	NM_001286779.1	GARNL3	84253	-1.54382	-1.40018	7.26263	0.0156796	0.339051	down
NR_033841.1	chr2	241894034	241906868	12835	-	9701	NR_033841.1	LOC200772	200772	1.4442	-0.432491	6.39321	0.0156921	0.339051	up
NM_006495.3	chr17	29630788	29641130	10343	-	46547	NM_006495.3	EVI2B	2124	0.776824	4.46444	6.39194	0.0157016	0.339051	up
NM_025225.2	chr22	44319619	44343448	23830	+	55127	NM_025225.2	PNPLA3	80339	-0.747652	0.889981	6.38727	0.0157369	0.339425	down
NM_003246.3	chr15	39873280	39891119	17840	+	40183	NM_003246.3	THBS1	7057	0.856542	5.82203	6.38228	0.0157748	0.339627	up
NM_019101.2	chr6	31623671	31625987	2317	+	18262	NM_019101.2	APOM	55937	-1.4102	-1.35841	6.54008	0.0157823	0.339627	down
NM_019107.3	chr19	4657557	4670415	12859	-	50571	NM_019107.3	MYDGF	56005	0.227636	6.68042	6.37155	0.0158564	0.340786	up
NM_001276501.1	chr6	32158543	32160692	2150	-	19783	NM_001276501.1	GPSM3	63940	1.00496	0.619504	6.36457	0.0159098	0.340786	up
NM_173852.3	chr1	155141884	155145804	3921	-	4757	NM_173852.3	KRTCAP2	200185	0.247136	6.2283	6.36342	0.0159186	0.340786	up
NM_003551.2	chr5	137450861	137475132	24272	-	17376	NM_003551.2	NME5	8382	-0.563871	5.26768	6.36194	0.01593	0.340786	down
NM_005480.3	chr12	49716971	49725514	8544	+	34586	NM_005480.3	TROAP	10024	1.61443	-0.676215	6.36157	0.0159328	0.340786	up
NM_017923.3	chr4	164445450	164534776	89327	-	15062	NM_017923.3	2001-03-01	55016	1.49576	-1.42989	6.67345	0.0159447	0.340786	up
NM_004148.3	chr9	95883771	95896570	12800	-	27216	NM_004148.3	NINJ1	4814	0.370831	7.19633	6.35735	0.0159652	0.340838	up
NM_001330354.1	chr2	99225011	99234978	9968	+	6520	NM_001330354.1	UNC50	25972	1.1588	-0.92244	6.35223	0.0160047	0.341294	up
NR_003320.1	chr15	25307479	25307575	97	+	40025	NR_003320.1	SNORD116-5	100033417	-1.42985	-1.34713	6.5001	0.0160757	0.34213	down
NM_001320151.1	chr12	113344582	113369995	25414	+	35316	NM_001320151.1	OAS1	4938	1.53943	-0.993468	6.34067	0.0160941	0.34213	up
NR_120482.1	chr12	362608	366465	3858	-	35560	NR_120482.1	LOC102723544	102723544	-1.72905	-1.25801	6.49647	0.0161026	0.34213	down
NM_001318093.1	chr5	115177303	115249778	72476	+	15860	NM_001318093.1	AP3S1	1176	-1.2947	-0.99999	6.33778	0.0161165	0.34213	down
NM_001291163.1	chr1	225997836	226033264	35429	+	2748	NM_001291163.1	EPHX1	2052	0.787583	3.42561	6.33368	0.0161483	0.342268	up
NM_005849.3	chr16	21652605	21663987	11383	-	43770	NM_005849.3	IGSF6	10261	0.977653	2.74299	6.33227	0.0161593	0.342268	up
NM_201566.2	chr17	6939394	6943440	4047	+	44543	NM_201566.2	SLC16A13	201232	0.63424	1.91776	6.32178	0.0162413	0.343066	up
NM_006763.2	chr1	203274664	203278730	4067	+	2466	NM_006763.2	BTG2	7832	-0.710718	7.68458	6.31835	0.0162681	0.343066	down
NR_015364.2	chr7	26526288	26535987	9700	+	21098	NR_015364.2	LOC441204	441204	-0.75801	2.95326	6.31722	0.016277	0.343066	down
NM_000969.3	chr1	93297594	93307481	9888	+	1282	NM_000969.3	RPL5	6125	0.289666	8.32418	6.31558	0.0162899	0.343066	up
NM_001145511.1	chr1	61542946	61928460	385515	+	1052	NM_001145511.1	NFIA	4774	-1.06256	0.134626	6.31441	0.0162991	0.343066	down
NR_130721.1	chr11	2861365	2882799	21435	-	32507	NR_130721.1	KCNQ1-AS1	338653	1.43923	-1.24597	6.31336	0.0163074	0.343066	up
NM_003841.4	chr8	22960327	22974950	14624	+	23775	NM_003841.4	TNFRSF10C	8794	0.848283	1.09724	6.31041	0.0163306	0.343066	up
NM_001985.2	chr19	51848409	51869672	21264	-	51821	NM_001985.2	ETFB	2109	0.838486	0.291	6.30889	0.0163425	0.343066	up
NM_005204.3	chr10	30722950	30750762	27813	+	28129	NM_005204.3	MAP3K8	1326	1.2508	-0.333647	6.30273	0.0163912	0.343582	up
NM_001008563.4	chr9	132597696	132644117	46422	+	26489	NM_001008563.4	USP20	10868	-1.44621	-1.09262	6.29969	0.0164152	0.343582	down
NR_021493.1	chr15	93111048	93115493	4446	-	41950	NR_021493.1	LINC00930	100144604	1.36404	-0.965286	6.29887	0.0164218	0.343582	up
NM_001085400.1	chr4	37612256	37687999	75744	-	14348	NM_001085400.1	RELL1	768211	0.797793	6.52466	6.29154	0.01648	0.34404	up
NR_002734.2	chr8	67679564	67680269	706	-	24966	NR_002734.2	PTTG3P	26255	1.17025	0.0519178	6.29151	0.0164802	0.34404	up
NM_001099221.1	chr5	134784558	134788089	3532	-	17354	NM_001099221.1	TIFAB	497189	1.69991	-1.18465	6.43548	0.0165624	0.345374	up
NM_022047.3	chr6	35265595	35289548	23954	+	18392	NM_022047.3	DEF6	50619	0.766143	3.25778	6.27454	0.0166159	0.346106	up
NR_125398.1	chr3	128208046	128222050	14005	+	10847	NR_125398.1	GATA2-AS1	101927167	0.863579	3.26281	6.27198	0.0166364	0.34615	up
NM_001704.2	chr6	69345632	70099403	753772	+	18690	NM_001704.2	ADGRB3	577	-0.383956	7.57552	6.26639	0.0166814	0.346175	down
NM_001286723.1	chr9	96213978	96294871	80894	+	26061	NM_001286723.1	FAM120A	23196	-1.13674	-0.660397	6.2639	0.0167015	0.346175	down
NM_001287421.1	chr6	28235137	28246001	10865	+	18110	NM_001287421.1	ZSCAN26	7741	-1.31494	-0.917519	6.26327	0.0167065	0.346175	down
NM_080671.3	chr2	223916648	223920355	3708	+	7521	NM_080671.3	KCNE4	23704	0.627992	5.06779	6.26272	0.016711	0.346175	up
NM_004759.4	chr1	206858365	206907630	49266	+	2535	NM_004759.4	MAPKAPK2	9261	1.02945	-0.197475	6.25737	0.0167543	0.346683	up
NR_110154.1	chr2	8811114	8821993	10880	-	7819	NR_110154.1	ID2-AS1	100506299	-0.637891	2.21574	6.25428	0.0167793	0.346683	down
NR_026965.1	chr13	103532449	103548383	15935	+	37429	NR_026965.1	METTL21EP	121952	-0.85689	0.627898	6.25288	0.0167907	0.346683	down
NR_109873.1	chr5	151056506	151067471	10966	+	16331	NR_109873.1	CTB-113P19.1	NA	1.36315	-0.575942	6.24975	0.0168161	0.346827	up
NM_004186.4	chr3	50192844	50226508	33665	+	10283	NM_004186.4	SEMA3F	6405	1.22708	-0.191241	6.24344	0.0168675	0.347209	up
NR_003942.1	chr1	173835773	173835853	81	-	5161	NR_003942.1	SNORD76	692196	-1.42333	-1.38875	6.3939	0.016884	0.347209	down
NM_024832.4	chr14	92980125	93155339	175215	+	38803	NM_024832.4	RIN3	79890	0.786922	0.529962	6.2407	0.0168899	0.347209	up
NM_025106.3	chr1	9352941	9429591	76651	+	155	NM_025106.3	SPSB1	80176	0.356673	6.13101	6.23811	0.0169111	0.347266	up
NR_003322.1	chr15	25312934	25313030	97	+	40027	NR_003322.1	SNORD116-7	100033419	1.41684	-1.40274	6.42295	0.0169458	0.3476	up
NR_135475.1	chr10	51371379	51747981	376603	+	28363	NR_135475.1	TIMM23B	100652748	-1.64512	-1.32502	6.37666	0.0170195	0.348637	down
NR_106996.1	chr16	24214437	24214552	116	+	42500	NR_106996.1	MIR1273H	102466247	-1.49113	-1.38906	6.3749	0.0170333	0.348637	down
NR_102756.1	chr15	32828960	32872810	43851	+	40140	NR_102756.1	LOC100996255	NA	-1.16112	-0.677519	6.22059	0.017055	0.348703	down
NM_003327.3	chr1	1146706	1149548	2843	-	3015	NM_003327.3	TNFRSF4	7293	0.961495	0.455966	6.2174	0.0170814	0.348863	up
NM_001754.4	chr21	36160098	36421595	261498	-	54383	NM_001754.4	RUNX1	861	1.62744	-1.27508	6.19723	0.017249	0.351556	up
NM_152542.4	chr4	89178761	89205983	27223	-	14695	NM_152542.4	PPM1K	152926	0.321361	8.85048	6.19547	0.0172638	0.351556	up
NM_003141.3	chr11	4406127	4414926	8800	-	32553	NM_003141.3	TRIM21	6737	0.685379	4.39785	6.19483	0.0172692	0.351556	up
NM_001570.3	chr3	10206563	10285427	78865	+	9845	NM_001570.3	IRAK2	3656	0.503533	3.59259	6.18904	0.0173177	0.351798	up
NM_004708.3	chr19	33072094	33078358	6265	+	49222	NM_004708.3	PDCD5	9141	0.307752	5.31322	6.18895	0.0173184	0.351798	up
NR_038955.1	chr9	132250939	132275965	25027	+	26471	NR_038955.1	LINC00963	100506190	0.426869	4.72962	6.17753	0.0174146	0.352427	up
NR_046174.2	chr18	39766633	40271391	504759	+	47857	NR_046174.2	LINC00907	284260	-1.72196	-1.15019	6.17727	0.0174168	0.352427	down
NM_000394.3	chr21	44589118	44592920	3803	+	54110	NM_000394.3	CRYAA	1409	0.91638	0.0967415	6.17672	0.0174214	0.352427	up
NM_024490.3	chr15	25923859	26108349	184491	-	41090	NM_024490.3	ATP10A	57194	0.598752	6.63946	6.1764	0.0174241	0.352427	up
NM_001193375.1	chr19	5891287	5904024	12738	-	50600	NM_001193375.1	NDUFA11	126328	0.826638	-0.0175571	6.17199	0.0174614	0.352803	up
NM_001267606.1	chr10	38117693	38146564	28872	-	29566	NM_001267606.1	ZNF248	57209	-1.35245	-0.980766	6.16628	0.0175098	0.353403	down
NM_001029874.1	chr12	27849428	27850566	1139	+	34459	NM_001029874.1	REP15	387849	0.963371	1.56159	6.16122	0.0175528	0.353891	up
NM_019105.6	chr6	32008932	32077151	68220	-	19760	NM_019105.6	TNXB	7148	0.64215	5.39103	6.15147	0.0176361	0.354991	up
NM_001080470.1	chr1	120162000	120190390	28391	-	4454	NM_001080470.1	ZNF697	90874	-0.45219	3.67689	6.15042	0.0176451	0.354991	down
NM_199424.2	chr16	69958886	69975644	16759	+	43056	NM_199424.2	WWP2	11060	-1.29215	-0.595232	6.14754	0.0176697	0.355109	down
NR_045628.1	chr2	167260083	167343481	83399	-	9086	NR_045628.1	SCN7A	6332	-1.71821	-1.0321	6.1429	0.0177096	0.355532	down
NM_005546.3	chr5	156607907	156682109	74203	+	16371	NM_005546.3	ITK	3702	-0.925642	0.665363	6.13228	0.0178012	0.356462	down
NR_111948.1	chr8	1244294	1250827	6534	-	24512	NR_111948.1	LOC286083	286083	-1.18845	-0.710166	6.13128	0.0178099	0.356462	down
NR_109791.1	chr9	92731698	92749768	18071	+	26027	NR_109791.1	LOC101927847	101927847	1.505	-1.31456	6.27855	0.0178127	0.356462	up
NR_001571.2	chr7	148638580	148638663	84	+	22157	NR_001571.2	RNY5	6090	1.71223	-1.30167	6.12844	0.0178345	0.356519	up
NR_027378.1	chr8	63890420	63897460	7041	+	24066	NR_027378.1	UG0898H09	NA	-0.563736	8.87622	6.12395	0.0178734	0.356919	down
NM_024786.2	chr5	795720	851101	55382	-	16625	NM_024786.2	ZDHHC11	79844	0.861965	2.68822	6.11814	0.0179238	0.357464	up
NM_015907.2	chr4	17578927	17609590	30664	+	13244	NM_015907.2	LAP3	51056	0.409553	7.35955	6.11645	0.0179386	0.357464	up
NR_047469.1	chr3	87138430	87147852	9423	+	10519	NR_047469.1	LINC00506	100846978	-0.84087	0.115832	6.10448	0.0180433	0.358825	down
NM_022146.4	chr10	72014713	72043450	28738	-	29915	NM_022146.4	NPFFR1	64106	-0.909133	0.906201	6.10429	0.018045	0.358825	down
NM_001098612.1	chr19	52145806	52150132	4327	-	51846	NM_001098612.1	SIGLEC14	100049587	1.28615	2.69825	6.10183	0.0180665	0.358875	up
NM_133373.4	chr17	43189008	43209900	20893	-	46943	NM_133373.4	PLCD3	113026	0.569244	8.39953	6.09584	0.0181193	0.359347	up
NM_001163424.1	chr2	241070242	241075747	5506	-	9682	NM_001163424.1	COPS9	150678	0.399997	6.54449	6.0948	0.0181284	0.359347	up
NM_002526.3	chr6	86159302	86205509	46208	+	18780	NM_002526.3	NT5E	4907	-0.921546	-0.109788	6.08995	0.0181713	0.359522	down
NR_046567.1	chr11	70477199	70481595	4397	+	31795	NR_046567.1	SHANK2-AS1	100874198	-1.2657	-0.938389	6.08948	0.0181754	0.359522	down
NM_001206559.1	chr13	28194880	28241559	46680	+	37092	NM_001206559.1	POLR1D	51082	0.470453	1.99656	6.0857	0.0182088	0.359676	up
NM_207408.1	chr5	125967414	125971974	4561	+	15927	NM_207408.1	TEX43	389320	1.48424	-1.20054	6.08429	0.0182214	0.359676	up
NM_001130698.1	chr4	122800183	122872909	72727	-	14912	NM_001130698.1	TRPC3	7222	-1.14435	0.546842	6.07983	0.0182609	0.359754	down
NR_120550.1	chr11	33796245	33797216	972	+	31094	NR_120550.1	FBXO3-AS1	NA	-1.53965	-1.40105	6.62428	0.0182635	0.359754	down
NM_001193521.1	chr12	113536624	113573559	36936	-	36801	NM_001193521.1	RASAL1	8437	-1.37405	-1.40296	6.21864	0.0183168	0.360174	down
NM_001102608.1	chr3	130279178	130395888	116711	+	10876	NM_001102608.1	COL6A6	131873	-0.942346	1.49598	6.07087	0.0183407	0.360174	down
NR_033875.1	chr2	20068615	20084808	16194	+	5866	NR_033875.1	LINC00954	400946	-1.48379	-1.03656	6.07072	0.0183421	0.360174	down
NM_001099733.1	chr18	904944	912173	7230	+	47617	NM_001099733.1	ADCYAP1	116	-1.52472	-0.835929	6.06823	0.0183643	0.360235	down
NR_038406.1	chr8	74332309	74353753	21445	+	24129	NR_038406.1	STAU2-AS1	100128126	0.867672	-0.157429	6.05106	0.0185186	0.362883	up
NM_005345.5	chr6	31783291	31785719	2429	+	18280	NM_005345.5	HSPA1A	3303	1.1597	8.94024	6.04338	0.018588	0.363204	up
NM_003899.3	chr13	111806061	111958081	152021	+	37469	NM_003899.3	ARHGEF7	8874	1.4789	-1.40106	6.69954	0.018594	0.363204	up
NR_023915.1	chr15	25361692	25367623	5932	+	40051	NR_023915.1	IPW	3653	0.411377	5.85726	6.04181	0.0186022	0.363204	up
NM_152788.4	chr12	99128569	100378432	1249864	-	36636	NM_152788.4	ANKS1B	56899	-0.657554	2.73454	6.04073	0.018612	0.363204	down
NM_145197.2	chr2	99771418	99779620	8203	+	6525	NM_145197.2	LIPT1	51601	-1.34146	-1.00156	6.03771	0.0186394	0.363362	down
NR_015445.1	chr8	144779285	144780583	1299	+	24455	NR_015445.1	BREA2	286076	0.957572	-0.135247	6.0335	0.0186777	0.363605	up
NM_001256718.1	chr6	84262604	84418520	155917	-	20260	NM_001256718.1	SNAP91	9892	-1.56581	-1.31184	6.03211	0.0186904	0.363605	down
NM_024594.3	chr5	167982628	168006614	23987	-	17676	NM_024594.3	PANK3	79646	-0.294203	5.69858	6.02651	0.0187415	0.363922	down
NM_001204453.1	chr7	102987971	103002914	14944	+	21813	NM_001204453.1	PSMC2	5701	-1.63109	-1.20304	6.02355	0.0187686	0.363922	down
NM_015621.2	chr5	150560613	150603654	43042	-	17587	NM_015621.2	CCDC69	26112	0.636656	6.39676	6.02299	0.0187737	0.363922	up
NR_132753.1	chr12	50850354	50850569	216	+	34626	NR_132753.1	SNORD133	106633800	1.4539	-1.215	6.02058	0.0187958	0.363922	up
NM_198991.3	chr18	24034874	24220308	185435	-	48179	NM_198991.3	KCTD1	284252	-1.37332	-1.40218	6.16252	0.0188032	0.363922	down
NR_027840.1	chr3	197477261	197511317	34057	+	11395	NR_027840.1	FYTTD1	84248	-0.853691	0.182046	6.01473	0.0188495	0.364373	down
NM_001320675.1	chr15	59951345	59981125	29781	-	41433	NM_001320675.1	BNIP2	663	1.24014	-1.30779	6.15298	0.0188873	0.364373	up
NM_001080480.2	chr6	20099915	20212695	112781	-	19506	NM_001080480.2	MBOAT1	154141	-1.46593	-1.332	6.15261	0.0188905	0.364373	down
NM_001172132.1	chr20	30639991	30689659	49669	+	52507	NM_001172132.1	HCK	3055	1.55555	-1.26723	6.00627	0.0189275	0.364373	up
NM_004701.3	chr15	59397284	59417244	19961	+	40493	NM_004701.3	CCNB2	9133	1.16095	0.415609	6.0049	0.0189402	0.364373	up
NM_001270468.1	chr12	93964757	93970521	5765	+	35069	NM_001270468.1	SOCS2	8835	1.26735	-1.02785	6.00098	0.0189765	0.364373	up
NR_003950.1	chr22	23732792	23744799	12008	-	55359	NR_003950.1	ZDHHC8P1	150244	0.532769	5.63712	5.99893	0.0189954	0.364373	up
NM_005560.4	chr20	60884116	60942368	58253	-	53755	NM_005560.4	LAMA5	3911	0.585042	5.812	5.99779	0.019006	0.364373	up
NM_006113.4	chr1	108113782	108507545	393764	-	4269	NM_006113.4	VAV3	10451	-0.794234	1.69793	5.99374	0.0190436	0.364373	down
NR_135036.1	chr12	92539861	92579560	39700	+	35048	NR_135036.1	LOC101928617	101928617	1.42669	-1.18573	5.99363	0.0190446	0.364373	up
NR_125936.1	chr4	31999001	32157028	158028	+	13296	NR_125936.1	LOC102723828	NA	1.80616	-1.12987	5.99334	0.0190473	0.364373	up
NM_005634.2	chrX	139585152	139587225	2074	-	57907	NM_005634.2	SOX3	6658	-0.621076	2.97078	5.99214	0.0190585	0.364373	down
NR_036519.1	chr17	80407591	80408707	1117	-	47597	NR_036519.1	C17orf62	NA	0.603206	0.899573	5.98737	0.0191029	0.364758	up
NM_001285549.1	chr2	207139752	207179151	39400	+	7346	NM_001285549.1	ZDBF2	57683	-1.27066	-1.0764	5.98583	0.0191174	0.364758	down
NR_033919.1	chr6	139790132	139795733	5602	-	20641	NR_033919.1	LINC01625	645434	-0.658632	1.55344	5.98225	0.0191508	0.364762	down
NR_001458.3	chr21	26934457	26947480	13024	+	53878	NR_001458.3	MIR155HG	114614	1.21377	-0.219682	5.98167	0.0191562	0.364762	up
NM_006990.4	chr1	27730730	27816698	85969	-	3464	NM_006990.4	WASF2	10163	0.440002	4.29127	5.97925	0.0191789	0.364824	up
NM_020949.2	chr3	170177342	170303863	126522	-	12740	NM_020949.2	SLC7A14	57709	-0.930203	7.19133	5.97438	0.0192245	0.365324	down
NM_001042724.1	chr19	45349393	45392485	43093	+	49717	NM_001042724.1	NECTIN2	5819	0.659713	4.0501	5.96849	0.01928	0.365861	up
NM_207373.2	chr10	85933554	85945050	11497	+	28669	NM_207373.2	C10orf99	387695	1.41799	-1.43593	6.95689	0.0192916	0.365861	up
NM_001330120.1	chr10	88715558	88723017	7460	+	28693	NM_001330120.1	SNCG	6623	1.57088	-1.0607	5.96112	0.0193495	0.366591	up
NM_001560.2	chrX	117861559	117928496	66938	+	56679	NM_001560.2	IL13RA1	3597	0.632443	7.44215	5.95898	0.0193698	0.366606	up
NM_138287.3	chr3	122283185	122294050	10866	+	10784	NM_138287.3	DTX3L	151636	0.690606	6.21517	5.95076	0.0194478	0.367667	up
NM_001001933.1	chr1	75594119	75627218	33100	+	1160	NM_001001933.1	LHX8	431707	-1.1966	0.598284	5.94875	0.019467	0.367667	down
NM_207360.2	chr6	149768766	149806148	37383	-	20697	NM_207360.2	ZC3H12D	340152	0.697112	1.64738	5.94692	0.0194844	0.367667	up
NM_002800.4	chr6	32821938	32827628	5691	+	18330	NM_002800.4	PSMB9	5698	0.57805	5.28418	5.93991	0.0195513	0.36851	up

## Sheet: All Genes
	seqnames	start	end	width	strand	tx_id	tx_name	symbol	ENTREZID	logFC	logCPM	F	PValue	FDR	direction
NM_174918.2	chr19	7741943	7744719	2777	+	48719	NM_174918.2	MCEMP1	199675	4.4952	0.854085	71.9143	2.52305e-10	4.7562e-06	up
NM_002965.3	chr1	153330330	153333503	3174	+	1781	NM_002965.3	S100A9	6280	2.87328	5.83559	44.9525	5.94233e-08	0.000543971	up
NM_182614.2	chr13	114462216	114514899	52684	+	37513	NM_182614.2	TMEM255B	348013	1.45288	2.60451	41.905	1.23237e-07	0.000543971	up
NM_000578.3	chr2	219246752	219261617	14866	+	7448	NM_000578.3	SLC11A1	6556	2.08115	3.69131	41.8345	1.25377e-07	0.000543971	up
NM_016354.3	chr20	61273797	61303647	29851	+	52974	NM_016354.3	SLCO4A1	28231	3.30927	7.15263	41.2617	1.44282e-07	0.000543971	up
NM_000624.5	chr14	95047706	95059457	11752	+	38844	NM_000624.5	SERPINA5	5104	3.16909	3.78064	40.2482	1.85466e-07	0.000582703	up
NM_001565.3	chr4	76942269	76944689	2421	-	14576	NM_001565.3	CXCL10	3627	6.11324	5.34645	36.0703	5.41779e-07	0.00140063	up
NM_005720.3	chr7	98972298	98992424	20127	+	21665	NM_005720.3	ARPC1B	10095	1.20493	6.602	35.5383	6.23825e-07	0.00140063	up
NM_000450.2	chr1	169691781	169703220	11440	-	5118	NM_000450.2	SELE	6401	4.44543	4.28722	35.2777	6.68702e-07	0.00140063	up
NM_000064.3	chr19	6677846	6720693	42848	-	50633	NM_000064.3	C3	718	2.30001	8.95054	34.1964	8.94558e-07	0.00152556	up
NM_003955.4	chr17	76352858	76356160	3303	-	47456	NM_003955.4	SOCS3	9021	3.37702	7.00562	33.8766	9.75809e-07	0.00152556	up
NM_015474.3	chr20	35520227	35580246	60020	-	53454	NM_015474.3	SAMHD1	25939	1.07753	6.68333	33.3577	1.12462e-06	0.00152556	up
NM_052972.2	chr19	4537227	4540036	2810	-	50569	NM_052972.2	LRG1	116844	3.24587	1.67093	33.2055	1.17268e-06	0.00152556	up
NM_001085.4	chr14	95078714	95090390	11677	+	38845	NM_001085.4	SERPINA3	12	3.33463	8.49702	33.1265	1.19846e-06	0.00152556	up
NM_025194.2	chr19	41223008	41246765	23758	+	49573	NM_025194.2	ITPKC	80271	1.03759	5.52528	32.8794	1.28305e-06	0.00152556	up
NR_131925.1	chr1	211813150	211827964	14815	+	2612	NR_131925.1	LINC01693	105748977	3.89986	-0.357847	36.1373	1.29484e-06	0.00152556	up
NM_014358.3	chr12	8685901	8693558	7658	-	35710	NM_014358.3	CLEC4E	26253	2.47446	2.37143	31.3953	1.94298e-06	0.00214936	up
NM_007286.5	chr5	150020207	150038792	18586	+	16318	NM_007286.5	SYNPO	11346	0.77777	6.32348	31.2019	2.05233e-06	0.00214936	up
NM_021175.3	chr19	35773249	35776046	2798	+	49316	NM_021175.3	HAMP	57817	2.41751	3.79445	29.238	3.6126e-06	0.00344771	up
NM_020406.3	chr19	43857811	43867324	9514	+	49649	NM_020406.3	CD177	57126	2.87229	0.755098	29.1954	3.65785e-06	0.00344771	up
NM_032827.6	chr2	85980909	86018506	37598	+	6426	NM_032827.6	ATOH8	84913	1.41373	5.91049	28.2633	4.81433e-06	0.00432166	up
NM_000576.2	chr2	113587337	113594356	7020	-	8779	NM_000576.2	IL1B	3553	3.61946	3.14043	28.0211	5.17404e-06	0.00443345	up
NM_005178.4	chr19	45251978	45263301	11324	+	49710	NM_005178.4	BCL3	602	1.90364	5.11148	27.6461	5.78776e-06	0.00474169	up
NM_001278655.1	chr20	48884023	48896332	12310	+	52833	NM_001278655.1	LINC01272	NA	3.04411	0.190583	27.4261	6.18339e-06	0.00474169	up
NM_005621.1	chr1	153346184	153348075	1892	-	4664	NM_005621.1	S100A12	6283	2.90234	2.78143	27.3701	6.28839e-06	0.00474169	up
NR_002798.1	chr19	50837057	50848005	10949	-	51739	NR_002798.1	NAPSB	256236	2.32608	3.77885	27.1572	6.70574e-06	0.00483561	up
NM_002982.3	chr17	32582296	32584222	1927	+	44950	NM_002982.3	CCL2	6347	3.11727	4.81939	27.0504	6.92597e-06	0.00483561	up
NM_006332.4	chr19	18284590	18288934	4345	+	49064	NM_006332.4	IFI30	10437	1.93888	5.00841	26.6887	7.73007e-06	0.00520427	up
NM_003890.2	chr19	40353963	40440533	86571	-	51318	NM_003890.2	FCGBP	8857	2.73483	5.58402	26.5509	8.06192e-06	0.00524053	up
NM_017506.1	chr19	14937139	14939276	2138	-	50906	NM_017506.1	OR7A5	26659	2.24701	2.37346	26.3539	8.56251e-06	0.00538039	up
NM_014505.5	chr12	70760062	70828072	68011	+	34984	NM_014505.5	KCNMB4	27345	0.622991	8.56335	26.2099	8.94935e-06	0.00544207	up
NM_001972.3	chr19	852209	856246	4038	+	48507	NM_001972.3	ELANE	1991	-3.96942	0.329962	25.9324	9.74711e-06	0.00546292	down
NM_003004.2	chr17	80278900	80291921	13022	-	47582	NM_003004.2	SECTM1	6398	1.86249	2.63433	25.905	9.82998e-06	0.00546292	up
NM_000201.2	chr19	10381517	10397291	15775	+	48807	NM_000201.2	ICAM1	3383	1.76925	5.94355	25.8974	9.85301e-06	0.00546292	up
NM_000491.4	chr1	22979474	22988130	8657	+	390	NM_000491.4	C1QB	713	2.0917	7.88999	25.107	1.25963e-05	0.00664112	up
NM_004417.3	chr5	172195093	172198203	3111	-	17696	NM_004417.3	DUSP1	1843	-1.277	8.73335	25.0851	1.26826e-05	0.00664112	down
NR_135116.1	chr1	230138464	230142909	4446	+	2802	NR_135116.1	LINC01736	101927532	1.575	3.03663	24.9467	1.32449e-05	0.00670952	up
NM_000215.3	chr19	17935591	17958841	23251	-	50968	NM_000215.3	JAK3	3718	1.02731	4.33831	24.8671	1.35798e-05	0.00670952	up
NM_003064.3	chr20	43880880	43883205	2326	-	53520	NM_003064.3	SLPI	6590	1.80177	1.1247	24.7973	1.3881e-05	0.00670952	up
NM_002934.2	chr14	21423630	21424594	965	+	38161	NM_002934.2	RNASE2	6036	2.86776	2.34505	24.4658	1.54112e-05	0.00701836	up
NM_005022.3	chr17	4848945	4852381	3437	-	46088	NM_005022.3	PFN1	5216	0.43282	8.66403	24.4477	1.54994e-05	0.00701836	up
NM_181449.2	chr17	72606022	72619897	13876	-	47314	NM_181449.2	CD300E	342510	3.6888	0.797719	24.4198	1.56369e-05	0.00701836	up
NM_002198.2	chr5	131817301	131826465	9165	-	17292	NM_002198.2	IRF1	3659	1.86088	5.78119	24.1636	1.69611e-05	0.00743565	up
NM_002467.4	chr8	128748315	128753680	5366	+	24371	NM_002467.4	MYC	4609	1.48261	3.31848	23.9295	1.82744e-05	0.00770955	up
NM_000270.3	chr14	20937538	20946165	8628	+	38147	NM_000270.3	PNP	4860	1.2928	5.89746	23.9074	1.84038e-05	0.00770955	up
NM_005860.2	chr19	676389	683392	7004	+	48495	NM_005860.2	FSTL3	10272	0.78993	4.8796	23.7654	1.92585e-05	0.00789223	up
NM_018154.2	chr19	14230321	14247440	17120	-	50884	NM_018154.2	ASF1B	55723	1.82987	1.16937	23.3771	2.18179e-05	0.00869315	up
NM_005282.2	chr19	46093022	46105466	12445	-	51517	NM_005282.2	GPR4	2828	1.98314	5.99958	23.3105	2.2291e-05	0.00869315	up
NR_033909.1	chr14	21387500	21388335	836	+	38160	NR_033909.1	ECRP	643332	3.44397	-0.160165	23.2684	2.25964e-05	0.00869315	up
NM_000602.4	chr7	100770370	100782547	12178	+	21770	NM_000602.4	SERPINE1	5054	2.19755	4.35968	22.8176	2.61532e-05	0.00986029	up
NM_005952.3	chr16	56716382	56718108	1727	+	42819	NM_005952.3	MT1X	4501	1.52994	7.54986	22.2398	3.15974e-05	0.0115807	up
NM_003124.4	chr2	73114512	73119289	4778	+	6305	NM_003124.4	SPR	6697	0.801721	5.7388	22.2066	3.19451e-05	0.0115807	up
NM_002124.3	chr6	32546546	32557613	11068	-	19794	NM_002124.3	HLA-DRB1	3123	1.70434	6.13634	21.8155	3.63514e-05	0.0129294	up
NM_003897.3	chr6	30710976	30712327	1352	-	19679	NM_003897.3	IER3	8870	1.23775	5.71018	21.6891	3.79084e-05	0.0132283	up
NM_032588.3	chr1	26377795	26394125	16331	-	3439	NM_032588.3	TRIM63	84676	2.59674	0.656646	21.6351	3.8595e-05	0.0132283	up
NM_003764.3	chr6	144471654	144513076	41423	+	19118	NM_003764.3	STX11	8676	1.71748	3.2241	21.4521	4.1022e-05	0.013711	up
NM_002318.2	chr8	23154410	23261722	107313	-	24699	NM_002318.2	LOXL2	4017	0.987788	3.64151	21.3731	4.21197e-05	0.013711	up
NR_026656.1	chr12	54519855	54526627	6773	+	34734	NR_026656.1	LOC400043	NA	1.27065	2.41266	21.3684	4.21853e-05	0.013711	up
NM_000596.2	chr7	45927959	45933267	5309	+	21280	NM_000596.2	IGFBP1	3484	2.36694	-0.118202	21.2528	4.38494e-05	0.0140103	up
NM_032648.2	chr1	32712818	32714461	1644	+	614	NM_032648.2	FAM167B	84734	2.10355	2.73857	21.0779	4.64993e-05	0.0146093	up
NM_002068.3	chr19	3136030	3163767	27738	+	48584	NM_002068.3	GNA15	2769	1.58877	3.23384	20.8061	5.09588e-05	0.0157479	up
NM_020370.2	chr12	54756229	54758270	2042	-	36240	NM_020370.2	GPR84	53831	2.61473	0.680671	20.49	5.67202e-05	0.0172457	up
NM_020179.2	chr11	93211638	93276546	64909	-	33602	NM_020179.2	SMCO4	56935	0.813584	3.48446	19.9801	6.75077e-05	0.0200262	up
NR_132114.1	chr16	2204783	2205359	577	-	43469	NR_132114.1	SNHG19	100507303	0.862053	5.32803	19.9594	6.79899e-05	0.0200262	up
NR_003662.3	chr19	23945816	24010937	65122	+	49179	NR_003662.3	RPSAP58	388524	0.725337	3.43036	19.9036	6.93052e-05	0.0200996	up
NM_033054.2	chr7	45002260	45018704	16445	-	22646	NM_033054.2	MYO1G	64005	1.71939	1.69321	19.5381	7.86141e-05	0.0222535	up
NM_080387.4	chr12	8666136	8674962	8827	+	34270	NM_080387.4	CLEC4D	338339	2.64382	-0.869186	19.5206	7.90931e-05	0.0222535	up
NR_110724.1	chr19	42041860	42043266	1407	+	49608	NR_110724.1	LINC01480	101927931	2.3363	0.653034	19.3569	8.37107e-05	0.0226382	up
NM_012335.3	chr19	8585674	8642331	56658	-	50681	NM_012335.3	MYO1F	4542	1.27169	4.51816	19.2981	8.5439e-05	0.0226382	up
NM_144590.2	chr10	90579656	90611732	32077	-	30101	NM_144590.2	ANKRD22	118932	3.03683	2.66498	19.269	8.63072e-05	0.0226382	up
NM_016639.2	chr16	3070313	3072384	2072	+	42222	NM_016639.2	TNFRSF12A	51330	1.42401	2.90857	19.2551	8.67261e-05	0.0226382	up
NM_001130861.1	chr22	19510547	19512860	2314	-	55296	NM_001130861.1	CLDN5	7122	2.01395	0.726032	19.2433	8.70833e-05	0.0226382	up
NM_013376.3	chr19	40928408	40931932	3525	-	51337	NM_013376.3	SERTAD1	29950	1.01488	5.48828	19.2241	8.7666e-05	0.0226382	up
NM_033409.3	chr20	740724	749228	8505	-	53069	NM_033409.3	SLC52A3	113278	1.43783	5.5825	19.1262	9.07089e-05	0.0228839	up
NM_003042.3	chr3	11034420	11080935	46516	+	9857	NM_003042.3	SLC6A1	6529	-0.461368	9.94636	19.0861	9.19884e-05	0.0228839	down
NM_153209.3	chr17	72322351	72351959	29609	+	45681	NM_153209.3	KIF19	124602	1.17413	6.13886	19.0773	9.22703e-05	0.0228839	up
NM_005620.1	chr1	152004982	152009511	4530	-	4641	NM_005620.1	S100A11	6282	1.22741	5.65708	19.0372	9.35723e-05	0.0228839	up
NM_173558.3	chr6	36973423	36996845	23423	+	18439	NM_173558.3	FGD2	221472	1.4572	2.96326	19.0034	9.46869e-05	0.0228839	up
NR_002174.2	chr6	25081295	25138051	56757	-	19533	NR_002174.2	CMAHP	8418	1.39939	2.66975	18.886	9.86578e-05	0.0235418	up
NM_001276.2	chr1	203148059	203155922	7864	-	5353	NM_001276.2	CHI3L1	1116	1.98281	8.93489	18.6172	0.000108432	0.0255507	up
NM_001185.3	chr7	99564350	99573735	9386	-	23026	NM_001185.3	AZGP1	563	1.36685	5.64776	18.5466	0.000111165	0.0258492	up
NM_022468.4	chr16	3096682	3110727	14046	+	42228	NM_022468.4	MMP25	64386	1.40848	1.29524	18.4731	0.000114086	0.0258492	up
NM_001123041.2	chr3	46395235	46402413	7179	+	10200	NM_001123041.2	CCR2	729230	2.66779	-0.153659	18.4483	0.000115093	0.0258492	up
NM_197975.2	chr5	180415845	180433727	17883	+	16602	NM_197975.2	BTNL3	10917	2.53832	-0.545073	18.446	0.000115184	0.0258492	up
NM_012072.3	chr20	23059993	23066977	6985	-	53270	NM_012072.3	CD93	22918	1.58541	5.78501	18.3967	0.000117211	0.0258611	up
NM_019058.3	chr10	74033677	74035794	2118	+	28536	NM_019058.3	DDIT4	54541	1.00278	8.19989	18.3782	0.000117981	0.0258611	up
NM_007021.3	chr10	45471709	45474330	2622	-	29653	NM_007021.3	C10orf10	NA	1.88744	8.14564	18.2941	0.000121552	0.0263377	up
NM_002090.2	chr4	74902306	74904490	2185	-	14547	NM_002090.2	CXCL3	2921	2.6162	0.363739	18.139	0.000128433	0.0275124	up
NM_138441.2	chr6	74134856	74162043	27188	-	20217	NM_138441.2	MB21D1	NA	1.40413	2.42186	18.0968	0.000130376	0.0276149	up
NM_003730.4	chr6	167343004	167370077	27074	-	20814	NM_003730.4	RNASET2	8635	0.787027	6.65336	17.9547	0.000137152	0.0287271	up
NM_130446.2	chr3	183205319	183273499	68181	-	12823	NM_130446.2	KLHL6	89857	1.60579	1.9381	17.8928	0.000140221	0.028994	up
NM_207361.5	chr13	39261173	39461268	200096	+	37148	NM_207361.5	FREM2	341640	-1.46784	3.99272	17.8674	0.000141502	0.028994	down
NM_000377.2	chrX	48542186	48549818	7633	+	56160	NM_000377.2	WAS	7454	1.22687	3.93516	17.7572	0.000147197	0.0297352	up
NM_014215.2	chr1	156810665	156828712	18048	-	4902	NM_014215.2	INSRR	3645	-1.59735	0.448853	17.7198	0.000149184	0.0297352	down
NM_014957.2	chr8	142138720	142205901	67182	+	24407	NM_014957.2	DENND3	22898	0.999326	5.71668	17.7067	0.000149884	0.0297352	up
NM_000660.6	chr19	41836228	41859788	23561	-	51351	NM_000660.6	TGFB1	7040	0.812415	6.82094	17.6782	0.000151428	0.0297352	up
NM_003840.4	chr8	22993101	23021543	28443	-	24697	NM_003840.4	TNFRSF10D	8793	1.9953	3.60743	17.554	0.000158339	0.0307717	up
NM_002205.4	chr12	54789045	54813050	24006	-	36247	NM_002205.4	ITGA5	3678	1.18131	5.58382	17.4948	0.000161754	0.0311144	up
NM_001113397.1	chr2	180306709	180610769	304061	-	9221	NM_001113397.1	ZNF385B	151126	-2.46514	-1.19402	17.4618	0.00016369	0.0311688	down
NM_018990.3	chrX	128913892	128929177	15286	+	56730	NM_018990.3	SASH3	54440	1.53262	3.98618	17.4177	0.000166315	0.031352	up
NM_001005376.2	chr19	44150247	44174498	24252	-	51457	NM_001005376.2	PLAUR	5329	1.74294	-0.27594	17.3756	0.000168863	0.0315171	up
NM_022904.2	chr19	15562435	15575392	12958	-	50927	NM_022904.2	RASAL3	64926	1.29392	2.20685	17.2981	0.000173661	0.0318765	up
NM_005213.3	chr3	122044011	122060816	16806	+	10781	NM_005213.3	CSTA	1475	2.47464	0.865316	17.2508	0.000176662	0.0318765	up
NM_001817.3	chr19	42125344	42133442	8099	-	51372	NM_001817.3	CEACAM4	1089	2.78998	-0.611331	17.233	0.000177805	0.0318765	up
NM_001925.2	chr8	6793342	6795860	2519	-	24533	NM_001925.2	DEFA4	1669	-4.48043	-0.318102	18.2161	0.000178793	0.0318765	down
NM_005946.2	chr16	56672578	56673999	1422	+	42809	NM_005946.2	MT1A	4489	2.06582	2.87095	17.2056	0.000179579	0.0318765	up
NM_014220.2	chr3	149086805	149095568	8764	-	12607	NM_014220.2	TM4SF1	4071	1.42103	7.6107	17.1849	0.000180934	0.0318765	up
NM_014441.2	chr19	51628137	51633567	5431	+	49996	NM_014441.2	SIGLEC9	27180	2.36925	0.646873	17.1198	0.000185255	0.0322629	up
NM_020125.2	chr1	159796479	159807282	10804	+	2017	NM_020125.2	SLAMF8	56833	3.15944	-1.06853	18.0718	0.000187447	0.0322629	up
NM_002872.4	chr22	37621301	37640339	19039	-	55607	NM_002872.4	RAC2	5880	1.43131	3.44315	17.0755	0.000188262	0.0322629	up
NM_001540.3	chr7	75931875	75933614	1740	+	21512	NM_001540.3	HSPB1	3315	1.14668	8.77203	17.0312	0.000191324	0.0324924	up
NM_002115.2	chr5	176307870	176326333	18464	-	17743	NM_002115.2	HK3	3101	1.57643	1.05257	16.9685	0.000195741	0.0329457	up
NM_145256.2	chr19	18501954	18508415	6462	-	50986	NM_145256.2	LRRC25	126364	1.47063	2.79783	16.8683	0.000203024	0.033869	up
NM_178859.3	chr15	65337708	65345734	8027	+	40546	NM_178859.3	SLC51B	123264	1.21202	3.64904	16.7524	0.000211809	0.0350247	up
NM_173833.5	chr8	27727399	27850369	122971	-	24751	NM_173833.5	SCARA5	286133	-1.49097	1.16883	16.6123	0.000222967	0.0365491	down
NM_005755.2	chr19	4229540	4237525	7986	+	48616	NM_005755.2	EBI3	10148	1.57735	2.89572	16.5123	0.000231318	0.0375911	up
NM_006762.2	chr1	31205315	31230683	25369	-	3500	NM_006762.2	LAPTM5	7805	1.35723	7.69009	16.4045	0.00024068	0.0387323	up
NM_014068.2	chr6	31082608	31107869	25262	+	18220	NM_014068.2	PSORS1C1	170679	1.21024	0.439069	16.3847	0.000242449	0.0387323	up
NR_034033.1	chr7	150130742	150145228	14487	+	22187	NR_034033.1	LINC00996	285972	-1.85113	-0.469538	16.2634	0.000253554	0.0397358	down
NM_021978.3	chr11	130029682	130080257	50576	+	32387	NM_021978.3	ST14	6768	1.35849	1.97334	16.2522	0.0002546	0.0397358	up
NM_004979.5	chrX	48818639	48828251	9613	-	57296	NM_004979.5	KCND1	3750	0.833542	4.76105	16.2474	0.000255054	0.0397358	up
NR_103715.1	chrX	68399400	68429767	30368	+	56332	NR_103715.1	LINC00269	100996279	-2.16083	0.0183482	16.1827	0.000261242	0.039965	down
NM_173648.3	chr2	179694484	179914786	220303	-	9215	NM_173648.3	CCDC141	285025	-0.897426	2.30139	16.1813	0.000261376	0.039965	down
NM_022371.3	chr1	179051112	179065131	14020	+	2259	NM_022371.3	TOR3A	64222	0.372365	6.20294	16.1657	0.000262886	0.039965	up
NM_001242376.1	chr17	42987035	42992920	5886	-	46933	NM_001242376.1	GFAP	2670	1.47752	0.517536	16.1259	0.000266794	0.0402347	up
NM_144646.3	chr4	71521258	71532348	11091	-	14525	NM_144646.3	JCHAIN	3512	2.88488	2.24169	16.041	0.000275335	0.0411931	up
NM_005161.4	chr11	57001051	57004927	3877	-	33031	NM_005161.4	APLNR	187	2.02526	6.6801	15.9086	0.000289236	0.0425875	up
NM_182854.3	chr16	50705536	50715264	9729	-	43978	NM_182854.3	SNX20	124460	1.97527	1.97586	15.8925	0.000290977	0.0425875	up
NM_003761.4	chr2	85804614	85809156	4543	+	6414	NM_003761.4	VAMP8	8673	1.16703	4.5676	15.8883	0.000291432	0.0425875	up
NM_001308054.1	chr14	24563490	24573341	9852	+	38247	NM_001308054.1	PCK2	5106	3.10816	-1.29772	18.3157	0.000296466	0.0429899	up
NM_006418.4	chr13	53602876	53626196	23321	+	37283	NM_006418.4	OLFM4	10562	-1.54813	1.7418	15.7571	0.000306063	0.0438771	down
NM_005630.2	chr3	133651540	133748920	97381	-	12511	NM_005630.2	SLCO2A1	6578	1.41099	3.21737	15.7468	0.000307239	0.0438771	up
NM_001855.4	chr9	101705995	101833074	127080	+	26117	NM_001855.4	COL15A1	1306	-0.97384	3.43111	15.6687	0.00031635	0.0448384	down
NR_046664.1	chr3	173628288	173638586	10299	-	12772	NR_046664.1	NLGN1-AS1	100874010	-2.83372	-1.3697	18.0513	0.000319962	0.0448515	down
NR_126453.1	chr15	99189092	99194450	5359	-	41972	NR_126453.1	IRAIN	104472848	2.19659	2.22256	15.6277	0.00032125	0.0448515	up
NM_024575.4	chr1	151129105	151132225	3121	+	1718	NM_024575.4	TNFAIP8L2	79626	1.43636	2.73783	15.6031	0.000324222	0.0448515	up
NM_020992.3	chr10	96997325	97050905	53581	-	30159	NM_020992.3	PDLIM1	9124	1.51043	4.90289	15.5874	0.000326136	0.0448515	up
NM_152649.3	chr16	74705753	74735046	29294	-	44226	NM_152649.3	MLKL	197259	1.83106	1.56076	15.545	0.000331377	0.0448515	up
NM_002445.3	chr8	15996826	16050300	53475	-	24627	NM_002445.3	MSR1	4481	1.95315	1.45886	15.5373	0.00033233	0.0448515	up
NM_002298.4	chr13	46700058	46756459	56402	-	37782	NM_002298.4	LCP1	3936	1.40859	5.76734	15.5312	0.000333097	0.0448515	up
NM_005733.2	chr5	137514417	137523404	8988	+	16029	NM_005733.2	KIF20A	10112	2.23483	0.321743	15.4852	0.000338906	0.0453101	up
NM_001289922.2	chr22	50014104	50051190	37087	-	55789	NM_001289922.2	C22orf34	348645	1.53207	2.50267	15.4653	0.000341446	0.0453282	up
NM_005628.2	chr19	47278140	47291842	13703	-	51568	NM_005628.2	SLC1A5	6510	1.34334	1.8571	15.4221	0.000347046	0.0457494	up
NM_004106.1	chr1	161185087	161189038	3952	+	2067	NM_004106.1	FCER1G	2207	1.5913	5.32998	15.3607	0.00035516	0.0461972	up
NR_030304.1	chr4	166307394	166307489	96	+	14030	NR_030304.1	MIR578	693163	-2.3827	-0.846577	15.3458	0.000357169	0.0461972	down
NR_049873.1	chr6	35632494	35632566	73	-	19894	NR_049873.1	MIR5690	100847048	3.0783	-1.0253	16.1467	0.000357795	0.0461972	up
NM_018557.2	chr2	140988996	142889270	1900275	-	8944	NM_018557.2	LRP1B	53353	-0.456132	6.76696	15.2567	0.000369377	0.0473683	down
NM_001700.4	chr19	827826	832018	4193	+	48505	NM_001700.4	AZU1	566	-2.41668	0.279388	15.2247	0.000373878	0.0473859	down
NM_004668.2	chr7	141695679	141806547	110869	+	22094	NM_004668.2	MGAM	8972	1.64725	0.583934	15.22	0.000374542	0.0473859	up
NM_001251991.1	chr6	24775641	24786327	10687	+	18004	NM_001251991.1	GMNN	51053	2.40815	-1.20415	15.9286	0.000385719	0.0482102	up
NR_104097.1	chr19	55043909	55057050	13142	+	50189	NR_104097.1	KIR3DX1	90011	-3.09167	-1.04176	15.1301	0.000387504	0.0482102	down
NR_027011.1	chr16	31579088	31580845	1758	-	43934	NR_027011.1	YBX3P1	440359	1.19142	4.11653	15.1218	0.00038873	0.0482102	up
NM_022131.2	chr3	139654027	140286919	632893	+	10975	NM_022131.2	CLSTN2	64084	-1.28213	4.30031	15.0823	0.000394589	0.0486169	down
NM_001080525.1	chr3	48348336	48369831	21496	-	11817	NM_001080525.1	SPINK8	646424	2.033	1.23589	15.0089	0.000405738	0.0496661	up
NM_181724.2	chr12	108983622	108991894	8273	-	36705	NM_181724.2	TMEM119	338773	1.25915	5.14715	14.9573	0.000413776	0.0500644	up
NM_006509.3	chr19	45504707	45541456	36750	+	49738	NM_006509.3	RELB	5971	0.72869	4.16915	14.9399	0.000416532	0.0500644	up
NM_002664.2	chr2	68592322	68624585	32264	+	6253	NM_002664.2	PLEK	5341	1.0501	4.6279	14.9372	0.00041696	0.0500644	up
NR_049810.1	chr1	147806603	147806678	76	-	4523	NR_049810.1	MIR5087	100847044	1.37753	0.190816	14.8824	0.000425741	0.0507952	up
NM_001067.3	chr17	38544773	38574202	29430	-	46726	NM_001067.3	TOP2A	7153	2.41678	2.08274	14.8599	0.000429418	0.0509117	up
NM_002960.1	chr1	153519809	153521734	1926	-	4676	NM_002960.1	S100A3	6274	1.77369	0.492594	14.8334	0.000433772	0.0511064	up
NM_001232.3	chr1	116242624	116311426	68803	-	4418	NM_001232.3	CASQ2	845	-0.960582	4.21005	14.8157	0.000436711	0.0511332	down
NM_006169.2	chr11	114166535	114183238	16704	+	32152	NM_006169.2	NNMT	4837	1.72106	2.48691	14.7316	0.000450973	0.0523838	up
NM_001066.2	chr1	12227060	12269277	42218	+	224	NM_001066.2	TNFRSF1B	7133	0.887815	6.37137	14.7201	0.00045295	0.0523838	up
NM_002133.2	chr22	35777060	35790207	13148	+	54971	NM_002133.2	HMOX1	3162	1.10533	5.86612	14.6931	0.00045765	0.0525817	up
NM_005623.2	chr17	32646066	32648421	2356	+	44953	NM_005623.2	CCL8	6355	2.54517	-0.0317609	14.666	0.000462422	0.0525817	up
NR_125772.1	chr13	80140862	80145581	4720	+	37353	NR_125772.1	LINC01068	103724388	2.58213	-1.31156	15.4032	0.00046303	0.0525817	up
NM_000594.3	chr6	31543344	31546113	2770	+	18244	NM_000594.3	TNF	7124	2.59508	-0.658994	14.6097	0.000472508	0.0530331	up
NM_001911.2	chr14	25042724	25045466	2743	-	39309	NM_001911.2	CTSG	1511	-2.91807	-0.43652	14.5819	0.000477577	0.0530331	down
NM_032152.4	chr19	8554940	8567538	12599	-	50678	NM_032152.4	PRAM1	84106	1.28416	2.8497	14.5787	0.000478154	0.0530331	up
NM_003844.3	chr8	23048970	23082680	33711	-	24698	NM_003844.3	TNFRSF10A	8797	1.43305	2.27335	14.5782	0.000478258	0.0530331	up
NR_003141.3	chr5	138609441	138615317	5877	+	16075	NR_003141.3	SNHG4	724102	-2.69664	-1.16129	14.5599	0.000481623	0.0530331	down
NM_005253.3	chr2	28615779	28637516	21738	+	5994	NM_005253.3	FOSL2	2355	1.11791	6.91861	14.5477	0.000483884	0.0530331	up
NM_006435.2	chr11	308107	309410	1304	+	30670	NM_006435.2	IFITM2	10581	1.20354	7.70308	14.5149	0.00049001	0.0532565	up
NM_002119.3	chr6	32971959	32977389	5431	-	19810	NM_002119.3	HLA-DOA	3111	1.21814	4.09265	14.4969	0.000493417	0.0532565	up
NM_004091.3	chr1	23832920	23857712	24793	-	3363	NM_004091.3	E2F2	1870	2.17005	-0.0354251	14.4917	0.000494398	0.0532565	up
NM_004441.4	chr3	134514099	134979309	465211	+	10933	NM_004441.4	EPHB1	2047	-0.627831	7.33039	14.4113	0.000509925	0.054617	down
NM_000623.3	chr14	96671135	96710666	39532	+	38860	NM_000623.3	BDKRB2	624	1.12189	2.34102	14.3785	0.000516405	0.0549986	up
NM_006186.3	chr2	157180944	157189287	8344	-	8996	NM_006186.3	NR4A2	4929	-1.26762	4.42031	14.3541	0.000521292	0.0552071	down
NM_003254.2	chrX	47441690	47446190	4501	+	56131	NM_003254.2	TIMP1	7076	0.992644	6.99312	14.3004	0.000532203	0.0559933	up
NM_004095.3	chr8	37888020	37917883	29864	+	23913	NM_004095.3	EIF4EBP1	1978	0.738066	4.08951	14.2885	0.000534656	0.0559933	up
NR_134873.1	chr4	154561320	154602338	41019	+	13951	NR_134873.1	LOC100419170	100419170	1.96339	0.327298	14.2739	0.000537674	0.0559983	up
NR_040599.1	chr19	48758932	48761451	2520	+	49829	NR_040599.1	CARD8-AS1	100505812	0.993361	2.10258	14.1686	0.000560017	0.057951	up
NM_000490.4	chr20	3063202	3065370	2169	-	53130	NM_000490.4	AVP	551	3.04243	0.0126553	14.137	0.000566916	0.057951	up
NM_020925.2	chr1	64936476	65158741	222266	+	1077	NM_020925.2	CACHD1	57685	-0.994095	0.608487	14.1164	0.000571466	0.057951	down
NM_024869.2	chr1	26485511	26489119	3609	+	474	NM_024869.2	FAM110D	79927	1.22406	4.22543	14.1159	0.000571572	0.057951	up
NM_000593.5	chr6	32812986	32821748	8763	-	19807	NM_000593.5	TAP1	6890	0.767464	4.01037	14.1149	0.000571794	0.057951	up
NM_012242.2	chr10	54074041	54077417	3377	+	28385	NM_012242.2	DKK1	22943	1.64652	1.62243	14.0626	0.00058351	0.0588222	up
NR_026670.2	chr12	131649556	131697476	47921	+	35500	NR_026670.2	LINC01257	116437	-2.61542	-1.15576	14.7198	0.000589345	0.0590944	down
NR_111939.1	chr1	221874762	221910242	35481	-	5519	NR_111939.1	DUSP10	11221	-2.10035	-1.28491	14.0092	0.000595738	0.0590991	down
NM_138450.5	chr13	50202435	50208008	5574	+	37243	NM_138450.5	ARL11	115761	1.53429	1.18301	13.9952	0.000598977	0.0590991	up
NR_028326.1	chr11	126987	131920	4934	-	32405	NR_028326.1	LINC01001	100133161	2.21776	-1.37612	14.6648	0.00060101	0.0590991	up
NM_001004323.1	chr7	100054238	100061894	7657	-	23061	NM_001004323.1	C7orf61	402573	0.944613	3.34461	13.9825	0.000601933	0.0590991	up
NM_006120.3	chr6	32916391	32920899	4509	-	19809	NM_006120.3	HLA-DMA	3108	1.04551	5.02281	13.9546	0.000608517	0.059436	up
NM_019043.3	chr10	26727266	26856732	129467	+	28089	NM_019043.3	APBB1IP	54518	1.25217	5.00253	13.8629	0.000630624	0.0612778	up
NM_003355.2	chr11	73685716	73693889	8174	-	33456	NM_003355.2	UCP2	7351	0.923229	5.9627	13.8266	0.000639626	0.0618338	up
NM_030915.3	chr2	30454397	30482899	28503	+	6017	NM_030915.3	LBH	81606	-0.758808	6.24256	13.8006	0.000646152	0.062146	down
NM_017817.2	chr13	111175413	111214084	38672	-	38075	NM_017817.2	RAB20	55647	1.09176	3.58279	13.7453	0.000660271	0.0624265	up
NM_000584.3	chr4	74606223	74609433	3211	+	13531	NM_000584.3	CXCL8	3576	2.29866	3.93747	13.7294	0.00066438	0.0624265	up
NM_022093.1	chr1	175036994	175117202	80209	+	2239	NM_022093.1	TNN	63923	-1.81089	0.14277	13.7175	0.00066748	0.0624265	down
NM_016232.4	chr2	102927962	102968497	40536	+	6565	NM_016232.4	IL1RL1	9173	2.96287	-0.697568	13.6952	0.000673332	0.0624265	up
NM_005615.4	chr14	21249210	21250626	1417	+	38158	NM_005615.4	RNASE6	6039	1.33418	3.51689	13.6931	0.000673878	0.0624265	up
NM_152565.1	chr8	87111139	87166454	55316	+	24179	NM_152565.1	ATP6V0D2	245972	1.87436	-0.920433	13.6756	0.000678502	0.0624265	up
NM_012396.4	chr1	201433412	201438299	4888	-	5319	NM_012396.4	PHLDA3	23612	0.569281	3.25036	13.6755	0.000678525	0.0624265	up
NM_001423.2	chr12	13349602	13369708	20107	+	34361	NM_001423.2	EMP1	2012	1.36193	6.8321	13.6743	0.000678846	0.0624265	up
NM_005856.2	chr7	45197367	45223849	26483	+	21277	NM_005856.2	RAMP3	10268	1.07862	5.59286	13.6742	0.000678873	0.0624265	up
NM_020945.1	chr10	49893518	50191001	297484	+	28347	NM_020945.1	WDFY4	57705	1.29568	3.28109	13.653	0.000684546	0.0626426	up
NR_026863.1	chr21	44881974	44898103	16130	-	54506	NR_026863.1	LINC00313	114038	2.17531	-0.971603	13.5347	0.000717056	0.0653005	up
NM_004271.3	chr6	6588934	6655216	66283	+	17902	NM_004271.3	LY86	9450	1.22395	3.95876	13.5059	0.000725228	0.0657273	up
NM_001164407.1	chr17	1606084	1613662	7579	-	45996	NM_001164407.1	TLCD2	727910	1.16777	3.62524	13.4185	0.000750587	0.0677	up
NM_014442.2	chr19	51954251	51961708	7458	-	51835	NM_014442.2	SIGLEC8	27181	1.21275	4.1655	13.391	0.000758769	0.0681122	up
NM_148961.3	chr2	241078446	241080073	1628	-	9683	NM_148961.3	OTOS	150677	1.34451	3.82516	13.3498	0.000771193	0.0686913	up
NM_001195422.1	chr19	17445791	17453540	7750	+	49029	NM_001195422.1	GTPBP3	84705	2.29742	-1.3171	13.9671	0.000772509	0.0686913	up
NM_005779.2	chr5	77781038	77944648	163611	-	17019	NM_005779.2	LHFPL2	10184	0.604847	6.69284	13.3304	0.000777116	0.0687766	up
NM_001135032.1	chr2	75719444	75788092	68649	-	8479	NM_001135032.1	EVA1A	84141	1.89102	-0.84027	13.3013	0.000786092	0.0692459	up
NM_003651.4	chr12	10851676	10875953	24278	-	35780	NM_003651.4	YBX3	8531	1.28182	2.39474	13.2828	0.000791858	0.0693222	up
NM_001243328.1	chr6	150204511	150217195	12685	-	20707	NM_001243328.1	RAET1E	135250	1.20275	0.296773	13.275	0.000794313	0.0693222	up
NM_181712.4	chr1	62701837	62785083	83247	-	4004	NM_181712.4	KANK4	163782	-1.07348	1.12632	13.2189	0.000812127	0.0699218	down
NM_014059.2	chr13	42031542	42045013	13472	+	37164	NM_014059.2	RGCC	28984	0.605479	8.45287	13.2187	0.000812206	0.0699218	up
NR_026658.1	chr12	54472623	54475607	2985	-	36225	NR_026658.1	LOC100240735	100240735	2.38267	-1.3532	13.829	0.000812311	0.0699218	up
NM_005565.4	chr5	169673237	169724846	51610	-	17685	NM_005565.4	LCP2	3937	1.08296	4.60898	13.1113	0.000847502	0.0726194	up
NM_003370.3	chr19	46010688	46030241	19554	+	49758	NM_003370.3	VASP	7408	0.743487	6.41283	13.0804	0.000857973	0.0729049	up
NM_005582.2	chr5	66478103	66492617	14515	-	16950	NM_005582.2	CD180	4064	1.3671	2.1234	13.0786	0.000858569	0.0729049	up
NM_138786.3	chr3	149036285	149051548	15264	-	12606	NM_138786.3	TM4SF18	116441	2.50226	-0.843239	13.0083	0.000882898	0.0745269	up
NM_001170704.1	chrX	131503342	131623996	120655	-	57817	NM_001170704.1	MBNL3	55796	-2.17534	-1.3133	13.5755	0.000891191	0.0745269	down
NM_032782.4	chr5	156512843	156536248	23406	-	17619	NM_032782.4	HAVCR2	84868	1.12119	5.04071	12.9791	0.000893228	0.0745269	up
NM_052864.2	chr4	113196782	113207059	10278	-	14834	NM_052864.2	TIFA	92610	0.8721	3.9887	12.9784	0.000893484	0.0745269	up
NM_017639.3	chr4	155155527	155312449	156923	-	15032	NM_017639.3	DCHS2	54798	-0.875379	4.4551	12.9571	0.000901086	0.0748298	down
NM_000442.4	chr17	62396775	62404856	8082	-	47233	NM_000442.4	PECAM1	5175	1.07058	7.44985	12.9081	0.000918837	0.0759692	up
NM_000223.3	chr17	39017430	39023462	6033	-	46741	NM_000223.3	KRT12	3859	-2.17569	-1.3374	13.6187	0.000929876	0.0765462	down
NR_003237.1	chr14	101411986	101412056	71	+	38935	NR_003237.1	SNORD113-9	767569	-2.23663	-1.26072	13.4118	0.000946497	0.0772787	down
NM_014918.4	chr15	101715928	101792137	76210	-	41998	NM_014918.4	CHSY1	22856	0.767525	6.89437	12.8325	0.000946973	0.0772787	up
NM_005461.4	chr20	39314488	39317880	3393	-	53487	NM_005461.4	MAFB	9935	0.929972	5.20079	12.8092	0.000955841	0.0776662	up
NM_153006.2	chr17	42082032	42086436	4405	+	45193	NM_153006.2	NAGS	162417	0.992156	2.85188	12.7938	0.000961731	0.0778094	up
NR_024031.2	chr4	53578561	53580305	1745	+	13419	NR_024031.2	DANCR	57291	0.407819	6.5756	12.7738	0.000969447	0.078064	up
NM_003830.3	chr19	52114756	52133727	18972	-	51845	NM_003830.3	SIGLEC5	8778	1.24723	1.33031	12.7613	0.000974299	0.078064	up
NM_003786.3	chr17	48712218	48769063	56846	+	45425	NM_003786.3	ABCC3	8714	2.04541	0.0588444	12.7537	0.000977301	0.078064	up
NM_001248006.1	chr11	6469843	6495689	25847	-	32614	NM_001248006.1	TRIM3	10612	-2.17315	-1.39063	13.2633	0.00099985	0.0795281	down
NM_002962.1	chr1	153509623	153514241	4619	-	4673	NM_002962.1	S100A5	6276	2.1073	-1.39544	13.2376	0.00100937	0.0799483	up
NM_001785.2	chr1	20915444	20945401	29958	+	353	NM_001785.2	CDA	978	1.20714	3.4039	12.6164	0.00103259	0.0813347	up
NM_002216.2	chr10	7745236	7791483	46248	+	27924	NM_002216.2	ITIH2	3698	-0.974353	4.59933	12.6056	0.00103704	0.0813347	down
NM_005044.4	chrX	3522384	3631675	109292	-	57026	NM_005044.4	PRKX	5613	1.03655	5.43768	12.5858	0.00104532	0.0813347	up
NM_004666.2	chr6	133001997	133035194	33198	-	20561	NM_004666.2	VNN1	8876	1.62079	0.508313	12.5796	0.00104794	0.0813347	up
NM_000566.3	chr1	149754250	149764074	9825	+	1643	NM_000566.3	FCGR1A	2209	1.93855	-0.0284211	12.5613	0.0010557	0.0813347	up
NM_005252.3	chr14	75745481	75748937	3457	+	38661	NM_005252.3	FOS	2353	-1.16876	7.81074	12.5551	0.00105831	0.0813347	down
NM_002055.4	chr17	42982994	42992920	9927	-	46931	NM_002055.4	GFAP	2670	1.17364	14.2101	12.553	0.00105921	0.0813347	up
NM_032193.3	chr11	65485144	65488409	3266	-	33286	NM_032193.3	RNASEH2C	84153	0.359378	6.28903	12.5406	0.00106453	0.0813347	up
NR_134590.1	chr6	168625959	168627197	1239	-	20829	NR_134590.1	LOC105378137	105378137	-2.3988	-1.04318	12.5349	0.00106697	0.0813347	down
NM_002003.4	chr9	137795082	137809849	14768	-	27717	NM_002003.4	FCN1	2219	2.00251	2.50752	12.5264	0.0010706	0.0813347	up
NM_001347619.1	chr1	22970110	22974604	4495	+	387	NM_001347619.1	C1QC	714	2.61861	-1.21958	13.0695	0.00107434	0.0813347	up
NM_015559.2	chr18	42260863	42648475	387613	+	47861	NM_015559.2	SETBP1	26040	-0.530425	5.43108	12.467	0.00109653	0.0826191	down
NM_005759.5	chr2	204192962	204296896	103935	+	7321	NM_005759.5	ABI2	10152	-2.05849	-1.01747	13.006	0.00110007	0.0826191	down
NM_181538.2	chr7	99520892	99527243	6352	-	23025	NM_181538.2	GJC3	349149	1.14342	1.2636	12.4275	0.0011141	0.0832874	up
NM_181844.3	chr17	6926369	6932961	6593	+	44542	NM_181844.3	BCL6B	255877	1.16346	4.53587	12.4193	0.0011178	0.0832874	up
NR_103549.1	chr5	90606731	90610219	3489	-	17095	NR_103549.1	LUCAT1	100505994	2.30618	-1.1844	12.9375	0.0011285	0.0837533	up
NM_003673.3	chr17	37821599	37822807	1209	+	45040	NM_003673.3	TCAP	8557	1.18242	3.87377	12.383	0.00113432	0.0838554	up
NM_001287444.1	chr2	3751182	3895001	143820	+	5783	NM_001287444.1	DCDC2C	728597	1.8003	-0.870234	12.3264	0.00116056	0.0852773	up
NM_176870.2	chr16	56666534	56667898	1365	+	42807	NM_176870.2	MT1M	4499	1.06135	6.86849	12.322	0.0011626	0.0852773	up
NM_002053.2	chr1	89517987	89531043	13057	-	4156	NM_002053.2	GBP1	2633	1.34259	5.46625	12.2915	0.00117702	0.0860002	up
NM_012125.3	chr15	34261089	34357287	96199	+	40154	NM_012125.3	CHRM5	1133	2.39349	-0.841245	12.2736	0.00118558	0.086291	up
NM_004946.2	chr5	169064251	169510386	446136	+	16434	NM_004946.2	DOCK2	1794	1.36812	3.9428	12.2441	0.00119984	0.086993	up
NM_031310.2	chr19	17462257	17488158	25902	-	50961	NM_031310.2	PLVAP	83483	1.18938	2.76422	12.1637	0.0012396	0.0891737	up
NM_005195.3	chr8	48649476	48650726	1251	-	24871	NM_005195.3	CEBPD	1052	1.2376	7.57104	12.155	0.001244	0.0891737	up
NM_001778.3	chr1	160648536	160681641	33106	-	4989	NM_001778.3	CD48	962	2.01497	0.100163	12.1548	0.00124411	0.0891737	up
NM_007191.4	chr12	65444404	65515346	70943	-	36415	NM_007191.4	WIF1	11197	-0.984883	8.98454	12.1301	0.00125663	0.0892036	down
NR_134275.1	chr5	17404128	17441803	37676	+	15290	NR_134275.1	LOC101929544	NA	-2.02709	-1.0723	12.128	0.00125774	0.0892036	down
NM_001015.4	chr19	49999622	50002969	3348	+	49908	NM_001015.4	RPS11	6205	0.361583	9.30619	12.1175	0.0012631	0.0892036	up
NM_032881.2	chr1	36859021	36863560	4540	-	3615	NM_032881.2	LSM10	84967	0.359012	6.58508	12.109	0.00126748	0.0892036	up
NM_004557.3	chr6	32162620	32191844	29225	-	19785	NM_004557.3	NOTCH4	4855	1.26481	1.51875	12.1076	0.00126819	0.0892036	up
NM_003596.3	chr7	65670259	65825438	155180	+	21401	NM_003596.3	TPST1	8460	0.451687	6.07292	12.0858	0.00127947	0.0896626	up
NM_000189.4	chr2	75059782	75120481	60700	+	6374	NM_000189.4	HK2	3099	0.776511	4.55032	12.0388	0.00130418	0.0908552	up
NM_015675.3	chr19	2476123	2478257	2135	+	48570	NM_015675.3	GADD45B	4616	0.865661	7.29694	12.0351	0.00130612	0.0908552	up
NM_002155.4	chr1	161494330	161496687	2358	+	2081	NM_002155.4	HSPA6	3310	1.72357	2.35491	12.011	0.00131904	0.0910822	up
NM_001190452.1	chr17	22022437	22023991	1555	+	44832	NM_001190452.1	MTRNR2L1	100462977	3.07655	-0.20595	12.011	0.00131905	0.0910822	up
NM_000756.3	chr8	67088612	67090880	2269	-	24960	NM_000756.3	CRH	1392	-1.3761	3.15219	11.898	0.00138126	0.09503	down
NM_001012.1	chr1	45241246	45244412	3167	+	864	NM_001012.1	RPS8	6202	0.383127	8.30987	11.8822	0.00139024	0.0952996	up
NM_001002029.3	chr6	31982572	32003195	20624	+	18307	NM_001002029.3	C4B	721	1.6163	4.88335	11.8624	0.0014015	0.095714	up
NM_015464.2	chr7	16501106	16505474	4369	-	22403	NM_015464.2	SOSTDC1	25928	-1.621	0.765046	11.8538	0.00140644	0.095714	down
NR_038966.1	chr7	157647277	157658784	11508	+	22273	NR_038966.1	LOC100506585	100506585	1.19864	1.079	11.8202	0.00142594	0.0965922	up
NM_006705.3	chr9	92219927	92221470	1544	+	26025	NM_006705.3	GADD45G	10912	0.750403	4.79151	11.8139	0.00142959	0.0965922	up
NM_001201483.1	chr1	8921059	8931635	10577	-	3160	NM_001201483.1	ENO1	2023	-0.96888	0.548308	11.7623	0.00146016	0.0983055	down
NM_000840.2	chr7	86273230	86494192	220963	+	21556	NM_000840.2	GRM3	2913	-0.453055	9.45514	11.7309	0.0014791	0.0992263	down
NM_006581.3	chr6	96463845	96663488	199644	+	18812	NM_006581.3	FUT9	10690	-0.446698	8.29501	11.712	0.00149062	0.0996444	down
NM_182565.3	chr17	74261286	74267379	6094	+	45753	NM_182565.3	UBALD2	283991	0.51356	6.76663	11.6924	0.00150264	0.0998376	up
NM_015175.2	chr3	47021173	47051194	30022	+	10213	NM_015175.2	NBEAL2	23218	0.818975	4.30966	11.69	0.0015041	0.0998376	up
NM_152445.2	chr14	74399695	74417117	17423	-	39669	NM_152445.2	FAM161B	145483	-0.373569	5.86398	11.6616	0.0015218	0.100027	down
NM_000416.2	chr6	137518621	137540567	21947	-	20622	NM_000416.2	IFNGR1	3459	0.617961	7.59811	11.6594	0.00152316	0.100027	up
NR_110796.1	chr18	21574177	21595424	21248	-	48167	NR_110796.1	TTC39C-AS1	102724246	1.10936	0.682337	11.6542	0.00152643	0.100027	up
NM_001871.2	chr3	148545588	148577974	32387	+	11020	NM_001871.2	CPB1	1360	1.35541	0.383085	11.6514	0.00152819	0.100027	up
NM_003740.3	chr6	39156747	39197251	40505	-	19944	NM_003740.3	KCNK5	8645	1.02348	-0.0879228	11.6208	0.00154752	0.100942	up
NM_004120.4	chr1	89571815	89591842	20028	-	4157	NM_004120.4	GBP2	2634	1.17738	5.62189	11.5942	0.00156455	0.101353	up
NM_016459.3	chr5	138723257	138725605	2349	-	17404	NM_016459.3	MZB1	51237	2.71347	-0.194278	11.5942	0.00156457	0.101353	up
NM_152309.2	chr10	98353069	98480279	127211	-	30212	NM_152309.2	PIK3AP1	118788	1.21997	4.76803	11.5282	0.00160771	0.103312	up
NM_015692.2	chr19	17003762	17137625	133864	-	50951	NM_015692.2	CPAMD8	27151	1.2952	3.69284	11.5275	0.00160815	0.103312	up
NM_001007595.2	chr15	62455737	62457482	1746	-	41451	NM_001007595.2	C2CD4B	388125	1.75219	3.2191	11.5228	0.00161126	0.103312	up
NM_015136.2	chr3	52529356	52558511	29156	+	10374	NM_015136.2	STAB1	23166	1.02389	5.32633	11.4645	0.00165054	0.105473	up
NM_005306.2	chr19	35940617	35942669	2053	+	49329	NM_005306.2	FFAR2	2867	1.70487	-0.21284	11.4469	0.00166257	0.105882	up
NM_003155.2	chr8	23699434	23712320	12887	-	24706	NM_003155.2	STC1	6781	1.58949	3.50259	11.3997	0.00169531	0.107604	up
NM_032587.3	chr5	40841410	40855456	14047	+	15376	NM_032587.3	CARD6	84674	0.986225	4.10026	11.3863	0.00170478	0.107673	up
NM_005797.3	chr11	118124131	118135251	11121	-	33867	NM_005797.3	MPZL2	10205	1.63567	3.38991	11.382	0.00170783	0.107673	up
NM_020650.2	chr19	50030875	50046890	16016	+	49912	NM_020650.2	RCN3	57333	0.53814	3.53551	11.3609	0.0017228	0.108255	up
NM_015312.3	chr4	123091758	123283914	192157	+	13815	NM_015312.3	KIAA1109	84162	-0.44795	8.73218	11.3442	0.00173473	0.108642	down
NR_030766.1	chr7	57233377	57247863	14487	-	22742	NR_030766.1	GUSBP10	642006	-2.07955	-1.38244	11.7883	0.0017451	0.108653	down
NM_001099409.1	chr11	65343509	65360116	16608	+	31655	NM_001099409.1	EHBP1L1	254102	0.549587	6.40193	11.3261	0.00174778	0.108653	up
NM_004273.4	chr10	73724120	73773322	49203	+	28529	NM_004273.4	CHST3	9469	0.532137	6.48431	11.3201	0.00175219	0.108653	up
NM_000984.5	chr17	27047000	27051374	4375	+	44857	NM_000984.5	RPL23A	6147	0.385223	4.8448	11.3031	0.00176458	0.109063	up
NR_038996.1	chr12	109489846	109491770	1925	-	36716	NR_038996.1	USP30-AS1	100131733	1.73528	-0.550353	11.2833	0.00177909	0.109348	up
NM_022107.2	chr6	32158543	32163300	4758	-	19784	NM_022107.2	GPSM3	63940	2.33421	-1.18927	11.7333	0.00178253	0.109348	up
NM_005092.3	chr1	173010360	173020103	9744	-	5142	NM_005092.3	TNFSF18	8995	2.78407	-0.335176	11.251	0.00180316	0.109348	up
NM_173515.2	chr6	154726433	154831753	105321	-	20737	NM_173515.2	CNKSR3	154043	0.700531	5.6562	11.2457	0.00180712	0.109348	up
NM_021149.3	chr16	84599202	84651702	52501	-	44303	NM_021149.3	COTL1	23406	0.591597	8.31358	11.2401	0.00181134	0.109348	up
NM_001348107.1	chr9	35909480	35911617	2138	+	25808	NM_001348107.1	LINC00961	NA	0.964266	3.24392	11.232	0.00181743	0.109348	up
NM_025159.2	chrX	30576941	30596033	19093	-	57167	NM_025159.2	CXorf21	80231	1.51243	0.920316	11.2298	0.00181907	0.109348	up
NM_002163.2	chr16	85932774	85956212	23439	+	43236	NM_002163.2	IRF8	3394	1.22589	4.20997	11.2263	0.00182174	0.109348	up
NM_080614.1	chr20	44402847	44420547	17701	-	53538	NM_080614.1	WFDC3	140686	0.859906	1.10681	11.2243	0.00182324	0.109348	up
NM_133471.3	chr6	30644166	30655672	11507	-	19667	NM_133471.3	PPP1R18	170954	1.30529	2.88482	11.2191	0.0018272	0.109348	up
NM_175900.3	chr16	29753784	29757340	3557	-	43847	NM_175900.3	C16orf54	283897	1.28033	0.69635	11.2026	0.0018398	0.109753	up
NM_001112706.2	chr7	12610203	12693228	83026	+	20986	NM_001112706.2	SCIN	85477	1.51664	1.57553	11.1057	0.00191555	0.113912	up
NM_000101.3	chr16	88709697	88717492	7796	-	44341	NM_000101.3	CYBA	1535	0.628686	7.00241	11.0451	0.00196454	0.116458	up
NM_001282714.1	chr3	58549839	58613337	63499	-	12078	NM_001282714.1	FAM107A	11170	0.937581	3.89011	11.0111	0.00199266	0.117755	up
NM_000112.3	chr5	149340300	149366963	26664	+	16303	NM_000112.3	SLC26A2	1836	0.746463	5.60756	10.9682	0.00202876	0.119286	up
NM_016132.4	chr15	48431625	48470558	38934	-	41302	NM_016132.4	MYEF2	50804	1.90767	-1.36546	11.3967	0.00203123	0.119286	up
NM_001288.4	chr6	31698358	31704341	5984	-	19738	NM_001288.4	CLIC1	1192	1.37616	0.287877	10.94	0.00205281	0.120179	up
NM_000552.4	chr12	6058040	6233841	175802	-	35617	NM_000552.4	VWF	7450	0.947797	9.83881	10.9227	0.00206778	0.120468	up
NM_000327.3	chr11	62380213	62382592	2380	+	31506	NM_000327.3	ROM1	6094	0.781583	6.70189	10.9195	0.00207054	0.120468	up
NM_002990.4	chr16	57392695	57400102	7408	+	42841	NM_002990.4	CCL22	6367	2.0271	0.0476067	10.8999	0.00208763	0.120725	up
NR_003714.1	chr22	24647589	24661492	13904	+	54786	NR_003714.1	POM121L9P	29774	1.5275	-0.590865	10.8876	0.0020984	0.120725	up
NM_001300790.1	chr6	32723875	32731330	7456	-	19799	NM_001300790.1	HLA-DQB2	3120	1.54951	-0.089379	10.8856	0.00210019	0.120725	up
NM_002121.5	chr6	33043703	33057473	13771	+	18338	NM_002121.5	HLA-DPB1	3115	0.949678	6.23098	10.8851	0.00210056	0.120725	up
NM_001023563.3	chr19	57752053	57774106	22054	+	50310	NM_001023563.3	ZNF805	390980	-1.90786	-1.42356	12.0247	0.00212946	0.122014	down
NM_001285448.1	chr16	15068660	15132187	63528	+	42371	NM_001285448.1	PDXDC1	23042	2.13865	-1.28478	10.8428	0.00213822	0.122144	up
NM_001297422.1	chr12	1025372	1058888	33517	-	35571	NM_001297422.1	RAD52	5893	-2.09159	-1.03702	10.8285	0.00215111	0.122509	down
NM_016332.3	chr16	1988230	1993327	5098	-	43451	NM_016332.3	MSRB1	51734	0.380469	6.33703	10.8169	0.0021616	0.122736	up
NR_027040.1	chr7	149564783	149570951	6169	-	23470	NR_027040.1	ATP6V0E2-AS1	401431	-0.445409	4.4752	10.7796	0.00219576	0.123946	down
NM_001733.4	chr12	7187513	7245043	57531	-	35678	NM_001733.4	C1R	715	0.980712	6.88492	10.7792	0.00219607	0.123946	up
NM_006931.2	chr12	8071824	8088892	17069	-	35701	NM_006931.2	SLC2A3	6515	0.780127	7.28995	10.7618	0.00221224	0.1242	up
NR_027484.2	chr1	149369294	149378303	9010	+	1635	NR_027484.2	FCGR1CP	100132417	2.0065	-0.877046	10.7484	0.00222471	0.1242	up
NR_038908.1	chr11	128561567	128565918	4352	-	34029	NR_038908.1	SENCR	100507392	0.968158	2.41463	10.7468	0.00222621	0.1242	up
NM_001142594.2	chr14	93403259	93582264	179006	-	39833	NM_001142594.2	ITPK1	3705	0.679665	3.31589	10.7411	0.00223156	0.1242	up
NM_004089.3	chrX	106956451	106960291	3841	-	57668	NM_004089.3	TSC22D3	1831	0.68728	4.04497	10.7348	0.0022375	0.1242	up
NR_135176.1	chr16	1630528	1660329	29802	+	42121	NR_135176.1	LOC105371046	105371046	1.91357	-0.841431	10.7265	0.00224532	0.1242	up
NM_025157.4	chr12	120648242	120687964	39723	-	36870	NM_025157.4	PXN	5829	1.95403	-0.903153	10.7251	0.00224668	0.1242	up
NM_198946.2	chr9	139638469	139642980	4512	-	27760	NM_198946.2	LCN6	158062	1.53191	0.230885	10.6914	0.00227883	0.125609	up
NR_131012.1	chr11	65190269	65213011	22743	+	31642	NR_131012.1	NEAT1	283131	1.74572	6.53349	10.6525	0.00231651	0.127313	up
NM_001256630.1	chr11	1432382	1483919	51538	+	30729	NM_001256630.1	BRSK2	9024	-1.90845	-1.25558	10.6374	0.00233127	0.127752	down
NM_003012.4	chr8	41119476	41166990	47515	-	24837	NM_003012.4	SFRP1	6422	-0.589338	7.39657	10.5513	0.00241763	0.132101	down
NM_030622.7	chr19	41699112	41713444	14333	+	49588	NM_030622.7	CYP2S1	29785	1.03561	1.62166	10.4893	0.00248202	0.134978	up
NR_026951.1	chr17	8123948	8127361	3414	-	46248	NR_026951.1	LINC00324	284029	0.573377	2.01494	10.4868	0.00248462	0.134978	up
NM_178840.3	chr1	16330731	16333190	2460	+	282	NM_178840.3	C1orf64	NA	0.921396	6.07299	10.4761	0.00249589	0.135201	up
NM_004454.2	chr3	185764106	185826901	62796	-	12875	NM_004454.2	ETV5	2119	-0.44876	7.58884	10.4607	0.00251222	0.135326	down
NM_003608.3	chr14	88471468	88481155	9688	+	38735	NM_003608.3	GPR65	8477	1.59447	1.97876	10.4604	0.00251256	0.135326	up
NM_003979.3	chr12	13043956	13066600	22645	+	34356	NM_003979.3	GPRC5A	9052	1.3574	0.673889	10.4438	0.00253032	0.135895	up
NM_182528.3	chr2	119913819	119916471	2653	-	8812	NM_182528.3	C1QL2	165257	-0.719188	5.5065	10.4342	0.00254063	0.136061	down
NM_033261.2	chr10	1064847	1071799	6953	-	29240	NM_033261.2	IDI2	91734	0.435597	3.45136	10.4255	0.00255008	0.13618	up
NM_006160.3	chr17	37760021	37764175	4155	-	46683	NM_006160.3	NEUROD2	4761	-1.59875	2.68104	10.4157	0.00256068	0.136292	down
NM_002935.2	chr14	21359562	21360507	946	+	38159	NM_002935.2	RNASE3	6037	1.82117	0.677371	10.4027	0.00257485	0.136292	up
NM_006022.3	chr13	45006279	45011060	4782	-	37756	NM_006022.3	TSC22D1	8848	0.569273	7.53075	10.402	0.00257559	0.136292	up
NR_135293.1	chr14	105127457	105131895	4439	-	39942	NR_135293.1	LOC101929634	NA	-1.47465	0.86801	10.3949	0.00258342	0.136292	down
NR_132656.1	chr3	152057487	152058779	1293	-	12647	NR_132656.1	TMEM14EP	645843	-2.01499	-1.23976	10.3904	0.00258833	0.136292	down
NM_001295.2	chr3	46243200	46249832	6633	-	11770	NM_001295.2	CCR1	1230	1.57515	4.1019	10.3754	0.00260486	0.136592	up
NM_052943.3	chr1	27331511	27339333	7823	-	3454	NM_052943.3	FAM46B	NA	0.805683	1.70958	10.3721	0.00260851	0.136592	up
NM_004444.4	chr7	100400187	100425143	24957	-	23076	NM_004444.4	EPHB4	2050	0.975019	5.53164	10.3288	0.00265699	0.138745	up
NM_005127.2	chr12	10004968	10022458	17491	-	35738	NM_005127.2	CLEC2B	9976	1.38155	4.56814	10.2984	0.0026916	0.140164	up
NM_016613.6	chr4	159045732	159093718	47987	-	15045	NM_016613.6	FAM198B	NA	-1.00601	0.802131	10.2754	0.00271813	0.141155	down
NM_001122679.1	chr5	166711843	167691162	979320	+	16418	NM_001122679.1	TENM2	57451	-0.701199	1.69395	10.2508	0.0027468	0.142253	down
NM_001278494.1	chr11	71820633	71823278	2646	-	33422	NM_001278494.1	ANAPC15	25906	1.12854	-0.264151	10.2425	0.00275651	0.142364	up
NM_001031801.1	chr22	31644348	31673624	29277	+	54931	NM_001031801.1	LIMK2	3985	0.858511	2.05361	10.1917	0.00281701	0.144814	up
NM_152914.2	chr17	21142183	21156578	14396	-	46449	NM_152914.2	NATD1	256302	0.370815	5.72928	10.1847	0.00282538	0.144814	up
NM_001242815.1	chr2	42162508	42180943	18436	-	8146	NM_001242815.1	C2orf91	400950	1.69187	-1.30837	10.5594	0.002827	0.144814	up
NM_022767.3	chr15	89164527	89175512	10986	+	40899	NM_022767.3	AEN	64782	0.555047	4.96915	10.1749	0.00283719	0.144943	up
NM_003486.6	chr16	87863622	87903105	39484	-	44337	NM_003486.6	SLC7A5	8140	0.884576	9.64685	10.1138	0.0029124	0.148383	up
NR_120517.1	chr7	87845975	87859083	13109	+	21582	NR_120517.1	LOC102723885	102723885	1.90234	-1.27959	10.4724	0.0029272	0.148735	up
NM_004345.4	chr3	48264837	48266981	2145	+	10225	NM_004345.4	CAMP	820	-2.03664	-0.210309	10.0735	0.00296301	0.15015	down
NM_138693.3	chr7	130417382	130418860	1479	-	23319	NM_138693.3	KLF14	136259	-1.68441	-0.547056	10.0621	0.00297761	0.150485	down
NM_025098.3	chr11	75428864	75444003	15140	+	31901	NM_025098.3	MOGAT2	80168	2.06491	-1.30629	10.0552	0.00298645	0.150528	up
NM_001136482.1	chr19	10959106	10980360	21255	+	48837	NM_001136482.1	C19orf38	255809	0.904209	2.2026	10.0345	0.003013	0.151461	up
NM_001271856.1	chr12	52404276	52409673	5398	+	34665	NM_001271856.1	GRASP	160622	-1.56063	-0.861209	10.027	0.0030228	0.15155	down
NM_020529.2	chr14	35870716	35873960	3245	-	39356	NM_020529.2	NFKBIA	4792	0.70588	7.75773	10.0099	0.00304501	0.152158	up
NM_002167.4	chr1	23884421	23886285	1865	-	3364	NM_002167.4	ID3	3399	0.837683	7.25784	10.0034	0.00305355	0.152158	up
NM_002118.4	chr6	32902406	32908847	6442	-	19808	NM_002118.4	HLA-DMB	3109	1.16855	4.51947	9.99374	0.0030662	0.152158	up
NM_130769.3	chr11	64701943	64703360	1418	-	33251	NM_130769.3	GPHA2	170589	1.63933	-0.911501	9.99283	0.00306741	0.152158	up
NM_001080448.2	chr3	96533425	97467786	934362	+	10542	NM_001080448.2	EPHA6	285220	-0.80762	3.31652	9.98381	0.00307931	0.152158	down
NR_024470.1	chr20	61294379	61297973	3595	-	53761	NR_024470.1	SLCO4A1-AS1	100127888	1.59505	-0.485295	9.98075	0.00308336	0.152158	up
NR_134631.1	chr22	41947713	41956887	9175	-	55700	NR_134631.1	LOC105373044	105373044	1.38787	0.0578882	9.9216	0.00316279	0.155654	up
NM_020400.5	chr12	6728001	6745297	17297	-	35647	NM_020400.5	LPAR5	57121	1.78109	-1.25679	10.2725	0.00317224	0.155654	up
NM_002117.5	chr6	31236526	31239913	3388	-	19696	NM_002117.5	HLA-C	3107	0.560276	9.22495	9.90973	0.00317898	0.155654	up
NR_125730.1	chr19	1021521	1021627	107	+	48515	NR_125730.1	RNU6-2	103625684	1.46613	-0.0375966	9.89401	0.00320057	0.156066	up
NM_015167.2	chr17	74714524	74722881	8358	-	47438	NM_015167.2	JMJD6	23210	0.843402	1.93974	9.89089	0.00320487	0.156066	up
NM_174932.2	chr22	32809834	32853373	43540	-	55552	NM_174932.2	BPIFC	254240	-2.13326	-1.17769	10.2297	0.00322757	0.156066	down
NM_005477.2	chr15	73612200	73661605	49406	-	41635	NM_005477.2	HCN4	10021	-1.09021	3.43362	9.87264	0.00323016	0.156066	down
NM_001289.5	chrX	154505496	154563990	58495	-	58074	NM_001289.5	CLIC2	1193	0.989302	5.12801	9.87251	0.00323036	0.156066	up
NM_053050.4	chr2	74699085	74699942	858	-	8461	NM_053050.4	MRPL53	116540	0.299165	6.19482	9.865	0.00324082	0.156066	up
NM_139265.3	chr15	42191638	42264755	73118	-	41225	NM_139265.3	EHD4	30844	0.624401	4.99199	9.85818	0.00325036	0.156066	up
NM_006593.3	chr2	162272605	162282378	9774	+	6956	NM_006593.3	TBR1	10716	-2.35915	2.64556	9.85424	0.00325589	0.156066	down
NM_001130517.2	chr22	37415683	37425863	10181	+	54986	NM_001130517.2	MPST	4357	1.61991	-0.921368	9.84375	0.00327064	0.156066	up
NM_001127183.2	chr2	201983269	202037411	54143	+	7274	NM_001127183.2	CFLAR	8837	0.587552	2.26851	9.84044	0.00327532	0.156066	up
NM_199054.2	chr19	2037470	2051243	13774	-	50490	NM_199054.2	MKNK2	2872	0.539535	6.72281	9.83336	0.00328533	0.156066	up
NM_001971.5	chr12	51722227	51740463	18237	-	36148	NM_001971.5	CELA1	1990	1.95768	-1.36863	10.166	0.00331168	0.156066	up
NM_006764.4	chr3	50325163	50330026	4864	-	11946	NM_006764.4	IFRD2	7866	0.360478	5.28836	9.81139	0.00331662	0.156066	up
NM_002898.3	chr12	56915609	56989980	74372	+	34821	NM_002898.3	RBMS2	5939	0.812706	6.80368	9.81095	0.00331726	0.156066	up
NM_024656.3	chr19	17666403	17693971	27569	+	49044	NM_024656.3	COLGALT1	79709	0.388714	6.14395	9.8092	0.00331977	0.156066	up
NM_001288773.2	chr19	42055886	42093197	37312	+	49609	NM_001288773.2	CEACAM21	90273	1.60999	-0.298987	9.80914	0.00331985	0.156066	up
NM_020923.2	chr2	207139365	207179151	39787	+	7345	NM_020923.2	ZDBF2	57683	-1.93332	-1.05712	9.78937	0.0033483	0.157012	down
NR_120528.1	chr11	35154197	35159579	5383	-	32889	NR_120528.1	LOC100507144	100507144	2.12085	-1.00738	9.78181	0.00335927	0.157135	up
NM_004171.3	chr11	35272752	35441105	168354	-	32890	NM_004171.3	SLC1A2	6506	-1.05271	6.95577	9.76515	0.00338353	0.157879	down
NM_001814.5	chr11	88026760	88070955	44196	-	33578	NM_001814.5	CTSC	1075	0.95828	4.89627	9.74852	0.00340794	0.158625	up
NM_001231.4	chr1	160160285	160171676	11392	+	2023	NM_001231.4	CASQ1	844	-0.631681	2.91745	9.71611	0.00345606	0.160239	down
NR_039742.1	chr16	28969904	28969982	79	+	42564	NR_039742.1	MIR4517	100616487	-1.92929	-1.26103	9.71374	0.00345961	0.160239	down
NM_001290271.1	chr19	55084464	55099027	14564	+	50190	NM_001290271.1	LILRA2	11027	1.72717	-1.2202	9.70665	0.00347024	0.160241	up
NM_002349.3	chr2	160659866	160761267	101402	-	9039	NM_002349.3	LY75	4065	0.766898	2.70928	9.70238	0.00347665	0.160241	up
NM_018142.2	chr8	19674918	19709589	34672	+	23692	NM_018142.2	INTS10	55174	0.278062	6.78368	9.67317	0.00352091	0.161885	up
NM_002258.2	chr12	9747870	9760497	12628	-	35733	NM_002258.2	KLRB1	3820	-1.57231	0.28604	9.6613	0.00353908	0.162324	down
NM_004757.3	chr4	107236853	107270382	33530	+	13733	NM_004757.3	AIMP1	9255	1.97754	-1.31126	9.95812	0.00360342	0.164874	up
NM_001039792.1	chr9	35906189	35907138	950	+	25807	NM_001039792.1	HRCT1	646962	0.691324	3.03678	9.59032	0.00364976	0.165948	up
NM_006834.4	chr6	146864828	146876092	11265	+	19128	NM_006834.4	RAB32	10981	0.593627	4.08991	9.58717	0.00365477	0.165948	up
NR_024048.2	chrX	153639854	153650065	10212	+	56959	NR_024048.2	TAZ	6901	-1.80837	-1.25658	9.91741	0.00366371	0.165948	down
NM_031302.4	chr12	104382761	104457955	75195	-	36680	NM_031302.4	GLT8D2	83468	1.84381	-1.43969	11.1889	0.0036709	0.165948	up
NM_001007024.1	chr17	28804426	28853832	49407	+	44890	NM_001007024.1	GOSR1	9527	1.90824	-1.42813	11.7018	0.0036709	0.165948	up
NM_145273.3	chr17	41924516	41940997	16482	+	45190	NM_145273.3	CD300LG	146894	-1.23528	0.638323	9.56539	0.00368951	0.165956	down
NR_029409.1	chr11	1330938	1331937	1000	+	30723	NR_029409.1	TOLLIP-AS1	255512	0.463715	3.3952	9.55715	0.00370275	0.165956	up
NM_133468.4	chr7	33944523	34195484	250962	+	21199	NM_133468.4	BMPER	168667	-0.626766	4.80422	9.55665	0.00370355	0.165956	down
NM_032251.5	chr11	64107690	64125006	17317	+	31596	NM_032251.5	CCDC88B	283234	0.574198	4.43085	9.54993	0.00371438	0.165956	up
NR_027247.2	chr1	238025475	238091621	66147	+	2897	NR_027247.2	LOC100130331	100130331	-2.33817	-1.03595	9.54949	0.0037151	0.165956	down
NM_020309.3	chr19	49932655	49944808	12154	-	51681	NM_020309.3	SLC17A7	57030	-1.85099	5.46186	9.52343	0.00375745	0.167451	down
NM_001736.3	chr19	47813104	47825327	12224	+	49802	NM_001736.3	C5AR1	728	1.30008	3.45484	9.49776	0.00379967	0.168933	up
NM_024746.3	chr1	222695602	222721444	25843	-	5523	NM_024746.3	HHIPL2	79802	-1.91486	-0.772703	9.48182	0.00382614	0.169428	down
NM_017563.4	chr3	57124010	57199427	75418	-	12058	NM_017563.4	IL17RD	54756	-1.44311	-0.744586	9.47716	0.00383392	0.169428	down
NM_002122.3	chr6	32605183	32611429	6247	+	18323	NM_002122.3	HLA-DQA1	3117	1.16462	3.48475	9.47486	0.00383777	0.169428	up
NM_001130026.2	chr7	143412939	143427173	14235	+	22137	NM_001130026.2	TCAF2	285966	0.995779	1.43725	9.3942	0.0039752	0.174073	up
NR_121620.1	chr8	37263982	37351431	87450	-	24794	NR_121620.1	LINC01605	100507420	1.79905	0.2513	9.39105	0.00398068	0.174073	up
NM_000980.3	chr19	17970687	17974133	3447	+	49052	NM_000980.3	RPL18A	6142	0.544513	1.74893	9.38555	0.00399026	0.174073	up
NM_000728.3	chr11	15095146	15100177	5032	+	30975	NM_000728.3	CALCB	797	1.88854	0.991574	9.38473	0.00399167	0.174073	up
NM_001195081.1	chrX	9935398	9936042	645	+	55909	NM_001195081.1	CLDN34	100288814	-2.02112	-1.17486	9.3843	0.00399243	0.174073	down
NM_018957.3	chr22	38035684	38052050	16367	+	54999	NM_018957.3	SH3BP1	23616	0.836885	3.00957	9.37593	0.00400706	0.174073	up
NM_001199479.1	chr6	28193029	28201265	8237	+	18102	NM_001199479.1	ZSCAN9	7746	-1.81821	-1.19426	9.37076	0.00401612	0.174073	down
NM_014431.2	chr10	72238564	72328206	89643	+	28507	NM_014431.2	PALD1	27143	0.508676	6.69316	9.37028	0.00401696	0.174073	up
NM_000432.3	chr12	111348623	111358404	9782	-	36770	NM_000432.3	MYL2	4633	2.78848	-0.307564	9.36509	0.00402609	0.174073	up
NM_004597.6	chr19	46190712	46195574	4863	-	51525	NM_004597.6	SNRPD2	6633	1.69049	-1.24547	9.35264	0.00404806	0.174622	up
NM_198552.2	chr1	231154704	231175995	21292	-	5622	NM_198552.2	FAM89A	375061	0.658578	5.78167	9.34116	0.00406842	0.1751	up
NR_040093.1	chr5	110847924	111075423	227500	+	15828	NR_040093.1	STARD4-AS1	100505678	-0.673023	0.779364	9.33118	0.00408622	0.175466	down
NM_022728.3	chr7	31377075	31380538	3464	-	22509	NM_022728.3	NEUROD6	63974	-1.78065	1.36125	9.31849	0.00410899	0.176042	down
NR_132344.1	chr9	98868943	98878693	9751	-	27251	NR_132344.1	LOC158434	158434	1.15653	1.58353	9.30668	0.00413029	0.176182	up
NM_003005.3	chr1	169558087	169599377	41291	-	5115	NM_003005.3	SELP	6403	1.46452	-0.163142	9.30292	0.00413709	0.176182	up
NM_015529.3	chr6	132617194	132722673	105480	-	20550	NM_015529.3	MOXD1	26002	-0.910562	7.12217	9.29681	0.00414817	0.176182	down
NM_001039999.2	chr17	18874381	18908060	33680	-	46409	NM_001039999.2	FAM83G	644815	1.0024	1.31202	9.296	0.00414964	0.176182	up
NM_000418.3	chr16	27325230	27376099	50870	+	42524	NM_000418.3	IL4R	3566	1.30893	-0.332579	9.27595	0.00418626	0.177337	up
NR_003133.2	chr1	89873238	89890493	17256	+	1257	NR_003133.2	GBP1P1	400759	1.30248	2.12806	9.26904	0.00419896	0.177476	up
NM_015972.3	chr13	28195916	28197590	1675	+	37093	NM_015972.3	POLR1D	51082	0.394943	4.90875	9.24775	0.00423832	0.178739	up
NM_001305145.1	chr2	193041469	193059659	18191	-	9280	NM_001305145.1	TMEFF2	23671	-1.43419	-0.554665	9.23839	0.00425576	0.179074	down
NM_001318798.1	chr3	50192478	50226508	34031	+	10282	NM_001318798.1	SEMA3F	6405	1.29896	0.128793	9.22393	0.00428284	0.179502	up
NM_014734.3	chr14	70078310	70181861	103552	+	38583	NM_014734.3	SUSD6	9766	0.416395	6.76852	9.2178	0.00429439	0.179502	up
NM_005191.3	chr3	119243140	119278481	35342	-	12328	NM_005191.3	CD80	941	1.68324	-0.760939	9.21775	0.00429448	0.179502	up
NR_135140.1	chr12	42550906	42632170	81265	-	35970	NR_135140.1	YAF2	10138	1.69722	-1.25393	9.18735	0.0043522	0.181189	up
NM_001159749.1	chr5	96502450	96519005	16556	-	17141	NM_001159749.1	RIOK2	55781	1.60766	-0.837193	9.18106	0.00436423	0.181189	up
NM_198153.2	chr6	41196062	41206120	10059	+	18464	NM_198153.2	TREML4	285852	2.00735	-1.29839	9.49038	0.00436606	0.181189	up
NM_004673.3	chr1	178818670	178840215	21546	-	5192	NM_004673.3	ANGPTL1	9068	-0.868201	3.81597	9.17256	0.00438057	0.181189	down
NR_046693.1	chr13	33851691	33855471	3781	+	37123	NR_046693.1	STARD13-AS	100874241	1.625	-1.15775	9.17135	0.0043829	0.181189	up
NM_024600.5	chr16	1583658	1605581	21924	+	42120	NM_024600.5	TMEM204	79652	0.929606	2.58915	9.14504	0.0044339	0.182133	up
NM_000096.3	chr3	148890286	148939832	49547	-	12604	NM_000096.3	CP	1356	1.87417	4.41838	9.13841	0.00444685	0.182133	up
NR_121587.1	chr9	132044695	132047998	3304	+	26467	NR_121587.1	LOC101929331	101929331	1.45125	0.458416	9.13793	0.00444779	0.182133	up
NM_139174.3	chr16	84224723	84230772	6050	+	43206	NM_139174.3	ADAD2	161931	1.92861	-1.31463	9.13744	0.00444875	0.182133	up
NM_001816.3	chr19	43084395	43099082	14688	-	51416	NM_001816.3	CEACAM8	1088	-1.80609	-0.795824	9.13474	0.00445405	0.182133	down
NR_026544.1	chr12	47602203	47610226	8024	-	36010	NR_026544.1	PCED1B-AS1	100233209	1.18123	1.10221	9.12539	0.0044724	0.182488	up
NR_033984.1	chr16	85170756	85183049	12294	+	43224	NR_033984.1	LINC02139	400548	1.30056	0.0997008	9.11413	0.00449462	0.182896	up
NM_001282536.1	chr12	81651754	81906170	254417	-	36520	NM_001282536.1	PPFIA2	8499	-1.94137	-1.19226	9.11021	0.00450239	0.182896	down
NM_018176.3	chr4	25000471	25032414	31944	-	14332	NM_018176.3	LGI2	55203	0.854228	4.45846	9.1011	0.00452049	0.182896	up
NM_002558.3	chr17	3799885	3819960	20076	-	46054	NM_002558.3	P2RX1	5023	0.994097	0.523905	9.10073	0.00452122	0.182896	up
NM_019111.4	chr6	32407619	32412823	5205	+	18322	NM_019111.4	HLA-DRA	3122	1.10661	7.91097	9.09267	0.00453731	0.183154	up
NM_000597.2	chr2	217498127	217529159	31033	+	7427	NM_000597.2	IGFBP2	3485	1.11397	2.63619	9.08517	0.00455231	0.18328	up
NM_001310320.1	chr15	89441914	89456700	14787	-	41902	NM_001310320.1	MFGE8	4240	-1.84258	-0.992306	9.0814	0.00455988	0.18328	down
NM_000441.1	chr7	107301080	107358254	57175	+	21843	NM_000441.1	SLC26A4	5172	-0.55994	2.04446	9.06536	0.00459224	0.184188	down
NM_024599.5	chr17	74466975	74497509	30535	-	47425	NM_024599.5	RHBDF2	79651	2.01809	-1.33287	9.35863	0.00461108	0.184551	up
NM_019593.3	chr20	5525080	5591672	66593	-	53182	NM_019593.3	GPCPD1	56261	-0.615985	6.68814	9.04159	0.00464063	0.18534	down
NM_017723.2	chr9	140172280	140177093	4814	+	26682	NM_017723.2	TOR4A	54863	0.698371	4.58196	9.01289	0.00469979	0.187306	up
NM_005239.5	chr21	40177755	40196879	19125	+	54028	NM_005239.5	ETS2	2114	1.14201	0.426729	9.00379	0.00471872	0.187664	up
NM_002507.3	chr17	47572655	47592382	19728	+	45350	NM_002507.3	NGFR	4804	0.949787	4.69165	8.94435	0.00484435	0.192255	up
NR_073453.1	chr10	128102438	128110448	8011	-	30607	NR_073453.1	LINC00601	101101772	1.17413	-0.0644902	8.93053	0.00487407	0.193028	up
NR_126377.1	chr13	39106137	39260812	154676	-	37705	NR_126377.1	LINC00437	101929121	-1.04622	0.989854	8.92245	0.00489156	0.193314	down
NM_006033.3	chr18	47088401	47119278	30878	+	47885	NM_006033.3	LIPG	9388	1.81793	-1.34949	8.9057	0.00492797	0.194346	up
NM_153337.2	chr16	50700211	50715264	15054	-	43977	NM_153337.2	SNX20	124460	1.65281	-1.06211	8.89972	0.00494104	0.194454	up
NR_038371.1	chr7	53723202	53879624	156423	-	22703	NR_038371.1	LINC01446	401337	-1.90959	-1.34301	9.18537	0.00495614	0.194642	down
NM_003215.2	chr4	48137800	48271814	134015	-	14421	NM_003215.2	TEC	7006	1.06252	0.817821	8.87714	0.00499074	0.195593	up
NR_024009.1	chr22	46691040	46692557	1518	-	55779	NR_024009.1	GTSE1-AS1	NA	0.558482	2.00221	8.85193	0.00504684	0.197382	up
NM_023073.3	chr5	37106330	37249530	143201	-	16781	NM_023073.3	C5orf42	NA	-0.386633	5.81583	8.83342	0.00508848	0.198598	down
NM_001101340.1	chr19	50191942	50194247	2306	+	49935	NM_001101340.1	ADM5	199800	0.586469	3.46136	8.8239	0.00511003	0.198728	up
NM_001172646.1	chr20	9049701	9461463	411763	+	52330	NM_001172646.1	PLCB4	5332	-1.81317	-1.3282	9.11091	0.0051129	0.198728	down
NM_016228.3	chr4	170981373	171011183	29811	-	15096	NM_016228.3	AADAT	51166	-0.748362	0.60141	8.81686	0.00512603	0.198829	down
NM_000915.3	chr20	3052266	3053163	898	+	52243	NM_000915.3	OXT	5020	1.67584	-0.152103	8.80443	0.00515441	0.199519	up
NM_004585.4	chr11	63304273	63313930	9658	+	31535	NM_004585.4	RARRES3	NA	0.865146	6.3398	8.78918	0.00518947	0.200464	up
NR_027086.1	chr1	205523401	205525763	2363	-	5395	NR_027086.1	LOC284578	NA	-0.884655	0.846829	8.78058	0.00520934	0.200821	down
NR_134450.1	chr8	13487199	13490085	2887	+	23662	NR_134450.1	LOC102725080	102725080	1.88486	-1.2564	8.75701	0.00526424	0.202316	up
NM_001270546.1	chr15	86163181	86292589	129409	+	40881	NM_001270546.1	AKAP13	11214	-1.07243	-0.114476	8.75025	0.00528008	0.202316	down
NM_001710.5	chr6	31913721	31919861	6141	+	18299	NM_001710.5	CFB	629	0.946839	5.51593	8.74564	0.00529093	0.202316	up
NM_006678.4	chr17	72537204	72542310	5107	-	47310	NM_006678.4	CD300C	10871	1.50601	0.794389	8.74243	0.0052985	0.202316	up
NR_023384.1	chr7	5013616	5037800	24185	+	20928	NR_023384.1	RNF216P1	441191	-1.67942	-1.30197	8.7392	0.00530612	0.202316	down
NR_125724.1	chr12	66524531	66528229	3699	+	34924	NR_125724.1	LLPH-AS1	NA	1.48469	-0.250635	8.73388	0.00531869	0.202316	up
NM_003641.3	chr11	313991	315272	1282	+	30671	NM_003641.3	IFITM1	8519	0.876527	8.11166	8.72957	0.00532892	0.202316	up
NM_207174.1	chr21	43640008	43717354	77347	+	54077	NM_207174.1	ABCG1	9619	-1.99718	-1.34599	9.00999	0.00533398	0.202316	down
NM_001190702.1	chr11	10529434	10530723	1290	-	32683	NM_001190702.1	MTRNR2L8	100463486	1.63889	3.6897	8.71886	0.00535441	0.202562	up
NR_120522.1	chr7	29238656	29248586	9931	-	22484	NR_120522.1	LOC102724484	102724484	-1.83901	-1.35553	8.71124	0.00537261	0.202562	down
NM_024508.4	chr3	111311747	111314182	2436	-	12260	NM_024508.4	ZBED2	79413	1.47937	2.15941	8.7112	0.00537271	0.202562	up
NM_001252007.1	chr14	96968713	97001934	33222	+	38868	NM_001252007.1	PAPOLA	10914	1.24808	-0.0995188	8.67945	0.00544927	0.20449	up
NM_018946.3	chr9	100818959	100845365	26407	+	26115	NM_018946.3	NANS	54187	0.303104	5.85979	8.67874	0.00545101	0.20449	up
NM_001142470.2	chr6	107349376	107372790	23415	+	18858	NM_001142470.2	C6orf203	51250	-1.82659	-1.38064	8.95312	0.00546309	0.20449	down
NR_104367.2	chr15	57884102	58009755	125654	+	40475	NR_104367.2	GCOM1	145781	1.44624	-1.19522	8.93637	0.00550175	0.20449	up
NR_026859.1	chr15	30395935	30423951	28017	+	40120	NR_026859.1	ULK4P3	89837	-1.68467	-1.36808	8.84039	0.00550291	0.20449	down
NM_152679.3	chr4	48485360	48491541	6182	+	13398	NM_152679.3	SLC10A4	201780	-1.1865	4.69239	8.65335	0.00551309	0.20449	down
NM_002993.3	chr4	74702273	74704477	2205	+	13532	NM_002993.3	CXCL6	6372	1.50247	0.115536	8.6395	0.00554729	0.20449	up
NM_024689.2	chrX	45021555	45060146	38592	-	57221	NM_024689.2	CXorf36	NA	1.07132	2.59845	8.63807	0.00555082	0.20449	up
NM_000265.5	chr7	74188309	74203720	15412	+	21484	NM_000265.5	NCF1	653361	1.83705	-0.925544	8.63796	0.00555109	0.20449	up
NM_004268.4	chr11	93517405	93546496	29092	+	32013	NM_004268.4	MED17	9440	-0.308626	5.76143	8.63738	0.00555254	0.20449	down
NM_052907.3	chr12	125811162	126146923	335762	+	35476	NM_052907.3	TMEM132B	114795	-0.677698	4.54399	8.6372	0.00555297	0.20449	down
NM_024787.3	chr8	33405272	33424646	19375	-	24789	NM_024787.3	RNF122	79845	0.688446	3.03086	8.63678	0.00555403	0.20449	up
NM_001987.4	chr12	11802788	12048336	245549	+	34340	NM_001987.4	ETV6	2120	0.508222	5.32681	8.63116	0.00556798	0.204604	up
NM_001145545.1	chr16	27078219	27080487	2269	+	42520	NM_001145545.1	C16orf82	162083	-1.80929	-1.16873	8.62047	0.00559464	0.205184	down
NM_032849.3	chr13	31480312	31499709	19398	+	37113	NM_032849.3	MEDAG	84935	0.915245	1.3075	8.61305	0.00561321	0.205357	up
NM_000069.2	chr1	201008640	201081694	73055	-	5297	NM_000069.2	CACNA1S	779	-0.776083	2.74875	8.60989	0.00562114	0.205357	down
NM_002089.3	chr4	74962752	74964997	2246	-	14549	NM_002089.3	CXCL2	2920	1.79855	2.46458	8.58463	0.00568497	0.207287	up
NM_030979.2	chr13	25670276	25672705	2430	+	37073	NM_030979.2	PABPC3	5042	0.341615	6.39622	8.579	0.00569931	0.207409	up
NM_001001331.2	chr3	10365707	10547268	181562	-	11484	NM_001001331.2	ATP2B2	491	1.55208	-0.954341	8.56269	0.00574105	0.208525	up
NR_104152.1	chr17	69093915	69198320	104406	-	47287	NR_104152.1	CASC17	101928165	-1.41234	-0.532141	8.55373	0.00576413	0.208961	down
NM_152637.2	chr12	56075330	56078395	3066	+	34770	NM_152637.2	METTL7B	196410	0.868392	2.51413	8.53947	0.00580104	0.209895	up
NR_110054.1	chr7	642482	648139	5658	+	20866	NR_110054.1	LOC101926963	101926963	1.88171	-1.14407	8.53322	0.00581731	0.210081	up
NR_109952.1	chr22	38037839	38054384	16546	-	55616	NR_109952.1	LOC101927051	101927051	1.73513	-1.30677	8.49761	0.00591088	0.212614	up
NM_001287595.1	chr1	53552851	53608304	55454	-	3928	NM_001287595.1	SLC1A7	6512	1.88449	-1.27641	8.49752	0.00591111	0.212614	up
NM_001306093.1	chr18	72907063	72917468	10406	-	48451	NM_001306093.1	ZADH2	284273	-0.78537	-0.13283	8.48987	0.00593144	0.212614	down
NM_021103.3	chr2	85132763	85133799	1037	+	6399	NM_021103.3	TMSB10	9168	0.403516	9.96777	8.48864	0.00593471	0.212614	up
NR_120647.1	chr10	67331183	67526299	195117	+	28422	NR_120647.1	LINC01515	101928913	-1.34249	0.162738	8.48269	0.00595058	0.212614	down
NM_001323544.1	chr16	88880142	88923378	43237	-	44353	NM_001323544.1	GALNS	2588	-1.65487	-1.19854	8.47742	0.00596467	0.212614	down
NR_026716.2	chr19	55043909	55057050	13142	+	50186	NR_026716.2	KIR3DX1	90011	-2.4803	-0.354897	8.47677	0.00596641	0.212614	down
NM_006645.2	chr11	72465774	72504750	38977	-	33446	NM_006645.2	STARD10	10809	0.42001	7.30483	8.4558	0.00602282	0.213523	up
NR_110000.1	chr3	70048895	70064452	15558	+	10482	NR_110000.1	SAMMSON	101927152	-1.02728	0.0931949	8.45231	0.00603225	0.213523	down
NM_024954.4	chr10	99258639	99330967	72329	+	28860	NM_024954.4	UBTD1	80019	0.39961	5.96316	8.44782	0.00604445	0.213523	up
NM_005873.2	chr20	62704534	62710845	6312	-	53818	NM_005873.2	RGS19	10287	1.13668	0.127362	8.44715	0.00604626	0.213523	up
NR_038353.1	chr5	177433967	177476088	42122	+	16560	NR_038353.1	FAM153C	NA	-1.80978	-1.37854	8.71226	0.00604855	0.213523	down
NM_006270.4	chr19	50138549	50143400	4852	-	51686	NM_006270.4	RRAS	6237	0.525968	6.30157	8.42686	0.00610161	0.214993	up
NR_145132.1	chr13	44359764	44361116	1353	-	37749	NR_145132.1	ENOX1	55068	-0.714965	1.82725	8.41564	0.00613246	0.215677	down
NM_006080.2	chr7	83587659	83824217	236559	-	22883	NM_006080.2	SEMA3A	10371	-0.870463	5.59746	8.40737	0.00615531	0.216078	down
NM_018226.4	chr2	241508004	241518149	10146	+	7711	NM_018226.4	RNPEPL1	57140	0.511929	7.17803	8.39887	0.00617889	0.216134	up
NM_005953.3	chr16	56642478	56643409	932	+	42804	NM_005953.3	MT2A	4502	0.992644	9.01037	8.39852	0.00617985	0.216134	up
NM_001080483.2	chr9	136379708	136390068	10361	-	27699	NM_001080483.2	TMEM8C	NA	1.29284	0.948655	8.39358	0.0061936	0.216214	up
NM_001009.3	chr19	58898636	58906171	7536	+	50424	NM_001009.3	RPS5	6193	0.280214	8.47576	8.37435	0.00624742	0.21769	up
NM_002381.4	chr2	20191813	20212455	20643	-	7906	NM_002381.4	MATN3	4148	0.900345	4.64691	8.36397	0.00627667	0.218024	up
NR_136910.1	chr12	123868663	123893900	25238	+	35447	NR_136910.1	KMT5A	387893	-1.88046	-1.35041	8.62386	0.00628014	0.218024	down
NR_046598.1	chr3	192232811	192234362	1552	+	11347	NR_046598.1	FGF12-AS3	100873988	-1.77631	-1.38271	8.61617	0.00630074	0.218337	down
NM_024310.4	chr19	30156327	30166384	10058	+	49201	NM_024310.4	PLEKHF1	79156	0.62984	4.7817	8.34632	0.00632678	0.2185	up
NM_013348.3	chr19	48958964	48969367	10404	+	49838	NM_013348.3	KCNJ14	3770	-0.947312	4.33232	8.34567	0.00632862	0.2185	down
NM_022766.5	chr22	47080307	47134152	53846	-	55781	NM_022766.5	CERK	64781	0.33806	7.47843	8.32321	0.00639302	0.219487	up
NM_001201543.1	chr2	62051983	62081278	29296	-	8299	NM_001201543.1	FAM161A	84140	-1.73524	-1.3978	8.58196	0.00639326	0.219487	down
NM_000910.3	chr4	156129781	156138230	8450	+	13967	NM_000910.3	NPY2R	4887	-1.77427	2.41649	8.31954	0.00640361	0.219487	down
NM_014079.3	chr3	126061478	126076236	14759	-	12422	NM_014079.3	KLF15	28999	0.562998	7.18633	8.31947	0.00640379	0.219487	up
NM_004907.2	chr19	13261282	13265722	4441	+	48926	NM_004907.2	IER2	9592	-0.660551	6.72106	8.30504	0.00644561	0.220034	down
NR_026845.1	chr21	33765442	33766269	828	+	53929	NR_026845.1	URB1-AS1	84996	0.357421	4.46489	8.30274	0.00645229	0.220034	up
NM_001278718.1	chr19	35630538	35633959	3422	+	49300	NM_001278718.1	FXYD1	5348	0.869458	2.1983	8.29996	0.00646038	0.220034	up
NM_016558.3	chr20	34541539	34543281	1743	-	53439	NM_016558.3	SCAND1	51282	0.51239	2.46652	8.29306	0.00648055	0.220034	up
NR_135681.1	chr15	42184975	42191013	6039	+	40254	NR_135681.1	LOC105370792	105370792	0.668133	2.85169	8.2898	0.00649008	0.220034	up
NR_125406.1	chr3	46406151	46448550	42400	-	11771	NR_125406.1	LOC102724297	102724297	1.33102	0.572333	8.28949	0.00649099	0.220034	up
NM_001287429.1	chr7	48128737	48148330	19594	+	21291	NM_001287429.1	UPP1	7378	1.84258	-1.17219	8.54256	0.00650162	0.220034	up
NM_015669.4	chr5	140514788	140517709	2922	+	16170	NM_015669.4	PCDHB5	26167	-0.426647	4.59116	8.28195	0.00651312	0.220034	down
NM_019010.2	chr17	39032141	39041495	9355	-	46742	NM_019010.2	KRT20	54474	-1.79186	-1.34714	8.27105	0.00654523	0.220723	down
NM_001497.3	chr9	33110639	33167356	56718	-	26859	NM_001497.3	B4GALT1	2683	0.684397	5.4589	8.24843	0.00661244	0.221811	up
NR_132979.1	chr22	41469612	41469725	114	-	55686	NR_132979.1	SNORD140	106635682	1.77834	-1.38627	8.50192	0.00661548	0.221811	up
NM_001278162.1	chr11	33279877	33378569	98693	+	31092	NM_001278162.1	HIPK3	10114	1.29938	0.0134414	8.24458	0.00662396	0.221811	up
NM_001486.3	chr2	27719706	27746551	26846	+	5963	NM_001486.3	GCKR	2646	1.16542	-0.301971	8.23304	0.0066586	0.221811	up
NM_005746.2	chr7	105888731	105925638	36908	-	23157	NM_005746.2	NAMPT	10135	0.630148	6.78366	8.23281	0.0066593	0.221811	up
NM_001003841.2	chr5	1201710	1225232	23523	+	15226	NM_001003841.2	SLC6A19	340024	2.21648	-1.17361	8.48451	0.00666491	0.221811	up
NM_004823.1	chr19	38810484	38819654	9171	+	49502	NM_004823.1	KCNK6	9424	0.844082	2.45423	8.229	0.00667079	0.221811	up
NR_120638.1	chr10	14116283	14129880	13598	+	27989	NR_120638.1	LOC101928453	101928453	-1.78639	-1.28226	8.22599	0.00667988	0.221811	down
NR_108074.1	chr10	6816265	6821142	4878	-	29307	NR_108074.1	LINC00706	100652997	1.05748	2.31486	8.22256	0.00669024	0.221811	up
NM_020882.2	chr20	61924538	61962285	37748	+	53000	NM_020882.2	COL20A1	57642	-0.92216	3.75297	8.22093	0.00669516	0.221811	down
NM_139245.3	chr3	160473992	160796695	322704	+	11130	NM_139245.3	PPM1L	151742	-0.642573	2.02901	8.19436	0.00677612	0.224099	down
NM_144966.5	chr9	14734664	14910993	176330	-	26755	NM_144966.5	FREM1	158326	-0.994563	0.87241	8.18868	0.00679359	0.224284	down
NM_001336.3	chr20	57570242	57582309	12068	-	53741	NM_001336.3	CTSZ	1522	0.374166	7.65057	8.17446	0.00683746	0.225337	up
NM_002563.4	chr3	152552482	152559228	6747	+	11064	NM_002563.4	P2RY1	5028	-0.545602	7.57372	8.16445	0.00686851	0.225966	down
NM_001101404.1	chr15	78384927	78396393	11467	+	40760	NM_001101404.1	SH2D7	646892	0.816021	0.941587	8.15065	0.00691162	0.226965	up
NM_177454.3	chr2	187558789	187628514	69726	+	7162	NM_177454.3	FAM171B	165215	-0.541937	8.98492	8.14703	0.00692297	0.226965	down
NM_019110.4	chr6	28209483	28220074	10592	-	19595	NM_019110.4	ZKSCAN4	387032	-0.604216	0.97147	8.136	0.00695767	0.227707	down
NM_005468.2	chr11	64812295	64826009	13715	-	33258	NM_005468.2	NAALADL1	10004	0.818189	2.84644	8.12573	0.00699014	0.227996	up
NM_153647.3	chr14	92789537	92967825	178289	+	38801	NM_153647.3	SLC24A4	123041	1.51609	-0.909511	8.12556	0.0069907	0.227996	up
NM_014624.3	chr1	153507076	153508717	1642	-	4672	NM_014624.3	S100A6	6277	0.578099	8.1049	8.10143	0.00706764	0.230107	up
NM_001323292.1	chr5	63461670	63631758	170089	+	15514	NM_001323292.1	RNF180	285671	-0.454503	3.12425	8.09056	0.00710262	0.230429	down
NR_046570.1	chr3	183724126	183729207	5082	+	11226	NR_046570.1	ABCC5-AS1	100873982	1.90381	-1.14803	8.08985	0.00710491	0.230429	up
NM_001253845.1	chr22	50920153	50924866	4714	+	55221	NM_001253845.1	ADM2	79924	1.55281	-1.03258	8.08239	0.00712901	0.230429	up
NM_003863.3	chr9	130697374	130700763	3390	-	27567	NM_003863.3	DPM2	8818	0.318402	6.58781	8.08142	0.00713214	0.230429	up
NM_001303474.1	chr7	1094911	1098905	3995	+	20878	NM_001303474.1	GPR146	115330	1.35268	-0.244024	8.07942	0.00713863	0.230429	up
NM_183377.1	chr17	31340105	31620006	279902	-	46559	NM_183377.1	ASIC2	40	-1.15247	1.97035	8.06622	0.00718159	0.230885	down
NR_109980.1	chr7	116712126	116730835	18710	-	23215	NR_109980.1	ST7-AS2	93654	1.51428	-0.307204	8.06588	0.00718269	0.230885	up
NM_004466.5	chr13	92050873	93519490	1468618	+	37377	NM_004466.5	GPC5	2262	-0.428397	7.25213	8.06378	0.00718953	0.230885	down
NR_039602.1	chr8	94928250	94928347	98	-	25148	NR_039602.1	MIR378D2	100616169	2.01915	-1.27506	8.29147	0.00724064	0.231547	up
NR_110842.1	chr6	5665218	5695505	30288	-	19407	NR_110842.1	LOC101927950	101927950	2.2641	-0.799988	8.04745	0.00724312	0.231547	up
NM_000196.3	chr16	67465036	67471456	6421	+	42980	NM_000196.3	HSD11B2	3291	1.12395	3.22582	8.04573	0.00724876	0.231547	up
NM_002095.4	chr8	30436031	30515738	79708	-	24773	NM_002095.4	GTF2E2	2961	0.300798	5.62473	8.04255	0.00725925	0.231547	up
NM_016562.3	chrX	12885202	12908480	23279	+	55927	NM_016562.3	TLR7	51284	1.17111	3.60258	8.02699	0.00731083	0.232347	up
NM_000371.3	chr18	29171730	29178987	7258	+	47783	NM_000371.3	TTR	7276	-2.44129	5.87642	8.01849	0.00733916	0.232347	down
NM_000916.3	chr3	8792094	8811300	19207	-	11438	NM_000916.3	OXTR	5021	1.16497	5.87	8.01732	0.00734305	0.232347	up
NM_000558.4	chr16	226650	227521	872	+	42034	NM_000558.4	HBA1	3039	1.3595	6.68221	8.01678	0.00734488	0.232347	up
NR_105003.1	chr5	67485704	67494235	8532	+	15557	NR_105003.1	LOC102467655	NA	1.56575	-1.25825	8.01645	0.00734597	0.232347	up
NM_001276274.1	chr11	695591	705028	9438	+	30692	NM_001276274.1	TMEM80	283232	1.69906	-1.35731	9.13674	0.00739487	0.233279	up
NM_014963.2	chr19	1107633	1174282	66650	-	50464	NM_014963.2	SBNO2	22904	0.796735	1.21329	7.99809	0.00740763	0.233279	up
NM_022153.1	chr10	73507313	73533337	26025	-	29944	NM_022153.1	VSIR	64115	0.819146	8.8696	7.99663	0.00741256	0.233279	up
NR_027761.1	chrX	40690470	40692449	1980	-	57211	NR_027761.1	LOC100132831	100132831	0.951345	0.31038	7.99094	0.0074318	0.233314	up
NM_002448.3	chr4	4861392	4865663	4272	+	13151	NM_002448.3	MSX1	4487	1.09489	5.16965	7.98898	0.00743842	0.233314	up
NM_133261.2	chr19	3585569	3593539	7971	+	48601	NM_133261.2	GIPC3	126326	0.903611	3.24352	7.98017	0.00746836	0.233864	up
NM_001347864.1	chr10	134973958	134984124	10167	+	29216	NM_001347864.1	KNDC1	85442	-1.1103	0.329459	7.94982	0.0075724	0.236728	down
NM_001080505.1	chr4	42399856	42404504	4649	+	13382	NM_001080505.1	SHISA3	152573	0.913909	3.44515	7.94065	0.00760413	0.237327	up
NM_207352.3	chr4	187112674	187134617	21944	+	14118	NM_207352.3	CYP4V2	285440	-0.375873	7.01155	7.93421	0.00762652	0.237632	down
NM_080283.3	chr17	66970773	67057136	86364	-	47279	NM_080283.3	ABCA9	10350	-0.693289	4.55115	7.92658	0.00765313	0.237739	down
NM_001042588.1	chr15	75890424	75918719	28296	-	41731	NM_001042588.1	SNUPN	10073	-1.64935	-1.07954	7.91828	0.00768217	0.237739	down
NM_152280.4	chr1	155829260	155854990	25731	+	1909	NM_152280.4	SYT11	23208	-0.308361	11.2869	7.91718	0.00768602	0.237739	down
NM_002839.3	chr9	8314246	10612723	2298478	-	26740	NM_002839.3	PTPRD	5789	-0.600072	2.95661	7.91366	0.00769838	0.237739	down
NM_020781.3	chr7	148823508	148880134	56627	+	22161	NM_020781.3	ZNF398	57541	-1.40918	-0.450942	7.91033	0.00771012	0.237739	down
NM_024578.2	chr19	17337013	17340028	3016	+	49017	NM_024578.2	OCEL1	79629	0.351586	5.24272	7.90999	0.0077113	0.237739	up
NM_153048.3	chr6	111981535	112080334	98800	-	20464	NM_153048.3	FYN	2534	1.68431	-1.33641	8.14163	0.0077246	0.237739	up
NM_015311.2	chr2	220415450	220436268	20819	-	9546	NM_015311.2	OBSL1	23363	0.467567	3.81868	7.90445	0.00773085	0.237739	up
NM_003311.3	chr11	2949503	2950650	1148	-	32513	NM_003311.3	PHLDA2	7262	0.780919	1.80118	7.89544	0.00776271	0.237878	up
NM_003268.5	chr1	223282748	223316624	33877	-	5528	NM_003268.5	TLR5	7100	0.774989	2.94881	7.89187	0.00777538	0.237878	up
NM_001080504.2	chr2	238707388	238751451	44064	+	7679	NM_001080504.2	RBM44	375316	1.49797	-1.0502	7.89001	0.00778199	0.237878	up
NR_110647.1	chr9	71568004	71590757	22754	-	27053	NR_110647.1	LOC101927069	101927069	1.15341	0.898697	7.88624	0.00779543	0.237878	up
NM_004227.3	chr7	6201410	6312242	110833	-	22363	NM_004227.3	CYTH3	9265	-0.325518	7.75123	7.88539	0.00779844	0.237878	down
NM_006039.4	chr17	60704762	60770962	66201	+	45545	NM_006039.4	MRC2	9902	-0.460382	7.40467	7.87596	0.00783215	0.23852	down
NM_002263.3	chr6	33359313	33377701	18389	+	18355	NM_002263.3	KIFC1	3833	0.976391	1.12703	7.86724	0.00786342	0.238977	up
NM_014571.3	chr1	40089103	40105348	16246	-	3676	NM_014571.3	HEYL	26508	0.563818	6.54007	7.86472	0.0078725	0.238977	up
NM_005609.3	chr11	64513861	64527769	13909	-	33218	NM_005609.3	PYGM	5837	-0.725111	2.69606	7.85241	0.00791694	0.239939	down
NR_135280.1	chr13	111462023	111465431	3409	-	38077	NR_135280.1	LINC00567	283486	-1.24523	-0.594684	7.84749	0.00793477	0.240094	down
NM_003412.3	chr3	147127181	147134506	7326	+	11012	NM_003412.3	ZIC1	7545	-0.44302	6.83776	7.82423	0.00801971	0.241673	down
NM_002221.3	chr1	226819391	226926876	107486	-	5561	NM_002221.3	ITPKB	3707	0.601285	10.4465	7.82292	0.00802454	0.241673	up
NM_022059.3	chr17	4636824	4643223	6400	-	46078	NM_022059.3	CXCL16	58191	0.734885	5.2741	7.82268	0.00802542	0.241673	up
NM_001827.2	chr9	91926110	91931618	5509	+	26019	NM_001827.2	CKS2	1164	0.759516	2.24048	7.81719	0.00804563	0.241895	up
NM_152796.2	chr19	46801633	46841797	40165	+	49775	NM_152796.2	HIF3A	64344	0.850626	1.60225	7.80139	0.00810409	0.243069	up
NM_013248.2	chr20	23331373	23335408	4036	+	52435	NM_013248.2	NXT1	29107	0.372935	4.32033	7.79967	0.00811046	0.243069	up
NM_002686.4	chr17	37824706	37826728	2023	+	45042	NM_002686.4	PNMT	5409	0.660246	2.9136	7.77249	0.00821217	0.245726	up
NR_027064.2	chr19	5558178	5568045	9868	-	50582	NR_027064.2	TINCR	257000	-0.907914	4.1103	7.76336	0.00824661	0.246155	down
NM_001278355.1	chr12	69864129	69973573	109445	+	34964	NM_001278355.1	FRS2	10818	-1.65991	-1.36579	7.98933	0.00825259	0.246155	down
NM_024430.3	chr18	43563502	43652250	88749	-	48266	NM_024430.3	PSTPIP2	9050	1.00922	2.41019	7.75409	0.00828179	0.246635	up
NR_134635.1	chr6	137105185	137107192	2008	+	19075	NR_134635.1	LOC101928429	101928429	1.1656	0.456039	7.74297	0.00832418	0.247198	up
NM_000972.2	chr9	136215069	136218280	3212	+	26549	NM_000972.2	RPL7A	6130	0.304932	6.99947	7.74225	0.00832691	0.247198	up
NM_001080466.1	chr17	72352555	72357958	5404	-	47308	NM_001080466.1	BTBD17	388419	-0.659835	4.74748	7.73471	0.00835578	0.247352	down
NM_004004.5	chr13	20761602	20767114	5513	-	37549	NM_004004.5	GJB2	2706	-0.725829	3.20964	7.73405	0.00835834	0.247352	down
NM_003725.3	chr12	57157002	57181574	24573	+	34822	NM_003725.3	HSD17B6	8630	-0.567446	6.69647	7.72882	0.00837841	0.247557	down
NR_027337.1	chr1	120906034	120914842	8809	+	1573	NR_027337.1	HIST2H2BA	337875	1.43813	-1.22108	8.44783	0.00842727	0.248611	up
NM_133478.2	chr2	74443369	74570534	127166	-	8443	NM_133478.2	SLC4A5	57835	0.741049	2.03648	7.71135	0.00844597	0.248773	up
NM_006564.1	chr3	45984973	45989845	4873	+	10194	NM_006564.1	CXCR6	10663	-1.61224	-0.714322	7.6921	0.00852103	0.250593	down
NR_077225.1	chr12	96043031	96067775	24745	+	35095	NR_077225.1	PGAM1P5	100132594	-1.6785	-1.21053	7.68666	0.00854239	0.25062	down
NM_001301084.1	chr11	120256003	120360645	104643	+	32272	NM_001301084.1	ARHGEF12	23365	-1.60167	-1.17277	7.68509	0.00854854	0.25062	down
NM_022776.4	chr3	125247702	125314381	66680	-	12407	NM_022776.4	OSBPL11	114885	0.587955	6.91598	7.66287	0.00863641	0.252367	up
NM_032704.4	chr12	49658782	49667121	8340	+	34582	NM_032704.4	TUBA1C	84790	1.70257	0.68242	7.65996	0.00864798	0.252367	up
NR_045483.1	chr1	46899499	46911374	11876	+	905	NR_045483.1	FAAHP1	729041	1.02168	0.296039	7.6567	0.00866098	0.252367	up
NM_207422.2	chrX	71364034	71381600	17567	+	56390	NM_207422.2	FLJ44635	392490	0.307406	7.08933	7.65652	0.00866167	0.252367	up
NM_005439.2	chr12	6857158	6862082	4925	-	35661	NM_005439.2	MLF2	8079	1.56668	-1.33542	8.07281	0.00867765	0.25244	up
NM_152418.3	chr8	88882971	88886296	3326	-	25108	NM_152418.3	DCAF4L2	138009	1.55958	-1.37446	7.87002	0.0086935	0.25244	up
NR_110207.1	chr2	47441088	47572213	131126	-	8203	NR_110207.1	LOC101927043	NA	1.16121	-0.112775	7.64585	0.00870435	0.25244	up
NR_027283.1	chr17	66194801	66196443	1643	+	45604	NR_027283.1	LOC440461	NA	1.23006	-0.377056	7.64207	0.0087195	0.252491	up
NR_130941.1	chr2	176788620	176867567	78948	-	9168	NR_130941.1	LNPK	80856	-0.797319	0.116858	7.62531	0.0087871	0.254058	down
NR_073085.1	chr14	105943583	105946507	2925	+	39106	NR_073085.1	CRIP2	1397	1.13393	0.806441	7.61684	0.0088215	0.254427	up
NM_006098.4	chr5	180663928	180670906	6979	-	17842	NM_006098.4	RACK1	10399	0.248343	9.8062	7.61551	0.00882688	0.254427	up
NM_001308043.1	chr2	201980827	202004600	23774	+	7268	NM_001308043.1	CFLAR	8837	0.700928	2.54064	7.60878	0.00885431	0.254828	up
NM_153487.3	chr6	37600284	37665766	65483	-	19935	NM_153487.3	MDGA1	266727	-0.457661	6.04859	7.60261	0.00887956	0.255165	down
NM_002275.3	chr17	39669997	39675270	5274	-	46781	NM_002275.3	KRT15	3866	1.63775	-0.497855	7.57923	0.00897586	0.25754	up
NM_001320634.1	chr2	127805599	127839641	34043	-	8828	NM_001320634.1	BIN1	274	1.17482	-0.259081	7.56415	0.00903854	0.258945	up
NM_021105.2	chr3	146232967	146262628	29662	-	12589	NM_021105.2	PLSCR1	5359	0.927865	6.37077	7.5491	0.00910163	0.260356	up
NM_017914.3	chr19	1275520	1279243	3724	+	48538	NM_017914.3	C19orf24	55009	0.42257	6.16512	7.54426	0.009122	0.260361	up
NM_001136018.3	chr1	225997776	226033264	35489	+	2747	NM_001136018.3	EPHX1	2052	-1.53836	-1.41817	8.18135	0.00912943	0.260361	down
NM_003853.3	chr2	103035250	103069025	33776	+	6570	NM_003853.3	IL18RAP	8807	1.36024	-0.317659	7.5319	0.00917426	0.261245	up
NM_001080404.2	chr19	12154620	12163782	9163	-	50801	NM_001080404.2	ZNF878	729747	1.60036	-0.901036	7.52554	0.00920127	0.261292	up
NM_001319052.1	chr3	16258283	16271672	13390	+	9921	NM_001319052.1	GALNT15	117248	0.644214	3.26629	7.52499	0.00920363	0.261292	up
NM_002135.4	chr12	52445186	52453291	8106	+	34668	NM_002135.4	NR4A1	3164	-1.50184	-0.518607	7.50613	0.00928422	0.263183	down
NM_000537.3	chr1	204123944	204135465	11522	-	5368	NM_000537.3	REN	5972	-1.4727	-0.670737	7.50099	0.00930633	0.263414	down
NM_025261.2	chr6	31686425	31689511	3087	-	19733	NM_025261.2	LY6G6C	80740	1.42297	0.283141	7.49244	0.00934327	0.264063	up
NR_026655.1	chr12	54452038	54516018	63981	+	34732	NR_026655.1	FLJ12825	440101	-1.49404	-1.17832	7.48704	0.00936663	0.264327	down
NM_080817.4	chrX	41583408	41589388	5981	+	56085	NM_080817.4	GPR82	27197	1.29459	0.823021	7.48349	0.00938203	0.26436	up
NM_000229.1	chr16	67973787	67978015	4229	-	44132	NM_000229.1	LCAT	3931	0.729878	3.79979	7.47782	0.00940672	0.26436	up
NM_003256.3	chr3	12194568	12200851	6284	-	11505	NM_003256.3	TIMP4	7079	0.721244	4.77764	7.4751	0.00941858	0.26436	up
NM_139284.2	chr19	35615417	35626178	10762	-	51122	NM_139284.2	LGI4	163175	0.644811	8.16215	7.47388	0.0094239	0.26436	up
NM_138961.2	chr11	124623019	124632223	9205	-	33975	NM_138961.2	ESAM	90952	0.592513	7.64685	7.46749	0.00945182	0.264749	up
NR_132748.1	chr5	159895258	159914433	19176	+	16397	NR_132748.1	MIR3142HG	107075116	1.64653	-1.26335	7.45766	0.00949496	0.265563	up
NM_001321042.1	chr10	134494779	134596984	102206	+	29212	NM_001321042.1	INPP5A	3632	1.02767	2.57023	7.44836	0.00953597	0.266313	up
NM_001277378.1	chr19	14192444	14196607	4164	-	50879	NM_001277378.1	C19orf67	646457	1.50506	-1.12129	7.44519	0.00955002	0.266313	up
NM_001281513.1	chr2	26467616	26513333	45718	+	5904	NM_001281513.1	HADHB	3032	-1.6482	-1.38413	7.43666	0.00958785	0.266938	down
NM_015634.3	chr10	70748477	70776739	28263	+	28468	NM_015634.3	KIF1BP	26128	-0.300326	7.70053	7.43376	0.00960075	0.266938	down
NM_001198558.1	chr19	51628137	51639520	11384	+	49997	NM_001198558.1	SIGLEC9	27180	1.69978	-0.693679	7.42684	0.00963162	0.267282	up
NM_173627.4	chr17	78388967	78411886	22920	+	45870	NM_173627.4	ENDOV	284131	-1.39504	-1.05923	7.42463	0.0096415	0.267282	down
NM_001005176.2	chr2	231090445	231103793	13349	+	7549	NM_001005176.2	SP140	11262	1.69582	-1.13617	7.42002	0.00966213	0.267461	up
NM_017947.2	chr18	33767480	33848685	81206	+	47838	NM_017947.2	MOCOS	55034	0.846027	0.909474	7.41512	0.00968415	0.267677	up
NR_038434.1	chr2	13106908	13147138	40231	-	7881	NR_038434.1	LOC100506474	100506474	-0.916082	0.491893	7.41137	0.00970099	0.26775	down
NM_002224.3	chr6	33589156	33664351	75196	+	18364	NM_002224.3	ITPR3	3710	0.577883	5.73431	7.38627	0.00981476	0.270459	up
NM_001271779.1	chr3	63996225	64009282	13058	-	12100	NM_001271779.1	PSMD6	9861	1.40951	-0.68693	7.3834	0.00982783	0.270459	up
NM_000603.4	chr7	150688144	150711687	23544	+	22199	NM_000603.4	NOS3	4846	0.773276	4.67996	7.37252	0.00987766	0.271434	up
NR_003369.2	chr16	29086163	29128039	41877	+	42574	NR_003369.2	RRN3P2	653390	-1.28098	-0.398704	7.36565	0.00990924	0.271905	down
NR_073178.1	chr17	76257430	76274573	17144	-	47455	NR_073178.1	LINC01993	100996291	1.56271	-1.35161	7.56673	0.00993351	0.272175	up
NM_001739.1	chr16	87921625	87970112	48488	-	44339	NM_001739.1	CA5A	763	1.03314	0.185784	7.34952	0.00998383	0.272598	up
NM_000642.2	chr1	100315640	100389579	73940	+	1341	NM_000642.2	AGL	178	-0.812396	0.184684	7.34835	0.00998927	0.272598	down
NM_024081.5	chr11	32851481	32879669	28189	+	31081	NM_024081.5	PRRG4	79056	0.637287	3.7378	7.34769	0.00999232	0.272598	up
NM_015910.5	chr2	63348518	63815867	467350	-	8310	NM_015910.5	WDPCP	51057	-0.502246	1.25557	7.34231	0.0100173	0.272886	down
NM_002175.2	chr9	21165636	21166659	1024	-	26792	NM_002175.2	IFNA21	3452	-1.62363	-1.26189	7.33184	0.0100663	0.273823	down
NR_026955.1	chr13	44596471	44604599	8129	+	37185	NR_026955.1	LINC00284	121838	1.25876	0.34996	7.3226	0.0101097	0.274287	up
NM_001463.3	chr2	183698002	183731498	33497	-	9239	NM_001463.3	FRZB	2487	-0.519722	6.56299	7.32201	0.0101124	0.274287	down
NR_026676.1	chr7	23530007	23531047	1041	+	21075	NR_026676.1	RPS2P32	256355	0.469198	2.01026	7.30806	0.0101784	0.275563	up
NM_006922.3	chr2	165944030	166060577	116548	-	9076	NM_006922.3	SCN3A	6328	1.59247	-1.32771	7.30587	0.0101887	0.275563	up
NM_022159.3	chr1	79355449	79472495	117047	-	4100	NM_022159.3	ADGRL4	64123	0.943891	6.41213	7.29761	0.010228	0.276006	up
NM_006877.3	chr6	16238811	16295780	56970	+	17969	NM_006877.3	GMPR	2766	0.95234	6.1881	7.29511	0.0102399	0.276006	up
NM_001003927.2	chr17	29643428	29648767	5340	-	46548	NM_001003927.2	EVI2A	2123	1.61278	-1.2274	7.29321	0.010249	0.276006	up
NM_003823.3	chr20	62328004	62330051	2048	+	53013	NM_003823.3	TNFRSF6B	8771	1.49144	-0.572615	7.28645	0.0102813	0.276394	up
NM_001167608.1	chr2	227700671	227863926	163256	+	7525	NM_001167608.1	RHBDD1	84236	-0.74056	0.430352	7.28407	0.0102927	0.276394	down
NM_001144990.1	chr4	37246690	37451087	204398	+	13303	NM_001144990.1	NWD2	57495	-1.72711	1.15067	7.27702	0.0103266	0.276701	down
NR_003207.1	chr14	101438440	101438513	74	+	38950	NR_003207.1	SNORD114-14	767592	1.67966	-1.38991	7.47386	0.0103506	0.276701	up
NM_001083604.1	chr9	98205264	98270322	65059	-	27243	NM_001083604.1	PTCH1	5727	-1.69804	-1.36255	7.47275	0.0103557	0.276701	down
NM_001029858.3	chr6	118228689	118638839	410151	+	18941	NM_001029858.3	SLC35F1	222553	-0.475011	7.50113	7.26721	0.010374	0.276701	down
NM_001322865.1	chr1	24742240	24781314	39075	+	416	NM_001322865.1	NIPAL3	57185	1.29233	-0.846946	7.26647	0.0103776	0.276701	up
NM_002616.2	chr17	8043788	8055753	11966	-	46229	NM_002616.2	PER1	5187	0.383695	7.60516	7.2578	0.0104196	0.277101	up
NM_000634.2	chr2	219027568	219031716	4149	-	9476	NM_000634.2	CXCR1	3577	1.00623	1.03308	7.25056	0.0104549	0.277101	up
NM_020981.3	chr2	168675182	168727366	52185	+	6984	NM_020981.3	B3GALT1	8708	-0.72764	3.66082	7.24959	0.0104596	0.277101	down
NM_001003938.3	chr16	215973	216767	795	+	42032	NM_001003938.3	HBM	3042	1.15855	0.665931	7.2489	0.010463	0.277101	up
NM_001766.3	chr1	158149737	158156217	6481	+	1975	NM_001766.3	CD1D	912	1.55446	-1.34444	7.24827	0.0104661	0.277101	up
NM_001159522.1	chr7	63505821	63538927	33107	+	21355	NM_001159522.1	ZNF727	442319	-0.766667	1.92303	7.24472	0.0104834	0.277171	down
NM_178229.4	chr1	156495197	156542396	47200	-	4880	NM_178229.4	IQGAP3	128239	1.47343	0.159763	7.23821	0.0105153	0.277625	up
NM_001242811.1	chr6	90272037	90343553	71517	+	18801	NM_001242811.1	ANKRD6	22881	-1.36684	-0.616241	7.22812	0.010565	0.278546	down
NM_001137601.2	chr14	105267518	105271049	3532	+	39084	NM_001137601.2	ZBTB42	100128927	0.642759	3.25101	7.21879	0.0106111	0.2791	up
NM_145176.2	chr6	134308719	134373789	65071	-	20575	NM_145176.2	SLC2A12	154091	-0.337343	6.45687	7.20895	0.01066	0.2791	down
NR_026964.3	chr9	139216998	139221779	4782	-	27734	NR_026964.3	DKFZP434A062	26102	0.860255	1.18078	7.20466	0.0106814	0.2791	up
NM_001297652.1	chr6	30850390	30867933	17544	+	18199	NM_001297652.1	DDR1	780	1.6251	-1.1737	7.20392	0.0106851	0.2791	up
NM_001184801.1	chr6	42531760	42588089	56330	+	18485	NM_001184801.1	UBR2	23304	-1.7214	-1.19778	7.39419	0.0107236	0.2791	down
NR_051987.1	chr4	139230865	139345498	114634	+	13871	NR_051987.1	LINC00499	100874047	0.910367	1.5991	7.19274	0.010741	0.2791	up
NM_000879.2	chr5	131877136	131879214	2079	-	17293	NM_000879.2	IL5	3567	-1.50879	-1.30456	7.43668	0.0107514	0.2791	down
NM_004843.3	chr19	14142552	14163731	21180	+	48948	NM_004843.3	IL27RA	9466	0.632569	4.15807	7.18747	0.0107676	0.2791	up
NM_000808.3	chrX	151335634	151619831	284198	-	57976	NM_000808.3	GABRA3	2556	-0.980104	4.28888	7.18711	0.0107694	0.2791	down
NR_120534.1	chr11	1917989	1929589	11601	+	30748	NR_120534.1	LINC01150	101927624	1.24588	-0.17107	7.18693	0.0107703	0.2791	up
NM_001139459.1	chr1	246729639	246811544	81906	+	2941	NM_001139459.1	CNST	163882	-1.47873	-1.38854	7.48813	0.0107711	0.2791	down
NR_125804.1	chr6	1605766	1607593	1828	+	17861	NR_125804.1	FOXCUT	101927703	1.25159	0.965881	7.18587	0.0107756	0.2791	up
NR_110651.1	chrX	84465712	84474295	8584	+	56440	NR_110651.1	LOC101928128	101928128	-1.5477	-1.12452	7.1847	0.0107816	0.2791	down
NR_038256.1	chr12	127221553	127230802	9250	+	35480	NR_038256.1	LINC00943	100507206	-1.27159	1.00193	7.18003	0.0108051	0.2791	down
NR_126400.1	chr11	2012326	2014699	2374	+	30756	NR_126400.1	LINC01219	104355220	-1.54779	-1.37011	7.37555	0.0108129	0.2791	down
NM_032023.3	chr10	45455219	45490172	34954	+	28292	NM_032023.3	RASSF4	83937	0.545922	7.44682	7.17651	0.0108229	0.2791	up
NR_131238.1	chrX	119170201	119280761	110561	+	56700	NR_131238.1	RHOXF1-AS1	101928969	1.56118	-0.240846	7.15075	0.0109542	0.281833	up
NR_126337.1	chr2	99377526	99388361	10836	-	8633	NR_126337.1	LOC101927070	NA	0.883957	0.438321	7.14874	0.0109645	0.281833	up
NM_001167820.1	chr20	36145819	36156333	10515	-	53469	NM_001167820.1	BLCAP	10904	-1.45704	-0.947197	7.14342	0.0109919	0.281833	down
NM_001005619.1	chr17	73720776	73753899	33124	+	45744	NM_001005619.1	ITGB4	3691	1.1922	0.554927	7.14294	0.0109943	0.281833	up
NM_032824.2	chr2	112812800	112876895	64096	+	6656	NM_032824.2	TMEM87B	84910	1.56833	-1.2157	7.14114	0.0110036	0.281833	up
NM_000290.3	chr7	44102326	44105186	2861	-	22605	NM_000290.3	PGAM2	5224	0.535262	4.85117	7.12564	0.0110838	0.283288	up
NM_006694.3	chr1	153946745	153950451	3707	-	4701	NM_006694.3	JTB	10899	0.314902	8.43229	7.12435	0.0110905	0.283288	up
NM_016944.1	chr7	141478289	141479188	900	+	22091	NM_016944.1	TAS2R4	50832	-0.93861	0.903147	7.1206	0.01111	0.283403	down
NM_001320929.1	chr15	59930261	59949453	19193	-	41430	NM_001320929.1	GTF2A2	2958	1.58458	-1.27505	7.11115	0.0111593	0.284276	up
NM_002568.3	chr8	101715144	101734315	19172	-	25209	NM_002568.3	PABPC1	26986	0.396068	8.58306	7.10044	0.0112155	0.284959	up
NM_001010906.1	chr8	27879481	27941388	61908	-	24753	NM_001010906.1	NUGGC	389643	1.65681	-1.35377	7.29341	0.0112164	0.284959	up
NM_001130415.1	chr12	12878851	12944400	65550	+	34350	NM_001130415.1	APOLD1	81575	1.32061	0.381129	7.0909	0.0112658	0.28537	up
NR_134505.1	chr10	85926984	85931832	4849	-	30072	NR_134505.1	HOST2	NA	1.9382	-0.238	7.08797	0.0112813	0.28537	up
NM_001010887.2	chr9	19408925	19452500	43576	+	25691	NM_001010887.2	ACER2	340485	0.818628	3.60368	7.08578	0.0112929	0.28537	up
NM_024756.2	chr10	88695297	88717425	22129	-	30083	NM_024756.2	MMRN2	79812	0.743042	6.94281	7.08575	0.0112931	0.28537	up
NR_145449.1	chrX	30852740	30857190	4451	+	56044	NR_145449.1	TAB3-AS1	727682	1.37778	-0.850685	7.07923	0.0113277	0.285861	up
NM_001145777.1	chr6	35548334	35656719	108386	-	19893	NM_001145777.1	FKBP5	2289	1.37124	0.426891	7.07552	0.0113474	0.285976	up
NM_001304943.1	chr17	42472645	42514219	41575	-	46916	NM_001304943.1	GPATCH8	23131	-1.98659	-1.22171	7.26026	0.0113838	0.286511	down
NM_001301828.1	chr10	135168658	135171529	2872	-	30650	NM_001301828.1	FUOM	282969	1.45922	-1.08735	7.0583	0.0114395	0.28744	up
NR_036444.1	chr16	86521269	86542466	21198	-	44316	NR_036444.1	FENDRR	400550	0.976915	2.79842	7.05612	0.0114513	0.28744	up
NM_017766.4	chr1	10707263	10856733	149471	-	3191	NM_017766.4	CASZ1	54897	1.25115	-0.547753	7.04653	0.011503	0.288355	up
NM_001080391.1	chr2	231280871	231410317	129447	+	7561	NM_001080391.1	SP100	6672	0.932806	3.78934	7.03419	0.0115699	0.289647	up
NM_001195442.1	chr3	46653925	46668033	14109	+	10209	NM_001195442.1	LOC100132146	NA	-1.64446	-1.04996	7.02838	0.0116015	0.290054	down
NM_002546.3	chr8	119935796	119964383	28588	-	25299	NM_002546.3	TNFRSF11B	4982	1.31953	2.80543	7.01792	0.0116587	0.290949	up
NM_000710.3	chr14	96722547	96731100	8554	+	38861	NM_000710.3	BDKRB1	623	1.30979	-0.715392	7.0162	0.0116682	0.290949	up
NM_000397.3	chrX	37639270	37672714	33445	+	56058	NM_000397.3	CYBB	1536	1.1874	5.95858	7.00063	0.0117539	0.292273	up
NR_121602.1	chr9	23500689	23672397	171709	-	26814	NR_121602.1	LOC101929563	101929563	1.2503	-0.75127	6.99996	0.0117577	0.292273	up
NM_001166286.1	chr15	93586636	93616389	29754	-	41952	NM_001166286.1	RGMA	56963	1.73295	-1.1312	6.99712	0.0117734	0.292273	up
NM_032439.3	chr10	60936348	61007534	71187	+	28397	NM_032439.3	PHYHIPL	84457	-0.483797	5.02932	6.99475	0.0117865	0.292273	down
NM_170672.2	chr2	33661416	33789798	128383	+	6050	NM_170672.2	RASGRP3	25780	1.29787	-0.310099	6.99118	0.0118064	0.292273	up
NM_013332.3	chr7	128095884	128098472	2589	+	21939	NM_013332.3	HILPDA	29923	1.35705	-0.145207	6.9893	0.0118168	0.292273	up
NM_001287511.1	chr1	42922165	42939052	16888	+	771	NM_001287511.1	PPCS	79717	1.30277	-0.601401	6.98696	0.0118298	0.292273	up
NM_000395.2	chr22	37309675	37336481	26807	+	54983	NM_000395.2	CSF2RB	1439	0.988604	2.94526	6.98326	0.0118505	0.292399	up
NM_002241.4	chr1	160007257	160040051	32795	-	4959	NM_002241.4	KCNJ10	3766	-0.395476	10.1727	6.97487	0.0118974	0.293039	down
NM_012137.3	chr1	85784168	85930889	146722	-	4128	NM_012137.3	DDAH1	23576	-0.456466	4.84606	6.97307	0.0119075	0.293039	down
NM_000206.2	chrX	70327254	70331481	4228	-	57465	NM_000206.2	IL2RG	3561	1.00203	2.49278	6.96488	0.0119535	0.293789	up
NM_173199.2	chr9	102584137	102596341	12205	+	26122	NM_173199.2	NR4A3	8013	-1.75914	-1.1542	6.9573	0.0119963	0.294457	down
NR_040031.1	chr18	13419498	13427533	8036	-	48136	NR_040031.1	LDLRAD4-AS1	100288122	0.908665	2.34871	6.95381	0.012016	0.294557	up
NM_001033578.2	chr8	67624653	67774257	149605	+	24097	NM_001033578.2	SGK3	23678	0.494839	1.82543	6.94997	0.0120378	0.294707	up
NM_001040153.3	chr13	78273016	78338377	65362	+	37342	NM_001040153.3	SLAIN1	122060	1.23392	-0.653812	6.94622	0.0120591	0.294847	up
NM_003613.3	chr15	65488337	65503840	15504	-	41497	NM_003613.3	CILP	8483	-0.90589	0.379357	6.94336	0.0120754	0.294862	down
NR_134618.1	chr6	17707274	17711258	3985	+	17978	NR_134618.1	LOC105374952	105374952	1.5786	-1.37387	7.12475	0.012097	0.295007	up
NM_054014.3	chr20	1352356	1373816	21461	-	53084	NM_054014.3	FKBP1A	2280	0.638291	1.30608	6.9335	0.0121317	0.295471	up
NM_001253800.1	chr19	54042042	54083523	41482	+	50085	NM_001253800.1	ZNF331	55422	-1.51227	-1.32556	6.99099	0.0122434	0.297594	down
NM_003038.4	chr2	65216495	65250999	34505	+	6235	NM_003038.4	SLC1A4	6509	-0.596589	6.15896	6.91286	0.0122504	0.297594	down
NR_002443.1	chr15	66793590	66793656	67	-	41533	NR_002443.1	SNORD18C	595100	-1.73327	-1.2314	6.90915	0.0122719	0.297733	down
NM_001297559.1	chr4	8271492	8298262	26771	+	13189	NM_001297559.1	HTRA3	94031	1.14252	-0.456888	6.90395	0.0123021	0.298081	up
NR_015407.1	chr1	238643684	238649317	5634	-	5671	NR_015407.1	LINC01139	339535	-0.928162	0.892206	6.89887	0.0123316	0.298413	down
NM_032818.2	chr9	35659341	35665278	5938	-	26945	NM_032818.2	ARHGEF39	84904	0.879849	-0.233714	6.89259	0.0123683	0.298916	up
NM_001011553.3	chr7	35840596	35946715	106120	+	21209	NM_001011553.3	2007-09-01	NA	-1.66246	-1.11853	6.88864	0.0123913	0.29909	down
NM_152468.4	chr17	76126859	76139049	12191	+	45818	NM_152468.4	TMC8	147138	0.665829	3.50142	6.87932	0.0124461	0.299565	up
NM_001172431.1	chr11	10471868	10529126	57259	+	30923	NM_001172431.1	AMPD3	272	-1.10274	-0.591277	6.87748	0.0124569	0.299565	down
NM_016943.2	chr7	141463897	141464997	1101	+	22090	NM_016943.2	TAS2R3	50831	-1.13487	-0.0852009	6.87659	0.0124621	0.299565	down
NM_006730.3	chrX	153629577	153637614	8038	-	58037	NM_006730.3	DNASE1L1	1774	1.21358	-0.440727	6.87447	0.0124746	0.299565	up
NM_004556.2	chr6	44225903	44233525	7623	-	20065	NM_004556.2	NFKBIE	4794	0.376196	4.62582	6.86706	0.0125184	0.300234	up
NM_004994.2	chr20	44637547	44645200	7654	+	52785	NM_004994.2	MMP9	4318	0.752749	2.50015	6.86024	0.0125589	0.300456	up
NR_133677.1	chr21	44560633	44561202	570	-	54502	NR_133677.1	FRGCA	106481742	1.75489	-1.16064	6.86013	0.0125595	0.300456	up
NM_001007527.1	chr5	36103414	36152015	48602	-	16764	NM_001007527.1	LMBRD2	92255	-0.502473	5.72378	6.8566	0.0125805	0.300577	down
NM_032857.4	chr15	63413999	63434264	20266	+	40523	NM_032857.4	LACTB	114294	0.402764	3.84931	6.85316	0.012601	0.300685	up
NM_207015.2	chr3	174577111	175523428	946318	+	11178	NM_207015.2	NAALADL2	254827	-0.487327	3.01586	6.8472	0.0126365	0.301152	down
NM_002312.3	chr13	108859790	108867130	7341	-	38065	NM_002312.3	LIG4	3981	-0.894639	-0.0692451	6.83803	0.0126915	0.30192	down
NR_103731.1	chr2	173420101	173490351	70251	+	7055	NR_103731.1	PDK1	5163	1.31754	-0.816059	6.83648	0.0127008	0.30192	up
NM_001159293.1	chr19	20720798	20748626	27829	-	51044	NM_001159293.1	ZNF737	100129842	-0.423729	5.32553	6.83253	0.0127246	0.302105	down
NM_004807.2	chr2	129023054	129076171	53118	-	8870	NM_004807.2	HS6ST1	9394	0.360106	6.52425	6.82215	0.0127873	0.302867	up
NM_012102.3	chr1	8412464	8877699	465236	-	3158	NM_012102.3	RERE	473	1.49153	-1.23938	6.82189	0.0127888	0.302867	up
NM_001008224.1	chr15	70946893	70994620	47728	-	41574	NM_001008224.1	UACA	55075	-1.51798	-0.968054	6.81392	0.0128372	0.303632	down
NM_001199080.2	chr1	53527724	53551174	23451	+	993	NM_001199080.2	PODN	127435	1.62096	-1.10579	6.80839	0.0128709	0.304046	up
NM_021137.4	chr17	26662548	26674035	11488	+	44845	NM_021137.4	TNFAIP1	7126	0.257857	7.41036	6.80292	0.0129043	0.304128	up
NR_133637.1	chr11	77532160	77611831	79672	+	31937	NR_133637.1	AAMDC	28971	0.953892	-0.348802	6.80254	0.0129066	0.304128	up
NR_024042.1	chr11	76391210	76432833	41624	-	33495	NR_024042.1	GUCY2EP	390226	-1.5048	-1.4182	7.32755	0.0129623	0.305059	down
NR_134853.1	chr3	58592807	58620167	27361	+	10439	NR_134853.1	FAM3D-AS1	105377108	-1.31798	-0.924953	6.77003	0.0131071	0.307848	down
NM_198456.2	chrX	54200222	54209714	9493	-	57371	NM_198456.2	FAM120C	54954	-0.698631	0.147477	6.76534	0.0131363	0.307848	down
NM_001128208.1	chr8	29952922	29995222	42301	+	23861	NM_001128208.1	LEPROTL1	23484	0.862102	0.901533	6.76392	0.0131452	0.307848	up
NM_003817.3	chr8	24298509	24367078	68570	+	23795	NM_003817.3	ADAM7	8756	1.54219	-1.41286	6.9811	0.0131602	0.307848	up
NM_031286.3	chr1	26606213	26608013	1801	+	485	NM_031286.3	SH3BGRL3	83442	0.289715	8.78277	6.76115	0.0131625	0.307848	up
NR_003232.1	chr14	101402828	101402901	74	+	38930	NR_003232.1	SNORD113-4	767564	1.28891	-0.667033	6.74992	0.0132328	0.30911	up
NM_031419.3	chr3	101568358	101579869	11512	+	10630	NM_031419.3	NFKBIZ	64332	1.33437	-0.77553	6.74713	0.0132504	0.309138	up
NM_001143819.2	chr12	113659243	113736390	77148	+	35325	NM_001143819.2	TPCN1	53373	-1.03785	-0.108803	6.74383	0.0132712	0.309239	down
NR_038342.1	chr4	79892902	80229953	337052	+	13587	NR_038342.1	LINC01088	100505875	1.33807	3.46022	6.73104	0.013352	0.310358	up
NM_000898.4	chrX	43625857	43741721	115865	-	57216	NM_000898.4	MAOB	4129	0.521853	9.29769	6.73103	0.0133521	0.310358	up
NM_001195304.1	chr10	112658488	112679124	20637	-	30416	NM_001195304.1	BBIP1	92482	0.676683	0.651476	6.71692	0.0134419	0.312061	up
NM_145057.3	chr19	54976209	54984437	8229	-	52002	NM_145057.3	CDC42EP5	148170	0.71272	3.19154	6.70439	0.0135222	0.313465	up
NR_038247.1	chr19	38039851	38078249	38399	+	49489	NR_038247.1	ZNF571-AS1	100507433	-1.6974	-1.26396	6.70231	0.0135356	0.313465	down
NM_052836.3	chr10	73156691	73407219	250529	+	28520	NM_052836.3	CDH23	64072	1.34431	-0.995315	6.69484	0.0135838	0.314194	up
NM_003404.4	chr20	43514240	43537173	22934	+	52722	NM_003404.4	YWHAB	7529	1.39233	-0.928978	6.68408	0.0136535	0.31542	up
NM_032272.4	chr8	145159305	145162515	3211	+	24467	NM_032272.4	MAF1	84232	0.306347	8.1433	6.67488	0.0137135	0.316417	up
NM_018460.3	chr2	143886899	144525921	639023	+	6887	NM_018460.3	ARHGAP15	55843	0.985	2.24034	6.66617	0.0137704	0.317343	up
NM_022091.4	chr6	101304179	101329248	25070	-	20383	NM_022091.4	ASCC3	10973	-0.512991	2.15992	6.63749	0.0139599	0.321316	down
NR_033998.1	chr1	95393584	95428826	35243	+	1306	NR_033998.1	LOC729970	729970	0.564981	4.50084	6.63479	0.0139779	0.321339	up
NM_002511.3	chr6	142395621	142409936	14316	-	20643	NM_002511.3	NMBR	4829	-1.18418	-0.00988691	6.60691	0.014165	0.325243	down
NM_001317805.1	chr8	71485453	71519926	34474	-	24987	NM_001317805.1	TRAM1	23471	1.04737	-0.445105	6.60382	0.0141859	0.325326	up
NM_003824.3	chr11	70049269	70053508	4240	+	31787	NM_003824.3	FADD	8772	0.244661	5.5874	6.59694	0.0142326	0.326	up
NM_005434.4	chr2	110841447	110874143	32697	-	8742	NM_005434.4	MALL	7851	1.28288	0.102097	6.5827	0.0143297	0.327646	up
NM_001289172.1	chr19	44716681	44741421	24741	+	49696	NM_001289172.1	ZNF227	7770	1.50563	-1.39219	6.74934	0.0143392	0.327646	up
NM_130386.2	chr18	319355	500729	181375	-	48054	NM_130386.2	COLEC12	81035	-0.689668	7.21504	6.57838	0.0143593	0.327707	down
NM_020755.3	chr6	122764493	122793026	28534	-	20506	NM_020755.3	SERINC1	57515	-0.288262	11.2575	6.56249	0.0144687	0.329807	down
NM_024608.3	chr15	75639331	75647592	8262	+	40731	NM_024608.3	NEIL1	79661	0.435956	2.84812	6.55879	0.0144943	0.329991	up
NR_037662.1	chr6	119103871	119104583	713	+	18945	NR_037662.1	LOC100287632	NA	-1.10745	-0.436355	6.55397	0.0145278	0.330145	down
NM_001243281.1	chr3	105085557	105272015	186459	+	10636	NM_001243281.1	ALCAM	214	-1.0535	-0.229201	6.55177	0.0145431	0.330145	down
NM_000517.4	chr16	222846	223709	864	+	42033	NM_000517.4	HBA2	3040	1.16644	7.2664	6.55025	0.0145537	0.330145	up
NM_001146209.2	chr11	72287184	72380108	92925	-	33440	NM_001146209.2	PDE2A	5138	-1.58163	-1.33261	6.71029	0.0145972	0.330362	down
NM_030641.3	chr22	36044424	36064456	20033	+	54974	NM_030641.3	APOL6	80830	0.744078	6.59299	6.54091	0.0146188	0.330362	up
NM_001003678.2	chr11	46958240	47185932	227693	+	31261	NM_001003678.2	C11orf49	79096	-1.21831	-0.773784	6.53933	0.0146298	0.330362	down
NM_001077.3	chr4	69402902	69434245	31344	-	14507	NM_001077.3	UGT2B17	7367	1.69015	-1.28456	6.53768	0.0146414	0.330362	up
NR_038262.1	chr11	565657	568457	2801	-	32431	NR_038262.1	MIR210HG	100506211	0.651703	2.66725	6.53417	0.014666	0.330362	up
NM_001313932.1	chr1	19700669	19812135	111467	-	3298	NM_001313932.1	CAPZB	832	1.17082	-0.532142	6.53384	0.0146684	0.330362	up
NR_136528.1	chr19	57778561	57791702	13142	-	52098	NR_136528.1	LOC105372476	NA	-1.78683	-1.23429	6.69068	0.0147287	0.331325	down
NR_144394.1	chr17	29036626	29119848	83223	+	44898	NR_144394.1	SUZ12P1	440423	-0.907872	0.0294267	6.51645	0.0147909	0.331827	down
NR_028361.1	chr6	33551476	33556803	5328	+	18363	NR_028361.1	GGNBP1	449520	-1.27661	-0.687232	6.51511	0.0148004	0.331827	down
NM_005335.5	chr3	121350245	121379795	29551	-	12345	NM_005335.5	HCLS1	3059	1.4604	-0.788513	6.51463	0.0148038	0.331827	up
NM_052957.4	chrX	70797874	70833433	35560	+	56384	NM_052957.4	GCNA	93953	0.947131	2.08729	6.50557	0.0148682	0.332874	up
NM_002187.2	chr5	158741791	158757481	15691	-	17649	NM_002187.2	IL12B	3593	-1.37724	-1.08792	6.49677	0.0149311	0.332999	down
NM_024551.2	chr12	1800247	1897845	97599	+	34116	NM_024551.2	ADIPOR2	79602	0.436232	9.00384	6.49615	0.0149355	0.332999	up
NM_001136180.1	chr18	77724582	77730822	6241	+	48045	NM_001136180.1	HSBP1L1	440498	0.355628	5.05703	6.49518	0.0149424	0.332999	up
NM_001013620.3	chr12	38710557	38723528	12972	+	34503	NM_001013620.3	ALG10B	144245	-0.464392	2.85192	6.49392	0.0149514	0.332999	down
NM_002534.3	chr12	113344582	113355831	11250	+	35313	NM_002534.3	OAS1	4938	1.26771	0.700769	6.49066	0.0149748	0.332999	up
NM_002668.2	chrX	49028184	49031469	3286	+	56195	NM_002668.2	PLP2	5355	0.717888	4.27066	6.48553	0.0150117	0.332999	up
NM_001286672.1	chr4	57215126	57253674	38549	-	14460	NM_001286672.1	AASDH	132949	1.0848	-0.60226	6.48535	0.0150129	0.332999	up
NR_001447.2	chr16	56651373	56652730	1358	+	42805	NR_001447.2	MT1L	4500	0.898239	3.53815	6.48506	0.0150151	0.332999	up
NM_007006.2	chr16	56463048	56485261	22214	-	44019	NM_007006.2	NUDT21	11051	-0.305493	8.43236	6.47333	0.0150998	0.334087	down
NM_145251.3	chr14	53196883	53241707	44825	+	38432	NM_145251.3	STYX	6815	0.673706	0.804688	6.47179	0.0151109	0.334087	up
NM_001257268.1	chr14	104406763	104408645	1883	-	39938	NM_001257268.1	RD3L	647286	-1.4776	-1.23436	6.46841	0.0151354	0.334087	down
NR_046252.1	chr3	14984286	14989012	4727	-	11530	NR_046252.1	FGD5-AS1	100505641	-1.17375	-0.902134	6.46507	0.0151597	0.334087	down
NM_000129.3	chr6	6144311	6320924	176614	-	19411	NM_000129.3	F13A1	2162	1.1024	5.62306	6.46371	0.0151696	0.334087	up
NM_006018.2	chr12	123199303	123201439	2137	-	36934	NM_006018.2	HCAR3	8843	1.45491	-1.02828	6.46093	0.0151898	0.334087	up
NM_173500.3	chr15	43036536	43213007	176472	-	41241	NM_173500.3	TTBK2	146057	-0.290091	5.80451	6.45923	0.0152022	0.334087	down
NM_001242839.1	chr1	228327785	228336656	8872	+	2778	NM_001242839.1	GUK1	2987	-1.19122	-0.674845	6.45872	0.0152059	0.334087	down
NR_135229.1	chr3	101292938	101313309	20372	+	10619	NR_135229.1	PCNP	57092	0.349969	6.81778	6.45003	0.0152694	0.335092	up
NR_110646.1	chrX	79483988	79590817	106830	-	57543	NR_110646.1	CHMP1B2P	101060146	-1.40517	-1.21519	6.60804	0.015297	0.335307	down
NM_024829.5	chr12	14656597	14720791	64195	-	35825	NM_024829.5	PLBD1	79887	0.607747	3.78562	6.43784	0.015359	0.336108	up
NM_001013257.2	chr19	45312316	45324678	12363	+	49714	NM_001013257.2	BCAM	4059	0.878759	1.15007	6.43466	0.0153825	0.336108	up
NM_001321127.1	chr3	52444524	52457657	13134	+	10369	NM_001321127.1	PHF7	51533	-1.47269	-1.34602	6.5919	0.0154108	0.336108	down
NR_027654.1	chr15	66994674	67074338	79665	+	40579	NR_027654.1	SMAD6	4091	1.44754	-1.41775	6.5904	0.0154214	0.336108	up
NR_126348.1	chr8	123682624	123706345	23722	-	25312	NR_126348.1	LINC01151	104266958	-1.6408	-1.24265	6.58732	0.0154433	0.336108	down
NM_022173.2	chr2	70436576	70475779	39204	-	8360	NM_022173.2	TIA1	7072	-1.54145	-1.08204	6.42634	0.0154442	0.336108	down
NM_014715.3	chr11	128834955	128894088	59134	-	34042	NM_014715.3	ARHGAP32	9743	-1.14903	0.15822	6.42442	0.0154584	0.336108	down
NM_001282459.1	chr6	31895254	31902835	7582	+	18295	NM_001282459.1	C2	717	1.08519	-0.573553	6.40963	0.0155687	0.338116	up
NM_153634.2	chr12	39046002	39299420	253419	-	35956	NM_153634.2	CPNE8	144402	0.501887	5.70754	6.40521	0.0156017	0.338445	up
NM_006634.2	chr2	85811531	85820511	8981	+	6415	NM_006634.2	VAMP5	10791	0.570863	6.62801	6.39837	0.0156531	0.339051	up
NM_001286779.1	chr9	130025941	130155828	129888	+	26362	NM_001286779.1	GARNL3	84253	-1.54382	-1.40018	7.26263	0.0156796	0.339051	down
NR_033841.1	chr2	241894034	241906868	12835	-	9701	NR_033841.1	LOC200772	200772	1.4442	-0.432491	6.39321	0.0156921	0.339051	up
NM_006495.3	chr17	29630788	29641130	10343	-	46547	NM_006495.3	EVI2B	2124	0.776824	4.46444	6.39194	0.0157016	0.339051	up
NM_025225.2	chr22	44319619	44343448	23830	+	55127	NM_025225.2	PNPLA3	80339	-0.747652	0.889981	6.38727	0.0157369	0.339425	down
NM_003246.3	chr15	39873280	39891119	17840	+	40183	NM_003246.3	THBS1	7057	0.856542	5.82203	6.38228	0.0157748	0.339627	up
NM_019101.2	chr6	31623671	31625987	2317	+	18262	NM_019101.2	APOM	55937	-1.4102	-1.35841	6.54008	0.0157823	0.339627	down
NM_019107.3	chr19	4657557	4670415	12859	-	50571	NM_019107.3	MYDGF	56005	0.227636	6.68042	6.37155	0.0158564	0.340786	up
NM_001276501.1	chr6	32158543	32160692	2150	-	19783	NM_001276501.1	GPSM3	63940	1.00496	0.619504	6.36457	0.0159098	0.340786	up
NM_173852.3	chr1	155141884	155145804	3921	-	4757	NM_173852.3	KRTCAP2	200185	0.247136	6.2283	6.36342	0.0159186	0.340786	up
NM_003551.2	chr5	137450861	137475132	24272	-	17376	NM_003551.2	NME5	8382	-0.563871	5.26768	6.36194	0.01593	0.340786	down
NM_005480.3	chr12	49716971	49725514	8544	+	34586	NM_005480.3	TROAP	10024	1.61443	-0.676215	6.36157	0.0159328	0.340786	up
NM_017923.3	chr4	164445450	164534776	89327	-	15062	NM_017923.3	2001-03-01	55016	1.49576	-1.42989	6.67345	0.0159447	0.340786	up
NM_004148.3	chr9	95883771	95896570	12800	-	27216	NM_004148.3	NINJ1	4814	0.370831	7.19633	6.35735	0.0159652	0.340838	up
NM_001330354.1	chr2	99225011	99234978	9968	+	6520	NM_001330354.1	UNC50	25972	1.1588	-0.92244	6.35223	0.0160047	0.341294	up
NR_003320.1	chr15	25307479	25307575	97	+	40025	NR_003320.1	SNORD116-5	100033417	-1.42985	-1.34713	6.5001	0.0160757	0.34213	down
NM_001320151.1	chr12	113344582	113369995	25414	+	35316	NM_001320151.1	OAS1	4938	1.53943	-0.993468	6.34067	0.0160941	0.34213	up
NR_120482.1	chr12	362608	366465	3858	-	35560	NR_120482.1	LOC102723544	102723544	-1.72905	-1.25801	6.49647	0.0161026	0.34213	down
NM_001318093.1	chr5	115177303	115249778	72476	+	15860	NM_001318093.1	AP3S1	1176	-1.2947	-0.99999	6.33778	0.0161165	0.34213	down
NM_001291163.1	chr1	225997836	226033264	35429	+	2748	NM_001291163.1	EPHX1	2052	0.787583	3.42561	6.33368	0.0161483	0.342268	up
NM_005849.3	chr16	21652605	21663987	11383	-	43770	NM_005849.3	IGSF6	10261	0.977653	2.74299	6.33227	0.0161593	0.342268	up
NM_201566.2	chr17	6939394	6943440	4047	+	44543	NM_201566.2	SLC16A13	201232	0.63424	1.91776	6.32178	0.0162413	0.343066	up
NM_006763.2	chr1	203274664	203278730	4067	+	2466	NM_006763.2	BTG2	7832	-0.710718	7.68458	6.31835	0.0162681	0.343066	down
NR_015364.2	chr7	26526288	26535987	9700	+	21098	NR_015364.2	LOC441204	441204	-0.75801	2.95326	6.31722	0.016277	0.343066	down
NM_000969.3	chr1	93297594	93307481	9888	+	1282	NM_000969.3	RPL5	6125	0.289666	8.32418	6.31558	0.0162899	0.343066	up
NM_001145511.1	chr1	61542946	61928460	385515	+	1052	NM_001145511.1	NFIA	4774	-1.06256	0.134626	6.31441	0.0162991	0.343066	down
NR_130721.1	chr11	2861365	2882799	21435	-	32507	NR_130721.1	KCNQ1-AS1	338653	1.43923	-1.24597	6.31336	0.0163074	0.343066	up
NM_003841.4	chr8	22960327	22974950	14624	+	23775	NM_003841.4	TNFRSF10C	8794	0.848283	1.09724	6.31041	0.0163306	0.343066	up
NM_001985.2	chr19	51848409	51869672	21264	-	51821	NM_001985.2	ETFB	2109	0.838486	0.291	6.30889	0.0163425	0.343066	up
NM_005204.3	chr10	30722950	30750762	27813	+	28129	NM_005204.3	MAP3K8	1326	1.2508	-0.333647	6.30273	0.0163912	0.343582	up
NM_001008563.4	chr9	132597696	132644117	46422	+	26489	NM_001008563.4	USP20	10868	-1.44621	-1.09262	6.29969	0.0164152	0.343582	down
NR_021493.1	chr15	93111048	93115493	4446	-	41950	NR_021493.1	LINC00930	100144604	1.36404	-0.965286	6.29887	0.0164218	0.343582	up
NM_001085400.1	chr4	37612256	37687999	75744	-	14348	NM_001085400.1	RELL1	768211	0.797793	6.52466	6.29154	0.01648	0.34404	up
NR_002734.2	chr8	67679564	67680269	706	-	24966	NR_002734.2	PTTG3P	26255	1.17025	0.0519178	6.29151	0.0164802	0.34404	up
NM_001099221.1	chr5	134784558	134788089	3532	-	17354	NM_001099221.1	TIFAB	497189	1.69991	-1.18465	6.43548	0.0165624	0.345374	up
NM_022047.3	chr6	35265595	35289548	23954	+	18392	NM_022047.3	DEF6	50619	0.766143	3.25778	6.27454	0.0166159	0.346106	up
NR_125398.1	chr3	128208046	128222050	14005	+	10847	NR_125398.1	GATA2-AS1	101927167	0.863579	3.26281	6.27198	0.0166364	0.34615	up
NM_001704.2	chr6	69345632	70099403	753772	+	18690	NM_001704.2	ADGRB3	577	-0.383956	7.57552	6.26639	0.0166814	0.346175	down
NM_001286723.1	chr9	96213978	96294871	80894	+	26061	NM_001286723.1	FAM120A	23196	-1.13674	-0.660397	6.2639	0.0167015	0.346175	down
NM_001287421.1	chr6	28235137	28246001	10865	+	18110	NM_001287421.1	ZSCAN26	7741	-1.31494	-0.917519	6.26327	0.0167065	0.346175	down
NM_080671.3	chr2	223916648	223920355	3708	+	7521	NM_080671.3	KCNE4	23704	0.627992	5.06779	6.26272	0.016711	0.346175	up
NM_004759.4	chr1	206858365	206907630	49266	+	2535	NM_004759.4	MAPKAPK2	9261	1.02945	-0.197475	6.25737	0.0167543	0.346683	up
NR_110154.1	chr2	8811114	8821993	10880	-	7819	NR_110154.1	ID2-AS1	100506299	-0.637891	2.21574	6.25428	0.0167793	0.346683	down
NR_026965.1	chr13	103532449	103548383	15935	+	37429	NR_026965.1	METTL21EP	121952	-0.85689	0.627898	6.25288	0.0167907	0.346683	down
NR_109873.1	chr5	151056506	151067471	10966	+	16331	NR_109873.1	CTB-113P19.1	NA	1.36315	-0.575942	6.24975	0.0168161	0.346827	up
NM_004186.4	chr3	50192844	50226508	33665	+	10283	NM_004186.4	SEMA3F	6405	1.22708	-0.191241	6.24344	0.0168675	0.347209	up
NR_003942.1	chr1	173835773	173835853	81	-	5161	NR_003942.1	SNORD76	692196	-1.42333	-1.38875	6.3939	0.016884	0.347209	down
NM_024832.4	chr14	92980125	93155339	175215	+	38803	NM_024832.4	RIN3	79890	0.786922	0.529962	6.2407	0.0168899	0.347209	up
NM_025106.3	chr1	9352941	9429591	76651	+	155	NM_025106.3	SPSB1	80176	0.356673	6.13101	6.23811	0.0169111	0.347266	up
NR_003322.1	chr15	25312934	25313030	97	+	40027	NR_003322.1	SNORD116-7	100033419	1.41684	-1.40274	6.42295	0.0169458	0.3476	up
NR_135475.1	chr10	51371379	51747981	376603	+	28363	NR_135475.1	TIMM23B	100652748	-1.64512	-1.32502	6.37666	0.0170195	0.348637	down
NR_106996.1	chr16	24214437	24214552	116	+	42500	NR_106996.1	MIR1273H	102466247	-1.49113	-1.38906	6.3749	0.0170333	0.348637	down
NR_102756.1	chr15	32828960	32872810	43851	+	40140	NR_102756.1	LOC100996255	NA	-1.16112	-0.677519	6.22059	0.017055	0.348703	down
NM_003327.3	chr1	1146706	1149548	2843	-	3015	NM_003327.3	TNFRSF4	7293	0.961495	0.455966	6.2174	0.0170814	0.348863	up
NM_001754.4	chr21	36160098	36421595	261498	-	54383	NM_001754.4	RUNX1	861	1.62744	-1.27508	6.19723	0.017249	0.351556	up
NM_152542.4	chr4	89178761	89205983	27223	-	14695	NM_152542.4	PPM1K	152926	0.321361	8.85048	6.19547	0.0172638	0.351556	up
NM_003141.3	chr11	4406127	4414926	8800	-	32553	NM_003141.3	TRIM21	6737	0.685379	4.39785	6.19483	0.0172692	0.351556	up
NM_001570.3	chr3	10206563	10285427	78865	+	9845	NM_001570.3	IRAK2	3656	0.503533	3.59259	6.18904	0.0173177	0.351798	up
NM_004708.3	chr19	33072094	33078358	6265	+	49222	NM_004708.3	PDCD5	9141	0.307752	5.31322	6.18895	0.0173184	0.351798	up
NR_038955.1	chr9	132250939	132275965	25027	+	26471	NR_038955.1	LINC00963	100506190	0.426869	4.72962	6.17753	0.0174146	0.352427	up
NR_046174.2	chr18	39766633	40271391	504759	+	47857	NR_046174.2	LINC00907	284260	-1.72196	-1.15019	6.17727	0.0174168	0.352427	down
NM_000394.3	chr21	44589118	44592920	3803	+	54110	NM_000394.3	CRYAA	1409	0.91638	0.0967415	6.17672	0.0174214	0.352427	up
NM_024490.3	chr15	25923859	26108349	184491	-	41090	NM_024490.3	ATP10A	57194	0.598752	6.63946	6.1764	0.0174241	0.352427	up
NM_001193375.1	chr19	5891287	5904024	12738	-	50600	NM_001193375.1	NDUFA11	126328	0.826638	-0.0175571	6.17199	0.0174614	0.352803	up
NM_001267606.1	chr10	38117693	38146564	28872	-	29566	NM_001267606.1	ZNF248	57209	-1.35245	-0.980766	6.16628	0.0175098	0.353403	down
NM_001029874.1	chr12	27849428	27850566	1139	+	34459	NM_001029874.1	REP15	387849	0.963371	1.56159	6.16122	0.0175528	0.353891	up
NM_019105.6	chr6	32008932	32077151	68220	-	19760	NM_019105.6	TNXB	7148	0.64215	5.39103	6.15147	0.0176361	0.354991	up
NM_001080470.1	chr1	120162000	120190390	28391	-	4454	NM_001080470.1	ZNF697	90874	-0.45219	3.67689	6.15042	0.0176451	0.354991	down
NM_199424.2	chr16	69958886	69975644	16759	+	43056	NM_199424.2	WWP2	11060	-1.29215	-0.595232	6.14754	0.0176697	0.355109	down
NR_045628.1	chr2	167260083	167343481	83399	-	9086	NR_045628.1	SCN7A	6332	-1.71821	-1.0321	6.1429	0.0177096	0.355532	down
NM_005546.3	chr5	156607907	156682109	74203	+	16371	NM_005546.3	ITK	3702	-0.925642	0.665363	6.13228	0.0178012	0.356462	down
NR_111948.1	chr8	1244294	1250827	6534	-	24512	NR_111948.1	LOC286083	286083	-1.18845	-0.710166	6.13128	0.0178099	0.356462	down
NR_109791.1	chr9	92731698	92749768	18071	+	26027	NR_109791.1	LOC101927847	101927847	1.505	-1.31456	6.27855	0.0178127	0.356462	up
NR_001571.2	chr7	148638580	148638663	84	+	22157	NR_001571.2	RNY5	6090	1.71223	-1.30167	6.12844	0.0178345	0.356519	up
NR_027378.1	chr8	63890420	63897460	7041	+	24066	NR_027378.1	UG0898H09	NA	-0.563736	8.87622	6.12395	0.0178734	0.356919	down
NM_024786.2	chr5	795720	851101	55382	-	16625	NM_024786.2	ZDHHC11	79844	0.861965	2.68822	6.11814	0.0179238	0.357464	up
NM_015907.2	chr4	17578927	17609590	30664	+	13244	NM_015907.2	LAP3	51056	0.409553	7.35955	6.11645	0.0179386	0.357464	up
NR_047469.1	chr3	87138430	87147852	9423	+	10519	NR_047469.1	LINC00506	100846978	-0.84087	0.115832	6.10448	0.0180433	0.358825	down
NM_022146.4	chr10	72014713	72043450	28738	-	29915	NM_022146.4	NPFFR1	64106	-0.909133	0.906201	6.10429	0.018045	0.358825	down
NM_001098612.1	chr19	52145806	52150132	4327	-	51846	NM_001098612.1	SIGLEC14	100049587	1.28615	2.69825	6.10183	0.0180665	0.358875	up
NM_133373.4	chr17	43189008	43209900	20893	-	46943	NM_133373.4	PLCD3	113026	0.569244	8.39953	6.09584	0.0181193	0.359347	up
NM_001163424.1	chr2	241070242	241075747	5506	-	9682	NM_001163424.1	COPS9	150678	0.399997	6.54449	6.0948	0.0181284	0.359347	up
NM_002526.3	chr6	86159302	86205509	46208	+	18780	NM_002526.3	NT5E	4907	-0.921546	-0.109788	6.08995	0.0181713	0.359522	down
NR_046567.1	chr11	70477199	70481595	4397	+	31795	NR_046567.1	SHANK2-AS1	100874198	-1.2657	-0.938389	6.08948	0.0181754	0.359522	down
NM_001206559.1	chr13	28194880	28241559	46680	+	37092	NM_001206559.1	POLR1D	51082	0.470453	1.99656	6.0857	0.0182088	0.359676	up
NM_207408.1	chr5	125967414	125971974	4561	+	15927	NM_207408.1	TEX43	389320	1.48424	-1.20054	6.08429	0.0182214	0.359676	up
NM_001130698.1	chr4	122800183	122872909	72727	-	14912	NM_001130698.1	TRPC3	7222	-1.14435	0.546842	6.07983	0.0182609	0.359754	down
NR_120550.1	chr11	33796245	33797216	972	+	31094	NR_120550.1	FBXO3-AS1	NA	-1.53965	-1.40105	6.62428	0.0182635	0.359754	down
NM_001193521.1	chr12	113536624	113573559	36936	-	36801	NM_001193521.1	RASAL1	8437	-1.37405	-1.40296	6.21864	0.0183168	0.360174	down
NM_001102608.1	chr3	130279178	130395888	116711	+	10876	NM_001102608.1	COL6A6	131873	-0.942346	1.49598	6.07087	0.0183407	0.360174	down
NR_033875.1	chr2	20068615	20084808	16194	+	5866	NR_033875.1	LINC00954	400946	-1.48379	-1.03656	6.07072	0.0183421	0.360174	down
NM_001099733.1	chr18	904944	912173	7230	+	47617	NM_001099733.1	ADCYAP1	116	-1.52472	-0.835929	6.06823	0.0183643	0.360235	down
NR_038406.1	chr8	74332309	74353753	21445	+	24129	NR_038406.1	STAU2-AS1	100128126	0.867672	-0.157429	6.05106	0.0185186	0.362883	up
NM_005345.5	chr6	31783291	31785719	2429	+	18280	NM_005345.5	HSPA1A	3303	1.1597	8.94024	6.04338	0.018588	0.363204	up
NM_003899.3	chr13	111806061	111958081	152021	+	37469	NM_003899.3	ARHGEF7	8874	1.4789	-1.40106	6.69954	0.018594	0.363204	up
NR_023915.1	chr15	25361692	25367623	5932	+	40051	NR_023915.1	IPW	3653	0.411377	5.85726	6.04181	0.0186022	0.363204	up
NM_152788.4	chr12	99128569	100378432	1249864	-	36636	NM_152788.4	ANKS1B	56899	-0.657554	2.73454	6.04073	0.018612	0.363204	down
NM_145197.2	chr2	99771418	99779620	8203	+	6525	NM_145197.2	LIPT1	51601	-1.34146	-1.00156	6.03771	0.0186394	0.363362	down
NR_015445.1	chr8	144779285	144780583	1299	+	24455	NR_015445.1	BREA2	286076	0.957572	-0.135247	6.0335	0.0186777	0.363605	up
NM_001256718.1	chr6	84262604	84418520	155917	-	20260	NM_001256718.1	SNAP91	9892	-1.56581	-1.31184	6.03211	0.0186904	0.363605	down
NM_024594.3	chr5	167982628	168006614	23987	-	17676	NM_024594.3	PANK3	79646	-0.294203	5.69858	6.02651	0.0187415	0.363922	down
NM_001204453.1	chr7	102987971	103002914	14944	+	21813	NM_001204453.1	PSMC2	5701	-1.63109	-1.20304	6.02355	0.0187686	0.363922	down
NM_015621.2	chr5	150560613	150603654	43042	-	17587	NM_015621.2	CCDC69	26112	0.636656	6.39676	6.02299	0.0187737	0.363922	up
NR_132753.1	chr12	50850354	50850569	216	+	34626	NR_132753.1	SNORD133	106633800	1.4539	-1.215	6.02058	0.0187958	0.363922	up
NM_198991.3	chr18	24034874	24220308	185435	-	48179	NM_198991.3	KCTD1	284252	-1.37332	-1.40218	6.16252	0.0188032	0.363922	down
NR_027840.1	chr3	197477261	197511317	34057	+	11395	NR_027840.1	FYTTD1	84248	-0.853691	0.182046	6.01473	0.0188495	0.364373	down
NM_001320675.1	chr15	59951345	59981125	29781	-	41433	NM_001320675.1	BNIP2	663	1.24014	-1.30779	6.15298	0.0188873	0.364373	up
NM_001080480.2	chr6	20099915	20212695	112781	-	19506	NM_001080480.2	MBOAT1	154141	-1.46593	-1.332	6.15261	0.0188905	0.364373	down
NM_001172132.1	chr20	30639991	30689659	49669	+	52507	NM_001172132.1	HCK	3055	1.55555	-1.26723	6.00627	0.0189275	0.364373	up
NM_004701.3	chr15	59397284	59417244	19961	+	40493	NM_004701.3	CCNB2	9133	1.16095	0.415609	6.0049	0.0189402	0.364373	up
NM_001270468.1	chr12	93964757	93970521	5765	+	35069	NM_001270468.1	SOCS2	8835	1.26735	-1.02785	6.00098	0.0189765	0.364373	up
NR_003950.1	chr22	23732792	23744799	12008	-	55359	NR_003950.1	ZDHHC8P1	150244	0.532769	5.63712	5.99893	0.0189954	0.364373	up
NM_005560.4	chr20	60884116	60942368	58253	-	53755	NM_005560.4	LAMA5	3911	0.585042	5.812	5.99779	0.019006	0.364373	up
NM_006113.4	chr1	108113782	108507545	393764	-	4269	NM_006113.4	VAV3	10451	-0.794234	1.69793	5.99374	0.0190436	0.364373	down
NR_135036.1	chr12	92539861	92579560	39700	+	35048	NR_135036.1	LOC101928617	101928617	1.42669	-1.18573	5.99363	0.0190446	0.364373	up
NR_125936.1	chr4	31999001	32157028	158028	+	13296	NR_125936.1	LOC102723828	NA	1.80616	-1.12987	5.99334	0.0190473	0.364373	up
NM_005634.2	chrX	139585152	139587225	2074	-	57907	NM_005634.2	SOX3	6658	-0.621076	2.97078	5.99214	0.0190585	0.364373	down
NR_036519.1	chr17	80407591	80408707	1117	-	47597	NR_036519.1	C17orf62	NA	0.603206	0.899573	5.98737	0.0191029	0.364758	up
NM_001285549.1	chr2	207139752	207179151	39400	+	7346	NM_001285549.1	ZDBF2	57683	-1.27066	-1.0764	5.98583	0.0191174	0.364758	down
NR_033919.1	chr6	139790132	139795733	5602	-	20641	NR_033919.1	LINC01625	645434	-0.658632	1.55344	5.98225	0.0191508	0.364762	down
NR_001458.3	chr21	26934457	26947480	13024	+	53878	NR_001458.3	MIR155HG	114614	1.21377	-0.219682	5.98167	0.0191562	0.364762	up
NM_006990.4	chr1	27730730	27816698	85969	-	3464	NM_006990.4	WASF2	10163	0.440002	4.29127	5.97925	0.0191789	0.364824	up
NM_020949.2	chr3	170177342	170303863	126522	-	12740	NM_020949.2	SLC7A14	57709	-0.930203	7.19133	5.97438	0.0192245	0.365324	down
NM_001042724.1	chr19	45349393	45392485	43093	+	49717	NM_001042724.1	NECTIN2	5819	0.659713	4.0501	5.96849	0.01928	0.365861	up
NM_207373.2	chr10	85933554	85945050	11497	+	28669	NM_207373.2	C10orf99	387695	1.41799	-1.43593	6.95689	0.0192916	0.365861	up
NM_001330120.1	chr10	88715558	88723017	7460	+	28693	NM_001330120.1	SNCG	6623	1.57088	-1.0607	5.96112	0.0193495	0.366591	up
NM_001560.2	chrX	117861559	117928496	66938	+	56679	NM_001560.2	IL13RA1	3597	0.632443	7.44215	5.95898	0.0193698	0.366606	up
NM_138287.3	chr3	122283185	122294050	10866	+	10784	NM_138287.3	DTX3L	151636	0.690606	6.21517	5.95076	0.0194478	0.367667	up
NM_001001933.1	chr1	75594119	75627218	33100	+	1160	NM_001001933.1	LHX8	431707	-1.1966	0.598284	5.94875	0.019467	0.367667	down
NM_207360.2	chr6	149768766	149806148	37383	-	20697	NM_207360.2	ZC3H12D	340152	0.697112	1.64738	5.94692	0.0194844	0.367667	up
NM_002800.4	chr6	32821938	32827628	5691	+	18330	NM_002800.4	PSMB9	5698	0.57805	5.28418	5.93991	0.0195513	0.36851	up
NR_030342.1	chr11	61559967	61560033	67	-	33105	NR_030342.1	MIR611	693196	-1.46453	-1.31129	5.93797	0.0195699	0.36851	down
NM_006355.4	chr6	25962917	25987557	24641	+	18012	NM_006355.4	TRIM38	10475	0.792249	4.12118	5.9345	0.0196032	0.36851	up
NM_024571.3	chr16	103829	107669	3841	+	42027	NM_024571.3	SNRNP25	79622	0.271705	7.33012	5.93408	0.0196072	0.36851	up
NM_001308248.1	chr1	92974253	93257961	283709	-	4183	NM_001308248.1	EVI5	7813	1.43876	-1.25519	6.07067	0.01963	0.368571	up
NM_147148.2	chr1	110198698	110208123	9426	+	1432	NM_147148.2	GSTM4	2948	0.445004	2.52743	5.92963	0.01965	0.368579	up
NM_002097.2	chr13	27998681	28009846	11166	+	37091	NM_002097.2	GTF3A	2971	0.276708	7.66234	5.92567	0.0196881	0.368658	up
NM_002851.2	chr7	121513159	121702090	188932	+	21912	NM_002851.2	PTPRZ1	5803	-0.743223	7.65753	5.92195	0.019724	0.368658	down
NM_153018.2	chr17	4981754	4999669	17916	+	44492	NM_153018.2	ZFP3	124961	-0.288821	5.71307	5.92184	0.019725	0.368658	down
NM_014619.4	chr11	120382455	120859514	477060	+	32273	NM_014619.4	GRIK4	2900	-1.30036	-0.706815	5.92108	0.0197324	0.368658	down
NM_000921.4	chr12	20522179	20837041	314863	+	34406	NM_000921.4	PDE3A	5139	-0.551447	1.34743	5.91226	0.0198178	0.369886	down
NM_058246.3	chr7	157129711	157210133	80423	+	22271	NM_058246.3	DNAJB6	10049	0.4611	6.67516	5.90205	0.0199171	0.371274	up
NM_183373.3	chr6	3722836	3752246	29411	-	19385	NM_183373.3	PXDC1	221749	0.596881	6.77172	5.90058	0.0199315	0.371274	up
NM_133464.3	chr9	114287439	114306712	19274	+	26199	NM_133464.3	ZNF483	158399	-0.47047	5.1285	5.89703	0.0199662	0.371541	down
NR_049794.1	chr9	89563613	89616948	53336	+	25998	NR_049794.1	GAS1RR	100506834	-0.448311	1.32026	5.89508	0.0199853	0.371541	down
NM_005564.4	chr9	130911709	130915734	4026	+	26398	NM_005564.4	LCN2	3934	-1.67608	0.148621	5.89072	0.0200281	0.371892	down
NM_003838.4	chr1	74663896	74674386	10491	+	1151	NM_003838.4	FPGT	8790	-0.476136	2.65891	5.88914	0.0200436	0.371892	down
NM_001143759.1	chr10	134145614	134166901	21288	+	29204	NM_001143759.1	LRRC27	80313	-1.45194	-1.30372	5.882	0.020114	0.371987	down
NM_003775.3	chr19	3178736	3180330	1595	+	48585	NM_003775.3	S1PR4	8698	0.530927	1.76163	5.8812	0.0201218	0.371987	up
NR_036586.1	chr2	65128974	65159581	30608	-	8319	NR_036586.1	LOC400958	NA	1.60148	-0.978579	5.88107	0.0201231	0.371987	up
NM_021052.2	chr6	26217148	26217711	564	+	18034	NM_021052.2	HIST1H2AE	3012	0.630387	0.476679	5.8806	0.0201277	0.371987	up
NM_000301.3	chr6	161123225	161175086	51862	+	19291	NM_000301.3	PLG	5340	-1.22929	-0.675203	5.87111	0.0202217	0.373247	down
NM_012268.3	chr19	40854332	40884397	30066	+	49564	NM_012268.3	PLD3	23646	1.49519	-1.25879	5.86972	0.0202354	0.373247	up
NM_138493.2	chr6	37450696	37467700	17005	-	19933	NM_138493.2	CCDC167	154467	0.381334	4.91455	5.85824	0.0203498	0.374776	up
NR_002449.2	chr9	130210781	130210916	136	-	27526	NR_002449.2	SNORA65	26783	1.00319	-0.29883	5.85599	0.0203722	0.374776	up
NM_203347.1	chr9	139654086	139658965	4880	-	27764	NM_203347.1	LCN15	389812	1.71572	-0.58865	5.85191	0.0204131	0.374776	up
NM_001303108.1	chr9	104235440	104249052	13613	-	27306	NM_001303108.1	TMEM246	84302	-1.39547	-1.23817	5.85093	0.020423	0.374776	down
NR_135825.1	chr14	70653825	70699300	45476	+	38589	NR_135825.1	LOC646548	646548	-1.19004	-0.587182	5.85005	0.0204318	0.374776	down
NM_001649.3	chrX	9754496	9917483	162988	+	55906	NM_001649.3	SHROOM2	357	-0.480583	3.10191	5.8479	0.0204534	0.374776	down
NM_002257.3	chr19	51322402	51327043	4642	-	51769	NM_002257.3	KLK1	3816	1.44458	-0.51612	5.84748	0.0204575	0.374776	up
NM_001002034.2	chr22	42470255	42475442	5188	+	55107	NM_001002034.2	FAM109B	NA	0.534189	3.18449	5.84156	0.0205171	0.375447	up
NM_022170.1	chr7	73588706	73611429	22724	+	21467	NM_022170.1	EIF4H	7458	1.46888	-1.34272	5.97496	0.020534	0.375447	up
NM_147196.2	chr3	46742823	46752413	9591	+	10210	NM_147196.2	TMIE	259236	0.739905	3.78424	5.8302	0.020632	0.376768	up
NM_015419.3	chrX	3226606	3264684	38079	-	57025	NM_015419.3	MXRA5	25878	-0.860692	3.48526	5.82811	0.0206531	0.376768	down
NR_136286.1	chr9	99918175	100001024	82850	-	27272	NR_136286.1	ANKRD18CP	101926917	0.78067	0.979991	5.82683	0.0206662	0.376768	up
NM_002116.7	chr6	29910247	29913661	3415	+	18153	NM_002116.7	HLA-A	3105	0.401519	9.46909	5.82204	0.0207149	0.377291	up
NM_001159920.1	chr13	28959688	29069265	109578	-	37612	NM_001159920.1	FLT1	2321	0.835893	7.85237	5.80723	0.0208662	0.379366	up
NR_110172.1	chr19	36233428	36236343	2916	-	51157	NR_110172.1	U2AF1L4	199746	1.40184	-1.29152	5.8069	0.0208697	0.379366	up
NM_020375.2	chr12	4430359	4469194	38836	+	34166	NM_020375.2	TIGAR	57103	0.395397	5.71479	5.79832	0.0209579	0.379366	up
NR_026758.2	chr2	130783571	130808704	25134	-	8876	NR_026758.2	FAR2P1	440905	-1.2281	0.332937	5.79611	0.0209808	0.379366	down
NR_073064.1	chr6	485138	693141	208004	-	19350	NR_073064.1	EXOC2	55770	-1.43965	-1.37467	5.92865	0.0209876	0.379366	down
NM_178450.4	chr5	126203406	126366500	163095	-	17254	NM_178450.4	2003-03-01	115123	0.563343	5.04233	5.79324	0.0210104	0.379366	up
NM_022143.4	chr7	127667124	127671002	3879	-	23277	NM_022143.4	LRRC4	64101	-0.432801	6.71779	5.79285	0.0210145	0.379366	down
NM_002638.3	chr20	43803540	43805185	1646	+	52731	NM_002638.3	PI3	5266	1.4604	-0.605815	5.79018	0.0210421	0.379366	up
NM_000239.2	chr12	69742134	69748013	5880	+	34957	NM_000239.2	LYZ	4069	1.11312	4.58679	5.7886	0.0210585	0.379366	up
NM_002517.3	chr19	47523101	47549033	25933	+	49792	NM_002517.3	NPAS1	4861	1.20399	0.712606	5.78686	0.0210765	0.379366	up
NM_199242.2	chr17	73823306	73840798	17493	-	47390	NM_199242.2	UNC13D	201294	0.669824	3.20939	5.78433	0.0211028	0.379366	up
NM_000336.2	chr16	23313591	23392620	79030	+	42490	NM_000336.2	SCNN1B	6338	-1.42507	-1.32056	5.78071	0.0211404	0.379366	down
NM_018648.3	chr15	34633917	34635362	1446	-	41147	NM_018648.3	NOP10	55505	0.233053	6.31247	5.77863	0.0211621	0.379366	up
NM_000766.4	chr19	41594356	41602100	7745	+	49585	NM_000766.4	CYP2A13	1553	-1.36764	-1.30652	5.77657	0.0211836	0.379366	down
NM_130808.2	chr3	131252404	131754286	501883	-	12494	NM_130808.2	CPNE4	131034	-1.30587	1.33155	5.7752	0.0211978	0.379366	down
NM_033118.3	chr20	30407178	30422500	15323	+	52499	NM_033118.3	MYLK2	85366	-0.69119	3.07915	5.77413	0.021209	0.379366	down
NM_001005851.2	chr19	40534167	40562115	27949	-	51319	NM_001005851.2	ZNF780B	163131	-0.362993	5.03575	5.77343	0.0212163	0.379366	down
NM_001130845.1	chr3	187439165	187454285	15121	-	12897	NM_001130845.1	BCL6	604	0.9608	-0.119099	5.77196	0.0212317	0.379366	up
NM_016430.3	chr21	38437664	38445458	7795	-	54408	NM_016430.3	PIGP	51227	1.35013	-0.695572	5.77133	0.0212383	0.379366	up
NM_198723.1	chr20	62688439	62703700	15262	+	53045	NM_198723.1	TCEA2	6919	0.831375	0.242328	5.76816	0.0212715	0.379366	up
NM_001308295.1	chr10	15149865	15210709	60845	-	29398	NM_001308295.1	NMT2	9397	-1.63199	-1.29939	5.76621	0.0212919	0.379366	down
NM_001142552.1	chr4	155243806	155412877	169072	-	15033	NM_001142552.1	DCHS2	54798	-0.768812	2.26863	5.764	0.0213151	0.379366	down
NM_138392.3	chr19	41082757	41097305	14549	+	49569	NM_138392.3	SHKBP1	92799	0.434704	5.57509	5.75664	0.0213926	0.379366	up
NM_001257407.1	chr16	27325230	27376099	50870	+	42526	NM_001257407.1	IL4R	3566	1.72608	-0.742883	5.75306	0.0214304	0.379366	up
NM_001039778.2	chr4	110224191	110237291	13101	+	13754	NM_001039778.2	ZCCHC23	645078	-1.37708	-0.655359	5.75223	0.0214391	0.379366	down
NM_018111.2	chr19	49621654	49622397	744	-	51669	NM_018111.2	C19orf73	55150	0.50884	2.03775	5.7494	0.0214691	0.379366	up
NM_001297576.1	chr1	160175109	160185166	10058	+	2024	NM_001297576.1	PEA15	8682	1.4761	-0.83911	5.74839	0.0214798	0.379366	up
NR_036442.1	chr16	1025761	1031318	5558	-	43419	NR_036442.1	LMF1	64788	0.404957	7.60261	5.7468	0.0214966	0.379366	up
NM_003014.3	chr7	37945534	37956525	10992	-	22562	NM_003014.3	SFRP4	6424	-0.706823	3.9917	5.74635	0.0215014	0.379366	down
NR_110029.2	chr7	89511667	89840949	329283	-	22911	NR_110029.2	STEAP2-AS1	100874100	-1.52481	-1.38003	7.05795	0.0215083	0.379366	down
NR_030630.1	chr2	176032361	176032437	77	-	9159	NR_030630.1	MIR933	100126350	-1.52412	-1.38689	6.105	0.0215083	0.379366	down
NM_001242862.2	chr1	84647315	84704181	56867	+	1220	NM_001242862.2	PRKACB	5567	-1.65344	-1.36768	6.35131	0.0215083	0.379366	down
NM_001330450.1	chr17	67498363	67550002	51640	+	45642	NM_001330450.1	MAP2K6	5608	-0.354759	5.16329	5.74547	0.0215107	0.379366	down
NM_018690.3	chr16	28505970	28510291	4322	+	42533	NM_018690.3	APOBR	55911	0.78926	2.57557	5.7439	0.0215273	0.379366	up
NR_002946.1	chr1	1631378	1633247	1870	+	51	NR_002946.1	MMP23A	8511	1.33039	-0.942718	5.74335	0.0215331	0.379366	up
NM_020371.2	chr15	34158428	34331303	172876	-	41138	NM_020371.2	AVEN	57099	0.399609	4.51964	5.74009	0.0215679	0.379461	up
NM_001237.4	chr4	122737599	122745156	7558	-	14908	NM_001237.4	CCNA2	890	0.987534	0.820573	5.73906	0.0215788	0.379461	up
NM_001001412.3	chr10	105213144	105218648	5505	-	30378	NM_001001412.3	CALHM1	255022	-0.865942	0.333691	5.73179	0.0216563	0.380143	down
NM_001164213.1	chr13	47127296	47327176	199881	+	37208	NM_001164213.1	LRCH1	23143	0.543827	4.26365	5.73164	0.0216579	0.380143	up
NM_005583.4	chr19	13209842	13213974	4133	-	50851	NM_005583.4	LYL1	4066	0.59097	4.36983	5.72951	0.0216808	0.38019	up
NM_198450.5	chrX	84258898	84348323	89426	+	56439	NM_198450.5	APOOL	139322	-0.189161	6.27348	5.72132	0.0217685	0.380862	down
NM_001443.2	chr2	88422501	88427650	5150	-	8561	NM_001443.2	FABP1	2168	1.37013	-0.398349	5.72058	0.0217765	0.380862	up
NR_046231.1	chr10	134779038	134790001	10964	+	29213	NR_046231.1	LINC01168	399829	-1.09645	-0.101462	5.72028	0.0217797	0.380862	down
NM_020630.4	chr10	43572517	43622952	50436	+	28268	NM_020630.4	RET	5979	-0.756412	0.221298	5.71502	0.0218363	0.381498	down
NM_017545.2	chr20	7863631	7921093	57463	-	53190	NM_017545.2	HAO1	54363	1.51055	-1.37936	6.23084	0.0218694	0.381557	up
NM_000949.6	chr5	35055802	35230691	174890	-	16755	NM_000949.6	PRLR	5618	-1.454	-1.22779	5.71096	0.0218802	0.381557	down
NM_005251.2	chr16	86600857	86602539	1683	+	43242	NM_005251.2	FOXC2	2303	-0.604113	1.92971	5.70825	0.0219094	0.381703	down
NM_020904.2	chr19	49340354	49371884	31531	-	51654	NM_020904.2	PLEKHA4	57664	1.03024	0.188572	5.70644	0.0219291	0.381703	up
NM_013381.2	chr12	72666529	73059422	392894	+	34997	NM_013381.2	TRHDE	29953	-1.10499	3.91257	5.70384	0.0219572	0.381715	down
NM_003966.2	chr5	9035138	9546233	511096	-	16674	NM_003966.2	SEMA5A	9037	-0.518924	7.17543	5.70264	0.0219702	0.381715	down
NM_018462.4	chr3	10157333	10168874	11542	+	9842	NM_018462.4	BRK1	55845	0.222336	8.50667	5.69817	0.0220188	0.382207	up
NM_001143979.1	chr16	15737124	15820210	83087	+	42385	NM_001143979.1	NDE1	54820	1.2573	-1.31269	5.82466	0.0220467	0.382339	up
NM_019109.4	chr16	5121810	5137380	15571	+	42309	NM_019109.4	ALG1	56052	-0.753361	0.577051	5.69137	0.0220929	0.382788	down
NM_001330379.1	chr11	111779344	111781477	2134	-	33756	NM_001330379.1	CRYAB	1410	0.680157	3.46934	5.68893	0.0221195	0.382897	up
NR_040038.1	chr2	231555636	231565244	9609	-	9605	NR_040038.1	LINC01907	151475	1.33269	-0.601987	5.68343	0.0221798	0.383017	up
NR_120604.1	chr8	10332075	10339484	7410	+	23617	NR_120604.1	LINCR-0001	101929191	-1.05506	-0.383137	5.68331	0.0221811	0.383017	down
NM_001495.4	chr8	21549530	21646346	96817	-	24673	NM_001495.4	GFRA2	2675	-1.13822	-0.462447	5.68217	0.0221936	0.383017	down
NM_000988.3	chr17	41150446	41154976	4531	+	45158	NM_000988.3	RPL27	6155	0.345258	8.90232	5.67992	0.0222183	0.383017	up
NM_001098523.1	chr11	20385687	20389201	3515	+	31029	NM_001098523.1	HTATIP2	10553	0.581566	1.17448	5.67903	0.022228	0.383017	up
NM_001330482.1	chr19	37902044	37958360	56317	-	51232	NM_001330482.1	ZNF569	148266	-1.23485	-0.780866	5.67367	0.0222871	0.383684	down
NM_001099269.2	chr19	19903520	19932560	29041	-	51038	NM_001099269.2	ZNF506	440515	-0.648813	1.01609	5.66821	0.0223474	0.38437	down
NM_001301782.1	chr19	54972976	54974894	1919	-	52001	NM_001301782.1	LENG9	94059	0.398931	1.91092	5.65776	0.0224631	0.385975	up
NM_001289174.1	chr6	33218049	33239742	21694	-	19821	NM_001289174.1	VPS52	6293	1.46122	-1.35167	5.65546	0.0224887	0.385975	up
NM_020964.2	chr18	43427574	43547305	119732	-	48265	NM_020964.2	EPG5	57724	-0.29345	6.36565	5.65289	0.0225173	0.385975	down
NM_001304449.1	chr2	133064717	133076320	11604	+	6850	NM_001304449.1	ZNF806	646915	-0.889257	-0.0310518	5.65126	0.0225355	0.385975	down
NR_103458.1	chr5	113769227	113832197	62971	+	15852	NR_103458.1	KCNN2	3781	-1.60674	-1.33873	5.77679	0.0225538	0.385975	down
NR_136267.1	chr7	30287043	30325701	38659	-	22495	NR_136267.1	LOC105375218	105375218	1.28865	-1.06143	5.64875	0.0225635	0.385975	up
NM_138689.2	chr11	64011951	64014413	2463	-	33204	NM_138689.2	PPP1R14B	26472	0.587168	4.47656	5.63801	0.0226838	0.387681	up
NM_152436.2	chr12	75784850	75817820	32971	+	35002	NM_152436.2	GLIPR1L2	144321	-0.62975	1.21444	5.63373	0.022732	0.387825	down
NM_013249.2	chr11	7020549	7041586	21038	-	32628	NM_013249.2	ZNF214	7761	-0.457249	3.09562	5.63207	0.0227507	0.387825	down
NM_000347.5	chr14	65233117	65289866	56750	-	39577	NM_000347.5	SPTB	6710	0.956523	-0.42929	5.63178	0.0227539	0.387825	up
NR_026712.1	chr10	98510023	98510680	658	+	28843	NR_026712.1	RPL13AP5	728658	0.307885	8.69201	5.62966	0.0227778	0.387882	up
NM_030817.2	chr12	12938541	12944400	5860	+	34352	NM_030817.2	APOLD1	81575	-1.75855	-1.08211	5.62537	0.0228263	0.388356	down
NM_006284.3	chr11	6632048	6633475	1428	-	32620	NM_006284.3	TAF10	6881	0.250181	7.52108	5.62285	0.0228549	0.38836	up
NM_005527.3	chr6	31777396	31782835	5440	-	19744	NM_005527.3	HSPA1L	3305	0.316989	4.46832	5.62171	0.0228677	0.38836	up
NM_002952.3	chr16	2012062	2014827	2766	-	43453	NM_002952.3	RPS2	6187	0.312873	5.60853	5.6193	0.0228951	0.388474	up
NM_001278372.1	chr17	41952727	41985310	32584	-	46883	NM_001278372.1	MPP2	4355	-1.53257	-1.32691	5.73953	0.0229573	0.389179	down
NR_144452.1	chr13	74987094	74993252	6159	-	37907	NR_144452.1	LOC100288208	100288208	-1.57647	-1.27485	5.73463	0.0230109	0.389738	down
NM_182491.2	chr7	1192543	1199855	7313	-	22300	NM_182491.2	ZFAND2A	90637	0.265759	6.08167	5.60407	0.0230686	0.390334	up
NM_001277307.1	chrX	16185604	16189516	3913	+	55960	NM_001277307.1	MAGEB17	645864	1.46578	-1.3486	5.84445	0.0230875	0.390334	up
NR_131243.1	chr17	17577340	17581002	3663	-	46379	NR_131243.1	SMCR2	105371564	0.896572	-0.629364	5.59996	0.0231156	0.39046	up
NM_198582.3	chr2	239047363	239061547	14185	+	7694	NM_198582.3	KLHL30	377007	-0.760792	0.555462	5.59204	0.0232067	0.391647	down
NM_001083619.1	chr4	158141736	158287227	145492	+	13987	NM_001083619.1	GRIA2	2891	-1.00152	0.66385	5.58437	0.0232952	0.392789	down
NM_001085372.2	chr11	62439126	62441162	2037	+	31509	NM_001085372.2	UQCC3	790955	0.328564	5.28997	5.57602	0.0233919	0.393936	up
NR_038332.1	chr19	42636781	42641251	4471	+	49634	NR_038332.1	LOC100505622	100505622	1.52525	-0.998478	5.57489	0.0234051	0.393936	up
NM_001042601.2	chr3	180319918	180328918	9001	+	11204	NM_001042601.2	TTC14	151613	-0.606887	1.46078	5.57043	0.023457	0.394458	down
NM_001256802.1	chr11	75110535	75133346	22812	+	31896	NM_001256802.1	RPS3	6188	0.420925	4.51872	5.56728	0.0234937	0.394723	up
NM_001080508.2	chr6	85442214	85473954	31741	-	20269	NM_001080508.2	TBX18	9096	-0.507766	4.33772	5.5634	0.023539	0.394999	down
NM_006984.4	chr13	96204947	96232010	27064	+	37387	NM_006984.4	CLDN10	9071	-0.424442	3.86813	5.56229	0.023552	0.394999	down
NM_014299.2	chr19	15357847	15391262	33416	-	50919	NM_014299.2	BRD4	23476	0.408194	5.56183	5.55757	0.0236073	0.395153	up
NM_000591.3	chr5	140011313	140013035	1723	-	17434	NM_000591.3	CD14	929	1.45853	-1.27062	5.68059	0.0236118	0.395153	up
NR_110573.1	chr2	219231388	219232625	1238	-	9492	NR_110573.1	CATIP-AS1	101928513	1.25389	-0.904198	5.5523	0.0236692	0.395153	up
NM_031287.2	chr6	144416018	144416754	737	-	20685	NM_031287.2	SF3B5	83443	0.247511	7.23782	5.55122	0.0236819	0.395153	up
NR_133947.1	chr7	123634676	123667700	33025	+	21924	NR_133947.1	LOC105375483	105375483	-0.811727	1.41792	5.55097	0.0236848	0.395153	down
NM_005545.3	chr15	74466087	74469212	3126	+	40683	NM_005545.3	ISLR	3671	-0.79812	0.558654	5.55079	0.0236869	0.395153	down
NM_001004.3	chr11	809936	812876	2941	+	30698	NM_001004.3	RPLP2	6181	0.298344	8.9074	5.54349	0.0237731	0.396011	up
NM_152444.2	chr14	74318621	74352168	33548	+	38634	NM_152444.2	PTGR2	145482	-1.3638	-1.12619	5.54255	0.0237841	0.396011	down
NM_001272068.1	chr3	48509197	48541483	32287	-	11830	NM_001272068.1	SHISA5	51246	1.55765	-1.23722	5.54109	0.0238014	0.396011	up
NM_001113434.4	chr17	21431571	21454941	23371	-	46450	NM_001113434.4	C17orf51	NA	-0.323209	6.76764	5.53764	0.0238423	0.396341	down
NM_032345.2	chr12	56295197	56321697	26501	-	36279	NM_032345.2	PYM1	84305	0.549397	1.25757	5.53415	0.0238837	0.39668	up
NM_005095.2	chr1	35734568	35887545	152978	+	661	NM_005095.2	ZMYM4	9202	-0.234112	7.33737	5.53	0.0239331	0.396839	down
NM_001136499.1	chr19	52567719	52599018	31300	-	51870	NM_001136499.1	ZNF841	284371	-0.801346	-0.426353	5.52713	0.0239672	0.396839	down
NM_201286.3	chrX	55511049	55515631	4583	-	57397	NM_201286.3	USP51	158880	-0.400524	4.82476	5.52633	0.0239768	0.396839	down
NR_047551.1	chr7	55247443	55256642	9200	-	22707	NR_047551.1	EGFR-AS1	100507500	-1.12767	-0.585656	5.52603	0.0239804	0.396839	down
NM_001286265.1	chr6	24403136	24423707	20572	+	17992	NM_001286265.1	MRS2	57380	0.536668	2.2118	5.52189	0.0240299	0.396839	up
NM_001042693.2	chr1	53099016	53122737	23722	+	975	NM_001042693.2	FAM159A	NA	1.03403	-0.623331	5.52113	0.0240389	0.396839	up
NM_016215.4	chr9	139557379	139567130	9752	+	26620	NM_016215.4	EGFL7	51162	1.46172	-1.29573	5.52098	0.0240407	0.396839	up
NR_027706.1	chr5	111755280	111756675	1396	+	15833	NR_027706.1	EPB41L4A-AS2	NA	-0.441679	2.41223	5.51676	0.0240913	0.397327	down
NM_033238.2	chr15	74287014	74340160	53147	+	40678	NM_033238.2	PML	5371	0.391703	5.58303	5.51298	0.0241366	0.397663	up
NM_203298.2	chr10	75541808	75543406	1599	+	28563	NM_203298.2	CHCHD1	118487	0.217867	5.85735	5.51155	0.0241539	0.397663	up
NM_145201.5	chr8	144656955	144660521	3567	-	25488	NM_145201.5	NAPRT	93100	-1.38116	-1.3132	5.50093	0.0242819	0.399097	down
NM_001282931.1	chr19	30189793	30206452	16660	-	51090	NM_001282931.1	C19orf12	83636	-0.981325	-0.658508	5.50081	0.0242833	0.399097	down
NM_182925.4	chr5	180028506	180076624	48119	-	17821	NM_182925.4	FLT4	2324	-1.0808	5.11465	5.49318	0.0243758	0.399732	down
NR_002594.1	chr16	21529214	21531765	2552	-	43768	NR_002594.1	SLC7A5P2	387254	0.624133	1.14123	5.4927	0.0243817	0.399732	up
NM_001135048.1	chr14	75894920	75939404	44485	+	38664	NM_001135048.1	JDP2	122953	1.60279	-1.14025	5.49238	0.0243855	0.399732	up
NM_001017963.2	chr14	102547075	102606086	59012	-	39914	NM_001017963.2	HSP90AA1	3320	0.476492	5.01748	5.4901	0.0244132	0.399838	up
NM_022363.2	chr12	113900694	113909877	9184	-	36812	NM_022363.2	LHX5	64211	1.515	-1.32715	5.6048	0.0244837	0.400644	up
NM_178566.4	chr9	14611069	14693480	82412	-	26752	NM_178566.4	ZDHHC21	340481	-0.274258	6.43041	5.4794	0.0245438	0.401279	down
NM_001348041.2	chr7	33169152	33676526	507375	+	21198	NM_001348041.2	BBS9	27241	1.10224	0.00641373	5.47446	0.0246042	0.401685	up
NM_138440.2	chr16	4421849	4433529	11681	+	42278	NM_138440.2	VASN	114990	0.506016	5.79198	5.4739	0.0246112	0.401685	up
NM_007361.3	chr14	52471520	52535946	64427	-	39451	NM_007361.3	NID2	22795	-0.396108	4.02612	5.47136	0.0246423	0.401845	down
NM_178134.2	chr1	47533160	47583992	50833	+	923	NM_178134.2	CYP4Z1	199974	-1.10632	-0.745409	5.46782	0.0246859	0.402207	down
NM_006010.5	chr3	51422668	51426828	4161	+	10319	NM_006010.5	MANF	7873	0.459874	6.16309	5.46137	0.0247654	0.403154	up
NR_120459.1	chr12	70636086	70637140	1055	-	36462	NR_120459.1	LINC01481	101928062	0.643114	1.6077	5.45348	0.0248631	0.404113	up
NM_018215.3	chr19	46969748	46974820	5073	-	51552	NM_018215.3	PNMAL1	NA	-0.820112	1.48917	5.45208	0.0248805	0.404113	down
NM_001010.2	chr9	19376254	19380235	3982	-	26779	NM_001010.2	RPS6	6194	0.348188	10.1168	5.45143	0.0248886	0.404113	up
NM_001718.5	chr6	7726332	7881961	155630	+	17913	NM_001718.5	BMP6	654	0.404322	5.54558	5.44541	0.0249635	0.404848	up
NR_110391.1	chrX	71908799	71932190	23392	+	56394	NR_110391.1	PHKA1-AS1	101928259	-1.52424	-1.33772	5.44434	0.0249768	0.404848	down
NM_001098831.1	chr10	99374310	99393913	19604	-	30238	NM_001098831.1	MORN4	118812	1.37082	-1.36464	5.55829	0.0250362	0.405187	up
NM_001301187.1	chr15	77905366	78112674	207309	-	41759	NM_001301187.1	LINGO1	84894	-1.36771	-1.3718	5.84936	0.0250501	0.405187	down
NM_001318536.1	chr13	80910111	80914243	4133	-	37941	NM_001318536.1	SPRY2	10253	-0.900252	-0.354275	5.4375	0.0250622	0.405187	down
NM_001321818.1	chr14	68286496	69149835	863340	+	38562	NM_001321818.1	RAD51B	5890	1.06193	-0.695545	5.43494	0.0250943	0.405359	up
NR_033531.2	chr22	37168447	37172177	3731	-	55590	NR_033531.2	IFT27	11020	1.08005	-0.781778	5.43226	0.025128	0.405554	up
NM_001321990.1	chr15	75519094	75522031	2938	-	41719	NM_001321990.1	LOC105376731	105376731	1.63548	-1.12465	5.54713	0.0251708	0.405715	up
NM_153343.3	chr4	185009859	185139114	129256	-	15148	NM_153343.3	ENPP6	133121	-0.548122	5.38444	5.42804	0.025181	0.405715	down
NR_028139.1	chr15	100884662	100890923	6262	-	41988	NR_028139.1	SPATA41	388182	-0.871552	-0.282039	5.41879	0.0252976	0.406301	down
NM_001007533.3	chr17	79791368	79792926	1559	-	47535	NM_001007533.3	PPP1R27	116729	1.57122	-1.12224	5.41862	0.0252998	0.406301	up
NM_175078.2	chr12	53083410	53097247	13838	-	36173	NM_175078.2	KRT77	374454	-1.4313	-1.39513	5.53644	0.0253005	0.406301	down
NM_001031848.1	chr18	61637263	61653887	16625	+	47988	NM_001031848.1	SERPINB8	5271	-1.38181	-1.35989	5.5344	0.0253252	0.406301	down
NR_024330.1	chr19	52196593	52208443	11851	+	50021	NR_024330.1	SPACA6	147650	0.919896	2.31205	5.4157	0.0253367	0.406301	up
NM_014047.2	chr19	13885257	13889587	4331	+	48939	NM_014047.2	C19orf53	28974	0.252021	7.83612	5.41491	0.0253467	0.406301	up
NR_105010.1	chr5	73618311	73624182	5872	+	15634	NR_105010.1	LINC01333	101929082	-1.41192	-1.31458	5.52788	0.0254048	0.406886	down
NR_038433.2	chr13	45373640	45383766	10127	-	37761	NR_038433.2	LINC00330	144817	1.27321	0.745247	5.40624	0.0254568	0.407373	up
NM_001798.4	chr12	56360553	56366573	6021	+	34789	NM_001798.4	CDK2	1017	1.3463	-1.36646	5.41872	0.0255288	0.407833	up
NM_153331.3	chr3	58484092	58488087	3996	+	10438	NM_153331.3	KCTD6	200845	1.40714	-1.36969	5.8279	0.0255288	0.407833	up
NM_018370.2	chr12	102271105	102317401	46297	+	35161	NM_018370.2	DRAM1	55332	0.629058	4.67927	5.39791	0.025563	0.408034	up
NM_175619.2	chr4	48492269	48496406	4138	+	13399	NM_175619.2	ZAR1	326340	-1.07613	0.349268	5.39135	0.0256471	0.409029	down
NM_001317027.1	chr19	58433252	58446755	13504	-	52120	NM_001317027.1	ZNF418	147686	1.22739	-1.23267	5.38378	0.0257445	0.409981	up
NM_004529.3	chr9	20341663	20622542	280880	-	26783	NM_004529.3	MLLT3	4300	-0.965096	-0.0983773	5.38221	0.0257646	0.409981	down
NM_006816.2	chr5	176758563	176778885	20323	-	17754	NM_006816.2	LMAN2	10960	0.200064	7.64816	5.38164	0.025772	0.409981	up
NM_001168357.1	chr6	46672053	46703430	31378	-	20092	NM_001168357.1	PLA2G7	7941	-1.38169	-1.25933	5.37689	0.0258334	0.410345	down
NM_002856.2	chr19	45349393	45382198	32806	+	49716	NM_002856.2	NECTIN2	5819	0.537245	4.39646	5.3765	0.0258384	0.410345	up
NM_001101387.1	chr17	10725792	10741418	15627	-	46305	NM_001101387.1	PIRT	644139	1.28581	4.07152	5.36869	0.0259397	0.411607	up
NM_001828.5	chr19	40221893	40228669	6777	-	51312	NM_001828.5	CLC	1178	-1.47824	-1.20757	5.36559	0.0259799	0.411719	down
NM_032811.2	chr11	124492742	124505822	13081	+	32305	NM_032811.2	TBRG1	84897	1.10502	-0.896021	5.36479	0.0259904	0.411719	up
NM_173664.5	chr5	175792471	175800503	8033	+	16517	NM_173664.5	ARL10	285598	-0.501533	2.70881	5.35673	0.0260955	0.412253	down
NM_012067.2	chr1	19609057	19615280	6224	-	3290	NM_012067.2	AKR7A3	22977	-0.546311	3.18092	5.35571	0.0261089	0.412253	down
NM_018326.2	chr7	150264458	150271041	6584	+	22190	NM_018326.2	GIMAP4	55303	0.65402	6.36616	5.35298	0.0261446	0.412253	up
NM_020822.2	chr9	138594031	138684993	90963	+	26609	NM_020822.2	KCNT1	57582	1.19909	-1.38351	5.65593	0.0261611	0.412253	up
NM_058222.2	chr10	114043414	114064793	21380	+	29028	NM_058222.2	TECTB	6975	0.698094	0.748838	5.34986	0.0261856	0.412253	up
NR_003142.2	chr16	2014997	2015505	509	+	42137	NR_003142.2	SNHG9	735301	0.597723	3.86338	5.34852	0.0262031	0.412253	up
NR_037675.1	chr19	47777659	47778980	1322	+	49800	NR_037675.1	INAFM1	255783	0.568865	1.25449	5.34819	0.0262075	0.412253	up
NM_198182.2	chr2	10091792	10142412	50621	+	5809	NM_198182.2	GRHL1	29841	-0.614846	1.2378	5.34709	0.026222	0.412253	down
NM_031266.2	chr5	177631508	177638184	6677	+	16566	NM_031266.2	HNRNPAB	3182	0.491442	1.53827	5.34609	0.0262351	0.412253	up
NM_033260.3	chr6	1312675	1314993	2319	+	17859	NM_033260.3	FOXQ1	94234	-0.668953	5.60234	5.3455	0.0262428	0.412253	down
NM_001541.3	chr11	111783460	111784817	1358	+	32106	NM_001541.3	HSPB2	3316	0.438468	5.01857	5.34	0.0263153	0.412496	up
NM_014634.3	chr22	22273792	22307250	33459	-	55336	NM_014634.3	PPM1F	9647	0.330769	6.88298	5.33909	0.0263272	0.412496	up
NM_000218.2	chr11	2466221	2870340	404120	+	30769	NM_000218.2	KCNQ1	3784	1.02546	-0.512693	5.33884	0.0263306	0.412496	up
NM_001040450.2	chr15	59063391	59154099	90709	+	40486	NM_001040450.2	FAM63B	NA	1.12164	-0.97765	5.33769	0.0263458	0.412496	up
NM_003055.2	chr10	50818347	50820766	2420	+	28351	NM_003055.2	SLC18A3	6572	-1.05568	4.67193	5.3345	0.026388	0.412543	down
NM_145799.3	chrX	118750908	118827333	76426	-	57736	NM_145799.3	2006-09-01	NA	0.681189	1.56625	5.33116	0.0264322	0.412543	up
NM_001128203.1	chr11	63341934	63381941	40008	-	33191	NM_001128203.1	PLA2G16	NA	-1.3403	-1.18317	5.331	0.0264343	0.412543	down
NR_028337.1	chr17	75875083	75880169	5087	-	47448	NR_028337.1	LINC01973	400624	1.17168	-0.969523	5.33085	0.0264364	0.412543	up
NM_001198801.1	chr1	21132785	21503381	370597	-	3323	NM_001198801.1	EIF4G3	8672	-1.29077	-1.37811	5.43933	0.0265125	0.41332	down
NR_145448.1	chr6	10404735	10408160	3426	+	17918	NR_145448.1	HIPSTR	NA	-0.673812	0.226208	5.3238	0.02653	0.41332	down
NM_001024809.3	chr17	38498271	38513895	15625	+	45081	NM_001024809.3	RARA	5914	1.27315	-1.00515	5.32019	0.026578	0.413726	up
NM_001287340.1	chr5	36192691	36241493	48803	-	16766	NM_001287340.1	NADK2	133686	-1.20715	-1.31786	5.4311	0.0266181	0.414007	down
NR_110698.1	chr1	26551811	26556331	4521	+	480	NR_110698.1	LOC101928303	101928303	0.587407	1.72902	5.31367	0.0266651	0.414284	up
NM_000421.3	chr17	38974369	38978863	4495	-	46740	NM_000421.3	KRT10	3858	0.303373	6.19211	5.30992	0.0267155	0.414284	up
NM_144697.3	chr1	150254943	150259505	4563	+	1670	NM_144697.3	CIART	148523	-1.27456	-1.35353	5.42312	0.0267209	0.414284	down
NM_201380.3	chr8	144989315	145025044	35730	-	25526	NM_201380.3	PLEC	5339	1.07801	0.458657	5.30823	0.0267381	0.414284	up
NM_003102.2	chr4	24797085	24802467	5383	+	13268	NM_003102.2	SOD3	6649	0.479755	6.84919	5.30766	0.0267458	0.414284	up
NR_104609.1	chr5	117618269	117620472	2204	+	15869	NR_104609.1	LINC02148	100505811	-1.35528	-1.13939	5.30113	0.0268336	0.415287	down
NM_001135806.1	chr12	79439433	79845788	406356	+	35012	NM_001135806.1	SYT1	6857	-1.61967	-0.931593	5.29608	0.0269018	0.415287	down
NR_003275.2	chr8	11985367	11986806	1440	-	24593	NR_003275.2	LOC392196	392196	-1.47374	-1.41944	6.58432	0.0269141	0.415287	down
NM_199450.2	chr10	64133916	64240048	106133	+	28412	NM_199450.2	ZNF365	22891	0.730664	0.23756	5.29503	0.026916	0.415287	up
NM_014553.2	chr2	121974163	122042778	68616	-	8822	NM_014553.2	TFCP2L1	29842	0.708119	3.7641	5.29297	0.0269439	0.415287	up
NM_000679.3	chr5	159343740	159400017	56278	+	16388	NM_000679.3	ADRA1B	147	-0.508192	3.61029	5.29274	0.026947	0.415287	down
NM_001297643.1	chr12	7254201	7261874	7674	-	35682	NM_001297643.1	C1RL	51279	1.14054	-1.13786	5.28935	0.0269929	0.415287	up
NM_006454.2	chr4	2249160	2263739	14580	-	14174	NM_006454.2	MXD4	10608	0.34562	8.07509	5.28707	0.0270238	0.415287	up
NM_005082.4	chr17	54965270	54991409	26140	-	47093	NM_005082.4	TRIM25	7706	0.299271	6.33882	5.28582	0.0270408	0.415287	up
NR_030584.1	chrX	145078187	145078261	75	-	57923	NR_030584.1	MIR892A	100126342	-1.45297	-1.31299	5.28544	0.0270459	0.415287	down
NR_130151.1	chr22	39925098	39928860	3763	-	55668	NR_130151.1	RPS19BP1	91582	-1.38906	-1.36446	5.28311	0.0270777	0.415287	down
NM_001197293.2	chr8	26371709	26515693	143985	+	23808	NM_001197293.2	DPYSL2	1808	-0.779773	2.07111	5.28168	0.0270971	0.415287	down
NM_181353.2	chr20	30193086	30194318	1233	+	52494	NM_181353.2	ID1	3397	-1.18859	-0.0141566	5.28045	0.0271139	0.415287	down
NR_038261.1	chr1	42312860	42501596	188737	-	3727	NR_038261.1	HIVEP3	59269	1.42315	-1.22847	5.28008	0.0271189	0.415287	up
NM_000161.2	chr14	55308723	55369542	60820	-	39474	NM_000161.2	GCH1	2643	0.763335	1.86221	5.27773	0.027151	0.415441	up
NM_001004354.2	chr9	140194083	140196703	2621	-	27791	NM_001004354.2	NRARP	441478	-0.466033	6.53838	5.26346	0.0273466	0.418094	down
NM_001197.4	chr22	43506754	43525718	18965	+	55118	NM_001197.4	BIK	638	0.938549	0.165552	5.25272	0.0274947	0.41996	up
NM_001496.3	chr5	137588069	137610253	22185	-	17384	NM_001496.3	GFRA3	2676	-0.960017	0.925386	5.25139	0.0275132	0.41996	down
NM_002043.4	chr6	89964183	90025018	60836	-	20307	NM_002043.4	GABRR2	2570	1.17644	-0.454805	5.24703	0.0275736	0.420542	up
NM_024652.5	chr15	101459420	101613095	153676	+	41049	NM_024652.5	LRRK1	79705	0.551733	3.926	5.24154	0.0276499	0.420927	up
NM_002105.2	chr11	118964584	118966177	1594	-	33894	NM_002105.2	H2AFX	3014	0.327894	7.5922	5.24018	0.0276688	0.420927	up
NM_001267612.1	chr1	168048780	168105674	56895	-	5093	NM_001267612.1	GPR161	23432	1.30118	-1.41366	5.63475	0.0276786	0.420927	up
NR_104131.1	chr1	95123089	95285837	162749	-	4210	NR_104131.1	LINC01057	NA	0.680316	1.75289	5.23533	0.0277366	0.420927	up
NM_014365.2	chr12	119616595	119632551	15957	+	35353	NM_014365.2	HSPB8	26353	0.511929	9.55954	5.23472	0.027745	0.420927	up
NR_109956.1	chr20	21175044	21198927	23884	-	53258	NR_109956.1	KIZ-AS1	101929591	-1.17723	-0.723646	5.2343	0.027751	0.420927	down
NM_138471.2	chr11	63580846	63595190	14345	+	31545	NM_138471.2	C11orf84	NA	0.300204	5.61047	5.234	0.0277551	0.420927	up
NM_003536.2	chr6	27777842	27778314	473	+	18083	NM_003536.2	HIST1H3H	8357	1.42576	-0.924541	5.2273	0.027849	0.42201	up
NM_004997.2	chr1	203136939	203144942	8004	-	5352	NM_004997.2	MYBPH	4608	0.781106	0.416245	5.22396	0.0278959	0.422381	up
NM_015461.2	chr18	22641888	22932214	290327	-	48172	NM_015461.2	ZNF521	25925	-1.40067	-1.12796	5.21748	0.027987	0.423014	down
NM_182527.2	chr22	30116344	30127822	11479	+	54878	NM_182527.2	CABP7	164633	-0.546003	4.20632	5.21699	0.027994	0.423014	down
NM_001330377.1	chr17	53828340	53854748	26409	+	45454	NM_001330377.1	PCTP	58488	1.11114	0.0610572	5.21622	0.0280049	0.423014	up
NM_020337.2	chr4	125585203	125633887	48685	-	14920	NM_020337.2	ANKRD50	57182	-0.401632	2.57723	5.2142	0.0280334	0.423105	down
NR_136518.1	chr16	53069602	53086785	17184	-	43986	NR_136518.1	LOC105371267	105371267	1.50785	-1.18694	5.31991	0.0280911	0.423636	up
NM_002928.3	chr1	182567758	182573548	5791	-	5218	NM_002928.3	RGS16	6004	0.561743	4.22396	5.19928	0.0282452	0.425606	up
NM_002657.3	chr20	30780307	30795546	15240	-	53350	NM_002657.3	PLAGL2	5326	0.321387	5.30098	5.19776	0.0282669	0.425606	up
NM_021819.2	chr15	75105194	75118099	12906	+	40699	NM_021819.2	LMAN1L	79748	-1.20957	-1.09666	5.19347	0.0283281	0.42606	down
NM_025243.3	chr2	228549926	228582745	32820	-	9587	NM_025243.3	SLC19A3	80704	0.650041	4.90453	5.18931	0.0283876	0.42606	up
NM_001006666.1	chr22	39436673	39440428	3756	+	55040	NM_001006666.1	APOBEC3F	200316	0.823701	0.0192304	5.18877	0.0283953	0.42606	up
NR_109964.1	chr21	45834473	45845446	10974	-	54521	NR_109964.1	TRPM2-AS	101928607	1.14134	-0.461586	5.18809	0.0284051	0.42606	up
NM_001114132.1	chr2	203879602	204082717	203116	+	7316	NM_001114132.1	NBEAL1	65065	-0.338206	3.94972	5.18775	0.02841	0.42606	down
NR_026836.1	chr12	72656327	72667289	10963	-	36477	NR_026836.1	TRHDE-AS1	283392	-0.680938	0.502044	5.18488	0.0284511	0.426337	down
NM_006012.2	chr19	6361463	6368915	7453	+	48674	NM_006012.2	CLPP	8192	0.237659	6.81465	5.17406	0.028607	0.428236	up
NM_203351.1	chr17	61699801	61773670	73870	+	45561	NM_203351.1	MAP3K3	4215	1.39269	-1.31208	5.2813	0.0286233	0.428236	up
NM_001198954.1	chr2	86730553	86948245	217693	-	8542	NM_001198954.1	RNF103-CHMP3	100526767	-1.24261	-1.06567	5.16724	0.0287057	0.429129	down
NM_017841.2	chr11	61197597	61214239	16643	+	31478	NM_017841.2	SDHAF2	54949	0.206862	6.31352	5.16395	0.0287534	0.429501	up
NM_003247.3	chr6	169615875	169654209	38335	-	20841	NM_003247.3	THBS2	7058	-0.558154	8.06798	5.1597	0.0288152	0.429831	down
NM_080742.2	chr6	71571069	71666788	95720	-	20202	NM_080742.2	B3GAT2	135152	-0.647596	3.23524	5.15865	0.0288305	0.429831	down
NR_110574.1	chr2	165697259	165705906	8648	+	6969	NR_110574.1	LOC101929633	101929633	1.10832	-0.5034	5.15773	0.0288439	0.429831	up
NR_135292.1	chr10	89102493	89117059	14567	+	28702	NR_135292.1	LINC00863	439994	-0.524724	1.39122	5.14697	0.0290013	0.431463	down
NM_001004696.1	chr1	248524883	248525929	1047	+	2979	NM_001004696.1	OR2T4	127074	1.33764	-1.3108	5.14594	0.0290164	0.431463	up
NR_046240.1	chr9	131486741	131495522	8782	+	26440	NR_046240.1	LOC100506100	100506100	0.464681	3.07231	5.14516	0.0290278	0.431463	up
NM_003399.5	chrX	128872946	128903525	30580	+	56729	NM_003399.5	XPNPEP2	7512	-0.785801	0.4638	5.14386	0.0290469	0.431463	down
NM_004974.3	chr1	111145776	111148975	3200	-	4318	NM_004974.3	KCNA2	3737	-0.619574	2.57409	5.14244	0.0290678	0.431463	down
NR_038969.1	chr9	138354564	138364095	9532	-	27718	NR_038969.1	PPP1R26-AS1	100506599	-0.65202	1.11984	5.13926	0.0291146	0.431817	down
NM_006742.2	chr16	67927175	67963581	36407	+	43006	NM_006742.2	PSKH1	5681	0.307097	6.51249	5.13557	0.0291689	0.432282	up
NM_003650.3	chr20	24929866	24940564	10699	+	52447	NM_003650.3	CST7	8530	0.798914	1.58442	5.13254	0.0292137	0.432606	up
NM_000107.2	chr11	47236493	47260769	24277	+	31262	NM_000107.2	DDB2	1643	0.478635	2.87559	5.12799	0.029281	0.433263	up
NM_001318927.1	chr2	210867289	210886984	19696	+	7386	NM_001318927.1	RPE	6120	1.44817	-1.30884	5.12086	0.0293869	0.434488	up
NM_005036.4	chr22	46546499	46639653	93155	+	55172	NM_005036.4	PPARA	5465	-1.24644	-1.07986	5.11588	0.029461	0.435243	down
NM_198391.2	chr20	14304639	14318313	13675	-	53221	NM_198391.2	FLRT3	23767	-1.31739	-1.18921	5.10902	0.0295636	0.436416	down
NM_005524.3	chr3	193853931	193856401	2471	+	11361	NM_005524.3	HES1	3280	-0.551534	6.41015	5.10404	0.0296382	0.437175	down
NM_016297.3	chr2	70485231	70508317	23087	+	6276	NM_016297.3	PCYOX1	51449	-0.2549	8.11924	5.09635	0.029754	0.438539	down
NM_016234.3	chr10	114135956	114188138	52183	+	29032	NM_016234.3	ACSL5	51703	1.06242	0.979664	5.08881	0.0298679	0.439195	up
NR_104417.1	chr6	5108653	5261183	152531	-	19399	NR_104417.1	LYRM4	57128	1.30832	-1.45987	6.66275	0.0298793	0.439195	up
NR_029501.1	chr19	13947254	13947331	78	-	50866	NR_029501.1	MIR27A	407018	1.29039	-1.45654	6.71382	0.0298793	0.439195	up
NM_005516.5	chr6	30457183	30461982	4800	+	18173	NM_005516.5	HLA-E	3133	0.493066	10.2682	5.08724	0.0298916	0.439195	up
NM_021128.4	chr11	839721	842529	2809	-	32458	NM_021128.4	POLR2L	5441	0.268278	7.69319	5.08326	0.0299521	0.43974	up
NM_001008781.2	chr11	92085262	92629636	544375	+	32002	NM_001008781.2	FAT3	120114	-0.416976	7.94847	5.08074	0.0299903	0.439761	down
NM_002019.4	chr13	28874483	29069265	194783	-	37610	NM_002019.4	FLT1	2321	0.782122	7.9301	5.0801	0.0300001	0.439761	up
NM_001330637.1	chr9	13105703	13279712	174010	-	26746	NM_001330637.1	MPDZ	8777	-1.30973	-1.15837	5.07172	0.0301278	0.440866	down
NM_152543.2	chr4	159814684	159956333	141650	-	15052	NM_152543.2	C4orf45	152940	-1.38495	-1.28934	5.07034	0.030149	0.440866	down
NM_001289024.1	chr6	39302876	39399150	96275	-	19951	NM_001289024.1	KIF6	221458	1.41284	-1.29876	5.06861	0.0301754	0.440866	up
NM_052840.4	chr15	72577068	72612525	35458	-	41624	NM_052840.4	CELF6	60677	-1.45397	-1.35767	5.17112	0.030204	0.440866	down
NM_016230.3	chr6	84569370	84670146	100777	+	18770	NM_016230.3	CYB5R4	51167	0.395842	4.99368	5.06649	0.0302078	0.440866	up
NM_020870.3	chr4	170015407	170192249	176843	-	15083	NM_020870.3	SH3RF1	57630	-0.195902	7.16574	5.06475	0.0302346	0.440866	down
NM_001288623.1	chr2	203637873	203736195	98323	-	9364	NM_001288623.1	ICA1L	130026	-0.841543	-0.0895839	5.06445	0.0302392	0.440866	down
NR_102326.1	chr6	30255174	30294933	39760	-	19659	NR_102326.1	HCG18	414777	-0.364154	3.14023	5.06085	0.0302944	0.441329	down
NM_177401.4	chr19	1248552	1259142	10591	+	48532	NM_177401.4	MIDN	90007	0.47426	7.71288	5.05562	0.0303749	0.441439	up
NM_001290030.1	chr2	171627192	171655481	28290	+	7020	NM_001290030.1	ERICH2	285141	-1.22571	-0.754162	5.05457	0.0303912	0.441439	down
NM_001320227.1	chr3	160939078	160971320	32243	+	11135	NM_001320227.1	NMD3	51068	-0.536272	0.90965	5.05304	0.0304149	0.441439	down
NR_110919.1	chr12	133464428	133465157	730	+	35529	NR_110919.1	LOC101928530	101928530	0.586804	0.231416	5.05288	0.0304173	0.441439	up
NM_001317915.1	chr5	57878015	58155221	277207	+	15492	NM_001317915.1	RAB3C	115827	-1.4956	-0.553223	5.05277	0.030419	0.441439	down
NM_018965.3	chr6	41126244	41130924	4681	-	19981	NM_018965.3	TREM2	54209	1.0613	1.22552	5.04931	0.0304724	0.441445	up
NM_021109.3	chrX	12993226	12995346	2121	+	55930	NM_021109.3	TMSB4X	7114	0.252947	9.81362	5.04824	0.030489	0.441445	up
NM_001167625.1	chr12	2162416	2807115	644700	+	34140	NM_001167625.1	CACNA1C	775	-1.40733	-1.33334	5.0482	0.0304897	0.441445	down
NM_003471.3	chr3	155860751	156256927	396177	+	11078	NM_003471.3	KCNAB1	7881	-0.721933	-0.0828875	5.04657	0.0305149	0.441471	down
NM_174858.2	chr1	77747662	78025654	277993	+	1180	NM_174858.2	AK5	26289	-0.555402	3.98391	5.04161	0.0305918	0.441739	down
NM_015397.3	chr9	34086381	34126771	40391	-	26882	NM_015397.3	DCAF12	25853	0.31667	6.40696	5.04051	0.0306089	0.441739	up
NR_039667.1	chr5	154209018	154209100	83	+	16354	NR_039667.1	MIR378H	100616306	-1.29436	-0.985087	5.03805	0.0306473	0.441739	down
NR_110427.1	chr19	22703797	22710751	6955	-	51066	NR_110427.1	LOC101929124	101929124	1.29542	-0.718847	5.03735	0.0306581	0.441739	up
NM_138420.2	chr14	105403591	105444694	41104	-	39947	NM_138420.2	AHNAK2	113146	0.591535	5.01788	5.03613	0.0306772	0.441739	up
NM_004538.5	chrX	92925925	92928682	2758	-	57560	NM_004538.5	NAP1L3	4675	-0.5357	8.20131	5.03286	0.0307282	0.441739	down
NM_003508.2	chr7	72848109	72850450	2342	+	21442	NM_003508.2	FZD9	8326	0.418523	4.56215	5.03273	0.0307302	0.441739	up
NM_001318809.1	chr6	13266774	13328815	62042	-	19458	NM_001318809.1	TBC1D7-LOC100130357	107080638	-1.12888	1.16684	5.03236	0.0307359	0.441739	down
NM_145659.3	chr16	28510683	28518155	7473	-	43814	NM_145659.3	IL27	246778	1.20608	-1.09677	5.03183	0.0307443	0.441739	up
NM_001324309.1	chr1	6650784	6662958	12175	-	3149	NM_001324309.1	KLHL21	9903	-0.621834	0.662903	5.03012	0.030771	0.441785	down
NM_001303095.1	chr1	156691683	156698231	6549	-	4887	NM_001303095.1	ISG20L2	81875	0.219712	5.73591	5.02711	0.0308181	0.442026	up
NM_001346444.1	chr7	51132096	51384558	252463	-	22701	NM_001346444.1	COBL	23242	-0.71891	0.601388	5.02605	0.0308347	0.442026	down
NM_014010.4	chr9	119187504	120177317	989814	-	27428	NM_014010.4	ASTN2	23245	-0.379962	6.06903	5.0202	0.0309265	0.442724	down
NM_001014380.2	chr13	30776767	30881191	104425	-	37624	NM_001014380.2	KATNAL1	84056	-1.36432	-1.30235	5.01996	0.0309303	0.442724	down
NR_033887.1	chr1	20686294	20755287	68994	-	3311	NR_033887.1	LINC01141	339505	0.74207	0.919686	5.0165	0.0309848	0.443167	up
NM_001130142.1	chr11	123986111	124017619	31509	+	32298	NM_001130142.1	VWA5A	4013	-1.24561	-1.37797	5.11735	0.0310101	0.443193	down
NR_110909.1	chr16	14103133	14109875	6743	-	43675	NR_110909.1	LOC101927311	NA	0.94656	1.31353	5.00909	0.0311017	0.444166	up
NM_178353.1	chr1	152758753	152760902	2150	+	1764	NM_178353.1	LCE1E	353135	-1.29383	-1.38698	5.10467	0.0312037	0.445285	down
NM_001330509.1	chr16	19179156	19279656	100501	+	42411	NM_001330509.1	SYT17	51760	1.29175	-1.17669	4.99498	0.031326	0.446691	up
NM_006993.2	chr10	103541082	103543170	2089	-	30343	NM_006993.2	NPM3	10360	0.365799	3.91127	4.99111	0.0313876	0.447232	up
NM_007199.2	chr12	66582978	66648402	65425	+	34926	NM_007199.2	IRAK3	11213	1.36254	-1.01299	4.98248	0.0315259	0.448613	up
NM_001199764.1	chr2	220154345	220173729	19385	-	9529	NM_001199764.1	PTPRN	5798	1.78517	-1.07075	5.08335	0.0315321	0.448613	up
NR_120335.1	chr15	45543779	45571420	27642	-	41295	NR_120335.1	LOC101928414	101928414	-0.801718	0.887796	4.97429	0.0316577	0.449994	down
NM_178454.4	chr1	111659954	111682838	22885	-	4324	NM_178454.4	DRAM2	128338	0.350396	5.75648	4.9724	0.0316882	0.449994	up
NM_006871.3	chr14	24805227	24809242	4016	-	39301	NM_006871.3	RIPK3	11035	0.771936	1.52833	4.97162	0.0317008	0.449994	up
NR_031652.1	chr17	79106996	79107108	113	-	47493	NR_031652.1	MIR1250	100302229	-1.30209	-1.23028	4.96832	0.0317542	0.450412	down
NM_001161725.1	chr14	102228135	102394329	166195	+	39015	NM_001161725.1	PPP2R5C	5527	1.5208	-1.28074	5.06556	0.0318089	0.45085	up
NM_016298.3	chr3	121312170	121349139	36970	+	10769	NM_016298.3	FBXO40	51725	-1.23792	-0.240692	4.9609	0.0318745	0.45144	down
NM_001845.5	chr13	110801305	110959504	158200	-	38071	NM_001845.5	COL4A1	1282	0.590631	6.07531	4.95468	0.0319758	0.452535	up
NM_000867.4	chr2	231972947	231989824	16878	-	9608	NM_000867.4	HTR2B	3357	-1.4123	-1.36473	5.22948	0.0320108	0.45269	down
NM_178562.4	chr7	128784712	128809535	24824	+	21972	NM_178562.4	TSPAN33	340348	0.383601	6.35862	4.94664	0.0321071	0.453179	up
NM_001345.4	chr12	56324946	56347807	22862	+	34784	NM_001345.4	DGKA	1606	1.44332	-1.29375	5.04616	0.032114	0.453179	up
NM_001304813.1	chr17	42088556	42100519	11964	-	46895	NM_001304813.1	TMEM101	84336	-1.19201	-1.21588	4.94459	0.0321407	0.453179	down
NM_000798.4	chr4	9783258	9785633	2376	+	13219	NM_000798.4	DRD5	1816	-1.02923	2.89917	4.94313	0.0321648	0.453179	down
NR_001578.1	chr8	11197146	11225961	28816	+	23625	NR_001578.1	TDH	157739	0.815069	0.283701	4.94194	0.0321842	0.453179	up
NM_017822.3	chr12	49046994	49076035	29042	-	36046	NM_017822.3	KANSL2	54934	0.236715	5.58907	4.9415	0.0321915	0.453179	up
NM_017805.2	chr19	49223842	49243970	20129	-	51642	NM_017805.2	RASIP1	54922	0.486573	5.71539	4.94015	0.0322137	0.453179	up
NM_053053.3	chr1	166825747	166845654	19908	-	5080	NM_053053.3	TADA1	117143	-0.297625	5.67148	4.9381	0.0322474	0.453223	down
NR_004400.1	chr1	149224058	149224221	164	-	4531	NR_004400.1	RNVU1-18	26863	-1.27111	-1.419	5.2816	0.0322649	0.453223	down
NR_026660.1	chr7	102781717	102782850	1134	-	23119	NR_026660.1	RPL19P12	100129424	0.201412	6.86948	4.93484	0.0323011	0.453317	up
NR_123713.1	chr12	1020902	1058888	37987	-	35569	NR_123713.1	RAD52	5893	1.38255	-1.2691	4.9318	0.0323513	0.453317	up
NM_005454.2	chr9	14719731	14722715	2985	-	26753	NM_005454.2	CER1	9350	-0.944847	0.112422	4.93093	0.0323657	0.453317	down
NM_001129.4	chr7	44143960	44154164	10205	+	21261	NM_001129.4	AEBP1	165	0.635052	8.33199	4.9308	0.0323678	0.453317	up
NM_001320464.1	chr16	30662023	30667761	5739	+	42650	NM_001320464.1	PRR14	78994	1.06179	-1.07937	4.92633	0.0324417	0.453682	up
NR_144545.1	chr16	75681635	75691340	9706	+	43132	NR_144545.1	TERF2IP	54386	-1.25404	-1.36536	4.92413	0.0324782	0.453682	down
NM_001040429.2	chr13	58205789	58303065	97277	+	37291	NM_001040429.2	PCDH17	27253	-0.330819	8.24149	4.92394	0.0324814	0.453682	down
NM_017798.3	chr20	61826781	61847538	20758	-	53776	NM_017798.3	YTHDF1	54915	0.163232	7.29992	4.92082	0.0325331	0.453682	up
NM_138433.3	chr22	50986462	50989452	2991	+	55226	NM_138433.3	KLHDC7B	113730	0.888936	0.19075	4.92053	0.0325379	0.453682	up
NM_001008778.1	chr11	64937707	64940688	2982	+	31626	NM_001008778.1	SPDYC	387778	1.22714	-1.11781	4.92014	0.0325445	0.453682	up
NM_014468.3	chr10	135051408	135055434	4027	+	29221	NM_014468.3	VENTX	27287	1.03296	0.152823	4.91907	0.0325623	0.453682	up
NM_003527.4	chr6	27861203	27861669	467	+	18088	NM_003527.4	HIST1H2BO	8348	1.28297	-1.41672	5.58243	0.0326884	0.455102	up
NR_039760.1	chr22	42319226	42319301	76	-	55706	NR_039760.1	MIR378I	100616259	1.11988	-0.54141	4.90727	0.0327591	0.455751	up
NM_001199880.1	chr8	22545174	22549902	4729	-	24690	NM_001199880.1	EGR3	1960	-1.33422	-1.36788	4.90546	0.0327894	0.455835	down
NM_000110.3	chr1	97543299	98386615	843317	-	4222	NM_000110.3	DPYD	1806	0.619781	4.57656	4.90034	0.0328754	0.45667	up
NR_103720.1	chr7	99933702	99938951	5250	+	21726	NR_103720.1	STAG3L5P	101735302	-1.1504	-0.912775	4.89782	0.0329178	0.45667	down
NR_051970.1	chr9	138392477	138396519	4043	+	26592	NR_051970.1	MRPS2	51116	1.32558	-1.04563	4.89716	0.0329288	0.45667	up
NM_030930.3	chr11	67758571	67771595	13025	-	33376	NM_030930.3	UNC93B1	81622	0.385836	5.38654	4.89612	0.0329463	0.45667	up
NR_023358.1	chrX	20154184	20154531	348	-	57144	NR_023358.1	SCARNA9L	100158262	0.897074	-0.311411	4.8935	0.0329905	0.456946	up
NM_002145.3	chr17	46620017	46622393	2377	-	46999	NM_002145.3	HOXB2	3212	0.918146	-0.0819887	4.88781	0.0330866	0.457657	up
NM_014045.4	chr14	23340926	23350922	9997	+	38188	NM_014045.4	LRP10	26020	0.447865	7.29353	4.8857	0.0331224	0.457657	up
NM_001017961.4	chr1	166038536	166135992	97457	-	5078	NM_001017961.4	FAM78B	149297	-0.818399	-0.139441	4.88473	0.0331389	0.457657	down
NM_012101.3	chr11	119981994	120008863	26870	-	33912	NM_012101.3	TRIM29	23650	1.29032	-0.901081	4.88313	0.0331661	0.457657	up
NM_001330724.1	chr4	76501704	76555724	54021	-	14564	NM_001330724.1	CDKL2	8999	-0.962567	-0.022965	4.88203	0.0331847	0.457657	down
NR_038393.1	chr7	22602956	22613617	10662	+	21062	NR_038393.1	LOC100506178	100506178	0.674022	1.08138	4.87984	0.0332219	0.457657	up
NM_005537.5	chr13	111367359	111373421	6063	+	37458	NM_005537.5	ING1	3621	0.931154	-0.34714	4.87879	0.0332397	0.457657	up
NR_036490.1	chr1	182584275	182585764	1490	+	2311	NR_036490.1	LINC01686	284648	0.625009	0.417241	4.87768	0.0332586	0.457657	up
NR_040671.1	chr6	79943391	79946517	3127	+	18748	NR_040671.1	HMGN3-AS1	100288198	-0.418701	2.4513	4.87627	0.0332826	0.457657	down
NM_004833.1	chr1	159032275	159046647	14373	-	4939	NM_004833.1	AIM2	9447	0.833971	0.524655	4.87615	0.0332846	0.457657	up
NM_000518.4	chr11	5246696	5248301	1606	-	32569	NM_000518.4	HBB	3043	1.0933	9.69347	4.86879	0.0334103	0.458049	up
NR_110858.1	chr10	127408084	127452712	44629	+	29167	NR_110858.1	EDRF1	26098	1.16102	-1.30963	4.86788	0.0334259	0.458049	up
NM_015589.5	chr14	55034330	55260033	225704	+	38439	NM_015589.5	SAMD4A	23034	0.735691	0.35149	4.86536	0.033469	0.458049	up
NR_046728.1	chr3	113122845	113152839	29995	+	10699	NR_046728.1	CFAP44-AS1	100874029	-1.5438	-1.26557	4.96078	0.0334953	0.458049	down
NM_032582.3	chr17	58254691	58469586	214896	-	47165	NM_032582.3	USP32	84669	-0.268235	7.1996	4.86222	0.0335229	0.458049	down
NR_036262.1	chr5	118310281	118310365	85	+	15871	NR_036262.1	MIR1244-2	100422885	1.30688	-1.31156	4.91462	0.0335232	0.458049	up
NR_036595.1	chr1	110828997	110881793	52797	-	4307	NR_036595.1	LOC440600	NA	0.983289	-0.555086	4.86175	0.033531	0.458049	up
NR_106781.1	chr1	567705	567793	89	-	2996	NR_106781.1	MIR6723	NA	-1.6021	4.64033	4.86076	0.033548	0.458049	down
NM_181840.1	chr10	118957000	118969810	12811	+	29090	NM_181840.1	KCNK18	338567	-1.00604	-0.385992	4.8596	0.0335678	0.458049	down
NM_000216.3	chrX	8496915	8700228	203314	-	57043	NM_000216.3	ANOS1	3730	-0.415623	7.76417	4.85894	0.0335793	0.458049	down
NM_000146.3	chr19	49468566	49470136	1571	+	49865	NM_000146.3	FTL	2512	0.527197	12.1921	4.85888	0.0335803	0.458049	up
NR_110598.1	chr2	166813928	166892910	78983	+	6977	NR_110598.1	LOC102724058	102724058	-1.29229	-1.11244	4.85516	0.0336444	0.45859	down
NM_017999.4	chr14	24616659	24629870	13212	+	38259	NM_017999.4	RNF31	55072	-0.459042	1.37245	4.85229	0.0336938	0.458606	down
NM_002228.3	chr1	59246463	59249785	3323	-	3988	NM_002228.3	JUN	3725	-0.421738	8.44041	4.85227	0.0336942	0.458606	down
NM_001261.3	chr9	130548305	130553052	4748	+	26385	NM_001261.3	CDK9	1025	0.23455	6.87108	4.83459	0.0340009	0.462446	up
NM_004378.2	chr15	78632666	78640572	7907	+	40765	NM_004378.2	CRABP1	1381	-0.631418	6.62067	4.83123	0.0340595	0.46291	down
NM_001316349.1	chr2	137523132	138435282	912151	+	6877	NM_001316349.1	THSD7B	80731	-0.471628	2.30602	4.82914	0.0340961	0.463074	down
NR_110257.1	chr2	8699963	8723922	23960	-	7818	NR_110257.1	LINC01814	101929567	-1.20649	-1.14441	4.82726	0.0341289	0.463185	down
NM_138360.3	chr14	24521206	24538937	17732	+	38241	NM_138360.3	CARMIL3	90668	-0.340062	3.95049	4.82533	0.0341628	0.463312	down
NM_001282587.1	chr1	9299903	9331396	31494	+	154	NM_001282587.1	H6PD	9563	-1.34472	-1.29716	4.85383	0.0343084	0.464829	down
NM_174937.3	chr10	132890655	133109984	219330	-	30619	NM_174937.3	TCERG1L	256536	-1.30578	0.445645	4.81615	0.034324	0.464829	down
NR_003024.1	chr7	109599284	109600270	987	-	23190	NR_003024.1	EIF3IP1	442720	0.420418	1.62161	4.81007	0.0344312	0.464895	up
NR_033652.1	chr8	72755358	72968547	213190	+	24122	NR_033652.1	MSC-AS1	100132891	-1.39008	-1.4292	5.79156	0.0344404	0.464895	down
NR_003028.1	chr11	93463679	93463812	134	-	33603	NR_003028.1	SNORA25	684959	-0.877784	0.0713171	4.80802	0.0344675	0.464895	down
NR_047026.1	chr13	107306228	107324528	18301	+	37438	NR_047026.1	LINC00443	100874173	-1.03032	-0.147078	4.80727	0.0344809	0.464895	down
NM_178820.4	chr19	39514661	39523236	8576	-	51296	NM_178820.4	FBXO27	126433	0.248713	5.21683	4.80725	0.0344812	0.464895	up
NM_016602.2	chr17	40831420	40833845	2426	-	46836	NM_016602.2	CCR10	2826	0.383654	2.86678	4.80529	0.0345159	0.464895	up
NR_037427.1	chr7	132719620	132719675	56	-	23343	NR_037427.1	MIR3654	100500804	0.29141	5.69058	4.80219	0.0345709	0.464895	up
NR_121610.1	chr4	95664819	95678684	13866	-	14712	NR_121610.1	BMPR1B-AS1	NA	-0.630826	1.70461	4.80066	0.0345981	0.464895	down
NM_152527.4	chr2	230899690	230933715	34026	-	9600	NM_152527.4	SLC16A14	151473	-0.400011	6.13977	4.79952	0.0346183	0.464895	down
NM_001330161.1	chr2	242626427	242661222	34796	+	7749	NM_001330161.1	ING5	84289	0.406481	4.91019	4.79905	0.0346267	0.464895	up
NM_000361.2	chr20	23026270	23030301	4032	-	53269	NM_000361.2	THBD	7056	0.753429	4.81081	4.79849	0.0346366	0.464895	up
NR_015404.1	chr12	112277573	112280706	3134	-	36781	NR_015404.1	MAPKAPK5-AS1	51275	0.224735	5.59317	4.7976	0.0346525	0.464895	up
NM_019090.2	chr1	232940638	232946092	5455	+	2855	NM_019090.2	MAP10	54627	-0.516497	3.72632	4.79554	0.0346892	0.464895	down
NM_022551.2	chr6	33239852	33244281	4430	+	18348	NM_022551.2	RPS18	6222	0.488911	3.68908	4.79506	0.0346977	0.464895	up
NM_001159531.1	chr14	101003484	101034407	30924	-	39907	NM_001159531.1	BEGAIN	57596	-1.29062	-0.758294	4.79428	0.0347116	0.464895	down
NR_038359.1	chr19	51320937	51322134	1198	+	49985	NR_038359.1	LINC01869	284365	0.712249	0.946731	4.79146	0.034762	0.464895	up
NM_001323425.1	chr11	1049778	1055764	5987	+	30718	NM_001323425.1	LOC101927503	NA	-0.882197	0.26804	4.79096	0.0347709	0.464895	down
NM_001310124.1	chr19	46236509	46267797	31289	+	49766	NM_001310124.1	BHMG1	388553	1.42924	-1.26356	4.7885	0.0348149	0.464895	up
NR_136413.1	chr17	30468245	30470154	1910	-	46553	NR_136413.1	LOC105371730	105371730	0.871814	0.276669	4.78698	0.0348421	0.464895	up
NM_006891.3	chr2	208986331	208989313	2983	-	9417	NM_006891.3	CRYGD	1421	0.955081	0.279387	4.78658	0.0348492	0.464895	up
NM_004608.3	chr16	30097114	30103205	6092	-	43869	NM_004608.3	TBX6	6911	0.482023	2.02947	4.78553	0.0348682	0.464895	up
NM_001243252.1	chr2	233470767	233547491	76725	+	7614	NM_001243252.1	EFHD1	80303	-1.37183	-1.1109	4.78534	0.0348715	0.464895	down
NM_172201.1	chr21	35736323	35743440	7118	+	53975	NM_172201.1	KCNE2	9992	0.397295	1.4999	4.78355	0.0349035	0.464994	up
NM_139321.2	chr20	3451665	3631769	180105	+	52258	NM_139321.2	ATRN	8455	-0.310205	7.81288	4.78185	0.034934	0.465043	down
NM_001025159.2	chr5	149781200	149792499	11300	-	17561	NM_001025159.2	CD74	972	0.874961	2.99926	4.77859	0.0349928	0.465043	up
NM_001001712.2	chr9	139632619	139637411	4793	-	27759	NM_001001712.2	LCN10	414332	1.03939	0.711267	4.7781	0.0350014	0.465043	up
NM_021032.4	chr3	191857182	192126838	269657	-	12912	NM_021032.4	FGF12	2257	-0.791507	3.14989	4.77654	0.0350296	0.465043	down
NM_004818.2	chr12	49223539	49245957	22419	-	36055	NM_004818.2	DDX23	9416	0.256251	7.68343	4.77649	0.0350306	0.465043	up
NM_001256876.1	chr9	470294	746106	275813	+	25597	NM_001256876.1	KANK1	23189	0.713169	0.886851	4.77321	0.0350896	0.465073	up
NM_024094.2	chr8	120846181	120868170	21990	-	25307	NM_024094.2	DSCC1	79075	0.419027	3.04817	4.77292	0.0350949	0.465073	up
NR_104269.1	chr9	108282105	108289600	7496	+	26174	NR_104269.1	RALGAPA1P1	26134	-0.316538	5.82561	4.7719	0.0351133	0.465073	down
NR_125851.1	chr6	10932550	10954322	21773	-	19447	NR_125851.1	LOC101928191	101928191	-1.05678	-1.19866	4.8628	0.0351618	0.465073	down
NM_002469.2	chr12	81101408	81103257	1850	+	35016	NM_002469.2	MYF6	4618	-0.874309	0.398174	4.7691	0.0351638	0.465073	down
NM_152594.2	chr15	38545052	38649450	104399	+	40178	NM_152594.2	SPRED1	161742	-0.27093	9.05046	4.76745	0.0351938	0.465073	down
NR_038974.1	chr21	34637937	34638565	629	-	54351	NR_038974.1	IL10RB-AS1	NA	0.500335	2.09449	4.7668	0.0352055	0.465073	up
NM_001145408.1	chrX	70503042	70521018	17977	+	56363	NM_001145408.1	NONO	4841	-1.28422	-1.18803	4.76285	0.0352771	0.465692	down
NM_001330760.1	chr9	117373600	117408704	35105	+	26251	NM_001330760.1	TMEM268	203197	-1.16776	-1.17138	4.76118	0.0353074	0.465767	down
NR_135177.1	chr16	698458	699313	856	-	43392	NR_135177.1	LOC105371038	105371038	0.842094	-0.194881	4.75442	0.0354305	0.467063	up
NM_016615.4	chr12	329787	372039	42253	-	35559	NM_016615.4	SLC6A13	6540	-0.714479	1.14802	4.74785	0.0355506	0.468082	down
NM_001199165.2	chr17	63631658	64188249	556592	-	47255	NM_001199165.2	CEP112	201134	0.9664	-0.488964	4.74528	0.0355976	0.468082	up
NM_001282578.2	chr20	48697661	48729735	32075	-	53631	NM_001282578.2	UBE2V1	7335	1.39579	-1.31064	4.74506	0.0356017	0.468082	up
NM_001244950.1	chr10	73818792	73848531	29740	-	29948	NM_001244950.1	SPOCK2	9806	0.579517	1.16125	4.74476	0.0356071	0.468082	up
NR_034129.1	chr10	17428935	17450285	21351	+	28014	NR_034129.1	ST8SIA6-AS1	100128098	0.990891	-0.515399	4.74218	0.0356543	0.468111	up
NR_034008.1	chr3	156807670	156818924	11255	+	11087	NR_034008.1	LINC00881	100498859	1.03173	0.494421	4.74193	0.035659	0.468111	up
NM_031908.4	chr5	159774761	159797648	22888	-	17658	NM_031908.4	C1QTNF2	114898	-0.448957	2.76197	4.73876	0.0357173	0.468551	down
NM_012093.3	chr1	77748287	78025654	277368	+	1181	NM_012093.3	AK5	26289	-0.648664	0.15	4.73237	0.0358351	0.46933	down
NM_001024921.3	chr4	39455744	39460568	4825	-	14363	NM_001024921.3	RPL9	6133	0.426729	3.4076	4.7323	0.0358364	0.46933	up
NM_006656.5	chr11	74699950	74718743	18794	+	31888	NM_006656.5	NEU3	10825	-0.463752	3.53243	4.73148	0.0358515	0.46933	down
NM_001303524.1	chr18	12307668	12326615	18948	+	47690	NM_001303524.1	TUBB6	84617	1.2328	-1.22437	4.72781	0.0359194	0.469404	up
NM_144773.3	chr20	5281846	5297378	15533	-	53177	NM_144773.3	PROKR2	128674	-1.22775	-0.379722	4.72752	0.0359247	0.469404	down
NR_046244.1	chr3	24535578	24541502	5925	+	9956	NR_046244.1	THRB-AS1	644990	0.649616	0.538227	4.72687	0.0359367	0.469404	up
NM_001286279.1	chr13	113200796	113242499	41704	-	38092	NM_001286279.1	TUBGCP3	10426	0.599326	0.644373	4.72579	0.0359567	0.469404	up
NM_148903.2	chr2	11680080	11728366	48287	+	5835	NM_148903.2	GREB1	9687	-1.43495	-1.3028	4.7197	0.0360698	0.469882	down
NM_016608.1	chrX	100805514	100809683	4170	+	56492	NM_016608.1	ARMCX1	51309	-0.241122	6.64085	4.7179	0.0361033	0.469882	down
NR_109852.1	chr7	130628919	130794675	165757	-	23330	NR_109852.1	LINC-PINT	378805	1.20993	-1.22645	4.71749	0.0361109	0.469882	up
NM_144721.5	chr4	76439643	76455236	15594	+	13550	NM_144721.5	THAP6	152815	-1.19965	-1.01213	4.71596	0.0361394	0.469882	down
NR_136409.1	chr3	138153415	138198784	45370	+	10965	NR_136409.1	ESYT3	83850	-0.964018	-0.726467	4.71578	0.0361428	0.469882	down
NM_002852.3	chr3	157154580	157161417	6838	+	11088	NM_002852.3	PTX3	5806	0.991099	0.723503	4.71316	0.0361916	0.469882	up
NM_030797.3	chr2	16730727	16847134	116408	-	7888	NM_030797.3	FAM49A	81553	-0.400383	8.37542	4.71175	0.036218	0.469882	down
NM_001242680.1	chr19	22469252	22499978	30727	+	49172	NM_001242680.1	ZNF729	100287226	-1.37183	-1.32608	4.80301	0.0362234	0.469882	down
NM_001243926.1	chr3	50649293	50686728	37436	+	10314	NM_001243926.1	MAPKAPK3	7867	0.954533	-0.694421	4.71095	0.0362329	0.469882	up
NR_047568.1	chr3	177159709	177470492	310784	+	11182	NR_047568.1	LINC00578	100505566	1.12033	-0.660983	4.71043	0.0362426	0.469882	up
NM_022375.3	chr1	186369704	186370587	884	+	2351	NM_022375.3	OCLM	10896	-1.19147	-0.685834	4.70752	0.036297	0.470229	down
NM_001281749.1	chr11	116714118	116969131	255014	-	33828	NM_001281749.1	SIK3	23387	-0.725351	0.365557	4.70634	0.0363192	0.470229	down
NM_022044.2	chr22	21996542	21998588	2047	+	54737	NM_022044.2	SDF2L1	23753	0.292523	5.47393	4.70113	0.0364169	0.47117	up
NM_020664.3	chr16	451858	462487	10630	+	42049	NM_020664.3	DECR2	26063	0.358037	5.28664	4.69891	0.0364587	0.471388	up
NM_030625.2	chr10	70320117	70454239	134123	+	28454	NM_030625.2	TET1	80312	-0.378493	3.42068	4.69716	0.0364916	0.47149	down
NM_201630.1	chr1	204586301	204654597	68297	-	5376	NM_201630.1	LRRN2	10446	-0.86052	-0.155996	4.6946	0.0365399	0.471776	down
NM_003468.3	chr2	208627310	208634143	6834	-	9415	NM_003468.3	FZD5	7855	0.285723	4.76792	4.69279	0.036574	0.471776	up
NR_102280.1	chr11	77850839	77885023	34185	+	31939	NR_102280.1	KCTD21-AS1	100289388	1.14998	0.0849287	4.692	0.0365889	0.471776	up
NM_002208.4	chr17	3617919	3704537	86619	-	46049	NM_002208.4	ITGAE	3682	0.347956	5.9899	4.6897	0.0366325	0.472015	up
NM_001308420.1	chr19	50484962	50528643	43682	-	51722	NM_001308420.1	VRK3	51231	0.514409	1.96879	4.68702	0.0366831	0.472062	up
NM_005164.3	chr12	39945022	40013843	68822	-	35961	NM_005164.3	ABCD2	225	-0.394115	5.9791	4.68495	0.0367224	0.472062	down
NM_203390.2	chr8	94743728	94753224	9497	-	25147	NM_203390.2	RBM12B	389677	-0.198096	5.46334	4.68452	0.0367306	0.472062	down
NM_020665.5	chrX	15645439	15683154	37716	-	57098	NM_020665.5	TMEM27	NA	-0.600451	1.60279	4.68236	0.0367715	0.472062	down
NR_037407.1	chr13	50570551	50570637	87	-	37824	NR_037407.1	MIR3613	100500908	0.981528	-0.889321	4.6819	0.0367803	0.472062	up
NM_001258030.1	chr9	124048858	124095120	46263	+	26275	NM_001258030.1	GSN	2934	-1.26781	-0.580151	4.68158	0.0367863	0.472062	down
NM_001164093.1	chr12	6833449	6841041	7593	+	34198	NM_001164093.1	COPS7A	50813	0.871348	0.139229	4.67989	0.0368185	0.472067	up
NR_103482.1	chr17	4607525	4608824	1300	+	44450	NR_103482.1	LOC101559451	101559451	0.798445	-0.266336	4.67892	0.0368368	0.472067	up
NM_130773.3	chr2	124782864	125672954	890091	+	6781	NM_130773.3	CNTNAP5	129684	-0.605482	3.26021	4.67416	0.0369275	0.472584	down
NM_205853.3	chr3	52867131	52869235	2105	-	12024	NM_205853.3	MUSTN1	389125	-0.687588	0.050642	4.67344	0.0369413	0.472584	down
NR_120628.1	chr10	116524547	116539662	15116	+	29074	NR_120628.1	LOC101927692	101927692	0.571332	2.85995	4.67148	0.0369788	0.472584	up
NM_024859.3	chrX	49019181	49024496	5316	+	56194	NM_024859.3	MAGIX	79917	0.87483	-0.514429	4.67121	0.0369838	0.472584	up
NM_001480.3	chr18	74962008	74982098	20091	+	48026	NM_001480.3	GALR1	2587	-0.845563	1.36256	4.66954	0.0370158	0.472584	down
NM_001330518.1	chr17	79858841	79869353	10513	-	47546	NM_001330518.1	PCYT2	5833	0.39296	3.28103	4.66698	0.0370647	0.472584	up
NM_006953.3	chr22	45680868	45691755	10888	+	55152	NM_006953.3	UPK3A	7380	-1.31268	-1.00285	4.66685	0.0370673	0.472584	down
NR_026804.1	chr4	38614322	38666249	51928	-	14350	NR_026804.1	KLF3-AS1	79667	-0.444415	2.12557	4.66537	0.0370956	0.472584	down
NM_014388.6	chr1	210001312	210030910	29599	+	2589	NM_014388.6	DIEXF	NA	-0.272158	5.89606	4.66397	0.0371226	0.472584	down
NM_001166692.1	chr11	33719654	33722286	2633	-	32869	NM_001166692.1	C11orf91	100131378	0.623246	0.478092	4.66357	0.0371303	0.472584	up
NM_001243611.1	chr12	16701306	16758313	57008	-	35845	NM_001243611.1	LMO3	55885	-0.726157	0.916126	4.66069	0.0371855	0.472584	down
NM_001300866.2	chr6	76001574	76203630	202057	-	20227	NM_001300866.2	FILIP1	27145	-0.449195	3.78585	4.65856	0.0372266	0.472584	down
NM_005912.2	chr18	58038564	58040001	1438	-	48410	NM_005912.2	MC4R	4160	-1.06039	3.1331	4.65848	0.0372281	0.472584	down
NR_110303.1	chr11	94883703	94892312	8610	+	32028	NR_110303.1	LOC101929295	101929295	0.919499	-0.113063	4.65711	0.0372545	0.472584	up
NM_001323960.1	chr20	388694	391408	2715	+	52182	NM_001323960.1	RBCK1	10616	0.466071	2.33038	4.65586	0.0372785	0.472584	up
NR_047001.1	chr13	78628990	79191460	562471	+	37349	NR_047001.1	RNF219-AS1	100874222	-0.475721	3.34613	4.65299	0.0373339	0.472584	down
NM_001321177.1	chr2	135738284	135781219	42936	-	8929	NM_001321177.1	MAP3K19	80122	1.24965	-1.06237	4.74142	0.0373541	0.472584	up
NM_031430.2	chr17	1549444	1553392	3949	-	45994	NM_031430.2	RILP	83547	0.254612	5.48025	4.65152	0.0373622	0.472584	up
NM_017931.2	chr22	46663861	46689905	26045	+	55173	NM_017931.2	TTC38	55020	0.374825	5.6487	4.65075	0.0373771	0.472584	up
NM_024807.3	chr6	41157487	41168925	11439	-	19982	NM_024807.3	TREML2	79865	1.35429	-0.979653	4.65068	0.0373786	0.472584	up
NR_002578.2	chr1	173833039	173837125	4087	-	5152	NR_002578.2	GAS5	60674	0.41577	3.24444	4.64832	0.0374242	0.472686	up
NM_178001.2	chr9	131873593	131911225	37633	+	26464	NM_178001.2	PTPA	5524	-1.33478	-1.24151	4.64767	0.0374367	0.472686	down
NR_037498.1	chr6	33665905	33666011	107	+	18365	NR_037498.1	MIR3934	100500873	-1.12987	-1.04023	4.63965	0.0375925	0.474335	down
NR_105018.1	chr5	86415965	86543838	127874	+	15718	NR_105018.1	LOC101929380	101929380	0.991622	-0.120018	4.63539	0.0376754	0.474562	up
NM_206965.1	chr21	47556693	47575481	18789	-	54563	NM_206965.1	FTCD	10841	-1.36619	-1.22946	4.63391	0.0377042	0.474562	down
NM_001164442.1	chr5	63986135	64014017	27883	+	15520	NM_001164442.1	FAM159B	NA	0.814764	0.421315	4.63355	0.0377114	0.474562	up
NM_022567.2	chrX	41306713	41334905	28193	+	56082	NM_022567.2	NYX	60506	1.4654	-1.13611	4.63352	0.0377119	0.474562	up
NM_025195.3	chr8	126442563	126450647	8085	+	24363	NM_025195.3	TRIB1	10221	-0.452143	3.30215	4.63227	0.0377364	0.474562	down
NR_015381.1	chr7	86954663	86974808	20146	-	22897	NR_015381.1	TP53TG1	11257	0.243272	5.12491	4.63098	0.0377616	0.474562	up
NR_015362.1	chr6	94416801	94486199	69399	+	18810	NR_015362.1	TSG1	643432	-1.11433	-0.932516	4.62867	0.0378066	0.474812	down
NM_005026.3	chr1	9711790	9789172	77383	+	159	NM_005026.3	PIK3CD	5293	0.431481	5.15063	4.62257	0.0379263	0.475998	up
NM_004716.3	chr11	117075787	117103241	27455	-	33831	NM_004716.3	PCSK7	9159	0.285445	6.05153	4.61738	0.0380284	0.476905	up
NM_153033.4	chr7	66093868	66108216	14349	+	21407	NM_153033.4	KCTD7	154881	-0.332657	4.02645	4.61441	0.038087	0.476905	down
NM_032479.3	chr5	1798499	1799956	1458	-	16646	NM_032479.3	MRPL36	64979	0.276539	4.66317	4.61414	0.0380922	0.476905	up
NM_005508.4	chr3	32993066	32996403	3338	+	10007	NM_005508.4	CCR4	1233	-1.2869	-1.30939	4.61376	0.0380997	0.476905	down
NR_133633.1	chr1	54387234	54411496	24263	-	3953	NR_133633.1	HSPB11	51668	-1.33164	-1.20526	4.60805	0.0382128	0.478002	down
NM_001282446.1	chr7	39605975	39651688	45714	+	21230	NM_001282446.1	YAE1D1	NA	-0.395938	2.40065	4.60426	0.0382878	0.478409	down
NM_005346.4	chr6	31795512	31798031	2520	+	18281	NM_005346.4	HSPA1B	3304	0.956631	8.76936	4.60377	0.0382976	0.478409	up
NM_002472.2	chr17	10293642	10325267	31626	-	46293	NM_002472.2	MYH8	4626	-1.26959	-1.25859	4.60241	0.0383245	0.478409	down
NM_000786.3	chr7	91741463	91763840	22378	-	22915	NM_000786.3	CYP51A1	1595	-0.500012	3.41911	4.60127	0.0383473	0.478409	down
NM_001195291.2	chr6	2948393	2972399	24007	-	19369	NM_001195291.2	SERPINB6	5269	-1.14751	-0.72109	4.59951	0.0383823	0.478409	down
NM_015206.2	chr15	79724858	79764642	39785	+	40792	NM_015206.2	KIAA1024	NA	-0.582671	2.45014	4.59874	0.0383976	0.478409	down
NR_038988.1	chrX	102024095	102140338	116244	+	56523	NR_038988.1	LINC00630	100287765	-0.474717	2.58383	4.59128	0.0385463	0.479945	down
NM_003945.3	chr5	172410763	172461900	51138	+	16476	NM_003945.3	ATP6V0E1	8992	0.351184	7.80969	4.58973	0.0385773	0.480014	up
NM_022054.3	chr14	90528109	90652201	124093	+	38779	NM_022054.3	KCNK13	56659	0.616091	2.65268	4.58599	0.0386523	0.480206	up
NR_046438.2	chr2	66650474	66660602	10129	-	8325	NR_046438.2	MEIS1-AS3	730198	-1.24531	-0.28013	4.58544	0.0386633	0.480206	down
NR_134647.1	chr18	70536275	70548634	12360	+	48005	NR_134647.1	LOC100505797	100505797	0.796384	1.26256	4.58281	0.0387162	0.480206	up
NM_020167.4	chr5	151771102	151784840	13739	-	17602	NM_020167.4	NMUR2	56923	1.10034	0.440605	4.58255	0.0387215	0.480206	up
NM_020956.2	chr19	40899671	40919271	19601	-	51335	NM_020956.2	PRX	57716	1.00167	-0.237034	4.58064	0.0387598	0.480206	up
NR_104176.1	chr19	36279778	36288811	9034	-	51160	NR_104176.1	LINC01529	644050	0.966166	-0.301517	4.58014	0.0387698	0.480206	up
NR_110665.1	chr1	64571005	64579474	8470	-	4025	NR_110665.1	ROR1-AS1	101927034	1.23267	-0.939813	4.58008	0.0387711	0.480206	up
NR_104586.1	chr13	111545039	111567454	22416	-	38082	NR_104586.1	ANKRD10	55608	-0.773222	0.234259	4.57223	0.0389294	0.48185	down
NR_111909.1	chr10	68772024	68861309	89286	+	28424	NR_111909.1	LRRTM3	347731	-1.25815	-1.28756	4.57013	0.0389717	0.482058	down
NM_032549.3	chr7	110303106	111202347	899242	-	23191	NM_032549.3	IMMP2L	83943	1.07865	-0.765024	4.56642	0.039047	0.482193	up
NM_001243212.1	chr19	39399620	39402798	3179	-	51290	NM_001243212.1	CCER2	643669	-0.534519	1.8818	4.56554	0.0390647	0.482193	down
NM_139178.3	chr11	43902357	43941825	39469	+	31148	NM_139178.3	ALKBH3	221120	0.273398	4.80644	4.56538	0.0390681	0.482193	up
NM_030961.2	chr7	100728720	100735019	6300	+	21769	NM_030961.2	TRIM56	81844	0.567883	6.11454	4.56435	0.0390889	0.482193	up
NM_000262.2	chr22	42454338	42466846	12509	-	55715	NM_000262.2	NAGA	4668	0.340689	6.07336	4.56329	0.0391106	0.482193	up
NR_109992.1	chr3	67705121	67998137	293017	+	10469	NR_109992.1	SUCLG2-AS1	101927111	1.17396	0.58938	4.56123	0.0391524	0.482394	up
NR_030345.1	chr12	13068763	13068852	90	+	34357	NR_030345.1	MIR614	693199	1.47018	-1.28881	4.55632	0.0392523	0.483208	up
NM_153687.3	chr12	99018030	99038829	20800	-	36633	NM_153687.3	IKBIP	121457	0.612942	2.87802	4.55546	0.0392698	0.483208	up
NM_001326345.1	chr10	11060719	11373418	312700	+	27963	NM_001326345.1	CELF2	10659	1.38219	-1.35124	4.63876	0.0393267	0.483593	up
NM_138720.2	chr6	26158349	26171577	13229	+	18030	NM_138720.2	HIST1H2BD	3017	0.483669	3.08783	4.5508	0.0393651	0.483749	up
NM_004158.3	chr19	6375159	6375927	769	-	50611	NM_004158.3	PSPN	5623	0.726698	1.27928	4.54556	0.0394725	0.484494	up
NM_020162.3	chr17	5344232	5372380	28149	-	46116	NM_020162.3	DHX33	56919	-1.2846	-1.22381	4.54462	0.0394917	0.484494	down
NR_034136.1	chr4	3675320	3679582	4263	-	14193	NR_034136.1	LOC100133461	NA	1.21099	-1.22449	4.54408	0.0395028	0.484494	up
NM_005373.2	chr1	43803475	43820135	16661	+	794	NM_005373.2	MPL	4352	0.407258	3.17491	4.54242	0.0395369	0.484597	up
NM_021110.3	chr8	121137347	121385814	248468	+	24331	NM_021110.3	COL14A1	7373	-0.577536	4.5263	4.5376	0.0396362	0.485498	down
NR_120682.1	chr8	144362325	144363870	1546	-	25478	NR_120682.1	MINCR	100507316	0.601563	1.72739	4.53398	0.0397109	0.486019	up
NM_004370.5	chr6	75794042	75915623	121582	-	20221	NM_004370.5	COL12A1	1303	-0.774412	0.0562909	4.53304	0.0397303	0.486019	down
NM_133259.3	chr2	44113363	44223144	109782	-	8172	NM_133259.3	LRPPRC	10128	-0.27896	8.56265	4.52914	0.0398109	0.486636	down
NM_006914.3	chr9	77112252	77302117	189866	+	25938	NM_006914.3	RORB	6096	-0.42329	5.23462	4.52805	0.0398337	0.486636	down
NM_032683.2	chr19	18304040	18307552	3513	+	49065	NM_032683.2	MPV17L2	84769	0.244565	5.11405	4.52687	0.0398581	0.486636	up
NR_000016.1	chr9	136217701	136217768	68	+	26553	NR_000016.1	SNORD36C	26813	1.27351	-1.32761	4.52055	0.0399893	0.487745	up
NM_031914.2	chr14	62462541	62568427	105887	+	38514	NM_031914.2	SYT16	83851	-0.804392	3.63166	4.52	0.0400007	0.487745	down
NM_002667.4	chr6	118869426	118882878	13453	+	18944	NM_002667.4	PLN	5350	-0.736526	3.95911	4.51865	0.040029	0.487774	down
NM_001287750.1	chr8	11665926	11696818	30893	+	23648	NM_001287750.1	FDFT1	2222	0.385376	3.30671	4.51223	0.0401629	0.488777	up
NM_001144881.1	chr12	42852140	42877416	25277	-	35974	NM_001144881.1	PRICKLE1	144165	-1.26279	-1.3299	4.51222	0.0401631	0.488777	down
NM_021632.3	chr19	52467593	52490079	22487	-	51856	NM_021632.3	ZNF350	59348	0.476494	4.85534	4.50845	0.0402422	0.489158	up
NR_110153.1	chr2	8819939	8821991	2053	-	7820	NR_110153.1	ID2-AS1	100506299	0.586394	0.905957	4.50824	0.0402464	0.489158	up
NM_031212.3	chr10	101370275	101380221	9947	-	30273	NM_031212.3	SLC25A28	81894	0.241683	7.19084	4.50606	0.0402922	0.489399	up
NM_015058.1	chr13	42140961	42535221	394261	-	37727	NM_015058.1	VWA8	23078	-0.296481	5.81737	4.50293	0.040358	0.489709	down
NR_109846.1	chr1	111196182	111214397	18216	-	4319	NR_109846.1	KCNA3	3738	-1.10433	-0.182361	4.50237	0.0403697	0.489709	down
NR_027285.1	chr1	213029946	213031480	1535	-	5470	NR_027285.1	FLVCR1-AS1	NA	0.803364	-0.237018	4.49779	0.0404661	0.490336	up
NR_037141.1	chr6	42695314	42695932	619	+	18487	NR_037141.1	ATP6V0CP3	442211	0.979217	-0.42213	4.49745	0.0404733	0.490336	up
NM_003956.3	chr10	90965694	90967071	1378	-	30107	NM_003956.3	CH25H	9023	0.811003	3.17011	4.49581	0.0405079	0.49044	up
NM_001257102.1	chr2	201936462	201950473	14012	+	7266	NM_001257102.1	NDUFB3	4709	1.28476	-1.25484	4.49441	0.0405374	0.490482	up
NM_002087.3	chr17	42422454	42430474	8021	+	45211	NM_002087.3	GRN	2896	0.304237	7.88761	4.49169	0.040595	0.490581	up
NM_001567.3	chr11	71935882	71950191	14310	+	31840	NM_001567.3	INPPL1	3636	0.353306	7.77124	4.49157	0.0405976	0.490581	up
NR_045555.1	chr8	120569317	120605248	35932	-	25301	NR_045555.1	ENPP2	5168	1.36575	-1.18053	4.57297	0.0406512	0.490846	up
NM_032189.3	chr13	113344643	113541482	196840	+	37486	NM_032189.3	ATP11A	23250	-1.09013	-1.38166	4.57164	0.0406785	0.490846	down
NM_001242854.1	chr11	6495913	6502709	6797	-	32615	NM_001242854.1	ARFIP2	23647	1.26319	-1.25268	4.48684	0.0406977	0.490846	up
NM_181726.3	chr4	186317840	186321399	3560	+	14111	NM_181726.3	ANKRD37	353322	0.494917	4.31341	4.48293	0.0407808	0.491534	up
NM_005440.4	chr17	41177258	41184058	6801	+	45161	NM_005440.4	RND2	8153	0.31553	8.62596	4.47832	0.040879	0.492402	up
NR_045620.1	chr15	41679547	41694658	15112	-	41218	NR_045620.1	NDUFAF1	51103	0.811212	-0.111076	4.47426	0.0409657	0.492931	up
NR_002821.2	chr22	38740670	38794931	54262	-	55636	NR_002821.2	LOC400927	NA	0.647153	-0.282618	4.47382	0.0409751	0.492931	up
NM_001172223.2	chr11	1490678	1508009	17332	-	32471	NM_001172223.2	MOB2	81532	-1.14967	-1.21674	4.47257	0.0410018	0.492937	down
NM_018438.5	chr1	11724150	11734411	10262	+	202	NM_018438.5	FBXO6	26270	0.201153	5.20491	4.46936	0.0410706	0.493449	up
NR_125957.1	chr1	562760	564389	1630	-	2995	NR_125957.1	LOC101928626	101928626	0.959999	3.71237	4.467	0.0411212	0.493743	up
NM_005954.2	chr16	56623267	56625000	1734	+	42803	NM_005954.2	MT3	4504	0.375218	11.0143	4.46489	0.0411665	0.493971	up
NM_001130992.1	chr3	139245247	139258671	13425	-	12555	NM_001130992.1	RBP1	5947	-0.48445	2.07351	4.46142	0.0412411	0.494468	down
NM_002612.3	chr7	95212809	95225925	13117	-	22973	NM_002612.3	PDK4	5166	0.518853	8.5533	4.46052	0.0412604	0.494468	up
NM_000998.4	chr2	217363520	217366190	2671	+	7424	NM_000998.4	RPL37A	6168	0.231994	8.89747	4.45685	0.0413397	0.494713	up
NM_002817.3	chr11	236808	252984	16177	+	30665	NM_002817.3	PSMD13	5719	-1.28361	-1.29603	4.45597	0.0413585	0.494713	down
NM_015714.3	chr1	209848670	209849735	1066	+	2580	NM_015714.3	G0S2	50486	0.708075	3.19633	4.4546	0.0413883	0.494713	up
NM_001168214.1	chr3	159943423	159946000	2578	+	11123	NM_001168214.1	C3orf80	401097	-0.75495	2.36222	4.45143	0.0414568	0.494713	down
NM_014015.3	chr16	11022748	11036257	13510	-	43637	NM_014015.3	DEXI	28955	0.276092	7.4231	4.44898	0.0415098	0.494713	up
NM_001142504.2	chrX	67913482	67945684	32203	+	56330	NM_001142504.2	STARD8	9754	1.22639	-0.238893	4.44894	0.0415108	0.494713	up
NR_034135.1	chr2	8147901	8468549	320649	-	7817	NR_034135.1	LINC00299	339789	0.696541	1.08373	4.44644	0.0415649	0.494713	up
NR_049735.2	chr14	36604916	36645857	40942	-	39369	NR_049735.2	PTCSC3	100886964	-1.28211	-0.909539	4.44439	0.0416094	0.494713	down
NR_036060.1	chr1	67094123	67094200	78	+	1106	NR_036060.1	MIR3117	100422871	-1.23252	-1.28797	4.44401	0.0416178	0.494713	down
NR_125824.1	chr8	41391824	41435887	44064	-	24839	NR_125824.1	LOC102723729	102723729	1.09808	-0.842942	4.44391	0.0416199	0.494713	up
NM_003950.3	chr19	16999671	17003411	3741	+	49013	NM_003950.3	F2RL3	9002	1.25674	-0.363063	4.44345	0.0416299	0.494713	up
NR_125892.1	chr4	4763487	4789101	25615	+	13149	NR_125892.1	LOC101928279	101928279	-0.485296	0.726812	4.44318	0.0416358	0.494713	down
NR_103464.1	chr10	14880159	14888998	8840	+	27992	NR_103464.1	HSPA14	51182	-0.378634	2.00475	4.44146	0.0416732	0.494713	down
NM_001286810.1	chr9	37800551	37867666	67116	+	25864	NM_001286810.1	DCAF10	79269	1.22346	-1.38339	4.546	0.0416877	0.494713	up
NM_001271805.1	chrX	54959567	55024967	65401	-	57379	NM_001271805.1	PFKFB1	5207	1.26377	-1.38311	5.13193	0.0416877	0.494713	up
NM_001160301.1	chr1	98185314	98386615	201302	-	4223	NM_001160301.1	DPYD	1806	0.587479	0.0085947	4.43913	0.0417241	0.494713	up
NR_125831.1	chr6	39856566	39865156	8591	-	19955	NR_125831.1	LOC100505635	100505635	-1.12297	-0.70619	4.439	0.0417269	0.494713	down
NR_138045.1	chrY	8506335	8513170	6836	+	58140	NR_138045.1	LINC00279	100873963	-1.41786	-1.13056	4.43777	0.0417536	0.494719	down
NR_003080.1	chr14	101364257	101364333	77	+	38925	NR_003080.1	SNORD112	692215	1.24989	-1.2321	4.4345	0.0418252	0.49522	up
NM_001010883.2	chr1	109102971	109181949	78979	+	1391	NM_001010883.2	FAM102B	284611	-0.512806	5.91275	4.43343	0.0418484	0.49522	down
NM_002984.3	chr17	34431220	34433014	1795	+	44977	NM_002984.3	CCL4	6351	1.22792	1.09567	4.43207	0.0418783	0.495262	up
NM_133445.2	chr9	104331634	104500862	169229	-	27309	NM_133445.2	GRIN3A	116443	-0.872002	2.78531	4.42949	0.0419348	0.49562	down
NM_022497.4	chr3	15090019	15106844	16826	-	11537	NM_022497.4	MRPS25	64432	-0.44589	1.07734	4.42626	0.0420057	0.496147	down
NM_016239.3	chr17	18012020	18083116	71097	+	44758	NM_016239.3	MYO15A	51168	-0.593834	1.01782	4.42461	0.042042	0.496264	down
NM_012288.3	chr6	52362200	52441862	79663	-	20127	NM_012288.3	TRAM2	9697	0.455556	4.95371	4.42252	0.0420879	0.496294	up
NM_001008237.2	chr2	20096392	20101747	5356	-	7903	NM_001008237.2	TTC32	130502	0.456597	3.7213	4.4219	0.0421016	0.496294	up
NM_022831.2	chr1	222841355	222885864	44510	-	5527	NM_022831.2	AIDA	64853	0.367015	4.5457	4.4209	0.0421235	0.496294	up
NR_038277.1	chr10	54056608	54073888	17281	-	29787	NR_038277.1	PRKG1-AS1	100506939	1.31828	-1.09668	4.41347	0.0422877	0.497918	up
NM_001321217.1	chr17	19244234	19266051	21818	-	46420	NM_001321217.1	B9D1	27077	-0.371954	3.22569	4.40419	0.0424934	0.500003	down
NM_001128922.1	chr11	76368568	76381791	13224	-	33494	NM_001128922.1	LRRC32	2615	0.880699	-0.465446	4.40309	0.0425179	0.500003	up
NM_006477.4	chr22	29708922	29711745	2824	-	55448	NM_006477.4	RASL10A	10633	-0.367065	6.23797	4.40146	0.0425542	0.500091	down
NM_153701.2	chr19	18181372	18197813	16442	-	50972	NM_153701.2	IL12RB1	3594	0.991053	-0.0752487	4.40038	0.0425784	0.500091	up
NM_003032.2	chr3	186739665	186796341	56677	+	11307	NM_003032.2	ST6GAL1	6480	1.40076	-1.14414	4.39732	0.0426466	0.500377	up
NM_173812.4	chr12	63952693	64062354	109662	-	36406	NM_173812.4	DPY19L2	283417	-0.482874	2.13375	4.39691	0.0426559	0.500377	down
NM_015177.1	chr11	58939812	58976060	36249	+	31407	NM_015177.1	DTX4	23220	-0.530662	1.80045	4.39271	0.0427498	0.501167	down
NM_014978.2	chr10	106400859	107025000	624142	+	29000	NM_014978.2	SORCS3	22986	-0.736389	5.89132	4.38838	0.0428468	0.501992	down
NM_025244.2	chr2	99613724	99771187	157464	-	8636	NM_025244.2	TSGA10	80705	0.666223	-0.0256929	4.38365	0.042953	0.502924	up
NM_033225.5	chr8	2792875	4852328	2059454	-	24521	NM_033225.5	CSMD1	64478	-0.542164	5.31604	4.37877	0.0430632	0.503901	down
NR_031736.1	chr10	21785491	21785570	80	-	29428	NR_031736.1	MIR1915	100302129	-1.33964	-1.28454	4.37681	0.0431074	0.504105	down
NM_001323890.1	chr4	57204450	57253674	49225	-	14455	NM_001323890.1	AASDH	132949	1.15724	-1.28177	4.37316	0.0431899	0.504756	up
NM_153836.3	chr2	101964816	102003965	39150	-	8666	NM_153836.3	CREG2	200407	-0.532685	4.83414	4.37005	0.0432605	0.505268	down
NM_017957.2	chr17	48610048	48621111	11064	+	45387	NM_017957.2	EPN3	55040	0.861005	0.748115	4.36538	0.0433665	0.50602	up
NM_001424.5	chr16	10622279	10674573	52295	-	43627	NM_001424.5	EMP2	2013	0.603623	7.66962	4.36385	0.0434015	0.50602	up
NM_002231.3	chr11	44587141	44641339	54199	+	31158	NM_002231.3	CD82	3732	1.26043	-1.1288	4.36368	0.0434053	0.50602	up
NM_004962.4	chr10	48425779	48439138	13360	-	29684	NM_004962.4	GDF10	2662	0.60725	5.80935	4.3607	0.0434731	0.506448	up
NM_000681.3	chr10	112836790	112840665	3876	+	29027	NM_000681.3	ADRA2A	150	-0.670303	2.72657	4.35971	0.0434958	0.506448	down
NM_170783.3	chr6	30029017	30032686	3670	+	18159	NM_170783.3	ZNRD1	30834	1.20652	-1.38815	4.66426	0.0435532	0.506803	up
NM_001033557.2	chr2	44395942	44458612	62671	+	6106	NM_001033557.2	PPM1B	5495	-0.572254	1.00574	4.35294	0.0436504	0.507622	down
NM_001105576.2	chrX	118892576	118894165	1590	+	56695	NM_001105576.2	SOWAHD	347454	0.579095	0.953044	4.34822	0.0437588	0.508092	up
NR_038355.1	chr14	80677762	80921810	244049	+	38717	NR_038355.1	DIO2-AS1	100628307	-1.32296	-1.25391	4.34742	0.0437771	0.508092	down
NM_001270370.1	chr10	81838402	81852307	13906	+	28631	NM_001270370.1	TMEM254	80195	1.19689	-1.21728	4.34408	0.043854	0.508092	up
NR_027063.1	chr2	110969106	110980517	11412	-	8748	NR_027063.1	LINC00116	NA	0.362263	5.99668	4.3433	0.043872	0.508092	up
NM_002661.4	chr16	81812863	81996298	183436	+	43186	NM_002661.4	PLCG2	5336	0.562435	5.35455	4.34281	0.0438833	0.508092	up
NM_032110.2	chr1	50883223	50889119	5897	-	3895	NM_032110.2	DMRTA2	63950	-0.949095	0.296179	4.34222	0.0438968	0.508092	down
NM_014398.3	chr3	182840003	182880667	40665	-	12821	NM_014398.3	LAMP3	27074	0.87073	-0.246549	4.34194	0.0439034	0.508092	up
NM_032947.4	chr5	150157508	150176298	18791	+	16321	NM_032947.4	SMIM3	85027	0.530044	5.79312	4.3418	0.0439065	0.508092	up
NM_014494.2	chr16	24741049	24837548	96500	+	42506	NM_014494.2	TNRC6A	27327	-1.09733	-1.34149	4.41883	0.0439521	0.508308	down
NR_026998.1	chr15	78285575	78286567	993	-	41762	NR_026998.1	LOC91450	91450	1.04436	-0.563335	4.33499	0.0440638	0.508832	up
NR_039624.1	chr1	192685458	192685520	63	+	2366	NR_039624.1	MIR4426	100616345	0.269179	5.80458	4.33375	0.0440927	0.508832	up
NM_001060.5	chr19	3594504	3606831	12328	-	50525	NM_001060.5	TBXA2R	6915	0.806832	0.666751	4.33325	0.0441041	0.508832	up
NR_046371.1	chr3	148880197	148939832	59636	-	12603	NR_046371.1	CP	1356	1.16701	1.44155	4.3332	0.0441055	0.508832	up
NR_029405.1	chr20	5451842	5457780	5939	+	52304	NR_029405.1	LOC643406	643406	1.29655	-1.25223	4.33139	0.0441474	0.509005	up
NM_005592.3	chr9	113431051	113563278	132228	+	26198	NM_005592.3	MUSK	4593	1.53206	-0.448508	4.40325	0.0443019	0.510473	up
NM_000154.1	chr17	73754018	73761280	7263	-	47387	NM_000154.1	GALK1	2584	0.247098	4.78434	4.32306	0.0443411	0.510613	up
NM_001195279.1	chr3	12581280	12586963	5684	-	11506	NM_001195279.1	MKRN2OS	100129480	0.70691	1.74866	4.32037	0.0444039	0.511024	up
NR_038925.1	chr8	143783670	143808391	24722	-	25462	NR_038925.1	LOC100288181	NA	-0.374294	3.85619	4.31816	0.0444554	0.511281	down
NR_132761.1	chr4	184719175	184944683	225509	+	14088	NR_132761.1	STOX2	56977	-1.10764	-1.00693	4.31709	0.0444805	0.511281	down
NM_001277764.1	chr15	90773477	90777279	3803	-	41934	NM_001277764.1	CIB1	10519	-1.1304	-1.25088	4.39772	0.0445166	0.511385	down
NM_032109.2	chr5	76924537	76934522	9986	-	17012	NM_032109.2	OTP	23440	1.624	-0.999157	4.30097	0.0448591	0.514402	up
NM_002360.3	chr7	1570368	1582679	12312	+	20890	NM_002360.3	MAFK	7975	0.508894	6.89692	4.30039	0.0448728	0.514402	up
NM_001007.4	chrX	71492453	71497141	4689	-	57478	NM_001007.4	RPS4X	6191	0.227249	9.52335	4.30029	0.0448752	0.514402	up
NM_001319657.1	chr11	69240439	69244389	3951	+	31779	NM_001319657.1	LOC102724265	102724265	0.780695	1.45244	4.29973	0.0448884	0.514402	up
NR_110532.1	chr3	37831581	37903271	71691	-	11675	NR_110532.1	ITGA9-AS1	101928153	-0.733646	0.96058	4.29733	0.0449453	0.514505	down
NM_014077.3	chr19	16296212	16302857	6646	+	49000	NM_014077.3	FAM32A	26017	0.172583	7.4239	4.29705	0.0449519	0.514505	up
NM_016535.3	chr19	56154986	56156989	2004	+	50263	NM_016535.3	ZNF581	51545	0.270529	4.6014	4.29286	0.045051	0.514801	up
NM_001318918.1	chr16	4364762	4389598	24837	+	42276	NM_001318918.1	GLIS2	84662	1.11597	-1.20779	4.29258	0.0450576	0.514801	up
NM_001080452.1	chr19	6729925	6737633	7709	-	50634	NM_001080452.1	GPR108	56927	0.217853	7.20859	4.29159	0.0450812	0.514801	up
NR_026943.1	chr21	46707967	46717269	9303	+	54172	NR_026943.1	LOC642852	NA	-0.395608	5.93152	4.29134	0.0450871	0.514801	down
NM_014465.3	chr4	70592686	70626430	33745	-	14521	NM_014465.3	SULT1B1	27284	0.865101	1.24621	4.28619	0.0452097	0.515413	up
NM_005730.3	chr12	58213710	58240747	27038	-	36396	NM_005730.3	CTDSP2	10106	0.296443	8.77725	4.28541	0.0452282	0.515413	up
NM_001690.3	chr3	113465866	113530905	65040	+	10716	NM_001690.3	ATP6V1A	523	-0.384694	8.68018	4.28459	0.0452478	0.515413	down
NM_001009608.2	chr20	10415951	10608682	192732	+	52350	NM_001009608.2	SLX4IP	128710	-0.197318	4.88019	4.28449	0.04525	0.515413	down
NM_207321.2	chr10	96953957	96988686	34730	+	28813	NM_207321.2	ACSM6	142827	-1.32962	-1.2673	4.28332	0.0452779	0.515419	down
NM_018933.3	chr5	140593491	140596993	3503	+	16181	NM_018933.3	PCDHB13	56123	-0.36383	3.09585	4.27722	0.0454237	0.516631	down
NR_027069.1	chr2	63271057	63274846	3790	-	8305	NR_027069.1	LOC100132215	100132215	-1.22653	-1.22295	4.27646	0.0454418	0.516631	down
NM_177998.1	chr4	4190530	4228621	38092	-	14197	NM_177998.1	OTOP1	133060	-1.21671	-1.31316	4.35206	0.0454732	0.516631	down
NM_001144874.1	chr11	125703211	125709967	6757	+	32338	NM_001144874.1	PATE4	399968	-1.24762	-1.32064	4.27428	0.045494	0.516631	down
NM_024870.3	chr8	68864350	69149268	284919	+	24108	NM_024870.3	PREX2	80243	-0.375892	8.48178	4.2727	0.0455321	0.516753	down
NM_001711.5	chrX	152760347	152775012	14666	+	56914	NM_001711.5	BGN	633	0.417098	8.75037	4.27058	0.045583	0.517019	up
NM_001010926.3	chr1	2460184	2461684	1501	-	3101	NM_001010926.3	HES5	388585	-0.662326	4.37845	4.26541	0.0457075	0.518034	down
NM_014648.3	chr3	108308337	108413693	105357	+	10654	NM_014648.3	DZIP3	9666	-0.31178	7.3808	4.26402	0.0457409	0.518034	down
NM_001171931.1	chr10	73156691	73467267	310577	+	28521	NM_001171931.1	CDH23	64072	0.771477	0.388634	4.25853	0.0458735	0.518034	up
NM_014452.4	chr6	47199263	47277683	78421	-	20097	NM_014452.4	TNFRSF21	27242	-0.303845	7.09729	4.25785	0.04589	0.518034	down
NM_001134493.1	chr6	41755181	41757634	2454	+	18479	NM_001134493.1	TOMM6	100188893	0.202787	7.3388	4.25725	0.0459044	0.518034	up
NM_006145.2	chr19	14625576	14629371	3796	-	50897	NM_006145.2	DNAJB1	3337	0.681681	4.4469	4.25468	0.0459667	0.518034	up
NM_001080432.2	chr16	53737875	54148379	410505	+	42773	NM_001080432.2	FTO	79068	-0.288377	8.81532	4.25301	0.0460072	0.518034	down
NR_046638.1	chrX	24668190	24676354	8165	+	56022	NR_046638.1	PCYT1B-AS1	100874088	1.14643	-1.39118	4.32861	0.0460213	0.518034	up
NM_001077351.1	chr14	23369854	23388396	18543	-	39205	NM_001077351.1	RBM23	55147	1.24766	-1.4479	5.56473	0.0460316	0.518034	up
NM_002419.3	chr11	65365226	65381720	16495	-	33281	NM_002419.3	MAP3K11	4296	0.395276	7.99209	4.2519	0.0460342	0.518034	up
NM_016406.3	chr1	161123534	161128646	5113	+	2058	NM_016406.3	UFC1	51506	0.194147	8.11521	4.25165	0.0460403	0.518034	up
NM_001029869.1	chr5	145463876	145483946	20071	-	17507	NM_001029869.1	PLAC8L1	153770	-0.768827	0.469159	4.25159	0.0460417	0.518034	down
NM_004615.3	chrX	38420731	38548172	127442	+	56064	NM_004615.3	TSPAN7	7102	-0.408394	11.471	4.24883	0.0461087	0.518034	down
NR_135490.1	chr2	25455830	25565459	109630	-	7958	NR_135490.1	DNMT3A	1788	-1.24801	-1.30651	4.24858	0.0461149	0.518034	down
NM_000733.3	chr11	118175295	118186890	11596	+	32192	NM_000733.3	CD3E	916	-0.794403	1.15915	4.24767	0.0461371	0.518034	down
NR_134238.1	chr4	89206082	89262809	56728	+	13652	NR_134238.1	LOC105369192	NA	1.19283	0.319171	4.24718	0.0461491	0.518034	up
NR_034085.1	chr5	43016150	43018913	2764	-	16828	NR_034085.1	LOC648987	648987	0.790362	0.451608	4.24582	0.0461821	0.518034	up
NM_003821.5	chr8	90769975	90803292	33318	+	24183	NM_003821.5	RIPK2	8767	0.364097	4.77446	4.24532	0.0461942	0.518034	up
NR_024608.1	chrX	98716600	99194841	478242	-	57564	NR_024608.1	XRCC6P5	442459	1.03942	-1.35053	4.4654	0.0461946	0.518034	up
NM_004380.2	chr16	3775055	3930121	155067	-	43547	NM_004380.2	CREBBP	1387	-1.11801	-1.09992	4.24343	0.0462404	0.518239	down
NM_001243423.1	chr6	17950637	17987854	37218	-	19495	NM_001243423.1	KIF13A	63971	0.454446	2.77301	4.24225	0.0462692	0.518254	up
NR_110118.1	chr3	633788	887698	253911	+	9756	NR_110118.1	LINC01266	101927215	-0.605935	0.835723	4.23992	0.0463261	0.518448	down
NR_109940.1	chr5	88185125	88237187	52063	+	15729	NR_109940.1	MEF2C-AS1	101929423	-1.1624	-1.25445	4.23678	0.046403	0.518448	down
NR_135616.1	chrX	41134992	41136031	1040	+	56076	NR_135616.1	LOC105373185	NA	-0.540859	0.227962	4.2367	0.0464049	0.518448	down
NM_005990.3	chr5	171469074	171615346	146273	-	17692	NM_005990.3	STK10	6793	0.354211	5.30721	4.23556	0.0464329	0.518448	up
NR_120661.1	chr10	82289353	82295698	6346	-	30069	NR_120661.1	LOC101929574	101929574	0.751689	0.18505	4.23446	0.0464599	0.518448	up
NM_005188.3	chr11	119076986	119178859	101874	+	32256	NM_005188.3	CBL	867	-0.171481	7.48637	4.23268	0.0465037	0.518448	down
NM_015124.4	chr22	47016299	47075688	59390	+	55182	NM_015124.4	GRAMD4	23151	-0.324736	7.07008	4.23238	0.046511	0.518448	down
NM_001131055.1	chr5	175085040	175113245	28206	+	16505	NM_001131055.1	HRH2	3274	-0.890197	-0.291173	4.23235	0.0465117	0.518448	down
NR_046661.1	chr13	113399763	113409045	9283	-	38093	NR_046661.1	ATP11A-AS1	100874205	0.989218	-0.0220897	4.22878	0.0465994	0.518448	up
NM_001083602.1	chr9	98205264	98279247	73984	-	27246	NM_001083602.1	PTCH1	5727	-1.23993	-1.39184	4.24719	0.0466681	0.518448	down
NM_178238.3	chr7	99955626	99965454	9829	+	21729	NM_178238.3	PILRB	29990	1.34876	-0.422928	4.22541	0.0466826	0.518448	up
NR_046464.1	chr14	101292445	101327363	34919	+	38906	NR_046464.1	MEG3	55384	-1.22337	-1.39237	4.22514	0.0466891	0.518448	down
NM_006669.6	chr19	55128384	55149007	20624	+	50200	NM_006669.6	LILRB1	10859	1.41429	-0.708855	4.22483	0.0466969	0.518448	up
NM_001013659.2	chr19	37997841	38034239	36399	+	49488	NM_001013659.2	ZNF793	390927	-0.26591	4.90884	4.22429	0.0467102	0.518448	down
NM_001256686.1	chr11	11373489	11374904	1416	-	32700	NM_001256686.1	CSNK2A3	283106	-0.266955	6.07195	4.22427	0.0467105	0.518448	down
NM_001258329.1	chr20	34680632	34820721	140090	+	52593	NM_001258329.1	EPB41L1	2036	1.13532	-1.35881	4.65784	0.0467963	0.518448	up
NM_001032999.2	chr20	32077928	32237837	159910	+	52539	NM_001032999.2	CBFA2T2	9139	-0.869296	-0.857342	4.22069	0.0467991	0.518448	down
NM_024021.3	chr11	60048014	60076445	28432	+	31425	NM_024021.3	MS4A4A	51338	1.3114	-1.33972	4.29419	0.0468391	0.518448	up
NM_052893.1	chr6	38136227	38607924	471698	-	19939	NM_052893.1	BTBD9	114781	-0.942238	-0.842649	4.21791	0.0468678	0.518448	down
NR_037889.1	chr5	158758526	158789842	31317	+	16387	NR_037889.1	LOC285626	285626	-1.37997	-1.1203	4.21723	0.0468848	0.518448	down
NR_103998.1	chr1	150039725	150117505	77781	+	1655	NR_103998.1	VPS45	11311	-1.12629	-1.12909	4.21691	0.0468926	0.518448	down
NR_125376.1	chr15	45021186	45025049	3864	+	40356	NR_125376.1	LOC100419583	100419583	0.228613	7.47602	4.21581	0.04692	0.518448	up
NM_052862.3	chr1	167599474	167675486	76013	+	2155	NM_052862.3	RCSD1	92241	-0.939483	-1.34899	4.31589	0.0469229	0.518448	down
NR_107022.1	chr8	6479645	6479741	97	-	24527	NR_107022.1	MIR8055	102465861	-1.16495	-1.33695	4.21473	0.0469466	0.518448	down
NR_144555.1	chr2	10830136	10832222	2087	+	5822	NR_144555.1	RN7SL832P	106479524	0.482905	2.14144	4.21279	0.0469949	0.518677	up
NM_152402.2	chr4	118004710	118006736	2027	-	14877	NM_152402.2	TRAM1L1	133022	-0.301363	5.26103	4.21102	0.0470388	0.518832	down
NM_005029.3	chr10	103989946	104001231	11286	-	30357	NM_005029.3	PITX3	5309	1.17646	-1.23532	4.2091	0.0470867	0.518832	up
NM_182577.2	chr19	463346	474983	11638	-	50449	NM_182577.2	ODF3L2	284451	0.666958	1.04699	4.20891	0.0470914	0.518832	up
NM_032526.2	chr1	40124793	40137710	12918	-	3677	NM_032526.2	NT5C1A	84618	-0.652356	1.64028	4.20734	0.0471304	0.518958	down
NM_032138.5	chr13	41765527	41768711	3185	-	37725	NM_032138.5	KBTBD7	84078	-0.307876	5.4338	4.20441	0.0472036	0.519281	down
NR_121599.1	chr9	8858018	8861727	3710	+	25668	NR_121599.1	PTPRD-AS1	101929407	1.05734	-0.901454	4.20396	0.0472148	0.519281	up
NR_110534.1	chr5	149310921	149312540	1620	-	17550	NR_110534.1	LOC644762	644762	0.275671	4.29914	4.20258	0.0472493	0.519356	up
NM_018558.3	chrX	151806637	151821825	15189	+	56891	NM_018558.3	GABRQ	55879	-0.944649	2.08497	4.19725	0.0473827	0.519531	down
NR_046992.1	chr13	112547692	112555490	7799	+	37476	NR_046992.1	LINC00354	101928616	1.30751	-1.24921	4.19703	0.0473883	0.519531	up
NM_001330490.1	chr1	36185819	36235551	49733	-	3597	NM_001330490.1	CLSPN	63967	1.22903	-1.38596	4.40787	0.0474435	0.519531	up
NR_135472.1	chr21	27838528	27945723	107196	-	54277	NR_135472.1	CYYR1	116159	1.26345	-1.37742	4.58864	0.0474435	0.519531	up
NM_032305.2	chr1	145456236	145470408	14173	-	4486	NM_032305.2	POLR3GL	84265	1.34943	-1.37111	4.2504	0.0474435	0.519531	up
NM_000212.2	chr17	45331208	45390077	58870	+	45294	NM_000212.2	ITGB3	3690	0.693562	3.05708	4.19478	0.0474446	0.519531	up
NR_110585.1	chr2	43254992	43266682	11691	-	8159	NR_110585.1	LINC01819	102723854	0.805946	1.83677	4.19425	0.0474581	0.519531	up
NM_014396.3	chr7	38763543	38948800	185258	-	22568	NM_014396.3	VPS41	27072	1.29254	-1.37939	4.19041	0.0475545	0.520186	up
NM_030663.2	chr1	152850798	152857523	6726	+	1769	NM_030663.2	SMCP	4184	-1.13942	-1.35292	4.26233	0.0476103	0.520186	down
NM_022746.3	chr1	220960039	220987741	27703	+	2686	NM_022746.3	2001-03-01	64757	-0.3114	6.08036	4.18762	0.0476249	0.520186	down
NM_006108.3	chr11	13984184	14289679	305496	+	30973	NM_006108.3	SPON1	10418	-0.333237	9.1057	4.18748	0.0476283	0.520186	down
NM_005768.5	chr12	7085347	7125842	40496	-	35677	NM_005768.5	LPCAT3	10162	0.308173	5.9008	4.18578	0.0476712	0.520281	up
NM_006150.4	chrX	49031151	49042853	11703	-	57305	NM_006150.4	PRICKLE3	4007	1.12365	-1.23945	4.41219	0.0477066	0.520281	up
NM_138288.3	chr14	34902144	34931468	29325	-	39340	NM_138288.3	SPTSSA	171546	0.305653	6.83288	4.18386	0.0477198	0.520281	up
NR_027052.1	chr22	21356211	21357561	1351	+	54717	NR_027052.1	THAP7-AS1	439931	0.433823	1.55294	4.18072	0.0477992	0.520839	up
NM_138413.3	chr10	99344102	99372559	28458	+	28868	NM_138413.3	HOGA1	112817	0.648189	1.07031	4.17945	0.0478313	0.520839	up
NM_175575.5	chr17	48912605	48919709	7105	+	45431	NM_175575.5	WFIKKN2	124857	1.20126	-0.0307425	4.17856	0.0478539	0.520839	up
NM_198571.2	chr7	100813774	100823557	9784	-	23086	NM_198571.2	NAT16	375607	-1.09569	2.89129	4.17712	0.0478903	0.520934	down
NM_001199692.2	chr7	150755287	150773614	18328	+	22211	NM_001199692.2	SLC4A2	6522	0.804061	-0.253617	4.1745	0.0479567	0.521357	up
NM_001949.4	chr6	20402137	20493945	91809	+	17984	NM_001949.4	E2F3	1871	0.916494	-0.85906	4.17275	0.0480014	0.521542	up
NM_002994.4	chr4	74861359	74864446	3088	-	14546	NM_002994.4	CXCL5	6374	0.641985	3.76703	4.16844	0.0481111	0.522255	up
NR_024100.1	chr21	42513427	42519991	6565	-	54450	NR_024100.1	LINC00323	284835	-0.605329	1.5277	4.16757	0.0481332	0.522255	down
NR_002147.2	chr7	98870924	98895595	24672	+	21662	NR_002147.2	MYH16	84176	0.94762	-0.969333	4.16683	0.048152	0.522255	up
NM_021177.4	chr6	31765169	31774761	9593	-	19743	NM_021177.4	LSM2	57819	0.236284	5.87593	4.16576	0.0481793	0.522255	up
NM_003745.1	chr16	11348274	11350039	1766	-	43638	NM_003745.1	SOCS1	8651	0.602396	2.54355	4.16425	0.048218	0.522255	up
NR_022006.1	chr7	26572740	26578444	5705	-	22457	NR_022006.1	KIAA0087	9808	-0.882505	1.68637	4.16365	0.0482333	0.522255	down
NM_001320831.1	chr13	53226826	53262489	35664	+	37280	NM_001320831.1	SUGT1	10910	1.16015	-1.39954	4.16087	0.0483045	0.522471	up
NM_006648.3	chr9	95947212	96082854	135643	+	26059	NM_006648.3	WNK2	65268	-0.455113	1.89217	4.1607	0.0483087	0.522471	down
NM_000303.2	chr16	8891670	8943194	51525	+	42324	NM_000303.2	PMM2	5373	0.297688	4.28769	4.156	0.0484293	0.522938	up
NM_003714.2	chr5	172741726	172756506	14781	-	17702	NM_003714.2	STC2	8614	0.648554	2.00625	4.15514	0.0484513	0.522938	up
NM_207335.2	chr3	127641902	127706514	64613	+	10842	NM_207335.2	KBTBD12	166348	-0.401005	3.77335	4.15443	0.0484698	0.522938	down
NM_001256064.1	chr12	41221740	41366519	144780	+	34512	NM_001256064.1	CNTN1	1272	-0.701824	1.09587	4.15392	0.0484829	0.522938	down
NM_003280.2	chr3	52485107	52488057	2951	-	12010	NM_003280.2	TNNC1	7134	0.562363	0.223225	4.15362	0.0484905	0.522938	up
NM_001145785.1	chr19	19256376	19281098	24723	-	51017	NM_001145785.1	MEF2B	100271849	1.14224	-1.43249	5.02795	0.0485832	0.523638	up
NM_001142685.1	chr11	128834955	129062093	227139	-	34043	NM_001142685.1	ARHGAP32	9743	-0.433718	3.31957	4.14792	0.0486373	0.523778	down
NR_136274.1	chr8	1919345	1921511	2167	-	24516	NR_136274.1	LOC101928058	101928058	0.915725	-0.727556	4.14736	0.0486518	0.523778	up
NM_020738.2	chr2	8868987	8977755	108769	-	7821	NM_020738.2	KIDINS220	57498	-0.226177	8.73586	4.14601	0.0486867	0.523855	down
NM_001348170.1	chr17	73841780	73852517	10738	-	47393	NM_001348170.1	WBP2	23558	1.15928	-0.903279	4.1406	0.0488266	0.52475	up
NM_001330479.1	chr2	32390910	32449448	58539	+	6032	NM_001330479.1	SLC30A6	55676	-1.22844	-1.32451	4.14007	0.0488403	0.52475	down
NM_004061.4	chr5	21750975	22853731	1102757	-	16716	NM_004061.4	CDH12	1010	-0.928513	0.156734	4.13956	0.0488535	0.52475	down
NM_001289107.1	chr17	74620838	74639920	19083	-	47428	NM_001289107.1	ST6GALNAC1	55808	1.02036	-0.679408	4.13797	0.0488948	0.524828	up
NM_005614.3	chr7	151163098	151217010	53913	-	23513	NM_005614.3	RHEB	6009	0.233067	5.13995	4.13625	0.0489395	0.524828	up
NM_024758.4	chr1	15898194	15911605	13412	-	3233	NM_024758.4	AGMAT	79814	0.443042	2.47229	4.13607	0.0489442	0.524828	up
NM_001253835.1	chr4	57898404	57976551	78148	-	14478	NM_001253835.1	IGFBP7	3490	1.12769	-0.968193	4.13305	0.0490226	0.524914	up
NM_001320822.1	chr13	114747194	114843454	96261	-	38118	NM_001320822.1	RASA3	22821	1.34774	-1.18328	4.20515	0.0490303	0.524914	up
NM_001013706.2	chr19	4522543	4535208	12666	-	50568	NM_001013706.2	PLIN5	440503	0.490092	4.9995	4.13253	0.0490362	0.524914	up
NM_177476.3	chr8	143852615	143858438	5824	-	25467	NM_177476.3	LYNX1	66004	-0.999253	-1.33732	4.20383	0.0490636	0.524914	down
NM_005966.3	chr2	191513848	191557492	43645	+	7199	NM_005966.3	NAB1	4664	-0.805647	0.0987826	4.13028	0.0490949	0.524931	down
NR_046205.1	chr8	30239635	30242917	3283	-	24772	NR_046205.1	RBPMS-AS1	100128750	0.796913	0.388508	4.12928	0.0491209	0.524931	up
NM_006078.3	chr22	36956916	37098690	141775	-	55587	NM_006078.3	CACNG2	10369	-0.560166	5.88963	4.1263	0.0491987	0.524953	down
NM_001243374.1	chr4	170581213	170644338	63126	+	14042	NM_001243374.1	CLCN3	1182	-0.557363	1.08718	4.12594	0.0492082	0.524953	down
NR_135096.1	chr11	94306938	94473521	166584	-	33622	NR_135096.1	LOC105369438	105369438	1.08655	-1.4066	4.19808	0.0492092	0.524953	up
NM_032810.3	chr10	89511269	89577988	66720	-	30096	NM_032810.3	ATAD1	84896	-0.493406	1.33437	4.1245	0.0492458	0.524953	down
NR_105016.1	chr5	82146683	82155655	8973	-	17058	NR_105016.1	LINC01338	102546175	0.685493	3.39172	4.1235	0.0492718	0.524953	up
NM_024637.4	chr7	99756865	99766373	9509	-	23050	NM_024637.4	GAL3ST4	79690	0.487302	4.64648	4.1228	0.0492901	0.524953	up
NR_029420.1	chr7	56491397	56516068	24672	-	22735	NR_029420.1	LOC650226	650226	-1.79301	-0.368754	4.11289	0.0495504	0.526147	down
NM_001126106.2	chr14	23242431	23289020	46590	-	39204	NM_001126106.2	SLC7A7	9056	1.37128	-1.34938	4.11217	0.0495693	0.526147	up
NR_120453.1	chr17	6797096	6803668	6573	+	44533	NR_120453.1	ALOX12P2	245	-1.25401	-1.38053	4.11152	0.0495865	0.526147	down
NM_018659.2	chr4	5016313	5021197	4885	-	14209	NM_018659.2	CYTL1	54360	0.645605	2.91103	4.11151	0.0495868	0.526147	up
NM_006406.1	chrX	23685645	23704514	18870	+	56007	NM_006406.1	PRDX4	10549	0.274838	6.1685	4.11145	0.0495882	0.526147	up
NR_033342.1	chr19	3225483	3297074	71592	+	48590	NR_033342.1	CELF5	60680	-1.03336	0.334492	4.11038	0.0496165	0.526147	down
NR_033931.1	chr4	14113592	14141676	28085	+	13224	NR_033931.1	LINC01085	152742	-0.703911	0.890422	4.10899	0.0496533	0.526147	down
NM_004304.4	chr2	29415640	30144477	728838	-	8045	NM_004304.4	ALK	238	-0.657183	3.52038	4.10845	0.0496675	0.526147	down
NM_001286495.1	chr15	52873518	52944247	70730	-	41370	NM_001286495.1	FAM214A	56204	1.12993	-1.09087	4.10765	0.0496887	0.526147	up
NM_004473.3	chr9	100615537	100618997	3461	+	26113	NM_004473.3	FOXE1	2304	-1.32084	-1.29604	4.1072	0.0497005	0.526147	down
NM_032199.2	chr10	63661013	63856707	195695	+	28409	NM_032199.2	ARID5B	84159	-0.617809	0.376709	4.1062	0.0497269	0.526147	down
NM_002240.4	chr21	38996525	39288741	292217	-	54415	NM_002240.4	KCNJ6	3763	-0.699949	0.513447	4.10572	0.0497396	0.526147	down
NM_173465.3	chr5	177664617	178017556	352940	-	17786	NM_173465.3	COL23A1	91522	0.535804	2.24575	4.10377	0.0497912	0.526147	up
NM_001037161.1	chr14	74003928	74010498	6571	+	38623	NM_001037161.1	ACOT1	641371	-0.862897	2.72196	4.10371	0.0497929	0.526147	down
NR_134616.1	chr6	17706361	17707575	1215	+	17977	NR_134616.1	LOC105374952	105374952	1.06187	-0.89465	4.10141	0.0498538	0.526495	up
NM_012081.5	chr5	95220802	95297775	76974	-	17133	NM_012081.5	ELL2	22936	0.341306	6.97934	4.09957	0.0499025	0.526715	up
NM_000095.2	chr19	18893583	18902114	8532	-	50996	NM_000095.2	COMP	1311	1.50344	-0.903878	4.09738	0.0499607	0.527034	up
NM_133638.4	chr5	128795958	129074376	278419	+	15948	NM_133638.4	ADAMTS19	171019	-0.566039	2.95277	4.08157	0.0503827	0.531188	down
NR_037195.1	chr2	216476286	216708259	231974	-	9462	NR_037195.1	LINC00607	646324	-0.684481	0.0976884	4.07813	0.0504752	0.531667	down
NR_036230.1	chr2	28219234	28219316	83	+	5993	NR_036230.1	MIR4263	100422965	1.11794	-1.13612	4.07778	0.0504845	0.531667	up
NM_152729.2	chr6	116421999	116566853	144855	+	18908	NM_152729.2	NT5DC1	221294	-0.249246	6.15755	4.07474	0.0505663	0.532231	down
NM_004489.4	chr17	7215978	7218658	2681	-	46180	NM_004489.4	GPS2	2874	0.220133	6.77038	4.07329	0.0506054	0.532345	up
NM_054013.3	chr5	179224597	179229875	5279	-	17802	NM_054013.3	MGAT4B	11282	-0.649582	-0.00666362	4.07118	0.0506623	0.532401	down
NR_033186.1	chr1	178511931	178518024	6094	+	2252	NR_033186.1	C1orf220	400798	-0.556886	0.204701	4.071	0.0506672	0.532401	down
NM_016494.3	chr2	85822837	85824831	1995	+	6416	NM_016494.3	RNF181	51255	0.234843	6.50267	4.06724	0.0507687	0.533171	up
NM_153690.4	chr3	194406622	194409766	3145	+	11367	NM_153690.4	FAM43A	131583	0.365168	5.46439	4.06509	0.0508271	0.533327	up
NM_001001658.1	chr7	142723287	142724219	933	-	23429	NM_001001658.1	OR9A2	135924	-1.03336	-0.935194	4.0646	0.0508402	0.533327	down
NM_012186.2	chr1	47881744	47883724	1981	+	931	NM_012186.2	FOXE3	2301	-0.906986	0.669903	4.05999	0.0509654	0.534145	down
NM_139159.4	chr19	4675243	4723855	48613	-	50572	NM_139159.4	DPP9	91039	0.240605	6.51838	4.05964	0.0509748	0.534145	up
NM_205855.3	chr7	135414346	135433594	19249	-	23369	NM_205855.3	FAM180A	389558	-0.699998	0.728816	4.05709	0.0510441	0.534573	down
NM_005631.4	chr7	128828713	128853386	24674	+	21973	NM_005631.4	SMO	6608	0.49038	5.87125	4.05465	0.0511105	0.534972	up
NR_038904.1	chr11	13001081	13011095	10015	-	32707	NR_038904.1	LINC00958	100506305	-0.604937	0.95734	4.05356	0.0511404	0.534988	down
NM_006455.2	chr17	39958205	39968451	10247	-	46795	NM_006455.2	P3H4	10609	0.269424	5.19687	4.05191	0.0511853	0.53516	up
NR_034095.1	chr15	95822517	95870329	47813	-	41960	NR_034095.1	LINC01197	400456	-0.562883	1.06102	4.05067	0.0512191	0.535217	down
NM_003818.3	chr20	5107407	5178533	71127	+	52303	NM_003818.3	CDS2	8760	-0.246702	9.39325	4.04937	0.0512546	0.535291	down
NM_014182.4	chr12	56211806	56214959	3154	+	34779	NM_014182.4	ORMDL2	29095	0.266424	4.66784	4.04776	0.0512988	0.535359	up
NM_203406.1	chr5	89754020	89770585	16566	-	17091	NM_203406.1	MBLAC2	153364	-0.40588	5.99171	4.04706	0.0513179	0.535359	down
NM_004319.2	chr1	176830200	177134040	303841	-	5186	NM_004319.2	ASTN1	460	-0.345079	8.21492	4.04598	0.0513473	0.53537	down
NM_001307924.2	chr12	76442372	76478813	36442	-	36495	NM_001307924.2	NAP1L1	4673	0.293176	3.69422	4.04098	0.0514845	0.53625	up
NM_014521.2	chr2	235860628	235964358	103731	+	7659	NM_014521.2	SH3BP4	23677	0.387798	7.32686	4.04062	0.0514944	0.53625	up
NM_001163264.1	chrX	24576204	24690979	114776	-	57161	NM_001163264.1	PCYT1B	9468	-0.57803	0.750257	4.0398	0.0515171	0.53625	down
NM_033452.2	chr17	73870245	73874656	4412	-	47394	NM_033452.2	TRIM47	91107	0.401086	7.15713	4.03491	0.0516517	0.536736	up
NM_153256.3	chr10	11865397	11914276	48880	+	27971	NM_153256.3	PROSER2	254427	0.430613	3.35167	4.03484	0.0516536	0.536736	up
NM_001202435.1	chr2	166845670	167005642	159973	-	9083	NM_001202435.1	SCN1A	6323	-1.17305	-1.16873	4.03397	0.0516776	0.536736	down
NM_173808.2	chr1	71868625	72748277	879653	-	4073	NM_173808.2	NEGR1	257194	-0.434706	7.91217	4.03331	0.0516957	0.536736	down
NR_110670.1	chr19	3141574	3155173	13600	-	50519	NR_110670.1	LOC100996351	100996351	1.2159	-1.29553	4.03293	0.0517061	0.536736	up
NM_001144058.1	chr11	131780712	132206716	426005	+	32393	NM_001144058.1	NTM	50863	-1.22226	-0.895368	4.02967	0.0517961	0.537374	down
NM_001077693.3	chr5	138784243	138842328	58086	-	17408	NM_001077693.3	ECSCR	641700	0.8816	0.24089	4.02715	0.0518659	0.537392	up
NM_145811.2	chr17	64873391	64881395	8005	+	45589	NM_145811.2	CACNG5	27091	-0.843302	0.802289	4.02587	0.0519014	0.537392	down
NM_014906.4	chr17	56833230	57062540	229311	+	45492	NM_014906.4	PPM1E	22843	-1.16726	-0.929069	4.0255	0.0519118	0.537392	down
NM_001318399.1	chr11	47861053	47870096	9044	-	33001	NM_001318399.1	NUP160	23279	0.986213	-0.379833	4.02398	0.0519537	0.537392	up
NR_000018.1	chr19	49994432	49994517	86	+	49907	NR_000018.1	SNORD35A	26816	-1.16693	-1.28268	4.02357	0.0519653	0.537392	down
NM_005822.3	chr6	46188467	46293629	105163	-	20082	NM_005822.3	RCAN2	10231	-0.643795	2.68265	4.02344	0.0519689	0.537392	down
NM_001286771.2	chr4	73939683	74088831	149149	-	14536	NM_001286771.2	ANKRD17	26057	-1.28253	-1.14884	4.02157	0.0520207	0.537633	down
NM_001271775.1	chr9	135973107	136004788	31682	-	27664	NM_001271775.1	RALGDS	5900	0.939727	-0.825188	4.01891	0.0520949	0.538104	up
NM_173482.2	chr19	15121539	15134083	12545	+	48972	NM_173482.2	CCDC105	126402	-0.955402	-1.00968	4.01523	0.0521972	0.538565	down
NM_000918.3	chr17	79801034	79818544	17511	-	47536	NM_000918.3	P4HB	5034	0.212696	9.18851	4.01311	0.0522564	0.538565	up
NR_003190.2	chr17	16690206	16707819	17614	+	44744	NR_003190.2	USP32P1	162632	-0.947373	0.428928	4.01196	0.0522885	0.538565	down
NM_153200.2	chr9	139757121	139760788	3668	-	27770	NM_153200.2	EDF1	8721	-0.823682	-0.369265	4.01091	0.0523178	0.538565	down
NM_006498.2	chr22	37966253	37976024	9772	-	55615	NM_006498.2	LGALS2	3957	0.859591	-0.403354	4.01025	0.0523364	0.538565	up
NR_026777.2	chr10	43008958	43048318	39361	-	29599	NR_026777.2	ZNF37BP	100129482	-0.384176	5.75564	4.01017	0.0523384	0.538565	down
NM_001014975.2	chr1	196621008	196670696	49689	+	2377	NM_001014975.2	CFH	3075	0.824464	1.76211	4.01014	0.0523395	0.538565	up
NM_001024675.1	chr20	32254304	32256331	2028	+	52543	NM_001024675.1	ACTL10	170487	0.51837	1.10537	4.00712	0.0524241	0.539141	up
NM_003009.2	chr19	48281842	48287939	6098	+	49812	NM_003009.2	SELENOW	6415	0.23126	10.7903	4.0054	0.0524721	0.539341	up
NM_173872.3	chr4	170541672	170644338	102667	+	14041	NM_173872.3	CLCN3	1182	-1.31228	-1.37023	5.38874	0.0526392	0.539658	down
NM_001316935.1	chr1	54387234	54411981	24748	-	3954	NM_001316935.1	HSPB11	51668	-1.12911	-1.30515	4.29511	0.0526482	0.539658	down
NM_001287.5	chr16	1494934	1525085	30152	-	43432	NM_001287.5	CLCN7	1186	-1.147	-1.29761	4.1642	0.0526482	0.539658	down
NR_110048.1	chr12	50305736	50320122	14387	+	34603	NR_110048.1	LOC101927292	NA	-1.05953	-1.37122	4.06346	0.0527565	0.539658	down
NM_001077188.1	chrX	131760038	132095423	335386	-	57818	NM_001077188.1	HS6ST2	90161	-1.23453	-1.10114	3.99473	0.0527724	0.539658	down
NM_024667.2	chr12	123349875	123380712	30838	-	36936	NM_024667.2	VPS37B	79720	0.262034	6.78037	3.99445	0.0527803	0.539658	up
NM_001320755.1	chr17	26989216	27029702	40487	+	44855	NM_001320755.1	SUPT6H	6830	-1.25326	-1.36795	3.99281	0.0528266	0.539658	down
NR_039744.1	chr16	30886587	30886644	58	-	43911	NR_039744.1	MIR4519	100616231	1.10328	-1.14584	3.99156	0.0528618	0.539658	up
NM_016504.2	chr17	48445228	48450562	5335	-	47062	NM_016504.2	MRPL27	51264	0.205885	6.6552	3.99055	0.0528905	0.539658	up
NM_000489.4	chrX	76760356	77041755	281400	-	57530	NM_000489.4	ATRX	546	-1.15142	-1.24836	4.0474	0.0529209	0.539658	down
NM_005319.3	chr6	26055968	26056699	732	-	19549	NM_005319.3	HIST1H1C	3006	0.550889	5.1256	3.98909	0.0529318	0.539658	up
NM_021223.2	chr7	44178463	44180916	2454	-	22614	NM_021223.2	MYL7	58498	1.08888	-0.834399	3.98907	0.0529324	0.539658	up
NR_132383.1	chr2	216582766	216585669	2904	+	7415	NR_132383.1	LINC01614	105373869	-1.19662	-1.24316	3.98833	0.0529534	0.539658	down
NM_182541.2	chrX	102965837	102968960	3124	+	56549	NM_182541.2	TMEM31	203562	0.74661	0.130458	3.98809	0.0529603	0.539658	up
NM_022481.5	chr5	141032968	141061800	28833	-	17457	NM_022481.5	ARAP3	64411	0.442898	5.05924	3.98525	0.0530407	0.539658	up
NM_016113.4	chr17	16318856	16340317	21462	+	44706	NM_016113.4	TRPV2	51393	0.354036	3.94483	3.98452	0.0530615	0.539658	up
NM_017839.4	chr16	55542913	55620582	77670	+	42783	NM_017839.4	LPCAT2	54947	0.590712	5.80444	3.9837	0.0530849	0.539658	up
NM_152400.2	chr4	113066553	113110237	43685	+	13770	NM_152400.2	C4orf32	NA	0.532331	4.26504	3.98282	0.0531097	0.539658	up
NR_003572.2	chr8	158344	182318	23975	-	24506	NR_003572.2	RPL23AP53	644128	-0.295802	3.69912	3.98281	0.0531101	0.539658	down
NM_013244.3	chr12	86373037	87232681	859645	-	36535	NM_013244.3	MGAT4C	25834	-0.479611	4.75678	3.97949	0.0532046	0.539658	down
NM_018430.3	chr16	67840781	67861971	21191	+	42997	NM_018430.3	TSNAXIP1	55815	1.08153	-1.39787	4.04708	0.0532071	0.539658	up
NM_194249.2	chr5	140050381	140053171	2791	-	17441	NM_194249.2	DND1	373863	0.370773	3.24992	3.97827	0.0532392	0.539658	up
NM_002444.2	chrX	64887511	64961793	74283	+	56318	NM_002444.2	MSN	4478	0.322314	9.01319	3.97817	0.0532422	0.539658	up
NM_182511.3	chr18	70203915	70211723	7809	-	48438	NM_182511.3	CBLN2	147381	-0.747267	2.86818	3.97734	0.0532657	0.539658	down
NR_135266.1	chr1	156374044	156391558	17515	-	4867	NR_135266.1	C1orf61	10485	-1.09752	-1.19188	3.97719	0.05327	0.539658	down
NM_001044370.1	chr22	43808020	43902800	94781	+	55125	NM_001044370.1	MPPED1	758	-0.786449	4.07592	3.97663	0.053286	0.539658	down
NR_075093.1	chr3	180892932	181460016	567085	+	11212	NR_075093.1	SOX2-OT	347689	-1.24149	-1.15282	3.97361	0.0533723	0.539658	down
NR_121184.1	chr9	80062565	80141678	79114	+	25958	NR_121184.1	GNA14-AS1	101927422	1.2451	-0.943972	3.97252	0.0534034	0.539658	up
NM_005980.2	chr4	6695566	6698897	3332	+	13171	NM_005980.2	S100P	6286	0.89283	0.223999	3.97221	0.0534122	0.539658	up
NM_014649.2	chr19	5587010	5622938	35929	-	50583	NM_014649.2	SAFB2	9667	0.256843	7.42856	3.97171	0.0534266	0.539658	up
NM_001436.3	chr19	40325093	40337054	11962	-	51317	NM_001436.3	FBL	2091	0.183865	7.28446	3.97084	0.0534516	0.539658	up
NM_001291986.1	chr6	32938665	32949282	10618	+	18335	NM_001291986.1	BRD2	6046	1.2957	-1.35884	4.03121	0.0534564	0.539658	up
NR_135769.1	chr2	74756532	74760683	4152	+	6359	NR_135769.1	HTRA2	27429	1.28728	-1.36639	4.53828	0.0534564	0.539658	up
NM_018229.3	chr14	57735606	57756797	21192	+	38460	NM_018229.3	AP5M1	55745	-0.313954	3.81791	3.96916	0.0534997	0.539658	down
NM_024876.3	chr19	41197434	41222790	25357	-	51345	NM_024876.3	COQ8B	79934	0.530744	1.16814	3.96636	0.05358	0.539658	up
NR_002575.1	chr13	27829538	27829663	126	+	37088	NR_002575.1	SNORA27	619499	-1.17914	-1.26136	4.03201	0.0536256	0.539658	down
NM_001017368.1	chr17	33336131	33390759	54629	-	46568	NM_001017368.1	RFFL	117584	0.903323	-0.473442	3.96476	0.0536258	0.539658	up
NM_005157.5	chr9	133710642	133763062	52421	+	26510	NM_005157.5	ABL1	25	-0.773235	-0.412146	3.96403	0.0536468	0.539658	down
NM_012393.2	chr17	8152596	8173809	21214	+	44633	NM_012393.2	PFAS	5198	-0.277538	5.56164	3.96152	0.053719	0.539658	down
NR_144388.1	chr14	42076059	42373752	297694	+	38379	NR_144388.1	LRFN5	145581	-0.882837	-0.826893	3.9613	0.0537255	0.539658	down
NM_001552.2	chr17	38599676	38613982	14307	+	45082	NM_001552.2	IGFBP4	3487	0.405257	6.61056	3.96116	0.0537293	0.539658	up
NM_152275.3	chr2	178479026	178483694	4669	-	9197	NM_152275.3	TTC30A	92104	-0.407938	5.3934	3.96088	0.0537376	0.539658	down
NM_013417.3	chr9	94972489	95056038	83550	-	27188	NM_013417.3	IARS	3376	-1.11766	-1.32615	4.02786	0.0537413	0.539658	down
NM_130807.2	chr19	2071035	2096269	25235	-	50491	NM_130807.2	MOB3A	126308	0.291177	6.84625	3.9596	0.0537743	0.539658	up
NM_001286270.1	chr16	4545820	4560348	14529	+	42289	NM_001286270.1	HMOX2	3163	1.26118	-1.28006	3.95814	0.0538164	0.539658	up
NM_000707.3	chr1	206224283	206231482	7200	+	2519	NM_000707.3	AVPR1B	553	-1.07191	-1.38559	4.02453	0.0538347	0.539658	down
NR_002932.2	chr6	111367622	111368757	1136	-	20455	NR_002932.2	GSTM2P1	442245	-0.382681	5.85601	3.95615	0.0538739	0.539658	down
NM_015382.3	chr14	31569321	31676729	107409	-	39332	NM_015382.3	HECTD1	25831	-0.225392	8.6251	3.95604	0.0538771	0.539658	down
NM_022463.4	chr17	702553	882998	180446	-	45964	NM_022463.4	NXN	64359	0.536634	1.99583	3.95256	0.0539777	0.539976	up
NM_023008.3	chr19	10663761	10676702	12942	-	50743	NM_023008.3	KRI1	65095	0.308075	5.76704	3.95245	0.0539808	0.539976	up
NM_001320042.1	chr12	108955239	108963160	7922	+	35228	NM_001320042.1	ISCU	23479	0.344636	1.64421	3.95021	0.0540456	0.539976	up
NM_001164475.1	chr3	125725200	125820391	95192	-	12417	NM_001164475.1	SLC41A3	54946	-1.31885	-1.25428	3.94869	0.0540897	0.539976	down
NM_003145.3	chr1	155978839	155990758	11920	-	4832	NM_003145.3	SSR2	6746	0.184081	7.98194	3.94828	0.0541017	0.539976	up
NM_207341.3	chr11	60635015	60643164	8150	+	31457	NM_207341.3	ZP1	22917	0.574599	0.910464	3.94766	0.0541195	0.539976	up
NM_001290746.1	chr19	50433461	50437193	3733	+	49956	NM_001290746.1	ATF5	22809	1.25266	-1.21741	3.94719	0.0541332	0.539976	up
NM_020810.3	chr14	61438159	61447797	9639	-	39540	NM_020810.3	TRMT5	57570	-0.189511	5.61292	3.94703	0.054138	0.539976	down
NM_024561.4	chr13	41885341	41951166	65826	+	37162	NM_024561.4	NAA16	79612	0.560276	4.51296	3.94389	0.0542293	0.540333	up
NM_003716.3	chr3	62384021	62861064	477044	-	12092	NM_003716.3	CADPS	8618	-1.37964	-0.682779	3.94293	0.054257	0.540333	down
NR_145425.1	chr1	155286645	155293636	6992	-	4798	NR_145425.1	RUSC1-AS1	284618	-1.22697	-1.10958	3.94284	0.0542597	0.540333	down
NM_015995.3	chr15	31619058	31670102	51045	+	40135	NM_015995.3	KLF13	51621	0.239369	8.72716	3.94173	0.054292	0.540369	up
NM_052867.2	chr13	101706130	102068813	362684	-	38025	NM_052867.2	NALCN	259232	-0.306455	7.10065	3.94017	0.0543376	0.540441	down
NM_017875.2	chr3	39424815	39438819	14005	+	10085	NM_017875.2	SLC25A38	54977	0.189259	5.91355	3.93952	0.0543565	0.540441	up
NM_004468.4	chr1	38462442	38471187	8746	-	3652	NM_004468.4	FHL3	2275	0.888372	0.617834	3.93544	0.0544757	0.54104	up
NM_001302891.1	chr17	63631658	64187987	556330	-	47254	NM_001302891.1	CEP112	201134	1.01896	-0.860851	3.93438	0.0545066	0.54104	up
NR_015436.1	chr5	87836597	87980620	144024	-	17075	NR_015436.1	LINC00461	645323	-0.402848	2.86412	3.93317	0.054542	0.54104	down
NR_002330.1	chr7	116592500	116594388	1889	-	23214	NR_002330.1	ST7-AS1	93653	0.661989	1.59153	3.93295	0.0545484	0.54104	up
NM_003505.1	chr7	90893783	90898132	4350	+	21605	NM_003505.1	FZD1	8321	-0.258345	6.26878	3.93254	0.0545603	0.54104	down
NM_181501.1	chr5	52084136	52249485	165350	+	15426	NM_181501.1	ITGA1	3672	0.564865	6.05134	3.93036	0.0546242	0.541389	up
NR_131178.1	chr10	77407267	78317133	909867	+	28602	NR_131178.1	C10orf11	NA	1.19548	-1.41554	4.45246	0.0546735	0.541592	up
NM_032377.3	chr19	11663858	11670051	6194	-	50785	NM_032377.3	ELOF1	84337	0.215562	6.89989	3.92656	0.0547358	0.541862	up
NR_104193.2	chr20	14535030	14609554	74525	+	52365	NR_104193.2	MACROD2-IT1	140848	1.58148	-1.04019	3.9258	0.0547582	0.541862	up
NM_021963.3	chrX	72432135	72434710	2576	-	57500	NM_021963.3	NAP1L2	4674	-0.525678	7.55531	3.9182	0.054982	0.543671	down
NR_028032.1	chr6	29942892	29946180	3289	+	18154	NR_028032.1	HCG9	10255	-0.942337	-0.468736	3.91764	0.0549987	0.543671	down
NR_026562.3	chr20	35234137	35240960	6824	+	52612	NR_026562.3	C20orf24	NA	1.01244	-1.1024	3.91465	0.0550872	0.54426	up
NM_015398.2	chr4	187065995	187093817	27823	+	14116	NM_015398.2	FAM149A	25854	-0.914894	-0.221415	3.90998	0.0552254	0.545157	down
NM_033018.3	chrX	47077528	47089396	11869	+	56121	NM_033018.3	CDK16	5127	-0.389666	1.41816	3.90911	0.0552514	0.545157	down
NM_022459.4	chr13	21351468	21476913	125446	-	37559	NM_022459.4	XPO4	64328	-0.245063	6.06364	3.90764	0.0552949	0.545157	down
NM_001320135.1	chr15	88459493	88749205	289713	-	41879	NM_001320135.1	NTRK3	4916	0.959552	-1.39501	4.13992	0.0553038	0.545157	up
NM_019849.2	chr19	33699570	33716756	17187	-	51105	NM_019849.2	SLC7A10	56301	-0.42351	6.38581	3.90671	0.0553226	0.545157	down
NM_024092.2	chr11	60681371	60690915	9545	+	31458	NM_024092.2	TMEM109	79073	0.248709	7.52289	3.90314	0.055429	0.545678	up
NR_036537.1	chr2	130724165	130738045	13881	-	8875	NR_036537.1	RAB6C-AS1	100131320	-0.678395	1.6915	3.90293	0.0554352	0.545678	down
NM_031484.3	chr10	99473465	99477909	4445	+	28871	NM_031484.3	MARVELD1	83742	-0.278326	5.24881	3.90051	0.0555073	0.545678	down
NM_018441.5	chr2	216903111	216946539	43429	-	9464	NM_018441.5	PECR	55825	-0.277485	4.27106	3.90028	0.0555142	0.545678	down
NM_018997.3	chr1	150266262	150281414	15153	+	1672	NM_018997.3	MRPS21	54460	0.451702	4.92456	3.89908	0.05555	0.545678	up
NM_021165.3	chr1	177140524	177251558	111035	+	2243	NM_021165.3	BRINP2	57795	-0.279891	6.69397	3.8986	0.0555642	0.545678	down
NM_001033873.1	chr12	51639133	51663994	24862	-	36142	NM_001033873.1	SMAGP	57228	-1.07258	-1.35955	3.96271	0.0555976	0.545678	down
NM_134425.2	chr4	972861	987228	14368	-	14146	NM_134425.2	SLC26A1	10861	0.620386	0.611657	3.89717	0.055607	0.545678	up
NM_001317333.1	chr3	48956253	49022974	66722	+	10243	NM_001317333.1	ARIH2	10425	-0.709131	0.108528	3.89391	0.0557048	0.546046	down
NM_000960.3	chr19	47123725	47128354	4630	-	51555	NM_000960.3	PTGIR	5739	0.830956	0.3144	3.89255	0.0557456	0.546046	up
NM_005761.2	chr12	94542499	94701451	158953	+	35079	NM_005761.2	PLXNC1	10154	-0.694911	3.6745	3.89212	0.0557584	0.546046	down
NM_001136537.1	chr1	45274154	45279801	5648	+	870	NM_001136537.1	BTBD19	149478	0.604788	1.32903	3.8911	0.0557889	0.546046	up
NR_138257.1	chr17	43697695	43719673	21979	+	45253	NR_138257.1	CRHR1-IT1	NA	-0.268015	3.68821	3.89108	0.0557894	0.546046	down
NM_178505.7	chr10	63166400	63213208	46809	-	29845	NM_178505.7	TMEM26	219623	0.71387	2.16901	3.88958	0.0558346	0.546046	up
NM_018374.3	chr7	12250848	12276890	26043	+	20982	NM_018374.3	TMEM106B	54664	-1.25538	-1.23759	3.88766	0.0558922	0.546046	down
NM_001015878.1	chr19	57742428	57746916	4489	+	50309	NM_001015878.1	AURKC	6795	-1.17232	-1.24844	3.88746	0.0558983	0.546046	down
NR_136151.1	chr2	945320	947078	1759	-	7779	NR_136151.1	LOC101060391	NA	-0.703273	-0.0864247	3.88654	0.055926	0.546046	down
NM_001201372.1	chr7	128431464	128462187	30724	+	21957	NM_001201372.1	CCDC136	64753	-1.13049	-1.20796	3.88627	0.0559342	0.546046	down
NM_025263.3	chr6	30524486	30532473	7988	+	18175	NM_025263.3	PRR3	80742	-0.580728	0.0519053	3.88398	0.056003	0.546435	down
NM_001320792.1	chr19	58740047	58775010	34964	+	50405	NM_001320792.1	ZNF544	27300	-1.20525	-1.26359	3.88254	0.0560465	0.546564	down
NR_137632.1	chr14	24683516	24701591	18076	-	39287	NR_137632.1	NEDD8-MDP1	100528064	0.563727	0.474483	3.88011	0.0561199	0.546564	up
NM_004204.3	chr16	619968	634136	14169	+	42058	NM_004204.3	PIGQ	9091	-1.0411	-0.792078	3.87995	0.0561246	0.546564	down
NM_007104.4	chr6	35436178	35438558	2381	+	18399	NM_007104.4	RPL10A	4736	0.299454	5.31374	3.8797	0.0561322	0.546564	up
NM_001308353.1	chr2	238768187	238820759	52573	+	7680	NM_001308353.1	RAMP1	10267	1.22146	-1.29809	3.87814	0.0561793	0.546741	up
NM_052854.3	chr11	46299189	46342972	43784	+	31179	NM_052854.3	CREB3L1	90993	-0.49407	3.878	3.87508	0.0562719	0.547359	down
NM_002192.3	chr7	41724712	41742706	17995	-	22574	NM_002192.3	INHBA	3624	1.15615	6.44765	3.8732	0.0563289	0.547443	up
NM_001282400.1	chrX	101137260	101187039	49780	-	57603	NM_001282400.1	ZMAT1	84460	-1.162	-1.22805	3.87252	0.0563498	0.547443	down
NR_045494.1	chr8	27454434	27469268	14835	-	24739	NR_045494.1	CLU	1191	0.650952	1.01534	3.8713	0.0563866	0.547443	up
NM_018036.6	chr14	96745539	96829738	84200	-	39886	NM_018036.6	ATG2B	55102	-0.29616	7.24384	3.86938	0.0564451	0.547443	down
NM_015678.4	chr13	35516424	36246873	730450	+	37126	NM_015678.4	NBEA	26960	-0.685708	5.8091	3.86867	0.0564666	0.547443	down
NM_005031.4	chr19	35630363	35633959	3597	+	49299	NM_005031.4	FXYD1	5348	0.777775	0.659832	3.86785	0.0564915	0.547443	up
NM_012113.2	chr1	150230138	150237478	7341	+	1661	NM_012113.2	CA14	23632	-0.457134	5.21974	3.86725	0.0565098	0.547443	down
NM_020707.3	chr3	42734155	42744319	10165	-	11725	NM_020707.3	HHATL	57467	-0.542691	2.12334	3.86637	0.0565366	0.547443	down
NM_130786.3	chr19	58858172	58864865	6694	-	52139	NM_130786.3	A1BG	1	0.410978	4.74865	3.8662	0.0565419	0.547443	up
NR_002451.2	chr4	419224	467998	48775	-	14133	NR_002451.2	ABCA11P	79963	-0.293099	3.55413	3.86282	0.0566447	0.548149	down
NM_153219.3	chr19	56111706	56114504	2799	+	50258	NM_153219.3	ZNF524	147807	0.274411	5.32041	3.86166	0.0566803	0.548149	up
NM_178438.4	chr1	152483320	152484653	1334	+	1751	NM_178438.4	LCE5A	254910	1.27211	-1.19141	3.86092	0.0567029	0.548149	up
NM_001024.3	chr20	60962121	60963576	1456	+	52969	NM_001024.3	RPS21	6227	0.360207	6.40524	3.85955	0.0567448	0.548149	up
NM_015458.3	chr8	11142000	11185655	43656	+	23623	NM_015458.3	MTMR9	66036	-0.241863	7.26603	3.85905	0.0567602	0.548149	down
NM_031968.2	chr17	80416540	80446143	29604	+	45943	NM_031968.2	NARF	26502	0.970121	-0.611905	3.85704	0.0568215	0.548185	up
NR_117100.1	chr8	128301921	128494384	192464	-	25358	NR_117100.1	CASC8	727677	1.04974	-0.108398	3.85702	0.0568221	0.548185	up
NR_049718.1	chr17	13932609	13972775	40167	-	46317	NR_049718.1	COX10-AS1	100874058	-0.373628	1.76541	3.85563	0.0568649	0.548317	down
NM_001647.3	chr3	195295573	195311076	15504	-	12946	NM_001647.3	APOD	347	0.406942	10.7849	3.85246	0.056962	0.548972	up
NM_001729.3	chr4	75669969	75719896	49928	-	14551	NM_001729.3	BTC	685	1.35599	-1.09147	3.85088	0.0570106	0.549096	up
NM_201595.2	chr14	81641796	81687575	45780	-	39743	NM_201595.2	GTF2A1	2957	1.10589	-1.3936	3.91397	0.0570331	0.549096	up
NM_144607.5	chr17	7761045	7765600	4556	+	44619	NM_144607.5	CYB5D1	124637	-1.28016	-1.28164	3.846	0.0571609	0.550046	down
NM_006308.2	chr5	53751431	53752214	784	+	15443	NM_006308.2	HSPB3	8988	-0.935734	0.136039	3.84062	0.057327	0.551097	down
NM_003441.2	chr4	331596	367691	36096	+	13031	NM_003441.2	ZNF141	7700	-0.422264	2.1672	3.84036	0.0573348	0.551097	down
NM_022835.2	chr19	39903750	39919055	15306	+	49539	NM_022835.2	PLEKHG2	64857	0.463716	4.18588	3.83962	0.0573578	0.551097	up
NM_001093729.1	chr18	66382491	66722426	339936	+	47998	NM_001093729.1	CCDC102B	79839	-0.54408	0.846448	3.83801	0.0574077	0.551296	down
NM_001256743.1	chrX	122318096	122338534	20439	+	56710	NM_001256743.1	GRIA3	2892	1.01308	-0.43232	3.83574	0.057478	0.551689	up
NM_001172774.1	chr19	32896655	32976799	80145	+	49220	NM_001172774.1	DPY19L3	147991	-0.641181	0.0565495	3.8345	0.0575166	0.551779	down
NM_001665.3	chr11	3848208	3862213	14006	-	32551	NM_001665.3	RHOG	391	0.33987	7.43302	3.83196	0.0575954	0.551843	up
NM_001258384.2	chr20	2639661	2644869	5209	-	53125	NM_001258384.2	IDH3B	3420	-0.723402	-0.211544	3.83183	0.0575994	0.551843	down
NM_004525.2	chr2	169983619	170219122	235504	-	9094	NM_004525.2	LRP2	4036	-0.5837	6.04422	3.83146	0.0576111	0.551843	down
NM_001134445.1	chr1	85784168	86044046	259879	-	4129	NM_001134445.1	DDAH1	23576	-0.833406	-0.259184	3.83008	0.057654	0.551973	down
NR_131192.1	chr21	44019514	44035205	15692	-	54483	NR_131192.1	LINC01671	101928233	-1.05464	-0.679354	3.82575	0.0577888	0.552983	down
NR_029695.1	chr9	139565054	139565138	85	+	26624	NR_029695.1	MIR126	406913	1.33255	-1.25516	3.8227	0.0578841	0.553614	up
NR_120419.1	chr18	74331734	74335516	3783	+	48022	NR_120419.1	LINC00683	400660	-0.665944	0.267081	3.82159	0.0579188	0.553665	down
NM_001150.2	chr15	90328126	90358072	29947	-	41922	NM_001150.2	ANPEP	290	0.505186	3.89482	3.8179	0.0580344	0.553739	up
NM_001997.4	chr11	64888099	64889672	1574	-	33263	NM_001997.4	FAU	2197	0.27382	8.89816	3.81751	0.0580466	0.553739	up
NM_206855.2	chr6	163835675	163999628	163954	+	19307	NM_206855.2	QKI	9444	-0.416493	2.06835	3.81737	0.0580512	0.553739	down
NM_001347693.1	chr16	53399303	53405124	5822	-	43987	NM_001347693.1	LOC643802	643802	1.13355	-1.1393	3.81626	0.0580858	0.553739	up
NM_001092.4	chr17	906758	1012340	105583	-	45967	NM_001092.4	ABR	29	0.754383	-0.425427	3.81595	0.0580957	0.553739	up
NR_038888.1	chr2	86042253	86053911	11659	+	6427	NR_038888.1	LOC284950	284950	0.871728	-0.04793	3.81547	0.0581106	0.553739	up
NM_001199853.1	chr9	4709556	4742043	32488	-	26719	NM_001199853.1	AK3	50808	0.857619	-1.24745	3.87668	0.0581595	0.553739	up
NM_001037335.2	chr20	62189439	62205592	16154	-	53791	NM_001037335.2	HELZ2	85441	0.599813	2.84718	3.81367	0.0581672	0.553739	up
NM_004864.3	chr19	18496770	18499987	3218	+	49076	NM_004864.3	GDF15	9518	-0.877839	1.73408	3.81219	0.0582137	0.553739	down
NM_001172689.1	chr19	38229203	38270230	41028	-	51248	NM_001172689.1	ZNF573	126231	1.16475	-1.35226	3.81198	0.0582203	0.553739	up
NM_033358.3	chr2	202098166	202146638	48473	+	7285	NM_033358.3	CASP8	841	1.60511	0.141089	3.80848	0.0583305	0.553754	up
NM_025239.3	chr9	5510545	5571282	60738	+	25642	NM_025239.3	PDCD1LG2	80380	0.648704	1.42437	3.80768	0.0583559	0.553754	up
NM_015057.4	chr13	77618792	77901177	282386	-	37922	NM_015057.4	MYCBP2	23077	-0.385603	8.52074	3.80684	0.0583822	0.553754	down
NM_005764.3	chr1	47649261	47655771	6511	-	3867	NM_005764.3	PDZK1IP1	10158	0.581971	1.44411	3.80669	0.0583871	0.553754	up
NM_138632.2	chr22	38142241	38155961	13721	+	55004	NM_138632.2	TRIOBP	11078	0.515461	0.382682	3.80229	0.0585262	0.553754	up
NM_031439.3	chr8	10581278	10588084	6807	-	24573	NM_031439.3	SOX7	83595	0.604568	5.04328	3.80129	0.0585577	0.553754	up
NM_001322263.2	chr7	143076248	143078118	1871	-	23435	NM_001322263.2	LOC100507507	100507507	0.269714	3.58319	3.80106	0.0585649	0.553754	up
NM_002735.2	chr7	588834	752161	163328	-	22281	NM_002735.2	PRKAR1B	5575	-0.987093	0.0114473	3.80098	0.0585675	0.553754	down
NM_203370.1	chr3	49840687	49842463	1777	+	10277	NM_203370.1	FAM212A	NA	0.3637	3.2812	3.79963	0.0586103	0.553754	up
NR_134286.1	chr5	17807383	17930598	123216	+	15296	NR_134286.1	LOC646241	NA	-0.552806	1.28566	3.79857	0.0586441	0.553754	down
NM_000859.2	chr5	74632993	74657926	24934	+	15641	NM_000859.2	HMGCR	3156	-1.05911	-0.682386	3.7976	0.0586746	0.553754	down
NM_001058.3	chr2	75273590	75426645	153056	-	8477	NM_001058.3	TACR1	6869	-0.930765	5.25751	3.79742	0.0586804	0.553754	down
NM_001166348.1	chr17	78194200	78227308	33109	+	45863	NM_001166348.1	SLC26A11	284129	1.16597	-1.26969	3.79695	0.0586952	0.553754	up
NM_006349.2	chr7	100860985	100867471	6487	+	21773	NM_006349.2	ZNHIT1	10467	0.218435	7.7955	3.79665	0.0587048	0.553754	up
NM_001025295.2	chr11	298200	299526	1327	-	32410	NM_001025295.2	IFITM5	387733	1.27176	-1.32584	3.79646	0.0587108	0.553754	up
NM_031459.4	chr1	28585963	28609002	23040	+	538	NM_031459.4	SESN2	83667	0.379968	5.74045	3.79625	0.0587176	0.553754	up
NM_182832.2	chr21	42547158	42557166	10009	-	54451	NM_182832.2	PLAC4	191585	1.23686	-0.351466	3.79596	0.0587266	0.553754	up
[truncated: 16,852 more rows]

## Sheet: Reactome enrichments
	Cluster	direction	ID	Description	GeneRatio	BgRatio	pvalue	p.adjust	qvalue	geneID	Count
1	up	up	R-HSA-6798695	Neutrophil degranulation	50/385	337/6937	7.66092e-11	5.89224e-08	5.64634e-08	MCEMP1/S100A9/SLC11A1/C3/LRG1/SERPINA3/CD177/S100A12/SLPI/RNASE2/PNP/GPR84/CLEC4D/S100A11/CHI3L1/MMP25/CD93/RNASET2/PLAUR/SIGLEC9/HK3/VAMP8/FCER1G/MGAM/TNFRSF1B/PECAM1/SIGLEC5/CDA/VNN1/FCN1/DOCK2/HSPA6/NBEAL2/COTL1/CYBA/SLC2A3/RNASE3/HLA-C/CTSC/C5AR1/P2RX1/B4GALT1/CTSZ/PSMD6/CXCR1/CYBB/DNASE1L1/MMP9/SIGLEC14/HSPA1A	50
2	up	up	R-HSA-6783783	Interleukin-10 signaling	13/385	26/6937	2.08962e-10	5.89224e-08	5.64634e-08	CXCL10/IL1B/CCL2/ICAM1/CCR2/TNFRSF1B/TNF/TIMP1/CXCL8/CCL22/CCR1/CD80/CXCL2	13
3	up	up	R-HSA-877300	Interferon gamma signaling	19/385	60/6937	2.23191e-10	5.89224e-08	5.64634e-08	SOCS3/IFI30/ICAM1/IRF1/HLA-DRB1/FCGR1A/GBP1/IFNGR1/GBP2/IRF8/HLA-DQB2/HLA-DPB1/HLA-C/HLA-DQA1/HLA-DRA/MT2A/SP100/OAS1/TRIM21	19
4	up	up	R-HSA-449147	Signaling by Interleukins	43/385	282/6937	7.72966e-10	1.53047e-07	1.4666e-07	CXCL10/SOCS3/IL1B/S100A12/CCL2/ICAM1/JAK3/MYC/CCR2/TGFB1/EBI3/LCP1/TNFRSF1B/HMOX1/TNF/TIMP1/CXCL8/IL1RL1/HAVCR2/CEBPD/CCL22/CCR1/NFKBIA/IL4R/CD80/TEC/CXCL2/FYN/IL18RAP/PSMD6/IL27RA/CSF2RB/IL2RG/MMP9/F13A1/MAP3K8/MAPKAPK2/IRAK2/HCK/SOCS2/LAMA5/IL13RA1/PSMB9	43
5	up	up	R-HSA-6785807	Interleukin-4 and Interleukin-13 signaling	20/385	72/6937	1.02143e-09	1.61795e-07	1.55043e-07	SOCS3/IL1B/CCL2/ICAM1/JAK3/MYC/TGFB1/TNFRSF1B/HMOX1/TNF/TIMP1/CXCL8/CEBPD/CCL22/IL4R/IL2RG/MMP9/F13A1/LAMA5/IL13RA1	20
6	up	up	R-HSA-166663	Initial triggering of complement	8/385	6937-10-01	3.42326e-09	4.5187e-07	4.33012e-07	C3/C1QB/FCN1/C1QC/C4B/C1R/CFB/C2	8
7	up	up	R-HSA-380108	Chemokine receptors bind chemokines	11/385	33/6937	8.53165e-07	9.65296e-05	9.25011e-05	CXCL10/CCL2/CCR2/CXCL3/CXCL8/CCL22/CCR1/CXCL6/CXCL2/CXCL16/CXCR1	11
8	up	up	R-HSA-166658	Complement cascade	9/385	22/6937	1.18751e-06	0.000116011	0.00011117	C3/C1QB/FCN1/C1QC/C4B/C1R/C5AR1/CFB/C2	9
9	up	up	R-HSA-198933	Immunoregulatory interactions between a Lymphoid and a non-Lymphoid cell	16/385	72/6937	1.39244e-06	0.000116011	0.00011117	C3/ICAM1/CD300E/SIGLEC9/SIGLEC8/RAET1E/SIGLEC5/FCGR1A/CLEC2B/HLA-C/LILRA2/TREML4/CD300C/IFITM1/CD1D/NECTIN2	16
10	up	up	R-HSA-913531	Interferon Signaling	22/385	127/6937	1.46479e-06	0.000116011	0.00011117	SOCS3/SAMHD1/IFI30/ICAM1/IRF1/HLA-DRB1/IFITM2/FCGR1A/GBP1/IFNGR1/GBP2/IRF8/HLA-DQB2/HLA-DPB1/HLA-C/HLA-DQA1/HLA-DRA/IFITM1/MT2A/SP100/OAS1/TRIM21	22
11	up	up	R-HSA-202433	Generation of second messenger molecules	8/385	19/6937	3.6856e-06	0.00024325	0.000233098	HLA-DRB1/WAS/LCP2/VASP/HLA-DQB2/HLA-DPB1/HLA-DQA1/HLA-DRA	8
12	up	up	R-HSA-977606	Regulation of Complement cascade	8/385	19/6937	3.6856e-06	0.00024325	0.000233098	C3/C1QB/C1QC/C4B/C1R/C5AR1/CFB/C2	8
13	up	up	R-HSA-375276	Peptide ligand-binding receptors	19/385	120/6937	2.90229e-05	0.00169223	0.0016216	CXCL10/C3/CCL2/CCR2/CXCL3/APLNR/BDKRB2/AVP/CXCL8/CCL22/CCR1/C5AR1/OXT/CXCL6/CXCL2/OXTR/CXCL16/CXCR1/BDKRB1	19
14	up	up	R-HSA-109582	Hemostasis	43/385	409/6937	2.99131e-05	0.00169223	0.0016216	SERPINA5/SELE/SERPINA3/CD177/KCNMB4/PFN1/IRF1/SERPINE1/GNA15/KIF19/TGFB1/TNFRSF10D/ITGA5/PLAUR/RAC2/JCHAIN/KIF20A/FCER1G/PLEK/TNFRSF10A/TIMP1/APBB1IP/LHFPL2/LCP2/PECAM1/DOCK2/CD48/VWF/ITPK1/SLC7A5/SELP/P2RX1/TOR4A/ATP2B2/FYN/KIFC1/TUBA1C/ESAM/ITPR3/NOS3/CAPZB/F13A1/THBS1	43
15	up	up	R-HSA-373076	Class A/1 (Rhodopsin-like receptors)	26/385	204/6937	5.44044e-05	0.00287255	0.00275267	CXCL10/C3/CCL2/GPR4/CCR2/CXCL3/APLNR/BDKRB2/AVP/CXCL8/CHRM5/FFAR2/CCL22/GPR65/CCR1/GPHA2/LPAR5/C5AR1/OXT/CXCL6/CXCL2/OXTR/CXCL16/CXCR1/BDKRB1/HCAR3	26
16	up	up	R-HSA-202733	Cell surface interactions at the vascular wall	14/385	81/6937	0.000124919	0.00618351	0.00592545	SELE/CD177/TGFB1/TNFRSF10D/ITGA5/JCHAIN/FCER1G/TNFRSF10A/PECAM1/CD48/SLC7A5/SELP/FYN/ESAM	14
17	up	up	R-HSA-202430	Translocation of ZAP-70 to Immunological synapse	5/385	6937-11-01	0.000179449	0.00836023	0.00801133	HLA-DRB1/HLA-DQB2/HLA-DPB1/HLA-DQA1/HLA-DRA	5
18	up	up	R-HSA-909733	Interferon alpha/beta signaling	9/385	41/6937	0.000326044	0.0143459	0.0137472	SOCS3/SAMHD1/IRF1/IFITM2/GBP2/IRF8/HLA-C/IFITM1/OAS1	9
19	up	up	R-HSA-1222556	ROS and RNS production in phagocytes	7/385	26/6937	0.000402458	0.0167762	0.016076	SLC11A1/RAC2/ATP6V0D2/CYBA/NCF1/NOS3/CYBB	7
20	up	up	R-HSA-389948	PD-1 signaling	5/385	13/6937	0.000455629	0.0180429	0.0172899	HLA-DRB1/HLA-DQB2/HLA-DPB1/HLA-DQA1/HLA-DRA	5
21	up	up	R-HSA-202427	Phosphorylation of CD3 and TCR zeta chains	5/385	14/6937	0.000676715	0.0255218	0.0244567	HLA-DRB1/HLA-DQB2/HLA-DPB1/HLA-DQA1/HLA-DRA	5
22	up	up	R-HSA-5668599	RHO GTPases Activate NADPH Oxidases	5/385	15/6937	0.000969245	0.0348928	0.0334366	S100A9/RAC2/CYBA/NCF1/CYBB	5
23	up	up	R-HSA-9658195	Leishmania infection	18/385	146/6937	0.00112897	0.038876	0.0372536	ARPC1B/C3/IL1B/GPR84/WAS/AVP/RAMP3/PRKX/FCGR1A/CYBA/GPHA2/CALCB/RHBDF2/ADM2/FYN/ITPR3/HCK/WASF2	18
24	up	up	R-HSA-5669034	TNFs bind their physiological receptors	5/385	16/6937	0.00134625	0.0444263	0.0425722	TNFRSF1B/TNFSF18/TNFRSF6B/TNFRSF11B/TNFRSF4	5
25	up	up	R-HSA-5660526	Response to metal ions	4/385	6937-10-01	0.00150091	0.0458778	0.0439632	MT1X/MT1A/MT1M/MT2A	4
26	up	up	R-HSA-500792	GPCR ligand binding	29/385	292/6937	0.00153145	0.0458778	0.0439632	CXCL10/C3/CCL2/GPR4/CCR2/CXCL3/APLNR/BDKRB2/AVP/CXCL8/RAMP3/CHRM5/FFAR2/CCL22/GPR65/CCR1/GPHA2/LPAR5/C5AR1/CALCB/OXT/CXCL6/CXCL2/ADM2/OXTR/CXCL16/CXCR1/BDKRB1/HCAR3	29
27	up	up	R-HSA-2132295	MHC class II antigen presentation	12/385	81/6937	0.00156402	0.0458778	0.0439632	IFI30/HLA-DRB1/KIF20A/HLA-DOA/HLA-DQB2/HLA-DPB1/HLA-DMB/CTSC/HLA-DQA1/HLA-DRA/TUBA1C/CAPZB	12
28	up	up	R-HSA-114608	Platelet degranulation	13/385	93/6937	0.00174423	0.0493367	0.0472778	SERPINA3/PFN1/SERPINE1/TGFB1/PLEK/TIMP1/LHFPL2/PECAM1/VWF/SELP/TOR4A/F13A1/THBS1	13

## Sheet: KEGG enrichments
	Cluster	direction	ID	Description	GeneRatio	BgRatio	pvalue	p.adjust	qvalue	geneID	Count
1	up	up	hsa05150	Staphylococcus aureus infection	19/307	46/5066	3.9753e-12	1.10116e-09	8.74566e-10	718/3383/713/3123/3111/3108/2209/714/721/3115/715/3109/728/3117/6403/3122/629/3866/717	19
2	up	up	hsa04060	Cytokine-cytokine receptor interaction	34/307	152/5066	1.01552e-11	1.4065e-09	1.11707e-09	3627/3553/6347/51330/729230/2921/7040/8793/10148/7133/6355/7124/8797/3576/9173/3459/8995/6367/1230/3566/4804/6372/2920/58191/8807/8771/3577/9466/4982/1439/3561/8794/7293/3597	34
3	up	up	hsa04061	Viral protein interaction with cytokine and cytokine receptor	18/307	52/5066	4.82464e-10	4.45475e-08	3.53807e-08	3627/6347/729230/2921/8793/7133/6355/7124/8797/3576/6367/1230/6372/2920/8807/3577/3561/8794	18
4	up	up	hsa05140	Leishmaniasis	17/307	49/5066	1.43078e-09	9.90813e-08	7.86927e-08	718/3553/3123/7040/7124/3111/3108/2209/3459/1535/3115/4792/3109/3117/3122/653361/1536	17
5	up	up	hsa05323	Rheumatoid arthritis	18/307	56/5066	1.92052e-09	1.06397e-07	8.45031e-08	3553/6347/3383/3123/2921/7040/7124/3111/3108/3576/245972/3115/3109/3117/941/3122/6372/2920	18
6	up	up	hsa05321	Inflammatory bowel disease	15/307	39/5066	2.60086e-09	1.20073e-07	9.53649e-08	3553/3123/7040/7124/3111/3108/3459/3115/3109/3117/3566/3122/7100/8807/3561	15
7	up	up	hsa04610	Complement and coagulation cascades	15/307	40/5066	3.93616e-09	1.55759e-07	1.23708e-07	5104/718/713/5054/5329/624/714/721/7450/715/728/629/623/2162/717	15
8	up	up	hsa05332	Graft-versus-host disease	11/307	22/5066	1.31345e-08	4.54781e-07	3.61198e-07	3553/3123/7124/3111/3108/3115/3109/3107/3117/941/3122	11
9	up	up	hsa04668	TNF signaling pathway	19/307	73/5066	3.37695e-08	1.03935e-06	8.25477e-07	3627/6401/9021/3553/602/6347/3383/3659/2921/197259/7133/7124/4792/8837/6372/2920/4318/8772/1326	19
10	up	up	hsa04659	Th17 cell differentiation	17/307	61/5066	6.05373e-08	1.56293e-06	1.24132e-06	3553/3718/3123/7040/3111/3108/3459/3115/4792/3109/3117/3566/3122/9466/3561/4794/861	17
11	up	up	hsa05310	Asthma	10/307	20/5066	6.20659e-08	1.56293e-06	1.24132e-06	3123/2207/7124/3111/3108/3115/6037/3109/3117/3122	10
12	up	up	hsa05144	Malaria	12/307	32/5066	1.4936e-07	3.44773e-06	2.73827e-06	6401/3553/6347/3383/7040/7124/3576/5175/6403/3039/3040/7057	12
13	up	up	hsa05171	Coronavirus disease - COVID-19	27/307	149/5066	1.81026e-07	3.85725e-06	3.06352e-06	3627/718/3553/6347/713/7124/3576/714/6205/6202/721/6147/7450/715/4792/728/6142/6403/629/6193/51284/6130/1536/4938/2162/717/6125	27
14	up	up	hsa05330	Allograft rejection	10/307	23/5066	3.26177e-07	6.45365e-06	5.12564e-06	3123/7124/3111/3108/3115/3109/3107/3117/941/3122	10
15	up	up	hsa04940	Type I diabetes mellitus	11/307	29/5066	4.38381e-07	8.09543e-06	6.42958e-06	3553/3123/7124/3111/3108/3115/3109/3107/3117/941/3122	11
16	up	up	hsa05169	Epstein-Barr virus infection	23/307	125/5066	1.15904e-06	2.00659e-05	1.59368e-05	3627/3383/3718/4609/3123/5971/7124/3111/1870/6890/3108/4616/10912/3115/4792/3109/3107/3117/3122/9861/4794/8772/4938	23
17	up	up	hsa05164	Influenza A	21/307	110/5066	1.84398e-06	2.87619e-05	2.28434e-05	3627/9021/3553/6347/3383/3123/7124/8797/3111/3108/3576/3459/3115/4792/3109/3117/3122/51284/29107/8772/4938	21
18	up	up	hsa05322	Systemic lupus erythematosus	17/307	76/5066	1.869e-06	2.87619e-05	2.28434e-05	718/713/3123/7124/3111/3108/2209/714/721/3115/715/3109/3117/941/3122/717/6737	17
19	up	up	hsa04380	Osteoclast differentiation	16/307	70/5066	2.78803e-06	4.01856e-05	3.19164e-05	9021/3553/7040/5971/7124/2355/3937/2209/3459/1535/4792/11027/7006/653361/2534/4982	16
20	up	up	hsa04145	Phagosome	20/307	104/5066	2.90149e-06	4.01856e-05	3.19164e-05	718/3123/3678/4481/3111/6890/3108/245972/2209/1535/3115/715/3109/3107/3117/3122/653361/84790/1536/7057	20
21	up	up	hsa05133	Pertussis	13/307	50/5066	5.33079e-06	7.03156e-05	5.58464e-05	718/3553/713/3659/3678/7124/3576/714/721/3394/715/6372/717	13
22	up	up	hsa05320	Autoimmune thyroid disease	9/307	24/5066	5.70742e-06	7.18616e-05	5.70742e-05	3123/3111/3108/3115/3109/3107/3117/941/3122	9
23	up	up	hsa04612	Antigen processing and presentation	13/307	52/5066	8.54199e-06	9.85888e-05	7.83016e-05	10437/3123/7124/3111/6890/3108/3310/3115/3109/3107/3117/3122/3303	13
24	up	up	hsa04640	Hematopoietic cell lineage	13/307	52/5066	8.54199e-06	9.85888e-05	7.83016e-05	3553/3123/3678/7124/3111/3108/2209/3115/3109/3117/3566/3122/912	13
25	up	up	hsa05142	Chagas disease	15/307	68/5066	9.16146e-06	0.000101509	8.06208e-05	718/3553/6347/713/5054/2769/7040/7124/624/3576/714/3459/4792/8837/8772	15
26	up	up	hsa05416	Viral myocarditis	12/307	47/5066	1.51275e-05	0.000161166	0.000128002	3383/3123/5880/3111/3108/3115/3109/3107/3117/941/3122/2534	12
27	up	up	hsa04657	IL-17 signaling pathway	12/307	48/5066	1.90911e-05	0.00019586	0.000155557	6280/3627/3553/6347/2921/7124/3576/4792/6372/2920/4318/8772	12
28	up	up	hsa04658	Th1 and Th2 cell differentiation	13/307	59/5066	3.70053e-05	0.000366088	0.000290756	3718/3123/3111/3108/3459/3115/4792/3109/3117/3566/3122/3561/4794	13
29	up	up	hsa04625	C-type lectin receptor signaling pathway	13/307	60/5066	4.47079e-05	0.000403436	0.000320419	26253/3553/602/3659/338339/2207/5971/7124/6367/4792/6237/3710/9261	13
30	up	up	hsa04062	Chemokine signaling pathway	20/307	124/5066	4.47467e-05	0.000403436	0.000320419	3627/6347/3718/729230/2921/7454/5880/6355/3576/1794/6367/5829/1230/4792/6372/653361/2920/58191/3577/3055	20
31	up	up	hsa04672	Intestinal immune network for IgA production	9/307	30/5066	4.51499e-05	0.000403436	0.000320419	3123/7040/3111/3108/3115/3109/3117/941/3122	9
32	up	up	hsa05145	Toxoplasmosis	14/307	71/5066	6.91754e-05	0.000598799	0.000475581	3123/7040/7124/3111/3108/3310/3459/3115/4792/3109/3117/3122/3303/3911	14
33	up	up	hsa04514	Cell adhesion molecules	17/307	102/5066	0.00011049	0.00092745	0.000736603	6401/3383/3123/7122/3111/3108/5175/3115/3109/3107/3117/6403/941/3122/64115/90952/5819	17
34	up	up	hsa05134	Legionellosis	10/307	41/5066	0.000119902	0.000976851	0.000775839	718/3553/2921/7124/3576/3310/4792/2920/7100/3303	10
35	up	up	hsa05152	Tuberculosis	18/307	113/5066	0.000127388	0.00100819	0.000800728	718/26253/3553/3123/7040/2207/7124/3111/3108/245972/2209/3459/3115/3109/3117/3122/8772/3656	18
36	up	up	hsa04621	NOD-like receptor signaling pathway	16/307	98/5066	0.0002252	0.00173279	0.00137622	3553/6347/2921/7124/3576/2633/2634/84674/1535/4792/2920/10135/3710/1536/8772/4938	16
37	up	up	hsa05166	Human T-cell leukemia virus 1 infection	20/307	145/5066	0.00040589	0.00303869	0.0024134	3383/3718/4609/3123/7040/5971/7124/3111/1870/3108/3115/4792/3109/3107/3117/3122/2114/4487/3561/9133	20
38	up	up	hsa04064	NF-kappa B signaling pathway	11/307	56/5066	0.000430935	0.00314129	0.00249489	3553/3383/2921/5971/7124/3576/4616/10912/4792/8837/2920	11
39	up	up	hsa04650	Natural killer cell mediated cytotoxicity	11/307	60/5066	0.000797926	0.00552564	0.00438859	3383/5880/2207/7124/8797/135250/3937/962/3459/3107/2534	11
40	up	up	hsa04666	Fc gamma R-mediated phagocytosis	11/307	60/5066	0.000797926	0.00552564	0.00438859	10095/7454/5880/7408/2209/85477/3985/653361/274/3055/10163	11
41	up	up	hsa05143	African trypanosomiasis	6/307	22/5066	0.00153728	0.010386	0.00824884	6401/3553/3383/7124/3039/3040	6
42	up	up	hsa05135	Yersinia infection	13/307	86/5066	0.00180667	0.0119154	0.00946353	10095/3553/6347/7454/3678/5880/7124/3576/3937/5829/4792/8874/10163	13
43	up	up	hsa04620	Toll-like receptor signaling pathway	10/307	57/5066	0.00194468	0.0125274	0.00994954	3627/3553/7124/3576/4792/941/51284/7100/8772/1326	10
44	up	up	hsa05167	Kaposi sarcoma-associated herpesvirus infection	16/307	119/5066	0.00200189	0.0126028	0.0100095	718/3383/4609/2921/1870/3576/3459/1230/9976/4792/3107/2920/3710/8772/9261/3055	16
45	up	up	hsa04933	AGE-RAGE signaling pathway in diabetic complications	11/307	71/5066	0.00328454	0.0202182	0.0160578	6401/3553/6347/3383/5054/7040/7124/3576/4846/1536/113026	11
46	up	up	hsa04218	Cellular senescence	14/307	103/5066	0.0034004	0.0204763	0.0162628	4609/5054/7040/1870/1978/3576/4616/10912/3107/6237/10114/3710/9261/9133	14
47	up	up	hsa04670	Leukocyte transendothelial migration	12/307	82/5066	0.00353886	0.0208393	0.0165511	3383/7122/5880/7408/5175/1535/5829/4633/653361/90952/1536/4318	12
48	up	up	hsa05130	Pathogenic Escherichia coli infection	16/307	126/5066	0.00361114	0.0208393	0.0165511	10095/3553/64005/4542/7122/7124/8797/3576/4792/57121/2534/7100/84790/8772/3059/10163	16
49	up	up	hsa04978	Mineral absorption	7/307	37/5066	0.00596658	0.0337295	0.0267887	4501/4489/3162/4499/491/4502/340024	7
50	up	up	hsa05146	Amoebiasis	10/307	67/5066	0.00652881	0.0361696	0.0287268	3553/2769/2921/7040/3315/7124/3576/2920/912/3911	10
51	up	up	hsa04066	HIF-1 signaling pathway	11/307	78/5066	0.0068393	0.0362917	0.0288237	5054/3101/3162/7076/1978/3099/3459/2872/4846/1536/5163	11
52	up	up	hsa04210	Apoptosis	12/307	89/5066	0.00693651	0.0362917	0.0288237	7124/8797/4616/10912/4792/8837/1075/1522/84790/3710/1439/8772	12
53	up	up	hsa04662	B cell receptor signaling pathway	7/307	38/5066	0.00694389	0.0362917	0.0288237	5880/118788/4792/11027/8519/25780/4794	7
54	up	up	hsa05131	Shigellosis	18/307	160/5066	0.00762456	0.0391112	0.031063	10095/718/3553/5216/3678/3101/7124/3576/92610/3099/5829/4792/4633/7100/3710/3059/113026/10163	18
55	up	up	hsa05418	Fluid shear stress and atherosclerosis	12/307	93/5066	0.00980446	0.0491071	0.039002	6401/3553/6347/3383/5880/3162/7124/5175/1535/653361/4846/4318	12
56	up	up	hsa04630	JAK-STAT signaling pathway	11/307	82/5066	0.00992779	0.0491071	0.039002	9021/3718/4609/2670/3459/3566/9466/1439/3561/8835/3597	11

## Sheet: GO enrichments
	Cluster	direction	ID	Description	GeneRatio	BgRatio	pvalue	p.adjust	qvalue	geneID	Count
1	down	down	GO:0014074	response to purine-containing compound	10/211	94/11479	8.38245e-06	0.0255078	0.0239915	DUSP1/SLC6A1/CASQ2/FOS/HCN4/CACNA1S/P2RY1/REN/PDE2A/TRPC3	10
2	down	down	GO:0051873	killing by host of symbiont cells	4/211	10/11479	2.13656e-05	0.0325077	0.0305752	ELANE/AZU1/CTSG/CAMP	4
3	down	down	GO:0051883	killing of cells in other organism involved in symbiotic interaction	4/211	12/11479	4.89236e-05	0.0496249	0.0466749	ELANE/AZU1/CTSG/CAMP	4
4	up	up	GO:0006954	inflammatory response	78/557	454/11479	1.90644e-23	7.99751e-20	6.73274e-20	S100A9/SLC11A1/CXCL10/SELE/C3/SOCS3/SERPINA3/HAMP/IL1B/S100A12/CCL2/ICAM1/GPR4/SERPINE1/HLA-DRB1/CHI3L1/MMP25/CCR2/CXCL3/TGFB1/SLAMF8/VAMP8/TNFAIP8L2/FCER1G/RELB/TNFRSF1B/HMOX1/CCL8/TNF/BDKRB2/TIMP1/CXCL8/IL1RL1/LY86/CD180/HAVCR2/VNN1/BCL6B/TPST1/C4B/IFNGR1/PIK3AP1/C2CD4B/STAB1/FFAR2/GPSM3/CYBA/CCL22/NEAT1/CCR1/NFKBIA/CELA1/CTSC/LY75/AIMP1/C5AR1/SELP/IL4R/P2RX1/CXCL6/CXCL2/B4GALT1/NAMPT/TLR7/SBNO…	78
5	up	up	GO:0019221	cytokine-mediated signaling pathway	77/557	482/11479	3.90429e-21	8.18924e-18	6.89415e-18	CXCL10/SOCS3/SAMHD1/IL1B/CCL2/IFI30/ICAM1/JAK3/IRF1/MYC/HLA-DRB1/TNFRSF12A/CCR2/CXCL3/TGFB1/EBI3/LCP1/FCER1G/TNFRSF1B/HMOX1/CCL8/TNF/IFITM2/TIMP1/CXCL8/IL1RL1/FCGR1A/GBP1/PLVAP/CEBPD/IFNGR1/GBP2/TNFSF18/IRF8/CCL22/HLA-DQB2/HLA-DPB1/CCR1/NFKBIA/HLA-C/HLA-DQA1/IL4R/CD80/HLA-DRA/TEC/IFITM1/CXCL6/CXCL2/MT2A/FYN/RACK1/IL18RAP/PSMD6/TNFRSF6B/CXCR1/IL27RA/SP100/TNFRSF11B/CSF2RB/IL2RG/MMP9/FADD/ADIPOR2/O…	77
6	up	up	GO:0002274	myeloid leukocyte activation	72/557	454/11479	1.32609e-19	1.4271e-16	1.20141e-16	MCEMP1/S100A9/SLC11A1/C3/LRG1/SERPINA3/CD177/S100A12/SLPI/RNASE2/PNP/GPR84/CLEC4D/S100A11/CHI3L1/MMP25/CCR2/CD93/RNASET2/PLAUR/SIGLEC9/RAC2/HK3/VAMP8/FCER1G/MGAM/RELB/TNFRSF1B/HMOX1/TNF/PRAM1/CXCL8/IL1RL1/LCP2/HAVCR2/PECAM1/SIGLEC5/CDA/VNN1/FCN1/DOCK2/HSPA6/NBEAL2/IFNGR1/COTL1/CYBA/SLC2A3/RNASE3/HLA-C/JMJD6/CTSC/LILRA2/C5AR1/IL4R/P2RX1/CXCL6/B4GALT1/NAMPT/CTSZ/TLR7/SBNO2/PLSCR1/IL18RAP/PSMD6/CXCR…	72
7	up	up	GO:0002250	adaptive immune response	51/557	241/11479	1.36076e-19	1.4271e-16	1.20141e-16	SLC11A1/C3/IL1B/BCL3/ICAM1/C1QB/JAK3/IRF1/HLA-DRB1/MYO1G/CLEC4D/AZGP1/CCR2/KLHL6/WAS/TGFB1/SASH3/EBI3/JCHAIN/FCER1G/RELB/TNFRSF1B/TNF/HLA-DOA/TAP1/HLA-DMA/IL1RL1/HAVCR2/C1QC/CD48/C4B/TNFSF18/HLA-DQB2/HLA-DPB1/C1R/HLA-DMB/HLA-C/CTSC/HLA-DQA1/IL4R/CD80/HLA-DRA/TEC/FYN/IL18RAP/CD1D/IL27RA/NFKBIZ/FADD/C2/NECTIN2	51
8	up	up	GO:0009617	response to bacterium	63/557	380/11479	3.19505e-18	2.68065e-15	2.25672e-15	S100A9/SLC11A1/CXCL10/SELE/C3/LRG1/CLEC4E/HAMP/IL1B/BCL3/S100A12/CCL2/ICAM1/SLPI/SERPINE1/HLA-DRB1/CLEC4D/CXCL3/KLHL6/TGFB1/SLAMF8/JCHAIN/FCER1G/TNFRSF1B/TNF/CXCL8/RNASE6/LY86/CD180/HAVCR2/MT1M/C4B/GBP2/STAB1/IRF8/WFDC3/CYBA/RNASE3/NFKBIA/CFLAR/LILRA2/C5AR1/SELP/CD80/CXCL6/CXCL2/SBNO2/TLR5/LY6G6C/TIMP4/NOS3/CD1D/IL27RA/NUGGC/FKBP5/BDKRB1/CSF2RB/MAOB/SMAD6/MAPKAPK2/IRAK2/HCK/C10orf99	63
9	up	up	GO:0002366	leukocyte activation involved in immune response	72/557	483/11479	4.63399e-18	3.23993e-15	2.72755e-15	MCEMP1/S100A9/SLC11A1/C3/LRG1/SERPINA3/CLEC4E/CD177/BCL3/S100A12/ICAM1/JAK3/SLPI/RNASE2/PNP/GPR84/CLEC4D/S100A11/CHI3L1/MMP25/CCR2/CD93/RNASET2/TGFB1/PLAUR/SIGLEC9/RAC2/HK3/VAMP8/LCP1/FCER1G/MGAM/RELB/TNFRSF1B/HMOX1/PRAM1/APBB1IP/CD180/HAVCR2/PECAM1/SIGLEC5/CDA/VNN1/FCN1/DOCK2/HSPA6/NBEAL2/TNFSF18/COTL1/CYBA/SLC2A3/RNASE3/HLA-DMB/HLA-C/CTSC/LILRA2/C5AR1/IL4R/CD80/P2RX1/B4GALT1/CTSZ/SBNO2/PSMD6/CX…	72
10	up	up	GO:0002263	cell activation involved in immune response	72/557	485/11479	5.85156e-18	3.50675e-15	2.95218e-15	MCEMP1/S100A9/SLC11A1/C3/LRG1/SERPINA3/CLEC4E/CD177/BCL3/S100A12/ICAM1/JAK3/SLPI/RNASE2/PNP/GPR84/CLEC4D/S100A11/CHI3L1/MMP25/CCR2/CD93/RNASET2/TGFB1/PLAUR/SIGLEC9/RAC2/HK3/VAMP8/LCP1/FCER1G/MGAM/RELB/TNFRSF1B/HMOX1/PRAM1/APBB1IP/CD180/HAVCR2/PECAM1/SIGLEC5/CDA/VNN1/FCN1/DOCK2/HSPA6/NBEAL2/TNFSF18/COTL1/CYBA/SLC2A3/RNASE3/HLA-DMB/HLA-C/CTSC/LILRA2/C5AR1/IL4R/CD80/P2RX1/B4GALT1/CTSZ/SBNO2/PSMD6/CX…	72
11	up	up	GO:0036230	granulocyte activation	56/557	358/11479	3.82148e-15	1.79909e-12	1.51458e-12	MCEMP1/S100A9/SLC11A1/C3/LRG1/SERPINA3/CD177/S100A12/SLPI/RNASE2/PNP/GPR84/CLEC4D/S100A11/CHI3L1/MMP25/CCR2/CD93/RNASET2/PLAUR/SIGLEC9/HK3/VAMP8/FCER1G/MGAM/TNFRSF1B/PRAM1/CXCL8/PECAM1/SIGLEC5/CDA/VNN1/FCN1/DOCK2/HSPA6/NBEAL2/COTL1/CYBA/SLC2A3/RNASE3/HLA-C/CTSC/LILRA2/C5AR1/P2RX1/CXCL6/B4GALT1/CTSZ/IL18RAP/PSMD6/CXCR1/CYBB/DNASE1L1/MMP9/SIGLEC14/HSPA1A	56
12	up	up	GO:0050900	leukocyte migration	49/557	283/11479	3.8598e-15	1.79909e-12	1.51458e-12	S100A9/CXCL10/SELE/CD177/IL1B/S100A12/CCL2/ICAM1/SERPINE1/MYO1G/CCR2/CXCL3/TGFB1/TNFRSF10D/ITGA5/SLAMF8/RAC2/JCHAIN/FCER1G/HMOX1/CCL8/TNF/TNFRSF10A/CXCL8/PECAM1/PLVAP/CD48/FFAR2/GPSM3/TNFSF18/CCL22/CCR1/SLC7A5/AIMP1/C5AR1/SELP/CXCL6/CXCL2/B4GALT1/FYN/CXCL16/ESAM/CXCR1/IL27RA/BDKRB1/FADD/THBS1/HCK/C10orf99	49
13	up	up	GO:0002275	myeloid cell activation involved in immune response	58/557	383/11479	5.25959e-15	2.2064e-12	1.85747e-12	MCEMP1/S100A9/SLC11A1/C3/LRG1/SERPINA3/CD177/S100A12/SLPI/RNASE2/PNP/GPR84/CLEC4D/S100A11/CHI3L1/MMP25/CCR2/CD93/RNASET2/PLAUR/SIGLEC9/RAC2/HK3/VAMP8/FCER1G/MGAM/TNFRSF1B/HMOX1/PRAM1/HAVCR2/PECAM1/SIGLEC5/CDA/VNN1/FCN1/DOCK2/HSPA6/NBEAL2/COTL1/CYBA/SLC2A3/RNASE3/HLA-C/CTSC/LILRA2/C5AR1/IL4R/P2RX1/B4GALT1/CTSZ/SBNO2/PSMD6/CXCR1/CYBB/DNASE1L1/MMP9/SIGLEC14/HSPA1A	58
14	up	up	GO:0042119	neutrophil activation	55/557	352/11479	7.19584e-15	2.74423e-12	2.31024e-12	MCEMP1/S100A9/SLC11A1/C3/LRG1/SERPINA3/CD177/S100A12/SLPI/RNASE2/PNP/GPR84/CLEC4D/S100A11/CHI3L1/MMP25/CD93/RNASET2/PLAUR/SIGLEC9/HK3/VAMP8/FCER1G/MGAM/TNFRSF1B/PRAM1/CXCL8/PECAM1/SIGLEC5/CDA/VNN1/FCN1/DOCK2/HSPA6/NBEAL2/COTL1/CYBA/SLC2A3/RNASE3/HLA-C/CTSC/LILRA2/C5AR1/P2RX1/CXCL6/B4GALT1/CTSZ/IL18RAP/PSMD6/CXCR1/CYBB/DNASE1L1/MMP9/SIGLEC14/HSPA1A	55
15	up	up	GO:0050778	positive regulation of immune response	59/557	400/11479	1.01117e-14	3.53487e-12	2.97585e-12	SLC11A1/ARPC1B/C3/CLEC4E/CD177/IL1B/C1QB/HLA-DRB1/MYO1G/CLEC4D/AZGP1/CCR2/BTNL3/KLHL6/WAS/TGFB1/SASH3/VAMP8/FCER1G/RELB/TNF/PRAM1/RAET1E/RGCC/LCP2/HAVCR2/FCGR1A/FCN1/C1QC/GBP1/C4B/FFAR2/HLA-DQB2/HLA-DPB1/C1R/SLC7A5/HLA-DMB/LILRA2/C5AR1/HLA-DQA1/IL4R/CD80/HLA-DRA/TEC/CFB/FYN/PLSCR1/IL18RAP/PSMD6/CD1D/IL27RA/NFKBIZ/FADD/C2/RUNX1/HCK/WASF2/NECTIN2/PSMB9	59
16	up	up	GO:0043299	leukocyte degranulation	56/557	374/11479	2.64201e-14	8.52557e-12	7.17729e-12	MCEMP1/S100A9/SLC11A1/C3/LRG1/SERPINA3/CD177/S100A12/SLPI/RNASE2/PNP/GPR84/CLEC4D/S100A11/CHI3L1/MMP25/CCR2/CD93/RNASET2/PLAUR/SIGLEC9/RAC2/HK3/VAMP8/FCER1G/MGAM/TNFRSF1B/HMOX1/PRAM1/PECAM1/SIGLEC5/CDA/VNN1/FCN1/DOCK2/HSPA6/NBEAL2/COTL1/CYBA/SLC2A3/RNASE3/HLA-C/CTSC/C5AR1/IL4R/P2RX1/B4GALT1/CTSZ/PSMD6/CXCR1/CYBB/DNASE1L1/MMP9/SIGLEC14/HSPA1A/HCK	56
17	up	up	GO:0002460	adaptive immune response based on somatic recombination of immune receptors built from immunoglobulin superfamily domains	35/557	160/11479	2.9649e-14	8.88411e-12	7.47913e-12	SLC11A1/C3/IL1B/BCL3/ICAM1/C1QB/JAK3/HLA-DRB1/MYO1G/AZGP1/CCR2/KLHL6/WAS/TGFB1/SASH3/EBI3/FCER1G/RELB/TNFRSF1B/TNF/IL1RL1/HAVCR2/C1QC/C4B/C1R/CTSC/IL4R/CD80/IL18RAP/CD1D/IL27RA/NFKBIZ/FADD/C2/NECTIN2	35
18	up	up	GO:0002444	myeloid leukocyte mediated immunity	56/557	388/11479	1.29834e-13	3.63104e-11	3.0568e-11	MCEMP1/S100A9/SLC11A1/C3/LRG1/SERPINA3/CD177/S100A12/SLPI/RNASE2/PNP/GPR84/CLEC4D/S100A11/CHI3L1/MMP25/CCR2/CD93/RNASET2/PLAUR/SIGLEC9/RAC2/HK3/VAMP8/FCER1G/MGAM/TNFRSF1B/HMOX1/PRAM1/PECAM1/SIGLEC5/CDA/VNN1/FCN1/DOCK2/HSPA6/NBEAL2/COTL1/CYBA/SLC2A3/RNASE3/HLA-C/CTSC/C5AR1/IL4R/P2RX1/CXCL6/B4GALT1/CTSZ/PSMD6/CXCR1/CYBB/DNASE1L1/MMP9/SIGLEC14/HSPA1A	56
19	up	up	GO:0006959	humoral immune response	30/557	125/11479	1.59902e-13	4.10621e-11	3.45683e-11	S100A9/SLC11A1/CXCL10/C3/IL1B/BCL3/S100A12/CCL2/C1QB/SLPI/HLA-DRB1/CCR2/CXCL3/EBI3/JCHAIN/TNF/CXCL8/RNASE6/RGCC/FCN1/C1QC/C4B/WFDC3/C1R/RNASE3/C5AR1/CFB/CXCL6/CXCL2/C2	30
20	up	up	GO:0002697	regulation of immune effector process	43/557	247/11479	1.66402e-13	4.10621e-11	3.45683e-11	C3/CD177/IL1B/ICAM1/C1QB/JAK3/AZGP1/CCR2/WAS/TGFB1/SASH3/SLAMF8/RAC2/VAMP8/FCER1G/TNFRSF1B/HMOX1/TNF/PRAM1/RAET1E/HAVCR2/C1QC/C4B/MZB1/FFAR2/C1R/SLC7A5/HLA-DMB/C5AR1/IL4R/CD80/CFB/CXCL6/IL18RAP/CD1D/IL27RA/NFKBIZ/FADD/C2/TNFRSF4/ZDHHC11/NECTIN2/DTX3L	43
[truncated: 399 more rows]
